# Supplementary material for: Higher versus lower positive end-expiratory pressure in patients without acute respiratory distress syndrome: a meta-analysis of randomized controlled trials
Source: Springer Nature journal article supplement (doi:10.1186/s13054-021-03669-4), 2021-07-15
Supplement: MOESM1 [file 19364936]

**Higher versus lower positive end-expiratory pressure in patients without acute respiratory distress syndrome: a meta-analysis of randomized controlled trials**

Tommaso Pettenuzzo, Annalisa Boscolo, Alessandro De Cassai, Nicolò Sella, Francesco Zarantonello, Paolo Persona, Laura Pasin, Giovanni Landoni, Paolo Navalesi

Corresponding author:

Tommaso Pettenuzzo, MD

Institute of Anesthesia and Intensive Care, University Hospital of Padua, Padua, Italy, 13 Via Gallucci, 35121 Padua, Italy

Phone: +390498213090; email: [tommasopettenuzzo@gmail.com](mailto:tommasopettenuzzo@gmail.com)

ORCID iD: 0000-0002-6745-8919

## Online Resource Contents

|                                                                                                                                                      |     |
|------------------------------------------------------------------------------------------------------------------------------------------------------|-----|
| Online Resource 1. Methods.....                                                                                                                      | 4   |
| Participants, Interventions, Comparisons, Outcomes, and Study design question.....                                                                   | 4   |
| Database search strategies.....                                                                                                                      | 4   |
| Risk of bias assessment.....                                                                                                                         | 5   |
| Online Resource 2. Included studies and major exclusions.....                                                                                        | 7   |
| Studies included in both the qualitative and quantitative review.....                                                                                | 7   |
| Studies included in the qualitative review only.....                                                                                                 | 8   |
| Studies on non-invasive mechanical ventilation.....                                                                                                  | 9   |
| Studies with less than 2 levels of positive end-expiratory pressure (PEEP) and/or change in other ventilatory settings and/or crossover studies..... | 9   |
| Non-RCT study.....                                                                                                                                   | 10  |
| Studies not on ICU patients.....                                                                                                                     | 11  |
| Study on ARDS patients.....                                                                                                                          | 11  |
| Conference proceeding.....                                                                                                                           | 11  |
| Online Resource 3. Preferred Reporting Items for Systematic Reviews and Meta-Analyses (PRISMA) checklist.....                                        | 12  |
| Table S1. PRISMA checklist.....                                                                                                                      | 12  |
| Online Resource 4. Characteristics of included studies.....                                                                                          | 14  |
| Table S2. General study characteristics.....                                                                                                         | 14  |
| Table S3. Patients and ventilation settings.....                                                                                                     | 16  |
| Table S4. Outcomes in the higher PEEP group.....                                                                                                     | 18  |
| Table S5. Outcomes in the lower PEEP group.....                                                                                                      | 20  |
| Online Resource 5. Risk of bias assessment.....                                                                                                      | 22  |
| Table S6. Risk of bias summary.....                                                                                                                  | 22  |
| Fig. S1. Risk of bias summary.....                                                                                                                   | 23  |
| Fig. S2. Risk of bias graph.....                                                                                                                     | 24  |
| Table S7. Risk of bias for each study with signaling questions.....                                                                                  | 25  |
| Online Resource 6. Primary and secondary outcomes.....                                                                                               | 75  |
| Table S8. Summary of main meta-analysis.....                                                                                                         | 75  |
| Forest plots of other secondary outcomes.....                                                                                                        | 76  |
| Online Resource 7. Funnel plots.....                                                                                                                 | 92  |
| Online Resource 8. Sensitivity analyses.....                                                                                                         | 112 |
| Sensitivity analyses: timing of measurement.....                                                                                                     | 112 |



|                                                                                                                                                          |     |
|----------------------------------------------------------------------------------------------------------------------------------------------------------|-----|
| Sensitivity analyses: odds ratio.....                                                                                                                    | 115 |
| Sensitivity analyses: without studies at high risk of bias.....                                                                                          | 116 |
| Forest plots of sensitivity analyses.....                                                                                                                | 118 |
| Online Resource 9. Subgroup analyses.....                                                                                                                | 170 |
| Subgroup analyses: medical vs. surgical patients.....                                                                                                    | 170 |
| Subgroup analyses: zero end-expiratory pressure vs. lower PEEP.....                                                                                      | 172 |
| Subgroup analyses: tidal volume > 8 mL/kg vs. tidal volume < 8 mL/kg. ....                                                                               | 176 |
| Subgroup analyses: studies published before 2000 vs. studies published after 2000.....                                                                   | 179 |
| Forest plots of subgroup analyses.....                                                                                                                   | 182 |
| Online Resource 10. Meta-regression.....                                                                                                                 | 242 |
| Table S9. Meta-regression for the association between PEEP level and primary outcome and main secondary outcomes<br>using tidal volume as covariate..... | 242 |
| Online Resource 11. Trial sequential analysis.....                                                                                                       | 243 |
| References.....                                                                                                                                          | 244 |

## Online Resource 1. Methods

### Participants, Interventions, Comparisons, Outcomes, and Study design question

- Participants: adult patients in the intensive care unit (ICU) undergoing invasive mechanical ventilation
- Interventions: higher positive end-expiratory pressure (PEEP)
- Comparisons: lower PEEP
- Outcomes:
  - Primary outcome: hospital mortality
  - Secondary outcomes:
    - Arterial partial pressure of oxygen to fraction of inspired oxygen ratio
    - Alveolar-arterial oxygen pressure difference
    - Hypoxemia
    - Respiratory system compliance
    - Atelectasis
    - Barotrauma
    - Development of acute respiratory distress syndrome (ARDS)
    - Ventilator-associated pneumonia
    - Cardiac index
    - Central venous pressure
    - Hypotension
    - Postoperative bleeding and transfusion
    - Duration of ventilation
    - ICU length of stay
    - Hospital length of stay
    - ICU mortality
    - 28-day mortality
- Study design: randomized controlled trials.

### Database Search Strategies

MEDLINE search strategy (744 citations):

Ovid MEDLINE(R) 1946 to June Week 3 2021

Ovid MEDLINE(R) Epub Ahead of Print and In-Process & Other Non-Indexed Citations June 16, 2021

1. positive end expiratory pressure.mp,kw.
2. positive end-expiratory pressure.mp,kw.
3. PEEP.mp,kw.
4. or/1-3 [PEEP]
5. randomized controlled trial.pt.
6. RCT.mp,kw.
7. random\*.mp,kw.
8. or/5-7 [RCT]
9. 4 and 8 [PEEP + RCT]

EMBASE search strategy (3635 citations): see MEDLINE search strategy

Scopus search strategy (5511 citations):

((POSITIVE END-EXPIRATORY PRESSURE) OR PEEP) AND ((RANDOMIZED CONTROLLED TRIAL\*) OR RCT)

Cochrane Central Register of Controlled Trials search strategy (2942 citations): see Scopus search strategy

CINAHL search strategy (404 citations): see Scopus search strategy

Web of Science search strategy (672 citations): see Scopus search strategy

OpenGrey search strategy (22 citations): (POSITIVE END-EXPIRATORY PRESSURE) OR PEEP

## **Risk of Bias Assessment**

The risk of bias (ROB) of the included studies was independently assessed by three authors (TP, PP, FZ) according to the revised Cochrane ROB tool for randomized trials (RoB 2) [S1]. RoB2 examines 5 domains of bias: 1) randomization process; 2) deviations from intended interventions; 3) missing outcome data; 4) measurement of the outcome; and 5) selection of the reported results. The overall RoB judgment for each domain was attributed according to the criteria specified in the RoB 2 tool. The study was considered at low risk of bias when it was judged to be at low risk of bias for all domains; the study was considered to raise some concern when it was judged to raise some concerns in at least one domain, but not to be at high risk of bias for any domain; the study was considered at high risk of bias when it was judged to be at high risk of bias in at least one domain or it was judged to have some concerns for multiple domains in a way that substantially lowered confidence in the result. The risk of bias of individual studies was examined at the study level. All disagreements were resolved by discussion or referral to a third author (LP) if necessary.

## Online Resource 2. Included Studies and Major Exclusions

### Studies included in both the qualitative and quantitative review

1. Good JT Jr, Wolz JF, Anderson JT, Dreisin RB, Petty TL. The routine use of positive end-expiratory pressure after open heart surgery. *Chest*. 1979;76:397–400.
2. Zurick AM, Urzua J, Ghattas M, Cosgrove DM, Estafanous FG, Greenstreet R. Failure of positive end-expiratory pressure to decrease postoperative bleeding after cardiac surgery. *Ann Thorac Surg*. 1982;34:608–11.
3. Marvel SL, Elliott CG, Tocino I, Greenway LW, Metcalf SM, Chapman RH. Positive end-expiratory pressure following coronary artery bypass grafting. *Chest*. 1986;90:537–41.
4. Michalopoulos A, Anthi A, Rellos K, Geroulanos S. Effects of positive end-expiratory pressure (PEEP) in cardiac surgery patients. *Respir Med*. 1998;92:858–62.
5. Collier B, Kolff J, Devineni R, Gonzalez LS. Prophylactic positive end-expiratory pressure and reduction of postoperative blood loss in open-heart surgery. *Ann Thorac Surg*. 2002;74(4):1191-1194.
6. Dyhr T, Laursen N, Larsson A. Effects of lung recruitment maneuver and positive end-expiratory pressure on lung volume, respiratory mechanics and alveolar gas mixing in patients ventilated after cardiac surgery. *Acta Anaesthesiol Scand*. 2002;46:717–25.
7. Koutsoukou A, Perraki H, Raftopoulou A, et al. Respiratory mechanics in brain-damaged patients. *Intensive Care Med*. 2006;32(12):1947-1954.
8. Holland A, Thuemer O, Schelenz C, van Hout N, Sakka SG. Positive end-expiratory pressure does not affect indocyanine green plasma disappearance rate or gastric mucosal perfusion after cardiac surgery. *Eur J Anaesthesiol*. 2007;24:141–7.
9. Korovesi I, Papadomichelakis E, Orfanos SE, et al. Exhaled breath condensate in mechanically ventilated brain-injured patients with no lung injury or sepsis. *Anesthesiology*. 2011;114(5):1118-1129.
10. Korovesi I, Kotanidou A, Papadomichelakis E, et al. Exhaled nitric oxide and carbon monoxide in mechanically ventilated brain-injured patients. *J Breath Res*. 2016;10(1):017107.
11. Lago Borges D, Nina VJ, Costa Mde A, Baldez TE, Santos NP, Lima IM, et al. Effects of different PEEP levels on respiratory mechanics and oxygenation after coronary artery bypass grafting. *Rev Bras Cir Cardiovasc*. 2013;28:380–5.

12. Lago Borges D, da Silva José, Nina V, Pereira Baldez TE, de Albuquerque Gonçalves Costa M, Pereira dos Santos N, Mendes Limaf I, et al. Effects of positive end-expiratory pressure on mechanical ventilation duration after coronary artery bypass grafting: a randomized clinical trial. *Ann Thorac Cardiovasc Surg*. 2014;20(Suppl):773–7.
13. Feeley TW, Saumarez R, Klick JM, McNabb TG, Skillman JJ. Positive end- expiratory pressure in weaning patients from controlled ventilation. A prospective randomised trial. *Lancet*. 1975;2:725–9.
14. Weigelt JA, Mitchell RA, Snyder WH 3rd. Early positive end-expiratory pressure in the adult respiratory distress syndrome. *Arch Surg*. 1979;114:497–501.
15. Pepe PE, Hudson LD, Carrico CJ. Early application of positive end- expiratory pressure in patients at risk for the adult respiratory-distress syndrome. *N Engl J Med*. 1984;311:281–6.
16. Nelson LD, Civetta JM, Hudson-Civetta J. Titrating positive end-expiratory pressure therapy in patients with early, moderate arterial hypoxemia. *Crit Care Med*. 1987;15:14–9.
17. Manzano F, Fernández-Mondéjar E, Colmenero M, Poyatos ME, Rivera R, Machado J, et al. Positive-end expiratory pressure reduces incidence of ventilator-associated pneumonia in nonhypoxemic patients. *Crit Care Med*. 2008;36:2225–31.
18. Lesur O, Remillard MA, St-Pierre C, Falardeau S. Prophylactic positive end- expiratory pressure and postintubation hemodynamics: an interven- tional, randomized study. *Can Respir J*. 2010;17:e45–50.
19. Ma C, Liang D, Zheng F. Effect of high positive end-expiratory pressure for mechanical ventilation in the treatment of neurological pulmonary edema. *Zhonghua Wei Zhong Bing Ji Jiu Yi Xue*. 2014;26:339–42.
20. Algera AG, Pisani L, Serpa Neto A, et al; Writing Committee and Steering Committee for the RELAx Collaborative Group. Effect of a lower vs. higher positive end-expiratory pressure strategy on ventilator-free days in ICU patients without ARDS: a randomized clinical trial. *JAMA*. 2020;324(24):2509.

#### **Studies included in the qualitative review only**

1. Murphy DA, Finlayson DC, Craver JM, Jones EL, Kopel M, Tobia V, et al. Effect of positive end-expiratory pressure on excessive mediastinal bleed- ing after cardiac operations. A controlled study. *J Thorac Cardiovasc Surg*. 1983;85:864–9.
2. Vigil AR, Clevenger FW. The effects of positive end-expiratory pressure of intrapulmonary shunt and ventilatory deadspace in nonhypoxic trauma patients. *J Trauma*. 1996;40:618–22.

### **Studies on non-invasive mechanical ventilation**

1. Carroll GC, Tuman KJ, Braverman B, et al. Minimal positive end-expiratory pressure (PEEP) may be “best PEEP”. *Chest*. 1988;93:1020–1025.
2. Choo-Kang YFJ, Parker SS, Grant IWB. Response of asthmatics to isoprenaline and salbutamol aerosols administered by intermittent positive-pressure ventilation. *BMJ*. 1970;4(5733):465-468.

### **Studies with less than 2 levels of peep and/or change in other ventilatory settings and/or crossover studies**

1. Auler Jr. JOC, Carmona MJC, Barbas CV, Saldiva PHN, Malbouisson LMS. The effects of positive end-expiratory pressure on respiratory system mechanics and hemodynamics in postoperative cardiac surgery patients. *Braz J Med Biol Res*. 2000;33(1):31-42.
2. Baxter WD. An evaluation of intermittent positive pressure breathing in the prevention of postoperative pulmonary complications. *Arch Surg*. 1969;98(6):795.
3. Cao F, Chen R, Liu X, He R. Effect of positive end-expiratory pressure on the pressure gradient of venous return in hypovolemic patients under mechanical ventilation. *Zhongguo Wei Zhong Bing Ji Jiu Yi Xue*. 2009;21(10):583-586.
4. Cujec B, Polasek P, Mayers I, Johnson D. Positive end-expiratory pressure increases the right-to-left shunt in mechanically ventilated patients with patent foramen ovale. *Ann Intern Med*. 1993;119:887–894.
5. Saner FH, Olde Damink SWM, Pavlaković G, et al. Positive end-expiratory pressure induces liver congestion in living donor liver transplant patients: myth or fact. *Transplantation*. 2008;85(12):1863-1866.
6. Saner FH, Pavlakovic G, Gu Y, et al. Effects of positive end-expiratory pressure on systemic haemodynamics, with special interest to central venous and common iliac venous pressure in liver transplanted patients. *Eur J Anaesthesiol*. 2006;23(9):766-771.
7. Saner FH, Olde Damink SWM, Pavlaković G, et al. How far can we go with positive end-expiratory pressure (PEEP) in liver transplant patients? *J Clin Anesth*. 2010;22(2):104-109.
8. Celebi S, Köner O, Menda F, Korkut K, Suzer K, Cakar N. The pulmonary and hemodynamic effects of two different recruitment maneuvers after cardiac surgery. *Anesth Analg*. 2007;104:384–90.
9. Huang C-C, Tsai Y-H, Lin M-C, Tsao TCY, Hsu K-H. Gastric intramucosal PCO<sub>2</sub> and pH variability in ventilated critically ill patients. *Crit Care Med*. 2001;29(1):88-95.

10. Kong W, Wang C, Yang Y, Huang K, Jiang C. Effects of extrinsic positive end-expiratory pressure on work of breathing in patients with chronic obstructive pulmonary disease. *Chin Med J (Engl)*. 2001;114(8):791-794.
11. Kumar A, Pontoppidan H, Baratz RA, Laver MB. Inappropriate response to increased plasma ADH during mechanical ventilation in acute respiratory failure. *Anesthesiology*. 1974;40(3):215-221.
12. Mascia L, Grasso S, Fiore T, Bruno F, Berardino M, Ducati A. Cerebro-pulmonary interactions during the application of low levels of positive end-expiratory pressure. *Intensive Care Med*. 2005;31(3):373-379.
13. Mauri T, Eronia N, Turrini C, et al. Bedside assessment of the effects of positive end-expiratory pressure on lung inflation and recruitment by the helium dilution technique and electrical impedance tomography. *Intensive Care Med*. 2016;42(10):1576-1587.
14. Nikki P, Räsänen J, Tahvanainen J, Mäkeläinen A. Ventilatory pattern in respiratory failure arising from acute myocardial infarction. I. Respiratory and hemodynamic effects of IMV4 vs IPPV12 and PEEP0 vs PEEP10. *Crit Care Med*. 1982;10(2):75-78.
15. Reis Miranda D, Gommers D, Struijs A, et al. The open lung concept: effects on right ventricular afterload after cardiac surgery. *Br J Anaesth*. 2004;93(3):327-332.
16. Reissmann HK, Ranieri VM, Goldberg P, Gottfried SB. Continuous positive airway pressure facilitates spontaneous breathing in weaning chronic obstructive pulmonary disease patients by improving breathing pattern and gas exchange. *Intensive Care Med*. 2000;26(12):1764-1772.
17. Tobin MJ, Jenouri G, Birch S, et al. Effect of positive end-expiratory pressure on breathing patterns of normal subjects and intubated patients with respiratory failure. *Crit Care Med*. 1983;11(11):859-867.
18. Torelli L, Zoccali G, Casarin M, Dalla Zuanna F, Lieta E, Conti G. Comparative evaluation of the haemodynamic effects of continuous negative external pressure (CNEP) and positive end-expiratory pressure (PEEP) in mechanically ventilated trauma patients. *Intensive Care Med*. 1995;21(1):67-70.
19. Tsai Y-H, Lin M-C, Hsieh M-J, et al. Spontaneous variability of arterial oxygenation in critically ill mechanically ventilated patients. *Intensive Care Med*. 1999;25(1):37-43.
20. Vitacca M, Bianchi L, Zanotti E, et al. Assessment of physiologic variables and subjective comfort under different levels of pressure support ventilation. *Chest*. 2004;126(3):851-859.

### **Non-RCT study**

1. Dongelmans DA, Hemmes SN, Kudoga AC, Veelo DP, Binnekade JM, Schultz MJ. Positive end-expiratory pressure following coronary artery bypass grafting. *Minerva Anesthesiol*. 2012;78:790-800.



### **Studies not on ICU patients**

1. Calzia E, Lindner KH, Stahl W, Martin A, Radermacher P, Georgieff M. Work of breathing, inspiratory flow response, and expiratory resistance during continuous positive airway pressure with the ventilators EVITA-2, EVITA-4 and SV 300. *Intensive Care Med.* 1998;24(9):931-938.
2. Claxton BA, Morgan P, Mckeague H, Mulpur A, Berridge J. Alveolar recruitment strategy improves arterial oxygenation after cardiopulmonary bypass: Arterial oxygenation after cardiopulmonary bypass. *Anaesthesia.* 2003;58(2):111-116.
3. Oliveira CC, Carrascosa CR, Borghi-Silva A, et al. Influence of respiratory pressure support on hemodynamics and exercise tolerance in patients with COPD. *Eur J Appl Physiol.* 2010;109(4):681-689.

### **Study on ARDS patients**

1. Borelli M, Fumagalli R, Bernasconi F, Cereda M, Gattinoni L, Pesenti A. Relief of hypoxemia contributes to a reduction in cardiac index related to the use of positive end-expiratory pressure. *Intensive Care Med.* 1996;22(5):382-386.

### **Conference proceeding**

1. Schmidt GB, O'Neill WW, Kotb K, Hwang KK, Bennett EJ, Bombeck CT. Continuous positive airway pressure in the prophylaxis of the adult respiratory distress syndrome. *Surg Gynecol Obstet.* 1976;143:613–8.

### Online Resource 3. Preferred Reporting Items for Systematic Reviews and Meta-Analyses (PRISMA) checklist

| <b>Table S1. PRISMA checklist</b> |          |                                                                                                                                                                                                                                                                                                             |                           |
|-----------------------------------|----------|-------------------------------------------------------------------------------------------------------------------------------------------------------------------------------------------------------------------------------------------------------------------------------------------------------------|---------------------------|
| <b>Section/topic</b>              | <b>#</b> | <b>Checklist item</b>                                                                                                                                                                                                                                                                                       | <b>Reported on page #</b> |
| <b>Title</b>                      |          |                                                                                                                                                                                                                                                                                                             |                           |
| Title                             | 1        | Identify the report as a systematic review, meta-analysis, or both.                                                                                                                                                                                                                                         | 1                         |
| <b>Abstract</b>                   |          |                                                                                                                                                                                                                                                                                                             |                           |
| Structured summary                | 2        | Provide a structured summary including, as applicable: background; objectives; data sources; study eligibility criteria, participants, and interventions; study appraisal and synthesis methods; results; limitations; conclusions and implications of key findings; systematic review registration number. | 1, 2                      |
| <b>Introduction</b>               |          |                                                                                                                                                                                                                                                                                                             |                           |
| Rationale                         | 3        | Describe the rationale for the review in the context of what is already known.                                                                                                                                                                                                                              | 2, 3                      |
| Objectives                        | 4        | Provide an explicit statement of questions being addressed with reference to participants, interventions, comparisons, outcomes, and study design (PICOS).                                                                                                                                                  | 3, Online Resource 1      |
| <b>Methods</b>                    |          |                                                                                                                                                                                                                                                                                                             |                           |
| Protocol and registration         | 5        | Indicate if a review protocol exists, if and where it can be accessed (e.g., Web address), and, if available, provide registration information including registration number.                                                                                                                               | 5                         |
| Eligibility criteria              | 6        | Specify study characteristics (e.g., PICOS, length of follow-up) and report characteristics (e.g., years considered, language, publication status) used as criteria for eligibility, giving rationale.                                                                                                      | 3, Online Resource 1      |
| Information sources               | 7        | Describe all information sources (e.g., databases with dates of coverage, contact with study authors to identify additional studies) in the search and date last searched.                                                                                                                                  | 3, Online Resource 1      |
| Search                            | 8        | Present full electronic search strategy for at least one database, including any limits used, such that it could be repeated.                                                                                                                                                                               | Online Resource 1         |
| Study selection                   | 9        | State the process for selecting studies (i.e., screening, eligibility, included in systematic review, and, if applicable, included in the meta-analysis).                                                                                                                                                   | 4                         |
| Data collection process           | 10       | Describe method of data extraction from reports (e.g., piloted forms, independently, in duplicate) and any processes for obtaining and confirming data from investigators.                                                                                                                                  | 4                         |

| <b>Table S1 (continued)</b>        |    |                                                                                                                                                                                                                        |                      |
|------------------------------------|----|------------------------------------------------------------------------------------------------------------------------------------------------------------------------------------------------------------------------|----------------------|
| Data items                         | 11 | List and define all variables for which data were sought (e.g., PICOS, funding sources) and any assumptions and simplifications made.                                                                                  | 3, Online Resource 1 |
| Risk of bias in individual studies | 12 | Describe methods used for assessing risk of bias of individual studies (including specification of whether this was done at the study or outcome level), and how this information is to be used in any data synthesis. | 4, Online Resource 1 |
| Summary measures                   | 13 | State the principal summary measures (e.g., risk ratio, difference in means).                                                                                                                                          | 4                    |
| Synthesis of results               | 14 | Describe the methods of handling data and combining results of studies, if done, including measures of consistency (e.g., $I^2$ ) for each meta-analysis.                                                              | 4, 5                 |

#### Online Resource 4. Characteristics of Included Studies

| <b>Table S2. General study characteristics</b> |                        |                                                                  |                  |                                                                                                                                                                                                                                                                                                                       |
|------------------------------------------------|------------------------|------------------------------------------------------------------|------------------|-----------------------------------------------------------------------------------------------------------------------------------------------------------------------------------------------------------------------------------------------------------------------------------------------------------------------|
| <b>First author</b>                            | <b>Year</b>            | <b>Type of patients</b>                                          | <b>N</b>         | <b>Main findings</b>                                                                                                                                                                                                                                                                                                  |
| Collier                                        | 2002                   | Post-cardiac surgery                                             | 84               | Increased postoperative bleeding with higher PEEP                                                                                                                                                                                                                                                                     |
| Dyhr                                           | 2002                   | Post-cardiac surgery                                             | 15               | Increased oxygenation and end-expiratory lung volume and decreased atelectasis with higher PEEP                                                                                                                                                                                                                       |
| Feeley                                         | 1975                   | ARF during weaning from MV                                       | 25               | Improvement in vital capacity and maximum inspiratory force and less increase in intra-pulmonary shunt with higher PEEP                                                                                                                                                                                               |
| Good                                           | 1979                   | Post-cardiac surgery                                             | 24               | No differences regarding atelectasis and oxygenation                                                                                                                                                                                                                                                                  |
| Holland                                        | 2007                   | Post-cardiac surgery                                             | 28               | No differences regarding cardiac function, liver function, and gastric mucosal perfusion.                                                                                                                                                                                                                             |
| Korovesi                                       | 2011-2016 <sup>a</sup> | Brain injury with MV < 24 hours                                  | 27 <sup>a</sup>  | Korovesi 2011: no differences regarding exhaled breath condensate markers, with the exception of interleukin-10, and lower systemic inflammatory indices with higher PEEP. Korovesi 2016: no differences regarding exhaled nitric oxide trend with significant decrease in exhaled carbon monoxide in the ZEEP group. |
| Koutsoukou                                     | 2006                   | Severe brain damage                                              | 21               | No differences regarding exhaled NO trend and significant decrease in exhaled CO in the ZEEP group.                                                                                                                                                                                                                   |
| Lago Borges                                    | 2013-2014 <sup>b</sup> | Post-cardiac surgery                                             | 136 <sup>b</sup> | Lago Borges 2013: higher compliance and oxygenation with higher PEEP. Lago Borges 2014: shorter duration of ventilation with higher PEEP <sup>c</sup> .                                                                                                                                                               |
| Lesur                                          | 2010                   | ARF                                                              | 63               | No differences regarding incidence of hypotension, duration of ventilation and mortality <sup>d</sup> .                                                                                                                                                                                                               |
| Ma                                             | 2014                   | Brain injury with neurological pulmonary edema                   | 120              | Lower blood pressure, higher oxygenation and lower 28-day mortality with higher PEEP                                                                                                                                                                                                                                  |
| Manzano                                        | 2008                   | Nonhypoxemic patients (PaO <sub>2</sub> /FiO <sub>2</sub> > 250) | 127              | Lower incidence of VAP and hypoxemia with higher PEEP; no differences regarding development of ARDS, barotrauma, or atelectasis, and hospital mortality.                                                                                                                                                              |
| Marvel                                         | 1986                   | Post-cardiac surgery                                             | 44 <sup>e</sup>  | Better oxygenation with higher PEEP; no differences regarding atelectasis and hospital length of stay.                                                                                                                                                                                                                |
| Michalopoulos                                  | 1998                   | Post-cardiac surgery                                             | 67 <sup>f</sup>  | No differences regarding oxygenation, cardiac index, incidence of pneumothorax and atelectasis, duration of ventilation, and mortality                                                                                                                                                                                |
| Murphy                                         | 1983                   | Post-cardiac surgery                                             | 139              | No differences regarding blood loss and blood products or fluids administration                                                                                                                                                                                                                                       |
| Nelson                                         | 1987                   | Hypoxemic patients (PaO <sub>2</sub> /FiO <sub>2</sub> 144-244)  | 38               | No differences regarding barotrauma, duration of ventilation, length of stay, and mortality                                                                                                                                                                                                                           |
| Pepe                                           | 1984                   | ARF patients at risk of ARDS                                     | 92               | No differences regarding incidence of ARDS, barotrauma, atelectasis, hypotension, duration of ventilation, length of stay, and mortality                                                                                                                                                                              |
| Relax                                          | 2020                   | ARF patients expected not to be extubated within 24 hours        | 969              | No differences regarding 28-day ventilator free days, duration of ventilation, incidence of ARDS, VAP, pneumothorax, atelectasis, length of stay, and mortality.                                                                                                                                                      |
| Vigil                                          | 1996                   | Nonhypoxic patients after trauma                                 | 44               | No differences regarding shunt, dead space volume, and oxygenation after correction for baseline values                                                                                                                                                                                                               |
| Weigelt                                        | 1979                   | ARF patients at risk of ARDS                                     | 79               | Lower incidence of ARDS and pulmonary mortality and higher incidence of pulmonary dysfunction with higher PEEP                                                                                                                                                                                                        |

| <b>Table S2 (continued)</b>                                                                                                                                                                                                                                                                                                                                                                                                                                                                                                                                                                                                                                                                                                                                                                                                                                                                                                                                                                                                                                                                                                                                                                                                                                                                                                                                                                                                                                                                                                                                                                                                                                                                                                                                                                                   |             |                         |          |                                                                                                               |
|---------------------------------------------------------------------------------------------------------------------------------------------------------------------------------------------------------------------------------------------------------------------------------------------------------------------------------------------------------------------------------------------------------------------------------------------------------------------------------------------------------------------------------------------------------------------------------------------------------------------------------------------------------------------------------------------------------------------------------------------------------------------------------------------------------------------------------------------------------------------------------------------------------------------------------------------------------------------------------------------------------------------------------------------------------------------------------------------------------------------------------------------------------------------------------------------------------------------------------------------------------------------------------------------------------------------------------------------------------------------------------------------------------------------------------------------------------------------------------------------------------------------------------------------------------------------------------------------------------------------------------------------------------------------------------------------------------------------------------------------------------------------------------------------------------------|-------------|-------------------------|----------|---------------------------------------------------------------------------------------------------------------|
| <b>First author</b>                                                                                                                                                                                                                                                                                                                                                                                                                                                                                                                                                                                                                                                                                                                                                                                                                                                                                                                                                                                                                                                                                                                                                                                                                                                                                                                                                                                                                                                                                                                                                                                                                                                                                                                                                                                           | <b>Year</b> | <b>Type of patients</b> | <b>N</b> | <b>Main findings</b>                                                                                          |
| Zurick                                                                                                                                                                                                                                                                                                                                                                                                                                                                                                                                                                                                                                                                                                                                                                                                                                                                                                                                                                                                                                                                                                                                                                                                                                                                                                                                                                                                                                                                                                                                                                                                                                                                                                                                                                                                        | 1982        | Post-cardiac surgery    | 83       | No differences regarding postoperative blood loss, need for reexploration for bleeding, and blood requirement |
| <p>Abbreviations: N, total number of patients; PEEP, positive end-expiratory pressure; ARF, acute respiratory failure; MV, mechanical ventilation; ZEEP, zero end-expiratory pressure; ICU, intensive care unit; PaO<sub>2</sub>/FiO<sub>2</sub>, arterial partial pressure of oxygen to fraction of inspired oxygen ratio; VAP, ventilator-associated pneumonia; ARDS, acute respiratory distress syndrome.</p> <p>Twenty-two randomized controlled trials (2225 patients), which compared higher PEEP (1007 patients) to lower PEEP (991 patients), were included. The Murphy study did not report the number of patients that were randomized to the two groups and some study groups of the Lago Borges, Marvel, and Michalopoulos studies were excluded (see below); this explains why the total number of patients overall included in the studies does not match the sum of the patients in the two groups.</p> <p><sup>a</sup>The same patient population was included in Korovesi 2011 and Korovesi 2016.</p> <p><sup>b</sup>The same patient population was included in Lago Borges 2013 and Lago Borges 2014. One group of 47 patients with intermediate level of PEEP (8 cmH<sub>2</sub>O) was not included in this systematic review and meta-analysis.</p> <p><sup>c</sup>Only patients extubated within 12 h after ICU admission were considered by the authors of the original article.</p> <p><sup>d</sup>PEEP was maintained for the first 90 minutes after intubation only.</p> <p><sup>e</sup>One group of 17 patients, who exhaled to ambient pressure, was not included in this systematic review and meta-analysis.</p> <p><sup>f</sup>One group of 24 patients with intermediate level of PEEP (5 cmH<sub>2</sub>O) was not included in this systematic review and meta-analysis.</p> |             |                         |          |                                                                                                               |

| Table S3. Patients and ventilation settings |             |             |                       |                                                                           |                                 |                                   |                  |            |             |                       |                                              |                                 |                                   |                  |
|---------------------------------------------|-------------|-------------|-----------------------|---------------------------------------------------------------------------|---------------------------------|-----------------------------------|------------------|------------|-------------|-----------------------|----------------------------------------------|---------------------------------|-----------------------------------|------------------|
| First author                                | Higher PEEP |             |                       |                                                                           |                                 |                                   |                  | Lower PEEP |             |                       |                                              |                                 |                                   |                  |
|                                             | N           | Age (years) | Female gender (N [%]) | PEEP titration                                                            | PEEP level (cmH <sub>2</sub> O) | Tidal volume (mL/kg) <sup>a</sup> | Ventilatory mode | N          | Age (years) | Female gender (N [%]) | PEEP titration                               | PEEP level (cmH <sub>2</sub> O) | Tidal volume (mL/kg) <sup>a</sup> | Ventilatory mode |
| Collier                                     | 40          | 67 ± 11     | 9 (22)                | Arbitrarily                                                               | 10                              | 10                                | SIMV             | 44         | 65 ± 8      | 16 (36)               | Arbitrarily                                  | 5                               | 10                                | SIMV             |
| Dyhr                                        | 7           | 61 ± 24     | 0                     | 1 cmH <sub>2</sub> O above lower inflection point                         | 15                              | 6                                 | VCV <sup>b</sup> | 8          | 63 ± 22     | 3 (37)                | Arbitrarily                                  | 0                               | 6                                 | VCV <sup>b</sup> |
| Feeley                                      | 12          | 59 ± 22     | 7 (58)                | Arbitrarily                                                               | 5                               | 10                                | VCV              | 13         | 64 ± 10     | 7 (54)                | Arbitrarily                                  | 0                               | 10                                | VCV              |
| Good                                        | 10          | 51 ± 2      | n.a.                  | Maximum respiratory system compliance                                     | 6.3                             | 10-12                             | VCV              | 14         | 57 ± 2      | n.a.                  | Arbitrarily                                  | 0                               | 10-12                             | VCV              |
| Holland                                     | 14          | 63 ± 7      | 1 (7)                 | Arbitrarily                                                               | 10                              | 6-8                               | PCV              | 14         | 68 ± 11     | 6 (43)                | Arbitrarily                                  | 5                               | 6-8                               | PCV              |
| Korovesi <sup>c</sup>                       | 15          | 33 ± 29     | 3 (20)                | Arbitrarily                                                               | 8                               | 8                                 | VCV              | 12         | 23 ± 5      | 2 (17)                | Arbitrarily                                  | 0                               | 8                                 | VCV              |
| Koutsoukou                                  | 11          | 42 ± 19     | 2 (18)                | Arbitrarily                                                               | 8                               | 8                                 | VCV              | 10         | 40 ± 12     | 3 (30)                | Arbitrarily                                  | 0                               | 8                                 | VCV              |
| Lago Borges <sup>d</sup>                    | 45          | n.a.        | 10 (22)               | Arbitrarily                                                               | 10                              | 6-8                               | VCV              | 44         | n.a.        | 15 (34)               | Arbitrarily                                  | 5                               | 6-8                               | VCV              |
| Lesur                                       | 30          | 65 ± 14     | 13 (43)               | Arbitrarily                                                               | 5                               | 8                                 | VCV/PCV          | 33         | 64 ± 18     | 12 (36)               | Arbitrarily                                  | 0                               | 7                                 | VCV/PCV          |
| Ma                                          | 60          | n.a.        | n.a.                  | Arbitrarily                                                               | 11-30                           | 6-8                               | n.a.             | 60         | n.a.        | n.a.                  | Arbitrarily                                  | 3-10                            | 6-8                               | n.a.             |
| Manzano                                     | 64          | 44 ± 18     | 17 (26)               | Level of abdomen relative to level of chest                               | 5-8                             | 8                                 | n.a.             | 63         | 47 ± 19     | 20 (32)               | Arbitrarily                                  | 0                               | 8                                 | n.a.             |
| Marvel <sup>e</sup>                         | 12          | 56 ± 3      | n.a.                  | Arbitrarily                                                               | 10                              | 12                                | VCV              | 15         | 61 ± 3      | n.a.                  | Arbitrarily                                  | 5                               | 12                                | VCV              |
| Michalopoulos <sup>f</sup>                  | 21          | 62 ± 7      | 5 (24)                | Arbitrarily                                                               | 10                              | n.a.                              | ACV              | 22         | 61 ± 6      | 4 (18)                | Arbitrarily                                  | 0                               | n.a.                              | ACV              |
| Murphy                                      | n.a.        | n.a.        | n.a.                  | Arbitrarily                                                               | 10                              | n.a.                              | n.a.             | n.a.       | n.a.        | n.a.                  | Arbitrarily                                  | 0                               | n.a.                              | n.a.             |
| Nelson                                      | 20          | 53 ± 17     | n.a.                  | Incremental until PaO <sub>2</sub> /FiO <sub>2</sub> > 300 or shunt < 0.2 | 15                              | n.a.                              | IMV              | 18         | 55 ± 20     | n.a.                  | Incremental until PaO <sub>2</sub> > 65 mmHg | 8                               | n.a.                              | IMV              |
| Pepe                                        | 44          | 46 ± 19     | 14 (32)               | Arbitrarily                                                               | 8                               | 12                                | VCV              | 48         | 42 ± 19     | 12 (25)               | Arbitrarily                                  | 0                               | 12                                | VCV              |

| Table S3 (continued) |             |             |                       |                                        |                                 |                                   |                  |            |             |                       |                                                                        |                                 |                                   |                  |
|----------------------|-------------|-------------|-----------------------|----------------------------------------|---------------------------------|-----------------------------------|------------------|------------|-------------|-----------------------|------------------------------------------------------------------------|---------------------------------|-----------------------------------|------------------|
| First author         | Higher PEEP |             |                       |                                        |                                 |                                   |                  | Lower PEEP |             |                       |                                                                        |                                 |                                   |                  |
|                      | N           | Age (years) | Female gender (N [%]) | PEEP titration                         | PEEP level (cmH <sub>2</sub> O) | Tidal volume (mL/kg) <sup>a</sup> | Ventilatory mode | N          | Age (years) | Female gender (N [%]) | PEEP titration                                                         | PEEP level (cmH <sub>2</sub> O) | Tidal volume (mL/kg) <sup>a</sup> | Ventilatory mode |
| Relax                | 493         | 66 ± 13     | 182 (37)              | Clinical practice from The Netherlands | 8                               | 7                                 | VCV/PCV/PSV      | 476        | 65 ± 13     | 164 (34)              | Decremental until SpO <sub>2</sub> > 92% or PaO <sub>2</sub> > 60 mmHg | 2                               | 7                                 | VCV/PCV/PSV      |
| Vigil                | 23          | n.a.        | n.a.                  | Arbitrarily                            | 5                               | 12                                | n.a.             | 21         | n.a.        | n.a.                  | Arbitrarily                                                            | 0                               | 12                                | n.a.             |
| Weigelt              | 45          | Median 45   | 15 (33)               | Arbitrarily                            | 5                               | 15                                | n.a.             | 34         | Median 45   | 7 (21)                | Arbitrarily                                                            | 0                               | 15                                | n.a.             |
| Zurich               | 41          | 56 ± 8      | 4 (10)                | Arbitrarily                            | 10                              | n.a.                              | VCV              | 42         | 57 ± 8      | 8 (19)                | Arbitrarily                                                            | 0                               | n.a.                              | VCV/PVC          |

Data are reported as mean (± standard deviation) or number (%), as appropriate, unless otherwise specified.

Abbreviations: N, total number of patients; PEEP, positive end-expiratory pressure; SIMV, synchronized intermittent mandatory ventilation; VCV, volume-controlled ventilation; n.a., not available; PCV, pressure-controlled ventilation; ACV, assist control ventilation; PaO<sub>2</sub>/FiO<sub>2</sub>, arterial partial pressure of oxygen to fraction of inspired oxygen ratio; PaO<sub>2</sub>, arterial partial pressure of oxygen; IMV, intermittent mandatory ventilation; SpO<sub>2</sub>, pulse oximetry-measured oxygen saturation.

Twenty-two randomized controlled trials (2225 patients), which compared higher PEEP (1007 patients) to lower PEEP (991 patients), were included. The Murphy study did not report the number of patients that were randomized to the two groups and some study groups of the Lago Borges, Marvel, and Michalopoulos studies were excluded (see below); this explains why the total number of patients overall included in the studies does not match the sum of the patients in the two groups.

<sup>a</sup>Many authors did not specify whether the tidal volume was based on ideal body weight or actual body weight.

<sup>b</sup>This study was the only study including recruitment maneuvers in the ventilatory protocol.

<sup>c</sup>The same patient population was included in Korovesi 2011 and Korovesi 2016.

<sup>d</sup>The same patient population was included in Lago Borges 2013 and Lago Borges 2014. One group of 47 patients with intermediate level of PEEP 8 cmH<sub>2</sub>O was not included in this systematic review and meta-analysis.

<sup>e</sup>One group of 17 patients, who exhaled to ambient pressure, was not included in this systematic review and meta-analysis.

<sup>f</sup>One group of 24 patients with intermediate level of PEEP (5 cmH<sub>2</sub>O) was not included in this systematic review and meta-analysis.

| First author               | PaO <sub>2</sub> /FiO <sub>2</sub> (mmHg) | A-aDO <sub>2</sub> (mmHg) | Cr <sub>s</sub> (mL/cmH <sub>2</sub> O) | CI (L/min/m <sup>2</sup> ) | CVP (mmHg) | Hypoxemia (n [%]) | Pneumonia (n [%]) | Atelectasis (n [%]) | ARDS (n [%]) | Bleeding 24 h (mL) | PRB C (units) | Hypotension (n [%]) | Barotrauma (n [%]) | Duration of ventilation | Hospital stay (days) | ICU stay (days) | ICU mortality (n [%]) | 28-day mortality (n [%]) | Hospital mortality (n [%]) |
|----------------------------|-------------------------------------------|---------------------------|-----------------------------------------|----------------------------|------------|-------------------|-------------------|---------------------|--------------|--------------------|---------------|---------------------|--------------------|-------------------------|----------------------|-----------------|-----------------------|--------------------------|----------------------------|
| Collier                    |                                           |                           |                                         | 3.10 ± 0.86                |            |                   |                   |                     |              | 395 ± 392          | 0.8 ± 1.4     |                     |                    | 409 ± 209 min           | 5.2 ± 1.7            |                 |                       |                          | 1 (2%)                     |
| Dyhr                       |                                           |                           |                                         | 2.2 ± 0.6                  | 13 ± 11    |                   |                   |                     |              |                    |               |                     |                    |                         |                      |                 | 0 (0%)                |                          | 0 (0%)                     |
| Feeley                     |                                           | Increase of 10 ± 22       |                                         |                            |            |                   |                   |                     |              |                    |               | 0 (0%)              |                    | 258 ± 217 min           |                      |                 | 2 (17%)               |                          |                            |
| Good                       |                                           |                           |                                         |                            |            |                   |                   | 9 (90%)             |              |                    |               | 0 (0%)              | 0 (0%)             |                         |                      |                 |                       |                          |                            |
| Holland                    | 307 ± 82                                  |                           |                                         | 3.0 ± 0.6                  | 9 ± 3      |                   |                   |                     |              |                    |               |                     |                    |                         |                      |                 |                       |                          |                            |
| Korovesi <sup>a</sup>      | 498 ± 75                                  |                           |                                         |                            |            |                   |                   |                     | 0 (0%)       |                    |               |                     |                    |                         |                      |                 | 17.2 ± 10.1           | 3 (20%)                  |                            |
| Koutsoukou                 | 409 ± 65                                  | 100 ± 41                  | 62 ± 14                                 |                            |            |                   |                   |                     | 0 (0%)       |                    |               |                     |                    |                         |                      |                 |                       |                          |                            |
| Lago Borges <sup>b</sup>   | 328 ± 85                                  | 117 ± 33                  | 56 ± 19                                 |                            |            | 19 (42%)          |                   |                     |              |                    |               |                     |                    | 5.1 ± 2.9 hours         |                      |                 |                       |                          |                            |
| Lesur                      | 293 ± 135                                 |                           |                                         |                            | 12 ± 1     |                   |                   |                     |              |                    |               |                     |                    | 9.2 ± 8.8 days          |                      |                 |                       | 9 (30%)                  | 12 (40%)                   |
| Ma                         | 196 ± 45                                  |                           |                                         |                            |            |                   |                   |                     |              |                    |               |                     |                    |                         |                      |                 |                       | 15 (25%)                 |                            |
| Manzano <sup>c</sup>       | 359 ± 104                                 |                           |                                         |                            |            | 12 (19%)          | 6 (9%)            | 12 (19%)            | 3 (5%)       |                    |               |                     | 1 (%)              | 5.8 ± 6.8 days          | 19.5 ± 18.2          | 10.5 ± 9.8      |                       |                          | 19 (30%)                   |
| Marvel <sup>d</sup>        |                                           | 168 ± 10                  |                                         |                            |            |                   |                   |                     |              |                    |               |                     |                    | 9.3 ± 0.6 hours         | 8.8 ± 0.5            |                 |                       |                          |                            |
| Michalopoulos <sup>e</sup> | 315                                       |                           |                                         | 3                          |            |                   |                   | 2 (9%)              |              |                    |               |                     | 0 (0%)             |                         |                      |                 |                       |                          | 0 (0%)                     |
| Nelson                     |                                           |                           |                                         |                            |            |                   |                   |                     |              |                    |               |                     | 1 (5%)             | 5.3 ± 5.0 days          | 28 ± 24              | 6.6 ± 5.0       | 4 (20%)               |                          | 5 (25%)                    |
| Pepe                       |                                           |                           |                                         |                            |            | 1 (2%)            | 4 (9%)            | 27 (61%)            | 11 (25%)     |                    |               | 1 (2%)              | 19 (43%)           |                         |                      |                 |                       |                          | 13 (30%)                   |



| Table S4 (continued) |                                           |                           |                             |                            |            |                   |                   |                     |              |                    |              |                     |                    |                         |                      |                 |                       |                          |                            |
|----------------------|-------------------------------------------|---------------------------|-----------------------------|----------------------------|------------|-------------------|-------------------|---------------------|--------------|--------------------|--------------|---------------------|--------------------|-------------------------|----------------------|-----------------|-----------------------|--------------------------|----------------------------|
| First author         | PaO <sub>2</sub> /FiO <sub>2</sub> (mmHg) | A-aDO <sub>2</sub> (mmHg) | Crs (mL/cmH <sub>2</sub> O) | CI (L/min/m <sup>2</sup> ) | CVP (mmHg) | Hypoxemia (n [%]) | Pneumonia (n [%]) | Atelectasis (n [%]) | ARDS (n [%]) | Bleeding 24 h (mL) | PRBC (units) | Hypotension (n [%]) | Barotrauma (n [%]) | Duration of ventilation | Hospital stay (days) | ICU stay (days) | ICU mortality (n [%]) | 28-day mortality (n [%]) | Hospital mortality (n [%]) |
| Relax <sup>f</sup>   | 248 ± 112                                 |                           |                             |                            |            | 87 (18%)          | 7 (1%)            | 15 (3%)             | 5 (1%)       |                    | 1.7 ± 0.7    |                     | 12 (2%)            | 4.8 ± 6.6 days          | 19 ± 21              | 7.2 ± 10.3      | 185 (38%)             | 207 (50%)                | 208 (42%)                  |
| Vigil                |                                           |                           |                             |                            |            |                   |                   |                     |              |                    |              |                     |                    | 3.2 days                |                      |                 |                       |                          |                            |
| Weigelt              |                                           |                           | 42 ± 36                     |                            |            |                   |                   |                     | 9 (20%)      |                    |              | 1 (2%)              | 5 (11%)            | 9.3 ± 13 days           |                      | 11.7 ± 16.8     |                       |                          | 16 (35%)                   |
| Zurich               |                                           |                           |                             |                            |            |                   |                   |                     |              | 542 ± 239          | 0.33 ± 0.87  |                     |                    |                         |                      |                 |                       |                          |                            |

Data are reported as mean (± standard deviation) or number (%), as appropriate, unless otherwise specified. Empty cells are due to not available data; no data were available for the Murphy study.

Abbreviations: PEEP, positive end-expiratory pressure; PaO<sub>2</sub>/FiO<sub>2</sub>, arterial partial pressure of oxygen to fraction of inspired oxygen ratio; A-aDO<sub>2</sub>, alveolar-arterial oxygen pressure difference; Crs, respiratory system compliance; CI, cardiac index; CVP, central venous pressure; ARDS, acute respiratory distress syndrome; bleeding 24 h, bleeding 24 hours after the surgery; PRBC, packed red blood cells; ICU, intensive care unit.

Quantitative variables are expressed as mean ± standard deviations (only mean in Michalopoulos and Vigil), qualitative variables as number (percentage).

<sup>a</sup>The same patient population was included in Korovesi 2011 and Korovesi 2016. Variables included in the table are the variables collected at day 3 in the original study.

<sup>b</sup>The same patient population was included in Lago Borges 2013 and Lago Borges 2014. One group of 47 patients with intermediate level of PEEP 8 cmH<sub>2</sub>O was not included in this systematic review and meta-analysis.

<sup>c</sup>Variables included in the table are the variables collected at day 2 in the original study.

<sup>d</sup>One group of 17 patients, who exhaled to ambient pressure, was not included in this systematic review and meta-analysis.

<sup>e</sup>One group of 24 patients with intermediate level of PEEP (5 cmH<sub>2</sub>O) was not included in this systematic review and meta-analysis. Variables included in the table are the variables collected before the extubation in the original study.

<sup>f</sup>Variables included in the table are the variables collected at day 3 in the original study.

| <b>First author</b>        | <b>PaO<sub>2</sub>/FiO<sub>2</sub> (mmHg)</b> | <b>A-aDO<sub>2</sub> (mmHg)</b> | <b>Cr<sub>s</sub> (mL/cmH<sub>2</sub>O)</b> | <b>CI (L/min/m<sup>2</sup>)</b> | <b>CVP (mmHg)</b> | <b>Hypoxemia (n [%])</b> | <b>Pneumonia (n [%])</b> | <b>Atelectasis (n [%])</b> | <b>ARDS (n [%])</b> | <b>Bleeding 24 h (mL)</b> | <b>PRB C (units)</b> | <b>Hypotension (n [%])</b> | <b>Barotrauma (n [%])</b> | <b>Duration of ventilation</b> | <b>Hospital stay (days)</b> | <b>ICU stay (days)</b> | <b>ICU mortality (n [%])</b> | <b>28-day mortality (n [%])</b> | <b>Hospital mortality (n [%])</b> |
|----------------------------|-----------------------------------------------|---------------------------------|---------------------------------------------|---------------------------------|-------------------|--------------------------|--------------------------|----------------------------|---------------------|---------------------------|----------------------|----------------------------|---------------------------|--------------------------------|-----------------------------|------------------------|------------------------------|---------------------------------|-----------------------------------|
| Collier                    |                                               |                                 |                                             | 3.10 ± 0.64                     |                   |                          |                          |                            |                     | 587 ± 392                 | 1.1 ± 1.6            |                            |                           | 440 ± 278 min                  | 5.7 ± 2.5                   |                        |                              |                                 | 1 (2%)                            |
| Dyhr                       |                                               |                                 |                                             | 2.1 ± 1.1                       | 10 ± 7            |                          |                          |                            |                     |                           |                      |                            |                           |                                |                             |                        | 0 (0%)                       |                                 | 0 (0%)                            |
| Feeley                     |                                               | Increase of 102 ± 35            |                                             |                                 |                   |                          |                          |                            |                     |                           |                      | 0 (0%)                     |                           | 259 ± 149 min                  |                             |                        | 1 (8%)                       |                                 |                                   |
| Good                       |                                               |                                 |                                             |                                 |                   |                          |                          | 12 (86%)                   |                     |                           |                      | 0 (0%)                     | 0 (0%)                    |                                |                             |                        |                              |                                 |                                   |
| Holland                    | 337 ± 82                                      |                                 |                                             | 2.9 ± 0.6                       | 9 ± 3             |                          |                          |                            |                     |                           |                      |                            |                           |                                |                             |                        |                              |                                 |                                   |
| Korovesi <sup>a</sup>      | 420 ± 73                                      |                                 |                                             |                                 |                   |                          |                          |                            | 0 (0%)              |                           |                      |                            |                           |                                |                             |                        | 14.40 ± 8.44                 | 4 (33%)                         |                                   |
| Koutsoukou                 | 437 ± 74                                      | 87 ± 40                         | 53 ± 11                                     |                                 |                   |                          |                          |                            | 1 (10%)             |                           |                      |                            |                           |                                |                             |                        |                              |                                 |                                   |
| Lago Borges <sup>b</sup>   | 270 ± 90                                      | 139 ± 34                        | 47 ± 12                                     |                                 |                   | 30 (68%)                 |                          |                            |                     |                           |                      |                            |                           | 6.8 ± 3.2 hours                |                             |                        |                              |                                 |                                   |
| Lesur                      | 228 ± 67                                      |                                 |                                             |                                 | 11 ± 3            |                          |                          |                            |                     |                           |                      |                            |                           | 9.2 ± 8.5 days                 |                             |                        |                              | 14 (42%)                        | 16 (48%)                          |
| Ma                         | 134 ± 22                                      |                                 |                                             |                                 |                   |                          |                          |                            |                     |                           |                      |                            |                           |                                |                             |                        |                              | 39 (65%)                        |                                   |
| Manzano <sup>c</sup>       | 301 ± 84                                      |                                 |                                             |                                 |                   | 34 (54%)                 | 16 (25%)                 | 17 (27%)                   | 9 (14%)             |                           |                      |                            | 5 (8%)                    | 6.5 ± 6.2 days                 | 26.3 ± 22.0                 | 12.3 ± 11.4            |                              |                                 | 16 (25%)                          |
| Marvel <sup>d</sup>        |                                               | 224 ± 12                        |                                             |                                 |                   |                          |                          |                            |                     |                           |                      |                            |                           | 11.1 ± 1.3 hours               | 8.9 ± 0.4                   |                        |                              |                                 |                                   |
| Michalopoulos <sup>e</sup> | 325                                           |                                 |                                             | 3.2                             |                   |                          |                          | 2 (9%)                     |                     |                           |                      |                            | 0 (0%)                    |                                |                             |                        |                              |                                 | 0 (0%)                            |
| Nelson                     |                                               |                                 |                                             |                                 |                   |                          |                          |                            |                     |                           |                      |                            | 0 (0%)                    | 3.4 ± 3.0 days                 | 26 ± 24                     | 5.3 ± 3.0              | 4 (22%)                      |                                 | 6 (33%)                           |
| Pepe                       |                                               |                                 |                                             |                                 |                   | 4 (8%)                   | 6 (12%)                  | 23 (48%)                   | 13 (27%)            |                           |                      | 0 (0%)                     | 24 (50%)                  |                                |                             |                        |                              |                                 | 18 (37%)                          |

**Table S5 (continued)**

| First author       | PaO <sub>2</sub> /FiO <sub>2</sub> (mmHg) | A-aDO <sub>2</sub> (mmHg) | Crs (mL/cmH <sub>2</sub> O) | CI (L/min/m <sup>2</sup> ) | CVP (mmHg) | Hypoxemia (n [%]) | Pneumonia (n [%]) | Atelectasis (n [%]) | ARDS (n [%]) | Bleeding 24 h (mL) | PRBC (units) | Hypotension (n [%]) | Barotrauma (n [%]) | Duration of ventilation | Hospital stay (days) | ICU stay (days) | ICU mortality (n [%]) | 28-day mortality (n [%]) | Hospital mortality (n [%]) |  |
|--------------------|-------------------------------------------|---------------------------|-----------------------------|----------------------------|------------|-------------------|-------------------|---------------------|--------------|--------------------|--------------|---------------------|--------------------|-------------------------|----------------------|-----------------|-----------------------|--------------------------|----------------------------|--|
| Relax <sup>f</sup> | 190 ± 84                                  |                           |                             |                            |            | 98 (21%)          | 6 (1%)            | 20 (4%)             | 13 (3%)      |                    | 1 ± 0        |                     | 19 (4%)            | 5.5 ± 7.4 days          | 19.9 ± 22.1          | 8.1 ± 11.5      | 163 (34%)             | 183 (38%)                | 185 (39%)                  |  |
| Vigil              |                                           |                           |                             |                            |            |                   |                   |                     |              |                    |              |                     |                    | 3.6 days                |                      |                 |                       |                          |                            |  |
| Weigelt            |                                           |                           | 39 ± 43                     |                            |            |                   |                   |                     | 18 (53%)     |                    |              | 0 (0%)              | 4 (12%)            | 14.0 ± 21.7 days        |                      | 21.0 ± 32.5     |                       |                          | 17 (50%)                   |  |
| Zurich             |                                           |                           |                             |                            |            |                   |                   |                     |              | 562 ± 261          | 0.75 ± 1.42  |                     |                    |                         |                      |                 |                       |                          |                            |  |

Data are reported as mean (± standard deviation) or number (%), as appropriate, unless otherwise specified. Empty cells are due to not available data; no data were available for the Murphy study. Abbreviations: PEEP, positive end-expiratory pressure; PaO<sub>2</sub>/FiO<sub>2</sub>, arterial partial pressure of oxygen to fraction of inspired oxygen ratio; A-aDO<sub>2</sub>, alveolar-arterial oxygen pressure difference; Crs, respiratory system compliance; CI, cardiac index; CVP, central venous pressure; ARDS, acute respiratory distress syndrome; bleeding 24 h, bleeding 24 hours after the surgery; PRBC, packed red blood cells; ICU, intensive care unit.

Quantitative variables are expressed as mean ± standard deviations (only mean in Michalopoulos and Vigil), qualitative variables as number (percentage).

<sup>a</sup>The same patient population was included in Korovesi 2011 and Korovesi 2016. Variables included in the table are the variables collected at day 3 in the original study.

<sup>b</sup>The same patient population was included in Lago Borges 2013 and Lago Borges 2014. One group of 47 patients with intermediate level of PEEP 8 cmH<sub>2</sub>O was not included in this systematic review and meta-analysis.

<sup>c</sup>Variables included in the table are the variables collected at day 2 in the original study.

<sup>d</sup>One group of 17 patients, who exhaled to ambient pressure, was not included in this systematic review and meta-analysis.

<sup>e</sup>One group of 24 patients with intermediate level of PEEP (5 cmH<sub>2</sub>O) was not included in this systematic review and meta-analysis. Variables included in the table are the variables collected before the extubation in the original study.

<sup>f</sup>Variables included in the table are the variables collected at day 3 in the original study.

**Online Resource 5. Risk of Bias Assessment**

| <b>Table S6. Risk of bias summary</b> |                              |                                               |                             |                                   |                                         |                             |
|---------------------------------------|------------------------------|-----------------------------------------------|-----------------------------|-----------------------------------|-----------------------------------------|-----------------------------|
| <b>Study</b>                          | <b>Randomization process</b> | <b>Deviations from intended interventions</b> | <b>Missing outcome data</b> | <b>Measurement of the outcome</b> | <b>Selection of the reported result</b> | <b>Overall risk of bias</b> |
| Collier 2002                          | Low                          | Low                                           | Low                         | Some concerns                     | Some concerns                           | Some concerns               |
| Dyhr 2002                             | Some concerns                | Some concerns                                 | Low                         | High                              | Low                                     | High                        |
| Feeley 1975                           | High                         | Some concerns                                 | Low                         | High                              | Some concerns                           | High                        |
| Good 1979                             | High                         | Some concerns                                 | Low                         | High                              | Some concerns                           | High                        |
| Holland 2007                          | Some concerns                | Some concerns                                 | Low                         | Low                               | Low                                     | Some concerns               |
| Korovesi 2011                         | Some concerns                | Some concerns                                 | Low                         | Some concerns                     | Low                                     | Some concerns               |
| Korovesi 2016                         | High                         | Some concerns                                 | Low                         | Some concerns                     | Low                                     | High                        |
| Koutsoukou 2006                       | High                         | Some concerns                                 | Low                         | Some concerns                     | Some concerns                           | High                        |
| Lago Borges 2013                      | High                         | Some concerns                                 | Low                         | High                              | High                                    | High                        |
| Lago Borges 2014                      | High                         | Some concerns                                 | Low                         | High                              | High                                    | High                        |
| Lesur 2010                            | Low                          | Low                                           | Low                         | Some concerns                     | Low                                     | Some concerns               |
| Ma 2014                               | Some concerns                | Low                                           | Low                         | Some concerns                     | Some concerns                           | Some concerns               |
| Manzano 2008                          | Low                          | Some concerns                                 | Low                         | Some concerns                     | Low                                     | Some concerns               |
| Marvel 1986                           | Some concerns                | Some concerns                                 | Low                         | High                              | Low                                     | High                        |
| Michalopoulos 1998                    | High                         | Some concerns                                 | Low                         | High                              | Low                                     | High                        |
| Murphy 1983                           | High                         | High                                          | High                        | High                              | Some concerns                           | High                        |
| Nelson 1987                           | High                         | Some concerns                                 | Low                         | High                              | Low                                     | High                        |
| Pepe 1984                             | Some concerns                | Some concerns                                 | Low                         | High                              | Low                                     | High                        |
| Relax 2020                            | Low                          | Low                                           | Low                         | Some concerns                     | Low                                     | Some concerns               |
| Vigil 1996                            | Some concerns                | High                                          | Low                         | High                              | Low                                     | High                        |
| Weigelt 1979                          | High                         | Some concerns                                 | Low                         | High                              | Some concerns                           | High                        |
| Zurich 1982                           | High                         | Some concerns                                 | Low                         | High                              | Low                                     | High                        |

**Fig. S1. Risk of bias summary**

A summary figure of review authors' judgements for each risk of bias item for each study.

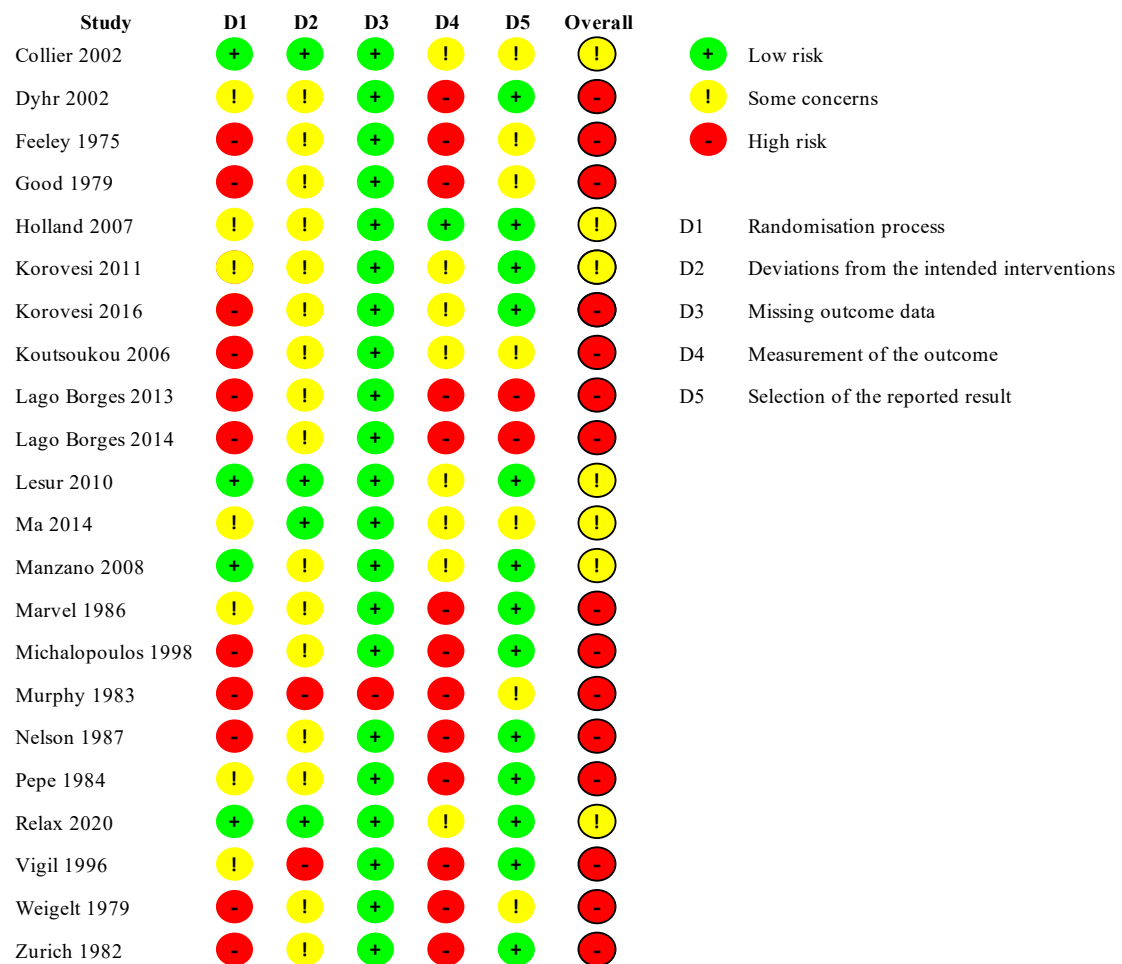

**Fig. S2. Risk of bias graph**

A plot of the distribution of review authors' judgements across studies for each risk of bias item.

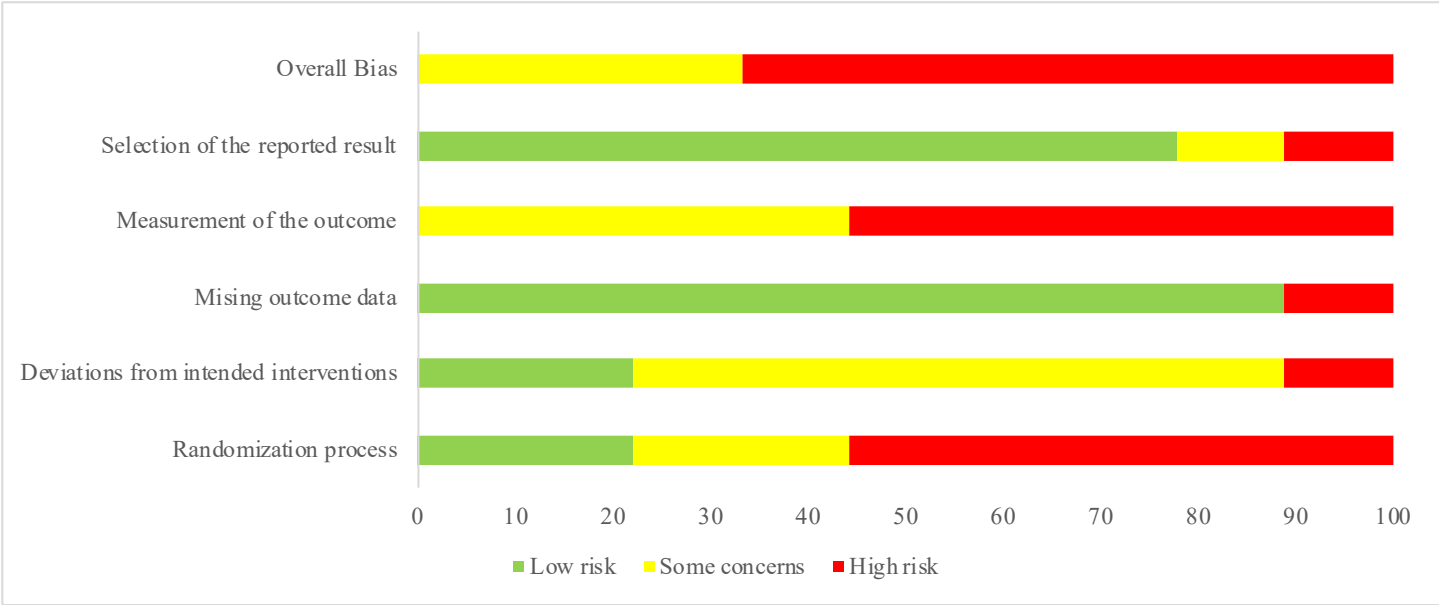

| <b>Table S7. Risk of bias for each study with signaling questions</b> |                                                                                                                                     |                 |                                                                                                                                                                                                                                                                                                                                                               |
|-----------------------------------------------------------------------|-------------------------------------------------------------------------------------------------------------------------------------|-----------------|---------------------------------------------------------------------------------------------------------------------------------------------------------------------------------------------------------------------------------------------------------------------------------------------------------------------------------------------------------------|
| <b>Study</b>                                                          | Collier 2002                                                                                                                        |                 |                                                                                                                                                                                                                                                                                                                                                               |
| <b>Domain</b>                                                         | <b>Signalling question</b>                                                                                                          | <b>Response</b> | <b>Comments</b>                                                                                                                                                                                                                                                                                                                                               |
| <b>Bias arising from the randomization process</b>                    | 1.1 Was the allocation sequence random?                                                                                             | Y               | “The study design was a prospective, randomized clinical trial. Consecutive patients were randomized to either a PEEP of 10 cm of H <sub>2</sub> O (experimental group) or a PEEP of 5 cm of H <sub>2</sub> O (control group). Sealed envelopes arranged in a computer-generated random order were opened sequentially to determine the patients’ treatment.” |
|                                                                       | 1.2 Was the allocation sequence concealed until participants were enrolled and assigned to interventions?                           | PY              |                                                                                                                                                                                                                                                                                                                                                               |
|                                                                       | 1.3 Did baseline differences between intervention groups suggest a problem with the randomization process?                          | N               |                                                                                                                                                                                                                                                                                                                                                               |
|                                                                       | <b>Risk of bias judgement</b>                                                                                                       | <b>Low</b>      |                                                                                                                                                                                                                                                                                                                                                               |
| <b>Bias due to deviations from intended interventions</b>             | 2.1. Were participants aware of their assigned intervention during the trial?                                                       | PN              |                                                                                                                                                                                                                                                                                                                                                               |
|                                                                       | 2.2. Were carers and people delivering the interventions aware of participants' assigned intervention during the trial?             | NI              |                                                                                                                                                                                                                                                                                                                                                               |
|                                                                       | 2.3. If Y/PY/NI to 2.1 or 2.2: Were there deviations from the intended intervention that arose because of the experimental context? | N               |                                                                                                                                                                                                                                                                                                                                                               |
|                                                                       | 2.4 If Y/PY to 2.3: Were these deviations likely to have affected the outcome?                                                      | NA              |                                                                                                                                                                                                                                                                                                                                                               |
|                                                                       | 2.5. If Y/PY/NI to 2.4: Were these deviations from intended intervention balanced between groups?                                   | NA              |                                                                                                                                                                                                                                                                                                                                                               |
|                                                                       | 2.6 Was an appropriate analysis used to estimate the effect of assignment to intervention?                                          | Y               |                                                                                                                                                                                                                                                                                                                                                               |

|                                                 |                                                                                                                                                                                     |                      |  |
|-------------------------------------------------|-------------------------------------------------------------------------------------------------------------------------------------------------------------------------------------|----------------------|--|
|                                                 | 2.7 If N/PN/NI to 2.6: Was there potential for a substantial impact (on the result) of the failure to analyse participants in the group to which they were randomized?              | NA                   |  |
|                                                 | <b>Risk of bias judgement</b>                                                                                                                                                       | <b>Low</b>           |  |
| <b>Bias due to missing outcome data</b>         | 3.1 Were data for this outcome available for all, or nearly all, participants randomized?                                                                                           | Y                    |  |
|                                                 | 3.2 If N/PN/NI to 3.1: Is there evidence that result was not biased by missing outcome data?                                                                                        | NA                   |  |
|                                                 | 3.3 If N/PN to 3.2: Could missingness in the outcome depend on its true value?                                                                                                      | NA                   |  |
|                                                 | 3.4 If Y/PY/NI to 3.3: Is it likely that missingness in the outcome depended on its true value?                                                                                     | NA                   |  |
|                                                 | <b>Risk of bias judgement</b>                                                                                                                                                       | <b>Low</b>           |  |
| <b>Bias in measurement of the outcome</b>       | 4.1 Was the method of measuring the outcome inappropriate?                                                                                                                          | N                    |  |
|                                                 | 4.2 Could measurement or ascertainment of the outcome have differed between intervention groups?                                                                                    | N                    |  |
|                                                 | 4.3 Were outcome assessors aware of the intervention received by study participants?                                                                                                | NI                   |  |
|                                                 | 4.4 If Y/PY/NI to 4.3: Could assessment of the outcome have been influenced by knowledge of intervention received?                                                                  | NI                   |  |
|                                                 | 4.5 If Y/PY/NI to 4.4: Is it likely that assessment of the outcome was influenced by knowledge of intervention received?                                                            | PN                   |  |
|                                                 | <b>Risk of bias judgement</b>                                                                                                                                                       | <b>Some concerns</b> |  |
| <b>Bias in selection of the reported result</b> | 5.1 Were the data that produced this result analysed in accordance with a pre-specified analysis plan that was finalized before unblinded outcome data were available for analysis? | NI                   |  |
|                                                 | 5.2 ... multiple eligible outcome measurements (e.g. scales, definitions, time points) within the outcome domain?                                                                   | PN                   |  |



|                             |                                                 |                      |  |
|-----------------------------|-------------------------------------------------|----------------------|--|
|                             | 5.3 ... multiple eligible analyses of the data? | PN                   |  |
|                             | <b>Risk of bias judgement</b>                   | <b>Some concerns</b> |  |
| <b>Overall risk of bias</b> | <b>Risk of bias judgement</b>                   | <b>Some concerns</b> |  |

|                                                           |                                                                                                                                     |                      |                                                                                                                                                        |
|-----------------------------------------------------------|-------------------------------------------------------------------------------------------------------------------------------------|----------------------|--------------------------------------------------------------------------------------------------------------------------------------------------------|
| <b>Study</b>                                              | Dyhr 2002                                                                                                                           |                      |                                                                                                                                                        |
| <b>Domain</b>                                             | <b>Signalling question</b>                                                                                                          | <b>Response</b>      | <b>Comments</b>                                                                                                                                        |
| <b>Bias arising from the randomization process</b>        | 1.1 Was the allocation sequence random?                                                                                             | PY                   | “At arrival after surgery in the intensive care unit (ICU) the patients were assigned randomly, using the sealed envelope technique, into two groups”. |
|                                                           | 1.2 Was the allocation sequence concealed until participants were enrolled and assigned to interventions?                           | NI                   |                                                                                                                                                        |
|                                                           | 1.3 Did baseline differences between intervention groups suggest a problem with the randomization process?                          | N                    |                                                                                                                                                        |
|                                                           | <b>Risk of bias judgement</b>                                                                                                       | <b>Some concerns</b> |                                                                                                                                                        |
| <b>Bias due to deviations from intended interventions</b> | 2.1. Were participants aware of their assigned intervention during the trial?                                                       | PN                   |                                                                                                                                                        |
|                                                           | 2.2. Were carers and people delivering the interventions aware of participants' assigned intervention during the trial?             | PY                   |                                                                                                                                                        |
|                                                           | 2.3. If Y/PY/NI to 2.1 or 2.2: Were there deviations from the intended intervention that arose because of the experimental context? | NI                   |                                                                                                                                                        |
|                                                           | 2.4 If Y/PY to 2.3: Were these deviations likely to have affected the outcome?                                                      | NA                   |                                                                                                                                                        |
|                                                           | 2.5. If Y/PY/NI to 2.4: Were these deviations from intended intervention balanced between groups?                                   | NA                   |                                                                                                                                                        |

|                                                 |                                                                                                                                                                                     |                      |  |
|-------------------------------------------------|-------------------------------------------------------------------------------------------------------------------------------------------------------------------------------------|----------------------|--|
|                                                 | 2.6 Was an appropriate analysis used to estimate the effect of assignment to intervention?                                                                                          | Y                    |  |
|                                                 | 2.7 If N/PN/NI to 2.6: Was there potential for a substantial impact (on the result) of the failure to analyse participants in the group to which they were randomized?              | NA                   |  |
|                                                 | <b>Risk of bias judgement</b>                                                                                                                                                       | <b>Some concerns</b> |  |
| <b>Bias due to missing outcome data</b>         | 3.1 Were data for this outcome available for all, or nearly all, participants randomized?                                                                                           | Y                    |  |
|                                                 | 3.2 If N/PN/NI to 3.1: Is there evidence that result was not biased by missing outcome data?                                                                                        | NA                   |  |
|                                                 | 3.3 If N/PN to 3.2: Could missingness in the outcome depend on its true value?                                                                                                      | NA                   |  |
|                                                 | 3.4 If Y/PY/NI to 3.3: Is it likely that missingness in the outcome depended on its true value?                                                                                     | NA                   |  |
|                                                 | <b>Risk of bias judgement</b>                                                                                                                                                       | <b>Low</b>           |  |
| <b>Bias in measurement of the outcome</b>       | 4.1 Was the method of measuring the outcome inappropriate?                                                                                                                          | N                    |  |
|                                                 | 4.2 Could measurement or ascertainment of the outcome have differed between intervention groups?                                                                                    | PY                   |  |
|                                                 | 4.3 Were outcome assessors aware of the intervention received by study participants?                                                                                                | NA                   |  |
|                                                 | 4.4 If Y/PY/NI to 4.3: Could assessment of the outcome have been influenced by knowledge of intervention received?                                                                  | NA                   |  |
|                                                 | 4.5 If Y/PY/NI to 4.4: Is it likely that assessment of the outcome was influenced by knowledge of intervention received?                                                            | NA                   |  |
|                                                 | <b>Risk of bias judgement</b>                                                                                                                                                       | <b>High</b>          |  |
| <b>Bias in selection of the reported result</b> | 5.1 Were the data that produced this result analysed in accordance with a pre-specified analysis plan that was finalized before unblinded outcome data were available for analysis? | PY                   |  |

|                             |                                                                                                                   |             |  |
|-----------------------------|-------------------------------------------------------------------------------------------------------------------|-------------|--|
|                             | 5.2 ... multiple eligible outcome measurements (e.g. scales, definitions, time points) within the outcome domain? | PN          |  |
|                             | 5.3 ... multiple eligible analyses of the data?                                                                   | PN          |  |
|                             | <b>Risk of bias judgement</b>                                                                                     | <b>Low</b>  |  |
| <b>Overall risk of bias</b> | <b>Risk of bias judgement</b>                                                                                     | <b>High</b> |  |

|                                                           |                                                                                                                                     |                 |                                                                                                                                                                        |
|-----------------------------------------------------------|-------------------------------------------------------------------------------------------------------------------------------------|-----------------|------------------------------------------------------------------------------------------------------------------------------------------------------------------------|
| <b>Study</b>                                              | Feeley 1975                                                                                                                         |                 |                                                                                                                                                                        |
| <b>Domain</b>                                             | <b>Signalling question</b>                                                                                                          | <b>Response</b> | <b>Comments</b>                                                                                                                                                        |
| <b>Bias arising from the randomization process</b>        | 1.1 Was the allocation sequence random?                                                                                             | NI              | “Patients selected for study were assigned randomly to receive either 5 cm of positive end-expiratory pressure or no positive end-expiratory pressure during weaning.” |
|                                                           | 1.2 Was the allocation sequence concealed until participants were enrolled and assigned to interventions?                           | PN              |                                                                                                                                                                        |
|                                                           | 1.3 Did baseline differences between intervention groups suggest a problem with the randomization process?                          | N               |                                                                                                                                                                        |
|                                                           | <b>Risk of bias judgement</b>                                                                                                       | <b>High</b>     |                                                                                                                                                                        |
| <b>Bias due to deviations from intended interventions</b> | 2.1. Were participants aware of their assigned intervention during the trial?                                                       | PN              |                                                                                                                                                                        |
|                                                           | 2.2. Were carers and people delivering the interventions aware of participants' assigned intervention during the trial?             | NI              |                                                                                                                                                                        |
|                                                           | 2.3. If Y/PY/NI to 2.1 or 2.2: Were there deviations from the intended intervention that arose because of the experimental context? | NI              |                                                                                                                                                                        |

|                                           |                                                                                                                                                                        |                      |  |
|-------------------------------------------|------------------------------------------------------------------------------------------------------------------------------------------------------------------------|----------------------|--|
|                                           | 2.4 If Y/PY to 2.3: Were these deviations likely to have affected the outcome?                                                                                         | NA                   |  |
|                                           | 2.5. If Y/PY/NI to 2.4: Were these deviations from intended intervention balanced between groups?                                                                      | NA                   |  |
|                                           | 2.6 Was an appropriate analysis used to estimate the effect of assignment to intervention?                                                                             | PY                   |  |
|                                           | 2.7 If N/PN/NI to 2.6: Was there potential for a substantial impact (on the result) of the failure to analyse participants in the group to which they were randomized? | NA                   |  |
|                                           | <b>Risk of bias judgement</b>                                                                                                                                          | <b>Some concerns</b> |  |
| <b>Bias due to missing outcome data</b>   | 3.1 Were data for this outcome available for all, or nearly all, participants randomized?                                                                              | Y                    |  |
|                                           | 3.2 If N/PN/NI to 3.1: Is there evidence that result was not biased by missing outcome data?                                                                           | NA                   |  |
|                                           | 3.3 If N/PN to 3.2: Could missingness in the outcome depend on its true value?                                                                                         | NA                   |  |
|                                           | 3.4 If Y/PY/NI to 3.3: Is it likely that missingness in the outcome depended on its true value?                                                                        | NA                   |  |
|                                           | <b>Risk of bias judgement</b>                                                                                                                                          | <b>Low</b>           |  |
| <b>Bias in measurement of the outcome</b> | 4.1 Was the method of measuring the outcome inappropriate?                                                                                                             | PN                   |  |
|                                           | 4.2 Could measurement or ascertainment of the outcome have differed between intervention groups?                                                                       | PY                   |  |
|                                           | 4.3 Were outcome assessors aware of the intervention received by study participants?                                                                                   | NA                   |  |
|                                           | 4.4 If Y/PY/NI to 4.3: Could assessment of the outcome have been influenced by knowledge of intervention received?                                                     | NA                   |  |
|                                           | 4.5 If Y/PY/NI to 4.4: Is it likely that assessment of the outcome was influenced by knowledge of intervention received?                                               | NA                   |  |

|                                                 |                                                                                                                                                                                     |                      |  |
|-------------------------------------------------|-------------------------------------------------------------------------------------------------------------------------------------------------------------------------------------|----------------------|--|
|                                                 | <b>Risk of bias judgement</b>                                                                                                                                                       | <b>High</b>          |  |
| <b>Bias in selection of the reported result</b> | 5.1 Were the data that produced this result analysed in accordance with a pre-specified analysis plan that was finalized before unblinded outcome data were available for analysis? | NI                   |  |
|                                                 | 5.2 ... multiple eligible outcome measurements (e.g. scales, definitions, time points) within the outcome domain?                                                                   | PN                   |  |
|                                                 | 5.3 ... multiple eligible analyses of the data?                                                                                                                                     | PN                   |  |
|                                                 | <b>Risk of bias judgement</b>                                                                                                                                                       | <b>Some concerns</b> |  |
| <b>Overall risk of bias</b>                     | <b>Risk of bias judgement</b>                                                                                                                                                       | <b>High</b>          |  |

|                                                           |                                                                                                            |                 |                                                                                                                                   |
|-----------------------------------------------------------|------------------------------------------------------------------------------------------------------------|-----------------|-----------------------------------------------------------------------------------------------------------------------------------|
| <b>Study</b>                                              | Good 1979                                                                                                  |                 |                                                                                                                                   |
| <b>Domain</b>                                             | <b>Signalling question</b>                                                                                 | <b>Response</b> | <b>Comments</b>                                                                                                                   |
| <b>Bias arising from the randomization process</b>        | 1.1 Was the allocation sequence random?                                                                    | NI              | “Patients were randomly assigned to a group receiving therapy with PEEP (ten patients) or to a group with no PEEP (14 patients).” |
|                                                           | 1.2 Was the allocation sequence concealed until participants were enrolled and assigned to interventions?  | PN              |                                                                                                                                   |
|                                                           | 1.3 Did baseline differences between intervention groups suggest a problem with the randomization process? | N               |                                                                                                                                   |
|                                                           | <b>Risk of bias judgement</b>                                                                              | <b>High</b>     |                                                                                                                                   |
| <b>Bias due to deviations from intended interventions</b> | 2.1. Were participants aware of their assigned intervention during the trial?                              | PN              |                                                                                                                                   |

|                                           |                                                                                                                                                                        |                      |  |
|-------------------------------------------|------------------------------------------------------------------------------------------------------------------------------------------------------------------------|----------------------|--|
|                                           | 2.2. Were carers and people delivering the interventions aware of participants' assigned intervention during the trial?                                                | NI                   |  |
|                                           | 2.3. If Y/PY/NI to 2.1 or 2.2: Were there deviations from the intended intervention that arose because of the experimental context?                                    | NI                   |  |
|                                           | 2.4 If Y/PY to 2.3: Were these deviations likely to have affected the outcome?                                                                                         | NA                   |  |
|                                           | 2.5. If Y/PY/NI to 2.4: Were these deviations from intended intervention balanced between groups?                                                                      | NA                   |  |
|                                           | 2.6 Was an appropriate analysis used to estimate the effect of assignment to intervention?                                                                             | Y                    |  |
|                                           | 2.7 If N/PN/NI to 2.6: Was there potential for a substantial impact (on the result) of the failure to analyse participants in the group to which they were randomized? | NA                   |  |
|                                           | <b>Risk of bias judgement</b>                                                                                                                                          | <b>Some concerns</b> |  |
| <b>Bias due to missing outcome data</b>   | 3.1 Were data for this outcome available for all, or nearly all, participants randomized?                                                                              | Y                    |  |
|                                           | 3.2 If N/PN/NI to 3.1: Is there evidence that result was not biased by missing outcome data?                                                                           | NA                   |  |
|                                           | 3.3 If N/PN to 3.2: Could missingness in the outcome depend on its true value?                                                                                         | NA                   |  |
|                                           | 3.4 If Y/PY/NI to 3.3: Is it likely that missingness in the outcome depended on its true value?                                                                        | NA                   |  |
|                                           | <b>Risk of bias judgement</b>                                                                                                                                          | <b>Low</b>           |  |
| <b>Bias in measurement of the outcome</b> | 4.1 Was the method of measuring the outcome inappropriate?                                                                                                             | PN                   |  |
|                                           | 4.2 Could measurement or ascertainment of the outcome have differed between intervention groups?                                                                       | PY                   |  |
|                                           | 4.3 Were outcome assessors aware of the intervention received by study participants?                                                                                   | NA                   |  |

|                                                 |                                                                                                                                                                                     |                      |  |
|-------------------------------------------------|-------------------------------------------------------------------------------------------------------------------------------------------------------------------------------------|----------------------|--|
|                                                 | 4.4 If Y/PY/NI to 4.3: Could assessment of the outcome have been influenced by knowledge of intervention received?                                                                  | NA                   |  |
|                                                 | 4.5 If Y/PY/NI to 4.4: Is it likely that assessment of the outcome was influenced by knowledge of intervention received?                                                            | NA                   |  |
|                                                 | <b>Risk of bias judgement</b>                                                                                                                                                       | <b>High</b>          |  |
| <b>Bias in selection of the reported result</b> | 5.1 Were the data that produced this result analysed in accordance with a pre-specified analysis plan that was finalized before unblinded outcome data were available for analysis? | NI                   |  |
|                                                 | 5.2 ... multiple eligible outcome measurements (e.g. scales, definitions, time points) within the outcome domain?                                                                   | PN                   |  |
|                                                 | 5.3 ... multiple eligible analyses of the data?                                                                                                                                     | PN                   |  |
|                                                 | <b>Risk of bias judgement</b>                                                                                                                                                       | <b>Some concerns</b> |  |
| <b>Overall risk of bias</b>                     | <b>Risk of bias judgement</b>                                                                                                                                                       | <b>High</b>          |  |

|                                                    |                                                                                                            |                 |                                                                                                                                     |
|----------------------------------------------------|------------------------------------------------------------------------------------------------------------|-----------------|-------------------------------------------------------------------------------------------------------------------------------------|
| <b>Study</b>                                       | Holland 2007                                                                                               |                 |                                                                                                                                     |
| <b>Domain</b>                                      | <b>Signalling question</b>                                                                                 | <b>Response</b> | <b>Comments</b>                                                                                                                     |
| <b>Bias arising from the randomization process</b> | 1.1 Was the allocation sequence random?                                                                    | Y               | “On admission to the ICU, patients were randomised by using sealed envelopes into two groups and baseline measurements were taken.” |
|                                                    | 1.2 Was the allocation sequence concealed until participants were enrolled and assigned to interventions?  | NI              |                                                                                                                                     |
|                                                    | 1.3 Did baseline differences between intervention groups suggest a problem with the randomization process? | PN              |                                                                                                                                     |

|                                                           | <b>Risk of bias judgement</b>                                                                                                                                          | <b>Some concerns</b> |  |
|-----------------------------------------------------------|------------------------------------------------------------------------------------------------------------------------------------------------------------------------|----------------------|--|
| <b>Bias due to deviations from intended interventions</b> | 2.1. Were participants aware of their assigned intervention during the trial?                                                                                          | PN                   |  |
|                                                           | 2.2. Were carers and people delivering the interventions aware of participants' assigned intervention during the trial?                                                | NI                   |  |
|                                                           | 2.3. If Y/PY/NI to 2.1 or 2.2: Were there deviations from the intended intervention that arose because of the experimental context?                                    | NI                   |  |
|                                                           | 2.4 If Y/PY to 2.3: Were these deviations likely to have affected the outcome?                                                                                         | NA                   |  |
|                                                           | 2.5. If Y/PY/NI to 2.4: Were these deviations from intended intervention balanced between groups?                                                                      | NA                   |  |
|                                                           | 2.6 Was an appropriate analysis used to estimate the effect of assignment to intervention?                                                                             | Y                    |  |
|                                                           | 2.7 If N/PN/NI to 2.6: Was there potential for a substantial impact (on the result) of the failure to analyse participants in the group to which they were randomized? | NA                   |  |
|                                                           | <b>Risk of bias judgement</b>                                                                                                                                          | <b>Some concerns</b> |  |
| <b>Bias due to missing outcome data</b>                   | 3.1 Were data for this outcome available for all, or nearly all, participants randomized?                                                                              | Y                    |  |
|                                                           | 3.2 If N/PN/NI to 3.1: Is there evidence that result was not biased by missing outcome data?                                                                           | NA                   |  |
|                                                           | 3.3 If N/PN to 3.2: Could missingness in the outcome depend on its true value?                                                                                         | NA                   |  |
|                                                           | 3.4 If Y/PY/NI to 3.3: Is it likely that missingness in the outcome depended on its true value?                                                                        | NA                   |  |
|                                                           | <b>Risk of bias judgement</b>                                                                                                                                          | <b>Low</b>           |  |
| <b>Bias in measurement of the outcome</b>                 | 4.1 Was the method of measuring the outcome inappropriate?                                                                                                             | N                    |  |



|                                                 |                                                                                                                                                                                     |                      |  |
|-------------------------------------------------|-------------------------------------------------------------------------------------------------------------------------------------------------------------------------------------|----------------------|--|
|                                                 | 4.2 Could measurement or ascertainment of the outcome have differed between intervention groups?                                                                                    | PN                   |  |
|                                                 | 4.3 Were outcome assessors aware of the intervention received by study participants?                                                                                                | PN                   |  |
|                                                 | 4.4 If Y/PY/NI to 4.3: Could assessment of the outcome have been influenced by knowledge of intervention received?                                                                  | NA                   |  |
|                                                 | 4.5 If Y/PY/NI to 4.4: Is it likely that assessment of the outcome was influenced by knowledge of intervention received?                                                            | NA                   |  |
|                                                 | <b>Risk of bias judgement</b>                                                                                                                                                       | <b>Low</b>           |  |
| <b>Bias in selection of the reported result</b> | 5.1 Were the data that produced this result analysed in accordance with a pre-specified analysis plan that was finalized before unblinded outcome data were available for analysis? | Y                    |  |
|                                                 | 5.2 ... multiple eligible outcome measurements (e.g. scales, definitions, time points) within the outcome domain?                                                                   | PN                   |  |
|                                                 | 5.3 ... multiple eligible analyses of the data?                                                                                                                                     | PN                   |  |
|                                                 | <b>Risk of bias judgement</b>                                                                                                                                                       | <b>Low</b>           |  |
| <b>Overall risk of bias</b>                     | <b>Risk of bias judgement</b>                                                                                                                                                       | <b>Some concerns</b> |  |

|                                                    |                                         |                 |                                                                        |
|----------------------------------------------------|-----------------------------------------|-----------------|------------------------------------------------------------------------|
| <b>Study</b>                                       | Korovesi 2011                           |                 |                                                                        |
| <b>Domain</b>                                      | <b>Signalling question</b>              | <b>Response</b> | <b>Comments</b>                                                        |
| <b>Bias arising from the randomization process</b> | 1.1 Was the allocation sequence random? | PY              | “All patients [...] were randomly assigned to receive either zero end- |

|                                                           |                                                                                                                                                                        |                      |                                                                                                                                       |
|-----------------------------------------------------------|------------------------------------------------------------------------------------------------------------------------------------------------------------------------|----------------------|---------------------------------------------------------------------------------------------------------------------------------------|
|                                                           | 1.2 Was the allocation sequence concealed until participants were enrolled and assigned to interventions?                                                              | NI                   | expiratory pressure (ZEEP; ZEEP group) or 8 cm H <sub>2</sub> O of PEEP (PEEP group) following a predesigned chart of randomization.” |
|                                                           | 1.3 Did baseline differences between intervention groups suggest a problem with the randomization process?                                                             | N                    |                                                                                                                                       |
|                                                           | <b>Risk of bias judgement</b>                                                                                                                                          | <b>Some concerns</b> |                                                                                                                                       |
| <b>Bias due to deviations from intended interventions</b> | 2.1. Were participants aware of their assigned intervention during the trial?                                                                                          | PN                   |                                                                                                                                       |
|                                                           | 2.2. Were carers and people delivering the interventions aware of participants' assigned intervention during the trial?                                                | PY                   |                                                                                                                                       |
|                                                           | 2.3. If Y/PY/NI to 2.1 or 2.2: Were there deviations from the intended intervention that arose because of the experimental context?                                    | NI                   |                                                                                                                                       |
|                                                           | 2.4 If Y/PY to 2.3: Were these deviations likely to have affected the outcome?                                                                                         | NA                   |                                                                                                                                       |
|                                                           | 2.5. If Y/PY/NI to 2.4: Were these deviations from intended intervention balanced between groups?                                                                      | NA                   |                                                                                                                                       |
|                                                           | 2.6 Was an appropriate analysis used to estimate the effect of assignment to intervention?                                                                             | Y                    |                                                                                                                                       |
|                                                           | 2.7 If N/PN/NI to 2.6: Was there potential for a substantial impact (on the result) of the failure to analyse participants in the group to which they were randomized? | NA                   |                                                                                                                                       |
|                                                           | <b>Risk of bias judgement</b>                                                                                                                                          | <b>Some concerns</b> |                                                                                                                                       |
| <b>Bias due to missing outcome data</b>                   | 3.1 Were data for this outcome available for all, or nearly all, participants randomized?                                                                              | Y                    |                                                                                                                                       |
|                                                           | 3.2 If N/PN/NI to 3.1: Is there evidence that result was not biased by missing outcome data?                                                                           | NA                   |                                                                                                                                       |
|                                                           | 3.3 If N/PN to 3.2: Could missingness in the outcome depend on its true value?                                                                                         | NA                   |                                                                                                                                       |
|                                                           | 3.4 If Y/PY/NI to 3.3: Is it likely that missingness in the outcome depended on its true value?                                                                        | NA                   |                                                                                                                                       |

|                                                 |                                                                                                                                                                                     |                      |  |
|-------------------------------------------------|-------------------------------------------------------------------------------------------------------------------------------------------------------------------------------------|----------------------|--|
|                                                 | <b>Risk of bias judgement</b>                                                                                                                                                       | <b>Low</b>           |  |
| <b>Bias in measurement of the outcome</b>       | 4.1 Was the method of measuring the outcome inappropriate?                                                                                                                          | N                    |  |
|                                                 | 4.2 Could measurement or ascertainment of the outcome have differed between intervention groups?                                                                                    | PN                   |  |
|                                                 | 4.3 Were outcome assessors aware of the intervention received by study participants?                                                                                                | PY                   |  |
|                                                 | 4.4 If Y/PY/NI to 4.3: Could assessment of the outcome have been influenced by knowledge of intervention received?                                                                  | PY                   |  |
|                                                 | 4.5 If Y/PY/NI to 4.4: Is it likely that assessment of the outcome was influenced by knowledge of intervention received?                                                            | N                    |  |
|                                                 | <b>Risk of bias judgement</b>                                                                                                                                                       | <b>Some concerns</b> |  |
| <b>Bias in selection of the reported result</b> | 5.1 Were the data that produced this result analysed in accordance with a pre-specified analysis plan that was finalized before unblinded outcome data were available for analysis? | Y                    |  |
|                                                 | 5.2 ... multiple eligible outcome measurements (e.g. scales, definitions, time points) within the outcome domain?                                                                   | PN                   |  |
|                                                 | 5.3 ... multiple eligible analyses of the data?                                                                                                                                     | PN                   |  |
|                                                 | <b>Risk of bias judgement</b>                                                                                                                                                       | <b>Low</b>           |  |
| <b>Overall risk of bias</b>                     | <b>Risk of bias judgement</b>                                                                                                                                                       | <b>Some concerns</b> |  |

|              |               |
|--------------|---------------|
| <b>Study</b> | Korovesi 2016 |
|--------------|---------------|

| Domain                                                    | Signalling question                                                                                                                                                    | Response             | Comments                                                                                                                |
|-----------------------------------------------------------|------------------------------------------------------------------------------------------------------------------------------------------------------------------------|----------------------|-------------------------------------------------------------------------------------------------------------------------|
| <b>Bias arising from the randomization process</b>        | 1.1 Was the allocation sequence random?                                                                                                                                | NI                   | “All patients [...] were randomly assigned to receive 0 cmH <sub>2</sub> O of PEEP (ZEEP, n = 12) or 8 (PEEP, n = 15).” |
|                                                           | 1.2 Was the allocation sequence concealed until participants were enrolled and assigned to interventions?                                                              | PN                   |                                                                                                                         |
|                                                           | 1.3 Did baseline differences between intervention groups suggest a problem with the randomization process?                                                             | PN                   |                                                                                                                         |
|                                                           | <b>Risk of bias judgement</b>                                                                                                                                          | <b>High</b>          |                                                                                                                         |
| <b>Bias due to deviations from intended interventions</b> | 2.1. Were participants aware of their assigned intervention during the trial?                                                                                          | PN                   |                                                                                                                         |
|                                                           | 2.2. Were carers and people delivering the interventions aware of participants' assigned intervention during the trial?                                                | PY                   |                                                                                                                         |
|                                                           | 2.3. If Y/PY/NI to 2.1 or 2.2: Were there deviations from the intended intervention that arose because of the experimental context?                                    | NI                   |                                                                                                                         |
|                                                           | 2.4 If Y/PY to 2.3: Were these deviations likely to have affected the outcome?                                                                                         | NA                   |                                                                                                                         |
|                                                           | 2.5. If Y/PY/NI to 2.4: Were these deviations from intended intervention balanced between groups?                                                                      | NA                   |                                                                                                                         |
|                                                           | 2.6 Was an appropriate analysis used to estimate the effect of assignment to intervention?                                                                             | Y                    |                                                                                                                         |
|                                                           | 2.7 If N/PN/NI to 2.6: Was there potential for a substantial impact (on the result) of the failure to analyse participants in the group to which they were randomized? | NA                   |                                                                                                                         |
|                                                           | <b>Risk of bias judgement</b>                                                                                                                                          | <b>Some concerns</b> |                                                                                                                         |
| <b>Bias due to missing outcome data</b>                   | 3.1 Were data for this outcome available for all, or nearly all, participants randomized?                                                                              | Y                    |                                                                                                                         |
|                                                           | 3.2 If N/PN/NI to 3.1: Is there evidence that result was not biased by missing outcome data?                                                                           | NA                   |                                                                                                                         |

|                                                 |                                                                                                                                                                                     |                      |  |
|-------------------------------------------------|-------------------------------------------------------------------------------------------------------------------------------------------------------------------------------------|----------------------|--|
|                                                 | 3.3 If N/PN to 3.2: Could missingness in the outcome depend on its true value?                                                                                                      | NA                   |  |
|                                                 | 3.4 If Y/PY/NI to 3.3: Is it likely that missingness in the outcome depended on its true value?                                                                                     | NA                   |  |
|                                                 | <b>Risk of bias judgement</b>                                                                                                                                                       | <b>Low</b>           |  |
| <b>Bias in measurement of the outcome</b>       | 4.1 Was the method of measuring the outcome inappropriate?                                                                                                                          | N                    |  |
|                                                 | 4.2 Could measurement or ascertainment of the outcome have differed between intervention groups?                                                                                    | PN                   |  |
|                                                 | 4.3 Were outcome assessors aware of the intervention received by study participants?                                                                                                | PY                   |  |
|                                                 | 4.4 If Y/PY/NI to 4.3: Could assessment of the outcome have been influenced by knowledge of intervention received?                                                                  | PY                   |  |
|                                                 | 4.5 If Y/PY/NI to 4.4: Is it likely that assessment of the outcome was influenced by knowledge of intervention received?                                                            | PN                   |  |
|                                                 | <b>Risk of bias judgement</b>                                                                                                                                                       | <b>Some concerns</b> |  |
| <b>Bias in selection of the reported result</b> | 5.1 Were the data that produced this result analysed in accordance with a pre-specified analysis plan that was finalized before unblinded outcome data were available for analysis? | Y                    |  |
|                                                 | 5.2 ... multiple eligible outcome measurements (e.g. scales, definitions, time points) within the outcome domain?                                                                   | PN                   |  |
|                                                 | 5.3 ... multiple eligible analyses of the data?                                                                                                                                     | PN                   |  |
|                                                 | <b>Risk of bias judgement</b>                                                                                                                                                       | <b>Low</b>           |  |
| <b>Overall risk of bias</b>                     | <b>Risk of bias judgement</b>                                                                                                                                                       | <b>High</b>          |  |

| Study                                                     | Koutsoukou                                                                                                                                                             |                      |                                                                       |
|-----------------------------------------------------------|------------------------------------------------------------------------------------------------------------------------------------------------------------------------|----------------------|-----------------------------------------------------------------------|
| Domain                                                    | Signalling question                                                                                                                                                    | Response             | Comments                                                              |
| <b>Bias arising from the randomization process</b>        | 1.1 Was the allocation sequence random?                                                                                                                                | NI                   | “Patients were randomly assigned to receive 8 cmH2O of PEEP or ZEEP.” |
|                                                           | 1.2 Was the allocation sequence concealed until participants were enrolled and assigned to interventions?                                                              | PN                   |                                                                       |
|                                                           | 1.3 Did baseline differences between intervention groups suggest a problem with the randomization process?                                                             | PN                   |                                                                       |
|                                                           | <b>Risk of bias judgement</b>                                                                                                                                          | <b>High</b>          |                                                                       |
| <b>Bias due to deviations from intended interventions</b> | 2.1. Were participants aware of their assigned intervention during the trial?                                                                                          | N                    |                                                                       |
|                                                           | 2.2. Were carers and people delivering the interventions aware of participants' assigned intervention during the trial?                                                | NI                   |                                                                       |
|                                                           | 2.3. If Y/PY/NI to 2.1 or 2.2: Were there deviations from the intended intervention that arose because of the experimental context?                                    | NI                   |                                                                       |
|                                                           | 2.4 If Y/PY to 2.3: Were these deviations likely to have affected the outcome?                                                                                         | NA                   |                                                                       |
|                                                           | 2.5. If Y/PY/NI to 2.4: Were these deviations from intended intervention balanced between groups?                                                                      | NA                   |                                                                       |
|                                                           | 2.6 Was an appropriate analysis used to estimate the effect of assignment to intervention?                                                                             | Y                    |                                                                       |
|                                                           | 2.7 If N/PN/NI to 2.6: Was there potential for a substantial impact (on the result) of the failure to analyse participants in the group to which they were randomized? | NA                   |                                                                       |
|                                                           | <b>Risk of bias judgement</b>                                                                                                                                          | <b>Some concerns</b> |                                                                       |

|                                                 |                                                                                                                                                                                     |                      |  |
|-------------------------------------------------|-------------------------------------------------------------------------------------------------------------------------------------------------------------------------------------|----------------------|--|
| <b>Bias due to missing outcome data</b>         | 3.1 Were data for this outcome available for all, or nearly all, participants randomized?                                                                                           | Y                    |  |
|                                                 | 3.2 If N/PN/NI to 3.1: Is there evidence that result was not biased by missing outcome data?                                                                                        | NA                   |  |
|                                                 | 3.3 If N/PN to 3.2: Could missingness in the outcome depend on its true value?                                                                                                      | NA                   |  |
|                                                 | 3.4 If Y/PY/NI to 3.3: Is it likely that missingness in the outcome depended on its true value?                                                                                     | NA                   |  |
|                                                 | <b>Risk of bias judgement</b>                                                                                                                                                       | <b>Low</b>           |  |
| <b>Bias in measurement of the outcome</b>       | 4.1 Was the method of measuring the outcome inappropriate?                                                                                                                          | PN                   |  |
|                                                 | 4.2 Could measurement or ascertainment of the outcome have differed between intervention groups?                                                                                    | NI                   |  |
|                                                 | 4.3 Were outcome assessors aware of the intervention received by study participants?                                                                                                | NI                   |  |
|                                                 | 4.4 If Y/PY/NI to 4.3: Could assessment of the outcome have been influenced by knowledge of intervention received?                                                                  | NI                   |  |
|                                                 | 4.5 If Y/PY/NI to 4.4: Is it likely that assessment of the outcome was influenced by knowledge of intervention received?                                                            | PN                   |  |
|                                                 | <b>Risk of bias judgement</b>                                                                                                                                                       | <b>Some concerns</b> |  |
| <b>Bias in selection of the reported result</b> | 5.1 Were the data that produced this result analysed in accordance with a pre-specified analysis plan that was finalized before unblinded outcome data were available for analysis? | N                    |  |
|                                                 | 5.2 ... multiple eligible outcome measurements (e.g. scales, definitions, time points) within the outcome domain?                                                                   | PN                   |  |
|                                                 | 5.3 ... multiple eligible analyses of the data?                                                                                                                                     | PN                   |  |
|                                                 | <b>Risk of bias judgement</b>                                                                                                                                                       | <b>Some concerns</b> |  |

|                             |                               |             |  |
|-----------------------------|-------------------------------|-------------|--|
| <b>Overall risk of bias</b> | <b>Risk of bias judgement</b> | <b>High</b> |  |
|-----------------------------|-------------------------------|-------------|--|

|                                                           |                                                                                                                                     |                 |                                                                                                       |
|-----------------------------------------------------------|-------------------------------------------------------------------------------------------------------------------------------------|-----------------|-------------------------------------------------------------------------------------------------------|
| <b>Study</b>                                              | Lago Borges 2013                                                                                                                    |                 |                                                                                                       |
| <b>Domain</b>                                             | <b>Signalling question</b>                                                                                                          | <b>Response</b> | <b>Comments</b>                                                                                       |
| <b>Bias arising from the randomization process</b>        | 1.1 Was the allocation sequence random?                                                                                             | NI              | Randomized clinical trial in a northeastern Brazilian federal university hospital.”                   |
|                                                           | 1.2 Was the allocation sequence concealed until participants were enrolled and assigned to interventions?                           | PN              |                                                                                                       |
|                                                           | 1.3 Did baseline differences between intervention groups suggest a problem with the randomization process?                          | N               |                                                                                                       |
|                                                           | <b>Risk of bias judgement</b>                                                                                                       | <b>High</b>     |                                                                                                       |
| <b>Bias due to deviations from intended interventions</b> | 2.1. Were participants aware of their assigned intervention during the trial?                                                       | PN              | “After draw, information about which group the patient would be allocated, was given to ICU members.” |
|                                                           | 2.2. Were carers and people delivering the interventions aware of participants' assigned intervention during the trial?             | PY              |                                                                                                       |
|                                                           | 2.3. If Y/PY/NI to 2.1 or 2.2: Were there deviations from the intended intervention that arose because of the experimental context? | NI              |                                                                                                       |
|                                                           | 2.4 If Y/PY to 2.3: Were these deviations likely to have affected the outcome?                                                      | NA              |                                                                                                       |
|                                                           | 2.5. If Y/PY/NI to 2.4: Were these deviations from intended intervention balanced between groups?                                   | NA              |                                                                                                       |
|                                                           | 2.6 Was an appropriate analysis used to estimate the effect of assignment to intervention?                                          | Y               |                                                                                                       |



|                                                 |                                                                                                                                                                                     |                      |                                                                                                              |
|-------------------------------------------------|-------------------------------------------------------------------------------------------------------------------------------------------------------------------------------------|----------------------|--------------------------------------------------------------------------------------------------------------|
|                                                 | 2.7 If N/PN/NI to 2.6: Was there potential for a substantial impact (on the result) of the failure to analyse participants in the group to which they were randomized?              | NA                   |                                                                                                              |
|                                                 | <b>Risk of bias judgement</b>                                                                                                                                                       | <b>Some concerns</b> |                                                                                                              |
| <b>Bias due to missing outcome data</b>         | 3.1 Were data for this outcome available for all, or nearly all, participants randomized?                                                                                           | Y                    |                                                                                                              |
|                                                 | 3.2 If N/PN/NI to 3.1: Is there evidence that result was not biased by missing outcome data?                                                                                        | NA                   |                                                                                                              |
|                                                 | 3.3 If N/PN to 3.2: Could missingness in the outcome depend on its true value?                                                                                                      | NA                   |                                                                                                              |
|                                                 | 3.4 If Y/PY/NI to 3.3: Is it likely that missingness in the outcome depended on its true value?                                                                                     | NA                   |                                                                                                              |
|                                                 | <b>Risk of bias judgement</b>                                                                                                                                                       | <b>Low</b>           |                                                                                                              |
| <b>Bias in measurement of the outcome</b>       | 4.1 Was the method of measuring the outcome inappropriate?                                                                                                                          | PN                   |                                                                                                              |
|                                                 | 4.2 Could measurement or ascertainment of the outcome have differed between intervention groups?                                                                                    | PY                   |                                                                                                              |
|                                                 | 4.3 Were outcome assessors aware of the intervention received by study participants?                                                                                                | NA                   |                                                                                                              |
|                                                 | 4.4 If Y/PY/NI to 4.3: Could assessment of the outcome have been influenced by knowledge of intervention received?                                                                  | NA                   |                                                                                                              |
|                                                 | 4.5 If Y/PY/NI to 4.4: Is it likely that assessment of the outcome was influenced by knowledge of intervention received?                                                            | NA                   |                                                                                                              |
|                                                 | <b>Risk of bias judgement</b>                                                                                                                                                       | <b>High</b>          |                                                                                                              |
| <b>Bias in selection of the reported result</b> | 5.1 Were the data that produced this result analysed in accordance with a pre-specified analysis plan that was finalized before unblinded outcome data were available for analysis? | N                    |                                                                                                              |
|                                                 | 5.2 ... multiple eligible outcome measurements (e.g. scales, definitions, time points) within the outcome domain?                                                                   | Y                    | “We also excluded patients who died in the perioperative period before weaning from mechanical ventilation.” |

|                             |                                                 |             |  |
|-----------------------------|-------------------------------------------------|-------------|--|
|                             | 5.3 ... multiple eligible analyses of the data? | PN          |  |
|                             | <b>Risk of bias judgement</b>                   | <b>High</b> |  |
| <b>Overall risk of bias</b> | <b>Risk of bias judgement</b>                   | <b>High</b> |  |

|                                                           |                                                                                                                                     |                 |                                                                                                |
|-----------------------------------------------------------|-------------------------------------------------------------------------------------------------------------------------------------|-----------------|------------------------------------------------------------------------------------------------|
| <b>Study</b>                                              | Lago Borges 2014                                                                                                                    |                 |                                                                                                |
| <b>Domain</b>                                             | <b>Signalling question</b>                                                                                                          | <b>Response</b> | <b>Comments</b>                                                                                |
| <b>Bias arising from the randomization process</b>        | 1.1 Was the allocation sequence random?                                                                                             | NI              | “Randomized clinical trial conducted in a federal university hospital in northeastern Brazil.” |
|                                                           | 1.2 Was the allocation sequence concealed until participants were enrolled and assigned to interventions?                           | PN              | “Patients were assigned to one of three groups using a simple draw”                            |
|                                                           | 1.3 Did baseline differences between intervention groups suggest a problem with the randomization process?                          | N               |                                                                                                |
|                                                           | <b>Risk of bias judgement</b>                                                                                                       | <b>High</b>     |                                                                                                |
| <b>Bias due to deviations from intended interventions</b> | 2.1. Were participants aware of their assigned intervention during the trial?                                                       | PN              | “Patients were assigned to one of three groups using a simple draw”                            |
|                                                           | 2.2. Were carers and people delivering the interventions aware of participants' assigned intervention during the trial?             | PY              |                                                                                                |
|                                                           | 2.3. If Y/PY/NI to 2.1 or 2.2: Were there deviations from the intended intervention that arose because of the experimental context? | NI              |                                                                                                |
|                                                           | 2.4 If Y/PY to 2.3: Were these deviations likely to have affected the outcome?                                                      | NA              |                                                                                                |

|                                           |                                                                                                                                                                        |                      |  |
|-------------------------------------------|------------------------------------------------------------------------------------------------------------------------------------------------------------------------|----------------------|--|
|                                           | 2.5. If Y/PY/NI to 2.4: Were these deviations from intended intervention balanced between groups?                                                                      | NA                   |  |
|                                           | 2.6 Was an appropriate analysis used to estimate the effect of assignment to intervention?                                                                             | Y                    |  |
|                                           | 2.7 If N/PN/NI to 2.6: Was there potential for a substantial impact (on the result) of the failure to analyse participants in the group to which they were randomized? | NA                   |  |
|                                           | <b>Risk of bias judgement</b>                                                                                                                                          | <b>Some concerns</b> |  |
| <b>Bias due to missing outcome data</b>   | 3.1 Were data for this outcome available for all, or nearly all, participants randomized?                                                                              | Y                    |  |
|                                           | 3.2 If N/PN/NI to 3.1: Is there evidence that result was not biased by missing outcome data?                                                                           | NA                   |  |
|                                           | 3.3 If N/PN to 3.2: Could missingness in the outcome depend on its true value?                                                                                         | NA                   |  |
|                                           | 3.4 If Y/PY/NI to 3.3: Is it likely that missingness in the outcome depended on its true value?                                                                        | NA                   |  |
|                                           | <b>Risk of bias judgement</b>                                                                                                                                          | <b>Low</b>           |  |
| <b>Bias in measurement of the outcome</b> | 4.1 Was the method of measuring the outcome inappropriate?                                                                                                             | N                    |  |
|                                           | 4.2 Could measurement or ascertainment of the outcome have differed between intervention groups?                                                                       | PY                   |  |
|                                           | 4.3 Were outcome assessors aware of the intervention received by study participants?                                                                                   | NA                   |  |
|                                           | 4.4 If Y/PY/NI to 4.3: Could assessment of the outcome have been influenced by knowledge of intervention received?                                                     | NA                   |  |
|                                           | 4.5 If Y/PY/NI to 4.4: Is it likely that assessment of the outcome was influenced by knowledge of intervention received?                                               | NA                   |  |
|                                           | <b>Risk of bias judgement</b>                                                                                                                                          | <b>High</b>          |  |

|                                                 |                                                                                                                                                                                     |             |                                                                                                                                                                                                                                                                                                                                                                                   |
|-------------------------------------------------|-------------------------------------------------------------------------------------------------------------------------------------------------------------------------------------|-------------|-----------------------------------------------------------------------------------------------------------------------------------------------------------------------------------------------------------------------------------------------------------------------------------------------------------------------------------------------------------------------------------|
| <b>Bias in selection of the reported result</b> | 5.1 Were the data that produced this result analysed in accordance with a pre-specified analysis plan that was finalized before unblinded outcome data were available for analysis? | PN          |                                                                                                                                                                                                                                                                                                                                                                                   |
|                                                 | 5.2 ... multiple eligible outcome measurements (e.g. scales, definitions, time points) within the outcome domain?                                                                   | Y           | <p>“We also excluded patients who died in the perioperative period before weaning from mechanical ventilation.”</p> <p>“Comparing only patients extubated within 12 hours after ICU admission, i.e., uncomplicated in the immediate postoperative period, we found a statistically significant difference in mechanical ventilation duration between the groups (p = 0.029).”</p> |
|                                                 | 5.3 ... multiple eligible analyses of the data?                                                                                                                                     | PN          |                                                                                                                                                                                                                                                                                                                                                                                   |
|                                                 | <b>Risk of bias judgement</b>                                                                                                                                                       | <b>High</b> |                                                                                                                                                                                                                                                                                                                                                                                   |
| <b>Overall risk of bias</b>                     | <b>Risk of bias judgement</b>                                                                                                                                                       | <b>High</b> |                                                                                                                                                                                                                                                                                                                                                                                   |

|                                                    |                                                                                                           |                 |                                                                                                                                                                                                   |
|----------------------------------------------------|-----------------------------------------------------------------------------------------------------------|-----------------|---------------------------------------------------------------------------------------------------------------------------------------------------------------------------------------------------|
| <b>Study</b>                                       | Lesur                                                                                                     |                 |                                                                                                                                                                                                   |
| <b>Domain</b>                                      | <b>Signalling question</b>                                                                                | <b>Response</b> | <b>Comments</b>                                                                                                                                                                                   |
| <b>Bias arising from the randomization process</b> | 1.1 Was the allocation sequence random?                                                                   | Y               | “A computer-generated block randomization list was prepared by the principal investigator (Olivier Lesur). Randomization was concealed using numbered, sealed, opaque envelopes. On assessment of |
|                                                    | 1.2 Was the allocation sequence concealed until participants were enrolled and assigned to interventions? | Y               |                                                                                                                                                                                                   |

|                                                           |                                                                                                                                     |            |                                                                                                                                                                                                                                                                                                                                                                                                                                                                                                                                                                          |
|-----------------------------------------------------------|-------------------------------------------------------------------------------------------------------------------------------------|------------|--------------------------------------------------------------------------------------------------------------------------------------------------------------------------------------------------------------------------------------------------------------------------------------------------------------------------------------------------------------------------------------------------------------------------------------------------------------------------------------------------------------------------------------------------------------------------|
|                                                           |                                                                                                                                     |            | the patient's eligibility, the randomization process was initiated by the opening of the first numbered envelope by the 'on ward' respiratory therapist. The ICU physician on duty was blinded to this procedure; the respiratory therapist adjusted the MV parameters (according to the physician's recommendations) with ZEEP or PEEP (according to the study's allocation), masking visual identification of allocation for the following 90 min. The ICU physician could halt the blinding at any moment, whenever he or she was not comfortable with the protocol." |
|                                                           | 1.3 Did baseline differences between intervention groups suggest a problem with the randomization process?                          | N          |                                                                                                                                                                                                                                                                                                                                                                                                                                                                                                                                                                          |
|                                                           | <b>Risk of bias judgement</b>                                                                                                       | <b>Low</b> |                                                                                                                                                                                                                                                                                                                                                                                                                                                                                                                                                                          |
| <b>Bias due to deviations from intended interventions</b> | 2.1. Were participants aware of their assigned intervention during the trial?                                                       | PN         |                                                                                                                                                                                                                                                                                                                                                                                                                                                                                                                                                                          |
|                                                           | 2.2. Were carers and people delivering the interventions aware of participants' assigned intervention during the trial?             | PY         |                                                                                                                                                                                                                                                                                                                                                                                                                                                                                                                                                                          |
|                                                           | 2.3. If Y/PY/NI to 2.1 or 2.2: Were there deviations from the intended intervention that arose because of the experimental context? | N          |                                                                                                                                                                                                                                                                                                                                                                                                                                                                                                                                                                          |
|                                                           | 2.4 If Y/PY to 2.3: Were these deviations likely to have affected the outcome?                                                      | NA         |                                                                                                                                                                                                                                                                                                                                                                                                                                                                                                                                                                          |
|                                                           | 2.5. If Y/PY/NI to 2.4: Were these deviations from intended intervention balanced between groups?                                   | NA         |                                                                                                                                                                                                                                                                                                                                                                                                                                                                                                                                                                          |
|                                                           | 2.6 Was an appropriate analysis used to estimate the effect of assignment to intervention?                                          | Y          |                                                                                                                                                                                                                                                                                                                                                                                                                                                                                                                                                                          |

|                                                 |                                                                                                                                                                                     |                      |                                                                                                                                        |
|-------------------------------------------------|-------------------------------------------------------------------------------------------------------------------------------------------------------------------------------------|----------------------|----------------------------------------------------------------------------------------------------------------------------------------|
|                                                 | 2.7 If N/PN/NI to 2.6: Was there potential for a substantial impact (on the result) of the failure to analyse participants in the group to which they were randomized?              | NA                   |                                                                                                                                        |
|                                                 | <b>Risk of bias judgement</b>                                                                                                                                                       | <b>Low</b>           |                                                                                                                                        |
| <b>Bias due to missing outcome data</b>         | 3.1 Were data for this outcome available for all, or nearly all, participants randomized?                                                                                           | Y                    |                                                                                                                                        |
|                                                 | 3.2 If N/PN/NI to 3.1: Is there evidence that result was not biased by missing outcome data?                                                                                        | NA                   |                                                                                                                                        |
|                                                 | 3.3 If N/PN to 3.2: Could missingness in the outcome depend on its true value?                                                                                                      | NA                   |                                                                                                                                        |
|                                                 | 3.4 If Y/PY/NI to 3.3: Is it likely that missingness in the outcome depended on its true value?                                                                                     | NA                   |                                                                                                                                        |
|                                                 | <b>Risk of bias judgement</b>                                                                                                                                                       | <b>Low</b>           |                                                                                                                                        |
| <b>Bias in measurement of the outcome</b>       | 4.1 Was the method of measuring the outcome inappropriate?                                                                                                                          | N                    | “The lowest MAP values for each individual and period were selected to be representative for delta calculation and mean measurements.” |
|                                                 | 4.2 Could measurement or ascertainment of the outcome have differed between intervention groups?                                                                                    | PN                   |                                                                                                                                        |
|                                                 | 4.3 Were outcome assessors aware of the intervention received by study participants?                                                                                                | PY                   |                                                                                                                                        |
|                                                 | 4.4 If Y/PY/NI to 4.3: Could assessment of the outcome have been influenced by knowledge of intervention received?                                                                  | PY                   |                                                                                                                                        |
|                                                 | 4.5 If Y/PY/NI to 4.4: Is it likely that assessment of the outcome was influenced by knowledge of intervention received?                                                            | PN                   |                                                                                                                                        |
|                                                 | <b>Risk of bias judgement</b>                                                                                                                                                       | <b>Some concerns</b> |                                                                                                                                        |
| <b>Bias in selection of the reported result</b> | 5.1 Were the data that produced this result analysed in accordance with a pre-specified analysis plan that was finalized before unblinded outcome data were available for analysis? | Y                    | “The general characteristics of both intention-to-treat study groups were very similar and representative of a                         |

|                             |                                                                                                                   |                      |                                         |
|-----------------------------|-------------------------------------------------------------------------------------------------------------------|----------------------|-----------------------------------------|
|                             |                                                                                                                   |                      | typical medical ICU admission profile.” |
|                             | 5.2 ... multiple eligible outcome measurements (e.g. scales, definitions, time points) within the outcome domain? | PN                   |                                         |
|                             | 5.3 ... multiple eligible analyses of the data?                                                                   | PN                   |                                         |
|                             | <b>Risk of bias judgement</b>                                                                                     | <b>Low</b>           |                                         |
| <b>Overall risk of bias</b> | <b>Risk of bias judgement</b>                                                                                     | <b>Some concerns</b> |                                         |

|                                                           |                                                                                                            |                      |                                                                                                                                                                                                                                                                                               |
|-----------------------------------------------------------|------------------------------------------------------------------------------------------------------------|----------------------|-----------------------------------------------------------------------------------------------------------------------------------------------------------------------------------------------------------------------------------------------------------------------------------------------|
| <b>Study</b>                                              | Ma                                                                                                         |                      |                                                                                                                                                                                                                                                                                               |
| <b>Domain</b>                                             | <b>Signalling question</b>                                                                                 | <b>Response</b>      | <b>Comments</b>                                                                                                                                                                                                                                                                               |
| <b>Bias arising from the randomization process</b>        | 1.1 Was the allocation sequence random?                                                                    | Y                    | “120 patients with NEP admitted to Department of Critical Care Medicine of the First Affiliated Hospital of Guangxi Traditional Chinese Medical University from January 2010 to August 2013 were enrolled and divided into two groups according to random number table (n=60 in each group).” |
|                                                           | 1.2 Was the allocation sequence concealed until participants were enrolled and assigned to interventions?  | NI                   |                                                                                                                                                                                                                                                                                               |
|                                                           | 1.3 Did baseline differences between intervention groups suggest a problem with the randomization process? | N                    |                                                                                                                                                                                                                                                                                               |
|                                                           | <b>Risk of bias judgement</b>                                                                              | <b>Some concerns</b> |                                                                                                                                                                                                                                                                                               |
| <b>Bias due to deviations from intended interventions</b> | 2.1. Were participants aware of their assigned intervention during the trial?                              | PN                   |                                                                                                                                                                                                                                                                                               |

|                                           |                                                                                                                                                                        |            |  |
|-------------------------------------------|------------------------------------------------------------------------------------------------------------------------------------------------------------------------|------------|--|
|                                           | 2.2. Were carers and people delivering the interventions aware of participants' assigned intervention during the trial?                                                | NI         |  |
|                                           | 2.3. If Y/PY/NI to 2.1 or 2.2: Were there deviations from the intended intervention that arose because of the experimental context?                                    | N          |  |
|                                           | 2.4 If Y/PY to 2.3: Were these deviations likely to have affected the outcome?                                                                                         | NA         |  |
|                                           | 2.5. If Y/PY/NI to 2.4: Were these deviations from intended intervention balanced between groups?                                                                      | NA         |  |
|                                           | 2.6 Was an appropriate analysis used to estimate the effect of assignment to intervention?                                                                             | Y          |  |
|                                           | 2.7 If N/PN/NI to 2.6: Was there potential for a substantial impact (on the result) of the failure to analyse participants in the group to which they were randomized? | NA         |  |
|                                           | <b>Risk of bias judgement</b>                                                                                                                                          | <b>Low</b> |  |
| <b>Bias due to missing outcome data</b>   | 3.1 Were data for this outcome available for all, or nearly all, participants randomized?                                                                              | Y          |  |
|                                           | 3.2 If N/PN/NI to 3.1: Is there evidence that result was not biased by missing outcome data?                                                                           | NA         |  |
|                                           | 3.3 If N/PN to 3.2: Could missingness in the outcome depend on its true value?                                                                                         | NA         |  |
|                                           | 3.4 If Y/PY/NI to 3.3: Is it likely that missingness in the outcome depended on its true value?                                                                        | NA         |  |
|                                           | <b>Risk of bias judgement</b>                                                                                                                                          | <b>Low</b> |  |
| <b>Bias in measurement of the outcome</b> | 4.1 Was the method of measuring the outcome inappropriate?                                                                                                             | PN         |  |
|                                           | 4.2 Could measurement or ascertainment of the outcome have differed between intervention groups?                                                                       | PN         |  |
|                                           | 4.3 Were outcome assessors aware of the intervention received by study participants?                                                                                   | NI         |  |



|                                                 |                                                                                                                                                                                     |                      |  |
|-------------------------------------------------|-------------------------------------------------------------------------------------------------------------------------------------------------------------------------------------|----------------------|--|
|                                                 | 4.4 If Y/PY/NI to 4.3: Could assessment of the outcome have been influenced by knowledge of intervention received?                                                                  | NI                   |  |
|                                                 | 4.5 If Y/PY/NI to 4.4: Is it likely that assessment of the outcome was influenced by knowledge of intervention received?                                                            | PN                   |  |
|                                                 | <b>Risk of bias judgement</b>                                                                                                                                                       | <b>Some concerns</b> |  |
| <b>Bias in selection of the reported result</b> | 5.1 Were the data that produced this result analysed in accordance with a pre-specified analysis plan that was finalized before unblinded outcome data were available for analysis? | PY                   |  |
|                                                 | 5.2 ... multiple eligible outcome measurements (e.g. scales, definitions, time points) within the outcome domain?                                                                   | NI                   |  |
|                                                 | 5.3 ... multiple eligible analyses of the data?                                                                                                                                     | PN                   |  |
|                                                 | <b>Risk of bias judgement</b>                                                                                                                                                       | <b>Some concerns</b> |  |
| <b>Overall risk of bias</b>                     | <b>Risk of bias judgement</b>                                                                                                                                                       | <b>Some concerns</b> |  |

|                                                    |                                                                                                           |                 |                                                                                                                                                                                      |
|----------------------------------------------------|-----------------------------------------------------------------------------------------------------------|-----------------|--------------------------------------------------------------------------------------------------------------------------------------------------------------------------------------|
| <b>Study</b>                                       | Manzano                                                                                                   |                 |                                                                                                                                                                                      |
| <b>Domain</b>                                      | <b>Signalling question</b>                                                                                | <b>Response</b> | <b>Comments</b>                                                                                                                                                                      |
| <b>Bias arising from the randomization process</b> | 1.1 Was the allocation sequence random?                                                                   | Y               | “This prospective, randomized, nonblinded, controlled clinical trial was performed in two general intensive care units (ICUs) and one trauma ICU in two reference centers in Spain.” |
|                                                    | 1.2 Was the allocation sequence concealed until participants were enrolled and assigned to interventions? | PY              |                                                                                                                                                                                      |

|                                                           |                                                                                                                                                                        |                      |                                                                                                                                                                                                                                                    |
|-----------------------------------------------------------|------------------------------------------------------------------------------------------------------------------------------------------------------------------------|----------------------|----------------------------------------------------------------------------------------------------------------------------------------------------------------------------------------------------------------------------------------------------|
|                                                           |                                                                                                                                                                        |                      | “Patients were assigned to the PEEP group or control group using a computer-generated randomization list in blocks of 12. Allocation to control group or PEEP group was concealed in a closed envelope by an assistant not involved in the study.” |
|                                                           | 1.3 Did baseline differences between intervention groups suggest a problem with the randomization process?                                                             | N                    |                                                                                                                                                                                                                                                    |
|                                                           | <b>Risk of bias judgement</b>                                                                                                                                          | <b>Low</b>           |                                                                                                                                                                                                                                                    |
| <b>Bias due to deviations from intended interventions</b> | 2.1. Were participants aware of their assigned intervention during the trial?                                                                                          | PN                   |                                                                                                                                                                                                                                                    |
|                                                           | 2.2. Were carers and people delivering the interventions aware of participants' assigned intervention during the trial?                                                | Y                    |                                                                                                                                                                                                                                                    |
|                                                           | 2.3. If Y/PY/NI to 2.1 or 2.2: Were there deviations from the intended intervention that arose because of the experimental context?                                    | NI                   |                                                                                                                                                                                                                                                    |
|                                                           | 2.4 If Y/PY to 2.3: Were these deviations likely to have affected the outcome?                                                                                         | NA                   |                                                                                                                                                                                                                                                    |
|                                                           | 2.5. If Y/PY/NI to 2.4: Were these deviations from intended intervention balanced between groups?                                                                      | NA                   |                                                                                                                                                                                                                                                    |
|                                                           | 2.6 Was an appropriate analysis used to estimate the effect of assignment to intervention?                                                                             | Y                    | “All analyses were conducted on an intention-to-treat basis.”                                                                                                                                                                                      |
|                                                           | 2.7 If N/PN/NI to 2.6: Was there potential for a substantial impact (on the result) of the failure to analyse participants in the group to which they were randomized? | NA                   |                                                                                                                                                                                                                                                    |
|                                                           | <b>Risk of bias judgement</b>                                                                                                                                          | <b>Some concerns</b> |                                                                                                                                                                                                                                                    |
| <b>Bias due to missing outcome data</b>                   | 3.1 Were data for this outcome available for all, or nearly all, participants randomized?                                                                              | Y                    |                                                                                                                                                                                                                                                    |
|                                                           | 3.2 If N/PN/NI to 3.1: Is there evidence that result was not biased by missing outcome data?                                                                           | NA                   |                                                                                                                                                                                                                                                    |

|                                                 |                                                                                                                                                                                     |                      |                                                                                                                                                                                    |
|-------------------------------------------------|-------------------------------------------------------------------------------------------------------------------------------------------------------------------------------------|----------------------|------------------------------------------------------------------------------------------------------------------------------------------------------------------------------------|
|                                                 | 3.3 If N/PN to 3.2: Could missingness in the outcome depend on its true value?                                                                                                      | NA                   |                                                                                                                                                                                    |
|                                                 | 3.4 If Y/PY/NI to 3.3: Is it likely that missingness in the outcome depended on its true value?                                                                                     | NA                   |                                                                                                                                                                                    |
|                                                 | <b>Risk of bias judgement</b>                                                                                                                                                       | <b>Low</b>           |                                                                                                                                                                                    |
| <b>Bias in measurement of the outcome</b>       | 4.1 Was the method of measuring the outcome inappropriate?                                                                                                                          | N                    | “Radiographs were interpreted by consensus between two physicians (intensivists with >5 yrs experience) and, if agreement could not be reached, by decision of a third physician.” |
|                                                 | 4.2 Could measurement or ascertainment of the outcome have differed between intervention groups?                                                                                    | PN                   |                                                                                                                                                                                    |
|                                                 | 4.3 Were outcome assessors aware of the intervention received by study participants?                                                                                                | Y                    |                                                                                                                                                                                    |
|                                                 | 4.4 If Y/PY/NI to 4.3: Could assessment of the outcome have been influenced by knowledge of intervention received?                                                                  | PY                   | The precise definitions of the outcomes reduce the likelihood of subjective outcome assessment.                                                                                    |
|                                                 | 4.5 If Y/PY/NI to 4.4: Is it likely that assessment of the outcome was influenced by knowledge of intervention received?                                                            | PN                   |                                                                                                                                                                                    |
|                                                 | <b>Risk of bias judgement</b>                                                                                                                                                       | <b>Some concerns</b> |                                                                                                                                                                                    |
| <b>Bias in selection of the reported result</b> | 5.1 Were the data that produced this result analysed in accordance with a pre-specified analysis plan that was finalized before unblinded outcome data were available for analysis? | Y                    |                                                                                                                                                                                    |
|                                                 | 5.2 ... multiple eligible outcome measurements (e.g. scales, definitions, time points) within the outcome domain?                                                                   | PN                   |                                                                                                                                                                                    |
|                                                 | 5.3 ... multiple eligible analyses of the data?                                                                                                                                     | PN                   |                                                                                                                                                                                    |
|                                                 | <b>Risk of bias judgement</b>                                                                                                                                                       | <b>Low</b>           |                                                                                                                                                                                    |
| <b>Overall risk of bias</b>                     | <b>Risk of bias judgement</b>                                                                                                                                                       | <b>Some concerns</b> |                                                                                                                                                                                    |

|                                                           |                                                                                                                                     |                      |                                                                                                                                                                                                                     |
|-----------------------------------------------------------|-------------------------------------------------------------------------------------------------------------------------------------|----------------------|---------------------------------------------------------------------------------------------------------------------------------------------------------------------------------------------------------------------|
| <b>Study</b>                                              | Marvel                                                                                                                              |                      |                                                                                                                                                                                                                     |
| <b>Domain</b>                                             | <b>Signalling question</b>                                                                                                          | <b>Response</b>      | <b>Comments</b>                                                                                                                                                                                                     |
| <b>Bias arising from the randomization process</b>        | 1.1 Was the allocation sequence random?                                                                                             | Y                    | “The remaining 44 patients were randomly assigned by computer to one of three groups. The computer program maintained an equal distribution of any individual surgeon's patients among the three treatment groups.” |
|                                                           | 1.2 Was the allocation sequence concealed until participants were enrolled and assigned to interventions?                           | NI                   |                                                                                                                                                                                                                     |
|                                                           | 1.3 Did baseline differences between intervention groups suggest a problem with the randomization process?                          | PN                   |                                                                                                                                                                                                                     |
|                                                           | <b>Risk of bias judgement</b>                                                                                                       | <b>Some concerns</b> |                                                                                                                                                                                                                     |
| <b>Bias due to deviations from intended interventions</b> | 2.1. Were participants aware of their assigned intervention during the trial?                                                       | PN                   |                                                                                                                                                                                                                     |
|                                                           | 2.2. Were carers and people delivering the interventions aware of participants' assigned intervention during the trial?             | PY                   |                                                                                                                                                                                                                     |
|                                                           | 2.3. If Y/PY/NI to 2.1 or 2.2: Were there deviations from the intended intervention that arose because of the experimental context? | NI                   |                                                                                                                                                                                                                     |
|                                                           | 2.4 If Y/PY to 2.3: Were these deviations likely to have affected the outcome?                                                      | NA                   |                                                                                                                                                                                                                     |
|                                                           | 2.5. If Y/PY/NI to 2.4: Were these deviations from intended intervention balanced between groups?                                   | NA                   |                                                                                                                                                                                                                     |
|                                                           | 2.6 Was an appropriate analysis used to estimate the effect of assignment to intervention?                                          | PY                   |                                                                                                                                                                                                                     |

|                                                 |                                                                                                                                                                                     |                      |                                                                                                                       |
|-------------------------------------------------|-------------------------------------------------------------------------------------------------------------------------------------------------------------------------------------|----------------------|-----------------------------------------------------------------------------------------------------------------------|
|                                                 | 2.7 If N/PN/NI to 2.6: Was there potential for a substantial impact (on the result) of the failure to analyse participants in the group to which they were randomized?              | NA                   |                                                                                                                       |
|                                                 | <b>Risk of bias judgement</b>                                                                                                                                                       | <b>Some concerns</b> |                                                                                                                       |
| <b>Bias due to missing outcome data</b>         | 3.1 Were data for this outcome available for all, or nearly all, participants randomized?                                                                                           | Y                    |                                                                                                                       |
|                                                 | 3.2 If N/PN/NI to 3.1: Is there evidence that result was not biased by missing outcome data?                                                                                        | NA                   |                                                                                                                       |
|                                                 | 3.3 If N/PN to 3.2: Could missingness in the outcome depend on its true value?                                                                                                      | NA                   |                                                                                                                       |
|                                                 | 3.4 If Y/PY/NI to 3.3: Is it likely that missingness in the outcome depended on its true value?                                                                                     | NA                   |                                                                                                                       |
|                                                 | <b>Risk of bias judgement</b>                                                                                                                                                       | <b>Low</b>           |                                                                                                                       |
| <b>Bias in measurement of the outcome</b>       | 4.1 Was the method of measuring the outcome inappropriate?                                                                                                                          | PN                   | “These roentgenograms were graded for atelectasis by a chest radiologist who did not know the treatment assignments.” |
|                                                 | 4.2 Could measurement or ascertainment of the outcome have differed between intervention groups?                                                                                    | PY                   |                                                                                                                       |
|                                                 | 4.3 Were outcome assessors aware of the intervention received by study participants?                                                                                                | NA                   |                                                                                                                       |
|                                                 | 4.4 If Y/PY/NI to 4.3: Could assessment of the outcome have been influenced by knowledge of intervention received?                                                                  | NA                   |                                                                                                                       |
|                                                 | 4.5 If Y/PY/NI to 4.4: Is it likely that assessment of the outcome was influenced by knowledge of intervention received?                                                            | NA                   |                                                                                                                       |
|                                                 | <b>Risk of bias judgement</b>                                                                                                                                                       | <b>High</b>          |                                                                                                                       |
| <b>Bias in selection of the reported result</b> | 5.1 Were the data that produced this result analysed in accordance with a pre-specified analysis plan that was finalized before unblinded outcome data were available for analysis? | PY                   |                                                                                                                       |

|                             |                                                                                                                   |             |  |
|-----------------------------|-------------------------------------------------------------------------------------------------------------------|-------------|--|
|                             | 5.2 ... multiple eligible outcome measurements (e.g. scales, definitions, time points) within the outcome domain? | PN          |  |
|                             | 5.3 ... multiple eligible analyses of the data?                                                                   | PN          |  |
|                             | <b>Risk of bias judgement</b>                                                                                     | <b>Low</b>  |  |
| <b>Overall risk of bias</b> | <b>Risk of bias judgement</b>                                                                                     | <b>High</b> |  |

|                                                           |                                                                                                                         |                 |                                                                                                                                                                               |
|-----------------------------------------------------------|-------------------------------------------------------------------------------------------------------------------------|-----------------|-------------------------------------------------------------------------------------------------------------------------------------------------------------------------------|
| <b>Study</b>                                              | Michalopoulos                                                                                                           |                 |                                                                                                                                                                               |
| <b>Domain</b>                                             | <b>Signalling question</b>                                                                                              | <b>Response</b> | <b>Comments</b>                                                                                                                                                               |
| <b>Bias arising from the randomization process</b>        | 1.1 Was the allocation sequence random?                                                                                 | NI              | “Patients were randomly assigned to receive zero PEEP (Group A, n=22), 5 cmH2O PEEP (Group B, n=24), or 10 cmH2O PEEP (Group C, n=21) during mechanical ventilatory support.” |
|                                                           | 1.2 Was the allocation sequence concealed until participants were enrolled and assigned to interventions?               | PN              |                                                                                                                                                                               |
|                                                           | 1.3 Did baseline differences between intervention groups suggest a problem with the randomization process?              | N               |                                                                                                                                                                               |
|                                                           | <b>Risk of bias judgement</b>                                                                                           | <b>High</b>     |                                                                                                                                                                               |
| <b>Bias due to deviations from intended interventions</b> | 2.1. Were participants aware of their assigned intervention during the trial?                                           | PN              |                                                                                                                                                                               |
|                                                           | 2.2. Were carers and people delivering the interventions aware of participants' assigned intervention during the trial? | PY              |                                                                                                                                                                               |

|                                           |                                                                                                                                                                        |                      |  |
|-------------------------------------------|------------------------------------------------------------------------------------------------------------------------------------------------------------------------|----------------------|--|
|                                           | 2.3. If Y/PY/NI to 2.1 or 2.2: Were there deviations from the intended intervention that arose because of the experimental context?                                    | NI                   |  |
|                                           | 2.4 If Y/PY to 2.3: Were these deviations likely to have affected the outcome?                                                                                         | NA                   |  |
|                                           | 2.5. If Y/PY/NI to 2.4: Were these deviations from intended intervention balanced between groups?                                                                      | NA                   |  |
|                                           | 2.6 Was an appropriate analysis used to estimate the effect of assignment to intervention?                                                                             | Y                    |  |
|                                           | 2.7 If N/PN/NI to 2.6: Was there potential for a substantial impact (on the result) of the failure to analyse participants in the group to which they were randomized? | NA                   |  |
|                                           | <b>Risk of bias judgement</b>                                                                                                                                          | <b>Some concerns</b> |  |
| <b>Bias due to missing outcome data</b>   | 3.1 Were data for this outcome available for all, or nearly all, participants randomized?                                                                              | Y                    |  |
|                                           | 3.2 If N/PN/NI to 3.1: Is there evidence that result was not biased by missing outcome data?                                                                           | NA                   |  |
|                                           | 3.3 If N/PN to 3.2: Could missingness in the outcome depend on its true value?                                                                                         | NA                   |  |
|                                           | 3.4 If Y/PY/NI to 3.3: Is it likely that missingness in the outcome depended on its true value?                                                                        | NA                   |  |
|                                           | <b>Risk of bias judgement</b>                                                                                                                                          | <b>Low</b>           |  |
| <b>Bias in measurement of the outcome</b> | 4.1 Was the method of measuring the outcome inappropriate?                                                                                                             | PN                   |  |
|                                           | 4.2 Could measurement or ascertainment of the outcome have differed between intervention groups?                                                                       | PY                   |  |
|                                           | 4.3 Were outcome assessors aware of the intervention received by study participants?                                                                                   | NA                   |  |
|                                           | 4.4 If Y/PY/NI to 4.3: Could assessment of the outcome have been influenced by knowledge of intervention received?                                                     | NA                   |  |

|                                                 |                                                                                                                                                                                     |             |  |
|-------------------------------------------------|-------------------------------------------------------------------------------------------------------------------------------------------------------------------------------------|-------------|--|
|                                                 | 4.5 If Y/PY/NI to 4.4: Is it likely that assessment of the outcome was influenced by knowledge of intervention received?                                                            | NA          |  |
|                                                 | <b>Risk of bias judgement</b>                                                                                                                                                       | <b>High</b> |  |
| <b>Bias in selection of the reported result</b> | 5.1 Were the data that produced this result analysed in accordance with a pre-specified analysis plan that was finalized before unblinded outcome data were available for analysis? | PY          |  |
|                                                 | 5.2 ... multiple eligible outcome measurements (e.g. scales, definitions, time points) within the outcome domain?                                                                   | PN          |  |
|                                                 | 5.3 ... multiple eligible analyses of the data?                                                                                                                                     | PN          |  |
|                                                 | <b>Risk of bias judgement</b>                                                                                                                                                       | <b>Low</b>  |  |
| <b>Overall risk of bias</b>                     | <b>Risk of bias judgement</b>                                                                                                                                                       | <b>High</b> |  |

|                                                    |                                                                                                            |                 |                                                                                                                                                                                                                                                              |
|----------------------------------------------------|------------------------------------------------------------------------------------------------------------|-----------------|--------------------------------------------------------------------------------------------------------------------------------------------------------------------------------------------------------------------------------------------------------------|
| <b>Study</b>                                       | Murphy                                                                                                     |                 |                                                                                                                                                                                                                                                              |
| <b>Domain</b>                                      | <b>Signalling question</b>                                                                                 | <b>Response</b> | <b>Comments</b>                                                                                                                                                                                                                                              |
| <b>Bias arising from the randomization process</b> | 1.1 Was the allocation sequence random?                                                                    | NI              | “After admission to the intensive care unit and after hematologic evaluations, patients in both groups were randomized to receive either 10 cm H2O of PEEP beginning 1 hour after the completion of the operation or no PEEP, and were studied for 8 hours.” |
|                                                    | 1.2 Was the allocation sequence concealed until participants were enrolled and assigned to interventions?  | PN              |                                                                                                                                                                                                                                                              |
|                                                    | 1.3 Did baseline differences between intervention groups suggest a problem with the randomization process? | NI              |                                                                                                                                                                                                                                                              |



|                                                           |                                                                                                                                                                        |             |  |
|-----------------------------------------------------------|------------------------------------------------------------------------------------------------------------------------------------------------------------------------|-------------|--|
|                                                           | <b>Risk of bias judgement</b>                                                                                                                                          | <b>High</b> |  |
| <b>Bias due to deviations from intended interventions</b> | 2.1. Were participants aware of their assigned intervention during the trial?                                                                                          | PN          |  |
|                                                           | 2.2. Were carers and people delivering the interventions aware of participants' assigned intervention during the trial?                                                | PY          |  |
|                                                           | 2.3. If Y/PY/NI to 2.1 or 2.2: Were there deviations from the intended intervention that arose because of the experimental context?                                    | NI          |  |
|                                                           | 2.4 If Y/PY to 2.3: Were these deviations likely to have affected the outcome?                                                                                         | NA          |  |
|                                                           | 2.5. If Y/PY/NI to 2.4: Were these deviations from intended intervention balanced between groups?                                                                      | NA          |  |
|                                                           | 2.6 Was an appropriate analysis used to estimate the effect of assignment to intervention?                                                                             | NI          |  |
|                                                           | 2.7 If N/PN/NI to 2.6: Was there potential for a substantial impact (on the result) of the failure to analyse participants in the group to which they were randomized? | NI          |  |
|                                                           | <b>Risk of bias judgement</b>                                                                                                                                          | <b>High</b> |  |
| <b>Bias due to missing outcome data</b>                   | 3.1 Were data for this outcome available for all, or nearly all, participants randomized?                                                                              | NI          |  |
|                                                           | 3.2 If N/PN/NI to 3.1: Is there evidence that result was not biased by missing outcome data?                                                                           | N           |  |
|                                                           | 3.3 If N/PN to 3.2: Could missingness in the outcome depend on its true value?                                                                                         | NI          |  |
|                                                           | 3.4 If Y/PY/NI to 3.3: Is it likely that missingness in the outcome depended on its true value?                                                                        | NI          |  |
|                                                           | <b>Risk of bias judgement</b>                                                                                                                                          | <b>High</b> |  |
| <b>Bias in measurement of the outcome</b>                 | 4.1 Was the method of measuring the outcome inappropriate?                                                                                                             | NI          |  |

|                                                 |                                                                                                                                                                                     |                      |  |
|-------------------------------------------------|-------------------------------------------------------------------------------------------------------------------------------------------------------------------------------------|----------------------|--|
|                                                 | 4.2 Could measurement or ascertainment of the outcome have differed between intervention groups?                                                                                    | PY                   |  |
|                                                 | 4.3 Were outcome assessors aware of the intervention received by study participants?                                                                                                | NA                   |  |
|                                                 | 4.4 If Y/PY/NI to 4.3: Could assessment of the outcome have been influenced by knowledge of intervention received?                                                                  | NA                   |  |
|                                                 | 4.5 If Y/PY/NI to 4.4: Is it likely that assessment of the outcome was influenced by knowledge of intervention received?                                                            | NA                   |  |
|                                                 | <b>Risk of bias judgement</b>                                                                                                                                                       | <b>High</b>          |  |
| <b>Bias in selection of the reported result</b> | 5.1 Were the data that produced this result analysed in accordance with a pre-specified analysis plan that was finalized before unblinded outcome data were available for analysis? | NI                   |  |
|                                                 | 5.2 ... multiple eligible outcome measurements (e.g. scales, definitions, time points) within the outcome domain?                                                                   | NI                   |  |
|                                                 | 5.3 ... multiple eligible analyses of the data?                                                                                                                                     | NI                   |  |
|                                                 | <b>Risk of bias judgement</b>                                                                                                                                                       | <b>Some concerns</b> |  |
| <b>Overall risk of bias</b>                     | <b>Risk of bias judgement</b>                                                                                                                                                       | <b>High</b>          |  |

|                                                    |                                         |                 |                 |
|----------------------------------------------------|-----------------------------------------|-----------------|-----------------|
| <b>Study</b>                                       | Nelson                                  |                 |                 |
| <b>Domain</b>                                      | <b>Signalling question</b>              | <b>Response</b> | <b>Comments</b> |
| <b>Bias arising from the randomization process</b> | 1.1 Was the allocation sequence random? | NI              |                 |

|                                                           |                                                                                                                                                                        |                      |                                                                   |
|-----------------------------------------------------------|------------------------------------------------------------------------------------------------------------------------------------------------------------------------|----------------------|-------------------------------------------------------------------|
|                                                           | 1.2 Was the allocation sequence concealed until participants were enrolled and assigned to interventions?                                                              | PN                   | “Patients were assigned randomly to one of two treatment groups.” |
|                                                           | 1.3 Did baseline differences between intervention groups suggest a problem with the randomization process?                                                             | N                    |                                                                   |
|                                                           | <b>Risk of bias judgement</b>                                                                                                                                          | <b>High</b>          |                                                                   |
| <b>Bias due to deviations from intended interventions</b> | 2.1. Were participants aware of their assigned intervention during the trial?                                                                                          | PN                   |                                                                   |
|                                                           | 2.2. Were carers and people delivering the interventions aware of participants' assigned intervention during the trial?                                                | PY                   |                                                                   |
|                                                           | 2.3. If Y/PY/NI to 2.1 or 2.2: Were there deviations from the intended intervention that arose because of the experimental context?                                    | NI                   |                                                                   |
|                                                           | 2.4 If Y/PY to 2.3: Were these deviations likely to have affected the outcome?                                                                                         | NA                   |                                                                   |
|                                                           | 2.5. If Y/PY/NI to 2.4: Were these deviations from intended intervention balanced between groups?                                                                      | NA                   |                                                                   |
|                                                           | 2.6 Was an appropriate analysis used to estimate the effect of assignment to intervention?                                                                             | Y                    |                                                                   |
|                                                           | 2.7 If N/PN/NI to 2.6: Was there potential for a substantial impact (on the result) of the failure to analyse participants in the group to which they were randomized? | NA                   |                                                                   |
|                                                           | <b>Risk of bias judgement</b>                                                                                                                                          | <b>Some concerns</b> |                                                                   |
| <b>Bias due to missing outcome data</b>                   | 3.1 Were data for this outcome available for all, or nearly all, participants randomized?                                                                              | Y                    |                                                                   |
|                                                           | 3.2 If N/PN/NI to 3.1: Is there evidence that result was not biased by missing outcome data?                                                                           | NA                   |                                                                   |
|                                                           | 3.3 If N/PN to 3.2: Could missingness in the outcome depend on its true value?                                                                                         | NA                   |                                                                   |
|                                                           | 3.4 If Y/PY/NI to 3.3: Is it likely that missingness in the outcome depended on its true value?                                                                        | NA                   |                                                                   |

|                                                 |                                                                                                                                                                                     |             |  |
|-------------------------------------------------|-------------------------------------------------------------------------------------------------------------------------------------------------------------------------------------|-------------|--|
|                                                 | <b>Risk of bias judgement</b>                                                                                                                                                       | <b>Low</b>  |  |
| <b>Bias in measurement of the outcome</b>       | 4.1 Was the method of measuring the outcome inappropriate?                                                                                                                          | N           |  |
|                                                 | 4.2 Could measurement or ascertainment of the outcome have differed between intervention groups?                                                                                    | PY          |  |
|                                                 | 4.3 Were outcome assessors aware of the intervention received by study participants?                                                                                                | NA          |  |
|                                                 | 4.4 If Y/PY/NI to 4.3: Could assessment of the outcome have been influenced by knowledge of intervention received?                                                                  | NA          |  |
|                                                 | 4.5 If Y/PY/NI to 4.4: Is it likely that assessment of the outcome was influenced by knowledge of intervention received?                                                            | NA          |  |
|                                                 | <b>Risk of bias judgement</b>                                                                                                                                                       | <b>High</b> |  |
| <b>Bias in selection of the reported result</b> | 5.1 Were the data that produced this result analysed in accordance with a pre-specified analysis plan that was finalized before unblinded outcome data were available for analysis? | Y           |  |
|                                                 | 5.2 ... multiple eligible outcome measurements (e.g. scales, definitions, time points) within the outcome domain?                                                                   | PN          |  |
|                                                 | 5.3 ... multiple eligible analyses of the data?                                                                                                                                     | PN          |  |
|                                                 | <b>Risk of bias judgement</b>                                                                                                                                                       | <b>Low</b>  |  |
| <b>Overall risk of bias</b>                     | <b>Risk of bias judgement</b>                                                                                                                                                       | <b>High</b> |  |

|              |      |
|--------------|------|
| <b>Study</b> | Pepe |
|--------------|------|

| Domain                                                    | Signalling question                                                                                                                                                    | Response             | Comments                                                                                                                                                          |
|-----------------------------------------------------------|------------------------------------------------------------------------------------------------------------------------------------------------------------------------|----------------------|-------------------------------------------------------------------------------------------------------------------------------------------------------------------|
| <b>Bias arising from the randomization process</b>        | 1.1 Was the allocation sequence random?                                                                                                                                | PY                   | “We randomly assigned patients to receive either no PEEP (control) or PEEP at a level of 8 cmH2O (early PEEP). [...] Random permuted blocks of size 4 were used.” |
|                                                           | 1.2 Was the allocation sequence concealed until participants were enrolled and assigned to interventions?                                                              | NI                   |                                                                                                                                                                   |
|                                                           | 1.3 Did baseline differences between intervention groups suggest a problem with the randomization process?                                                             | N                    |                                                                                                                                                                   |
|                                                           | <b>Risk of bias judgement</b>                                                                                                                                          | <b>Some concerns</b> |                                                                                                                                                                   |
| <b>Bias due to deviations from intended interventions</b> | 2.1. Were participants aware of their assigned intervention during the trial?                                                                                          | PN                   |                                                                                                                                                                   |
|                                                           | 2.2. Were carers and people delivering the interventions aware of participants' assigned intervention during the trial?                                                | PY                   |                                                                                                                                                                   |
|                                                           | 2.3. If Y/PY/NI to 2.1 or 2.2: Were there deviations from the intended intervention that arose because of the experimental context?                                    | NI                   |                                                                                                                                                                   |
|                                                           | 2.4 If Y/PY to 2.3: Were these deviations likely to have affected the outcome?                                                                                         | NA                   |                                                                                                                                                                   |
|                                                           | 2.5. If Y/PY/NI to 2.4: Were these deviations from intended intervention balanced between groups?                                                                      | NA                   |                                                                                                                                                                   |
|                                                           | 2.6 Was an appropriate analysis used to estimate the effect of assignment to intervention?                                                                             | Y                    |                                                                                                                                                                   |
|                                                           | 2.7 If N/PN/NI to 2.6: Was there potential for a substantial impact (on the result) of the failure to analyse participants in the group to which they were randomized? | NA                   |                                                                                                                                                                   |
|                                                           | <b>Risk of bias judgement</b>                                                                                                                                          | <b>Some concerns</b> |                                                                                                                                                                   |
| <b>Bias due to missing outcome data</b>                   | 3.1 Were data for this outcome available for all, or nearly all, participants randomized?                                                                              | Y                    |                                                                                                                                                                   |

|                                                 |                                                                                                                                                                                     |             |  |
|-------------------------------------------------|-------------------------------------------------------------------------------------------------------------------------------------------------------------------------------------|-------------|--|
|                                                 | 3.2 If N/PN/NI to 3.1: Is there evidence that result was not biased by missing outcome data?                                                                                        | NA          |  |
|                                                 | 3.3 If N/PN to 3.2: Could missingness in the outcome depend on its true value?                                                                                                      | NA          |  |
|                                                 | 3.4 If Y/PY/NI to 3.3: Is it likely that missingness in the outcome depended on its true value?                                                                                     | NA          |  |
|                                                 | <b>Risk of bias judgement</b>                                                                                                                                                       | <b>Low</b>  |  |
| <b>Bias in measurement of the outcome</b>       | 4.1 Was the method of measuring the outcome inappropriate?                                                                                                                          | PN          |  |
|                                                 | 4.2 Could measurement or ascertainment of the outcome have differed between intervention groups?                                                                                    | PY          |  |
|                                                 | 4.3 Were outcome assessors aware of the intervention received by study participants?                                                                                                | NA          |  |
|                                                 | 4.4 If Y/PY/NI to 4.3: Could assessment of the outcome have been influenced by knowledge of intervention received?                                                                  | NA          |  |
|                                                 | 4.5 If Y/PY/NI to 4.4: Is it likely that assessment of the outcome was influenced by knowledge of intervention received?                                                            | NA          |  |
|                                                 | <b>Risk of bias judgement</b>                                                                                                                                                       | <b>High</b> |  |
| <b>Bias in selection of the reported result</b> | 5.1 Were the data that produced this result analysed in accordance with a pre-specified analysis plan that was finalized before unblinded outcome data were available for analysis? | Y           |  |
|                                                 | 5.2 ... multiple eligible outcome measurements (e.g. scales, definitions, time points) within the outcome domain?                                                                   | PN          |  |
|                                                 | 5.3 ... multiple eligible analyses of the data?                                                                                                                                     | PN          |  |
|                                                 | <b>Risk of bias judgement</b>                                                                                                                                                       | <b>Low</b>  |  |
| <b>Overall risk of bias</b>                     | <b>Risk of bias judgement</b>                                                                                                                                                       | <b>High</b> |  |

|                                                           |                                                                                                                                     |                 |                                                                                                                                                                                                                                                                                                                                                                                            |
|-----------------------------------------------------------|-------------------------------------------------------------------------------------------------------------------------------------|-----------------|--------------------------------------------------------------------------------------------------------------------------------------------------------------------------------------------------------------------------------------------------------------------------------------------------------------------------------------------------------------------------------------------|
| <b>Study</b>                                              | Relax                                                                                                                               |                 |                                                                                                                                                                                                                                                                                                                                                                                            |
| <b>Domain</b>                                             | <b>Signalling question</b>                                                                                                          | <b>Response</b> | <b>Comments</b>                                                                                                                                                                                                                                                                                                                                                                            |
| <b>Bias arising from the randomization process</b>        | 1.1 Was the allocation sequence random?                                                                                             | Y               | “This was a randomized clinical trial conducted at the ICUs of 8 hospitals in the Netherlands.”                                                                                                                                                                                                                                                                                            |
|                                                           | 1.2 Was the allocation sequence concealed until participants were enrolled and assigned to interventions?                           | PY              | “Patients were randomized in a 1:1 ratio to a lower or higher PEEP strategy group. The local investigators performed randomization using a central, dedicated, password-protected, encrypted, web-based automated randomization system (SSL-encrypted website with ALEA software, TenALEA Consortium). Randomization was conducted using random block sizes with a maximum of 8 patients.” |
|                                                           | 1.3 Did baseline differences between intervention groups suggest a problem with the randomization process?                          | N               |                                                                                                                                                                                                                                                                                                                                                                                            |
|                                                           | <b>Risk of bias judgement</b>                                                                                                       | <b>Low</b>      |                                                                                                                                                                                                                                                                                                                                                                                            |
| <b>Bias due to deviations from intended interventions</b> | 2.1. Were participants aware of their assigned intervention during the trial?                                                       | PN              |                                                                                                                                                                                                                                                                                                                                                                                            |
|                                                           | 2.2. Were carers and people delivering the interventions aware of participants' assigned intervention during the trial?             | Y               |                                                                                                                                                                                                                                                                                                                                                                                            |
|                                                           | 2.3. If Y/PY/NI to 2.1 or 2.2: Were there deviations from the intended intervention that arose because of the experimental context? | PN              |                                                                                                                                                                                                                                                                                                                                                                                            |

|                                           |                                                                                                                                                                        |            |                                                                                                                                                                                                |
|-------------------------------------------|------------------------------------------------------------------------------------------------------------------------------------------------------------------------|------------|------------------------------------------------------------------------------------------------------------------------------------------------------------------------------------------------|
|                                           | 2.4 If Y/PY to 2.3: Were these deviations likely to have affected the outcome?                                                                                         | NA         |                                                                                                                                                                                                |
|                                           | 2.5. If Y/PY/NI to 2.4: Were these deviations from intended intervention balanced between groups?                                                                      | NA         |                                                                                                                                                                                                |
|                                           | 2.6 Was an appropriate analysis used to estimate the effect of assignment to intervention?                                                                             | Y          | “In all analyses, patients were analyzed according to their randomization group, with the exception of those who withdrew informed consent or were lost to follow-up in the first 28 days.”    |
|                                           | 2.7 If N/PN/NI to 2.6: Was there potential for a substantial impact (on the result) of the failure to analyse participants in the group to which they were randomized? | NA         |                                                                                                                                                                                                |
|                                           | <b>Risk of bias judgement</b>                                                                                                                                          | <b>Low</b> |                                                                                                                                                                                                |
| <b>Bias due to missing outcome data</b>   | 3.1 Were data for this outcome available for all, or nearly all, participants randomized?                                                                              | Y          |                                                                                                                                                                                                |
|                                           | 3.2 If N/PN/NI to 3.1: Is there evidence that result was not biased by missing outcome data?                                                                           | NA         |                                                                                                                                                                                                |
|                                           | 3.3 If N/PN to 3.2: Could missingness in the outcome depend on its true value?                                                                                         | NA         |                                                                                                                                                                                                |
|                                           | 3.4 If Y/PY/NI to 3.3: Is it likely that missingness in the outcome depended on its true value?                                                                        | NA         |                                                                                                                                                                                                |
|                                           | <b>Risk of bias judgement</b>                                                                                                                                          | <b>Low</b> |                                                                                                                                                                                                |
| <b>Bias in measurement of the outcome</b> | 4.1 Was the method of measuring the outcome inappropriate?                                                                                                             | N          | “An independent committee oversaw conduct of the trial and adverse events while remaining blind to the primary end point at 3 predefined time points, and recommended the trial be continued.” |
|                                           | 4.2 Could measurement or ascertainment of the outcome have differed between intervention groups?                                                                       | PN         |                                                                                                                                                                                                |



|                                                 |                                                                                                                                                                                     |                      |                                                                                                                                                                                                                                                                                                 |
|-------------------------------------------------|-------------------------------------------------------------------------------------------------------------------------------------------------------------------------------------|----------------------|-------------------------------------------------------------------------------------------------------------------------------------------------------------------------------------------------------------------------------------------------------------------------------------------------|
|                                                 | 4.3 Were outcome assessors aware of the intervention received by study participants?                                                                                                | PY                   |                                                                                                                                                                                                                                                                                                 |
|                                                 | 4.4 If Y/PY/NI to 4.3: Could assessment of the outcome have been influenced by knowledge of intervention received?                                                                  | PY                   |                                                                                                                                                                                                                                                                                                 |
|                                                 | 4.5 If Y/PY/NI to 4.4: Is it likely that assessment of the outcome was influenced by knowledge of intervention received?                                                            | PN                   |                                                                                                                                                                                                                                                                                                 |
|                                                 | <b>Risk of bias judgement</b>                                                                                                                                                       | <b>Some concerns</b> |                                                                                                                                                                                                                                                                                                 |
| <b>Bias in selection of the reported result</b> | 5.1 Were the data that produced this result analysed in accordance with a pre-specified analysis plan that was finalized before unblinded outcome data were available for analysis? | Y                    | “The protocol has been published,15 and the final protocol is available in Online Resource 1. An updated statistical analysis plan was written before closing the database; the final plan and a table describing the changes to the original study design are available in Online Resource 2.” |
|                                                 | 5.2 ... multiple eligible outcome measurements (e.g. scales, definitions, time points) within the outcome domain?                                                                   | PN                   |                                                                                                                                                                                                                                                                                                 |
|                                                 | 5.3 ... multiple eligible analyses of the data?                                                                                                                                     | PN                   |                                                                                                                                                                                                                                                                                                 |
|                                                 | <b>Risk of bias judgement</b>                                                                                                                                                       | <b>Low</b>           |                                                                                                                                                                                                                                                                                                 |
| <b>Overall risk of bias</b>                     | <b>Risk of bias judgement</b>                                                                                                                                                       | <b>Some concerns</b> |                                                                                                                                                                                                                                                                                                 |

|               |                            |                 |                 |
|---------------|----------------------------|-----------------|-----------------|
| <b>Study</b>  | Vigil                      |                 |                 |
| <b>Domain</b> | <b>Signalling question</b> | <b>Response</b> | <b>Comments</b> |

|                                                           |                                                                                                                                                                        |                      |                                                                                                       |
|-----------------------------------------------------------|------------------------------------------------------------------------------------------------------------------------------------------------------------------------|----------------------|-------------------------------------------------------------------------------------------------------|
| <b>Bias arising from the randomization process</b>        | 1.1 Was the allocation sequence random?                                                                                                                                | PY                   | “Forty-four trauma patients were randomized to receive 5-cm H2O PEEP (PEEP) or 0-cm H2O PEEP (ZEEP).” |
|                                                           | 1.2 Was the allocation sequence concealed until participants were enrolled and assigned to interventions?                                                              | NI                   |                                                                                                       |
|                                                           | 1.3 Did baseline differences between intervention groups suggest a problem with the randomization process?                                                             | N                    |                                                                                                       |
|                                                           | <b>Risk of bias judgement</b>                                                                                                                                          | <b>Some concerns</b> |                                                                                                       |
| <b>Bias due to deviations from intended interventions</b> | 2.1. Were participants aware of their assigned intervention during the trial?                                                                                          | PN                   |                                                                                                       |
|                                                           | 2.2. Were carers and people delivering the interventions aware of participants' assigned intervention during the trial?                                                | PY                   |                                                                                                       |
|                                                           | 2.3. If Y/PY/NI to 2.1 or 2.2: Were there deviations from the intended intervention that arose because of the experimental context?                                    | NI                   |                                                                                                       |
|                                                           | 2.4 If Y/PY to 2.3: Were these deviations likely to have affected the outcome?                                                                                         | NA                   |                                                                                                       |
|                                                           | 2.5. If Y/PY/NI to 2.4: Were these deviations from intended intervention balanced between groups?                                                                      | NA                   |                                                                                                       |
|                                                           | 2.6 Was an appropriate analysis used to estimate the effect of assignment to intervention?                                                                             | NI                   |                                                                                                       |
|                                                           | 2.7 If N/PN/NI to 2.6: Was there potential for a substantial impact (on the result) of the failure to analyse participants in the group to which they were randomized? | NI                   |                                                                                                       |
|                                                           | <b>Risk of bias judgement</b>                                                                                                                                          | <b>High</b>          |                                                                                                       |
| <b>Bias due to missing outcome data</b>                   | 3.1 Were data for this outcome available for all, or nearly all, participants randomized?                                                                              | Y                    |                                                                                                       |
|                                                           | 3.2 If N/PN/NI to 3.1: Is there evidence that result was not biased by missing outcome data?                                                                           | NA                   |                                                                                                       |
|                                                           | 3.3 If N/PN to 3.2: Could missingness in the outcome depend on its true value?                                                                                         | NA                   |                                                                                                       |

|                                                 |                                                                                                                                                                                     |             |  |
|-------------------------------------------------|-------------------------------------------------------------------------------------------------------------------------------------------------------------------------------------|-------------|--|
|                                                 | 3.4 If Y/PY/NI to 3.3: Is it likely that missingness in the outcome depended on its true value?                                                                                     | NA          |  |
|                                                 | <b>Risk of bias judgement</b>                                                                                                                                                       | <b>Low</b>  |  |
| <b>Bias in measurement of the outcome</b>       | 4.1 Was the method of measuring the outcome inappropriate?                                                                                                                          | N           |  |
|                                                 | 4.2 Could measurement or ascertainment of the outcome have differed between intervention groups?                                                                                    | PY          |  |
|                                                 | 4.3 Were outcome assessors aware of the intervention received by study participants?                                                                                                | NA          |  |
|                                                 | 4.4 If Y/PY/NI to 4.3: Could assessment of the outcome have been influenced by knowledge of intervention received?                                                                  | NA          |  |
|                                                 | 4.5 If Y/PY/NI to 4.4: Is it likely that assessment of the outcome was influenced by knowledge of intervention received?                                                            | NA          |  |
|                                                 | <b>Risk of bias judgement</b>                                                                                                                                                       | <b>High</b> |  |
| <b>Bias in selection of the reported result</b> | 5.1 Were the data that produced this result analysed in accordance with a pre-specified analysis plan that was finalized before unblinded outcome data were available for analysis? | Y           |  |
|                                                 | 5.2 ... multiple eligible outcome measurements (e.g. scales, definitions, time points) within the outcome domain?                                                                   | PN          |  |
|                                                 | 5.3 ... multiple eligible analyses of the data?                                                                                                                                     | PN          |  |
|                                                 | <b>Risk of bias judgement</b>                                                                                                                                                       | <b>Low</b>  |  |
| <b>Overall risk of bias</b>                     | <b>Risk of bias judgement</b>                                                                                                                                                       | <b>High</b> |  |

| Study                                                     | Weigelt                                                                                                                                                                |                      |                                                                                                                                           |
|-----------------------------------------------------------|------------------------------------------------------------------------------------------------------------------------------------------------------------------------|----------------------|-------------------------------------------------------------------------------------------------------------------------------------------|
| Domain                                                    | Signalling question                                                                                                                                                    | Response             | Comments                                                                                                                                  |
| <b>Bias arising from the randomization process</b>        | 1.1 Was the allocation sequence random?                                                                                                                                | NI                   | “This prospective randomized study was designed to determine the effect of early therapeutic PEEP on the incidence and severity of ARDS.” |
|                                                           | 1.2 Was the allocation sequence concealed until participants were enrolled and assigned to interventions?                                                              | PN                   |                                                                                                                                           |
|                                                           | 1.3 Did baseline differences between intervention groups suggest a problem with the randomization process?                                                             | N                    |                                                                                                                                           |
|                                                           | <b>Risk of bias judgement</b>                                                                                                                                          | <b>High</b>          |                                                                                                                                           |
| <b>Bias due to deviations from intended interventions</b> | 2.1. Were participants aware of their assigned intervention during the trial?                                                                                          | PN                   |                                                                                                                                           |
|                                                           | 2.2. Were carers and people delivering the interventions aware of participants' assigned intervention during the trial?                                                | PY                   |                                                                                                                                           |
|                                                           | 2.3. If Y/PY/NI to 2.1 or 2.2: Were there deviations from the intended intervention that arose because of the experimental context?                                    | NI                   |                                                                                                                                           |
|                                                           | 2.4 If Y/PY to 2.3: Were these deviations likely to have affected the outcome?                                                                                         | NA                   |                                                                                                                                           |
|                                                           | 2.5. If Y/PY/NI to 2.4: Were these deviations from intended intervention balanced between groups?                                                                      | NA                   |                                                                                                                                           |
|                                                           | 2.6 Was an appropriate analysis used to estimate the effect of assignment to intervention?                                                                             | PY                   |                                                                                                                                           |
|                                                           | 2.7 If N/PN/NI to 2.6: Was there potential for a substantial impact (on the result) of the failure to analyse participants in the group to which they were randomized? | NA                   |                                                                                                                                           |
|                                                           | <b>Risk of bias judgement</b>                                                                                                                                          | <b>Some concerns</b> |                                                                                                                                           |

|                                                 |                                                                                                                                                                                     |                      |  |
|-------------------------------------------------|-------------------------------------------------------------------------------------------------------------------------------------------------------------------------------------|----------------------|--|
| <b>Bias due to missing outcome data</b>         | 3.1 Were data for this outcome available for all, or nearly all, participants randomized?                                                                                           | Y                    |  |
|                                                 | 3.2 If N/PN/NI to 3.1: Is there evidence that result was not biased by missing outcome data?                                                                                        | NA                   |  |
|                                                 | 3.3 If N/PN to 3.2: Could missingness in the outcome depend on its true value?                                                                                                      | NA                   |  |
|                                                 | 3.4 If Y/PY/NI to 3.3: Is it likely that missingness in the outcome depended on its true value?                                                                                     | NA                   |  |
|                                                 | <b>Risk of bias judgement</b>                                                                                                                                                       | <b>Low</b>           |  |
| <b>Bias in measurement of the outcome</b>       | 4.1 Was the method of measuring the outcome inappropriate?                                                                                                                          | N                    |  |
|                                                 | 4.2 Could measurement or ascertainment of the outcome have differed between intervention groups?                                                                                    | PY                   |  |
|                                                 | 4.3 Were outcome assessors aware of the intervention received by study participants?                                                                                                | NA                   |  |
|                                                 | 4.4 If Y/PY/NI to 4.3: Could assessment of the outcome have been influenced by knowledge of intervention received?                                                                  | NA                   |  |
|                                                 | 4.5 If Y/PY/NI to 4.4: Is it likely that assessment of the outcome was influenced by knowledge of intervention received?                                                            | NA                   |  |
|                                                 | <b>Risk of bias judgement</b>                                                                                                                                                       | <b>High</b>          |  |
| <b>Bias in selection of the reported result</b> | 5.1 Were the data that produced this result analysed in accordance with a pre-specified analysis plan that was finalized before unblinded outcome data were available for analysis? | NI                   |  |
|                                                 | 5.2 ... multiple eligible outcome measurements (e.g. scales, definitions, time points) within the outcome domain?                                                                   | PN                   |  |
|                                                 | 5.3 ... multiple eligible analyses of the data?                                                                                                                                     | PN                   |  |
|                                                 | <b>Risk of bias judgement</b>                                                                                                                                                       | <b>Some concerns</b> |  |

|                             |                               |             |  |
|-----------------------------|-------------------------------|-------------|--|
| <b>Overall risk of bias</b> | <b>Risk of bias judgement</b> | <b>High</b> |  |
|-----------------------------|-------------------------------|-------------|--|

| <b>Study</b>                                              | Zurich                                                                                                                              |                 |                                                                                                                                                                                                                                                             |
|-----------------------------------------------------------|-------------------------------------------------------------------------------------------------------------------------------------|-----------------|-------------------------------------------------------------------------------------------------------------------------------------------------------------------------------------------------------------------------------------------------------------|
| <b>Domain</b>                                             | <b>Signalling question</b>                                                                                                          | <b>Response</b> | <b>Comments</b>                                                                                                                                                                                                                                             |
| <b>Bias arising from the randomization process</b>        | 1.1 Was the allocation sequence random?                                                                                             | N               | “The patients were randomized preoperatively on the basis of the last digit of their clinical history number; odd-numbered patients were assigned to the group receiving PEEP, and even-numbered patients to the group not receiving PEEP (control group).” |
|                                                           | 1.2 Was the allocation sequence concealed until participants were enrolled and assigned to interventions?                           | PN              |                                                                                                                                                                                                                                                             |
|                                                           | 1.3 Did baseline differences between intervention groups suggest a problem with the randomization process?                          | N               |                                                                                                                                                                                                                                                             |
|                                                           | <b>Risk of bias judgement</b>                                                                                                       | <b>High</b>     |                                                                                                                                                                                                                                                             |
| <b>Bias due to deviations from intended interventions</b> | 2.1. Were participants aware of their assigned intervention during the trial?                                                       | PN              |                                                                                                                                                                                                                                                             |
|                                                           | 2.2. Were carers and people delivering the interventions aware of participants' assigned intervention during the trial?             | PY              |                                                                                                                                                                                                                                                             |
|                                                           | 2.3. If Y/PY/NI to 2.1 or 2.2: Were there deviations from the intended intervention that arose because of the experimental context? | NI              |                                                                                                                                                                                                                                                             |
|                                                           | 2.4 If Y/PY to 2.3: Were these deviations likely to have affected the outcome?                                                      | NA              |                                                                                                                                                                                                                                                             |
|                                                           | 2.5. If Y/PY/NI to 2.4: Were these deviations from intended intervention balanced between groups?                                   | NA              |                                                                                                                                                                                                                                                             |

|                                                 |                                                                                                                                                                                     |                      |  |
|-------------------------------------------------|-------------------------------------------------------------------------------------------------------------------------------------------------------------------------------------|----------------------|--|
|                                                 | 2.6 Was an appropriate analysis used to estimate the effect of assignment to intervention?                                                                                          | Y                    |  |
|                                                 | 2.7 If N/PN/NI to 2.6: Was there potential for a substantial impact (on the result) of the failure to analyse participants in the group to which they were randomized?              | NA                   |  |
|                                                 | <b>Risk of bias judgement</b>                                                                                                                                                       | <b>Some concerns</b> |  |
| <b>Bias due to missing outcome data</b>         | 3.1 Were data for this outcome available for all, or nearly all, participants randomized?                                                                                           | Y                    |  |
|                                                 | 3.2 If N/PN/NI to 3.1: Is there evidence that result was not biased by missing outcome data?                                                                                        | NA                   |  |
|                                                 | 3.3 If N/PN to 3.2: Could missingness in the outcome depend on its true value?                                                                                                      | NA                   |  |
|                                                 | 3.4 If Y/PY/NI to 3.3: Is it likely that missingness in the outcome depended on its true value?                                                                                     | NA                   |  |
|                                                 | <b>Risk of bias judgement</b>                                                                                                                                                       | <b>Low</b>           |  |
| <b>Bias in measurement of the outcome</b>       | 4.1 Was the method of measuring the outcome inappropriate?                                                                                                                          | PN                   |  |
|                                                 | 4.2 Could measurement or ascertainment of the outcome have differed between intervention groups?                                                                                    | PY                   |  |
|                                                 | 4.3 Were outcome assessors aware of the intervention received by study participants?                                                                                                | NA                   |  |
|                                                 | 4.4 If Y/PY/NI to 4.3: Could assessment of the outcome have been influenced by knowledge of intervention received?                                                                  | NA                   |  |
|                                                 | 4.5 If Y/PY/NI to 4.4: Is it likely that assessment of the outcome was influenced by knowledge of intervention received?                                                            | NA                   |  |
|                                                 | <b>Risk of bias judgement</b>                                                                                                                                                       | <b>High</b>          |  |
| <b>Bias in selection of the reported result</b> | 5.1 Were the data that produced this result analysed in accordance with a pre-specified analysis plan that was finalized before unblinded outcome data were available for analysis? | PY                   |  |

|                             |                                                                                                                   |             |  |
|-----------------------------|-------------------------------------------------------------------------------------------------------------------|-------------|--|
|                             | 5.2 ... multiple eligible outcome measurements (e.g. scales, definitions, time points) within the outcome domain? | PN          |  |
|                             | 5.3 ... multiple eligible analyses of the data?                                                                   | PN          |  |
|                             | <b>Risk of bias judgement</b>                                                                                     | <b>Low</b>  |  |
| <b>Overall risk of bias</b> | <b>Risk of bias judgement</b>                                                                                     | <b>High</b> |  |



**Online Resource 6. Primary and Secondary Outcomes**

| <b>Table S8. Summary of main meta-analysis</b> |                |          |                                   |                   |                                                |                                         |                          |                          |
|------------------------------------------------|----------------|----------|-----------------------------------|-------------------|------------------------------------------------|-----------------------------------------|--------------------------|--------------------------|
| <b>Variable</b>                                | <b>Studies</b> | <b>N</b> | <b>Higher PEEP (N/total or N)</b> | <b>Lower PEEP</b> | <b>Relative effect of higher PEEP (95% CI)</b> | <b>Prediction Interval (95% CI)</b>     | <b>I<sup>2</sup> (%)</b> | <b>p (I<sup>2</sup>)</b> |
| Primary outcome                                |                |          |                                   |                   |                                                |                                         |                          |                          |
| Hospital mortality                             | 9              | 1502     | 274/760                           | 259/742           | 1.02 (0.89, 1.16)                              | 1.02 <sup>a</sup>                       | 0                        | 0.62                     |
| Secondary outcomes                             |                |          |                                   |                   |                                                |                                         |                          |                          |
| PaO <sub>2</sub> /FiO <sub>2</sub>             | 8              | 1444     | 732                               | 712               | 50.46 mmHg (33.93, 66.99)                      | 50.46 mmHg (11.87, 89.04)               | 59                       | 0.02                     |
| Hypoxemia                                      | 5              | 1320     | 121/667                           | 168/653           | 0.60 (0.40, 0.92)                              | 0.60 (-1.55, 2.75)                      | 59                       | 0.05                     |
| ARDS                                           | 6              | 1315     | 28/672                            | 54/643            | 0.50 (0.32, 0.78)                              | 0.50 (-0.26, 1.26)                      | 13                       | 0.33                     |
| A-aDO <sub>2</sub>                             | 4              | 164      | 80                                | 84                | -1.62 (-3.12, -0.11)                           | -1.62 (-9.03, 5.80)                     | 92                       | < 0.01                   |
| Compliance                                     | 3              | 189      | 101                               | 88                | 8.46 mL/cmH <sub>2</sub> O (3.11, 13.82)       | 8.46 mL/cmH <sub>2</sub> O <sup>a</sup> | 0                        | 0.82                     |
| Atelectasis                                    | 5              | 1255     | 65/632                            | 74/623            | 1.02 (0.81, 1.28)                              | 1.02 (0.38, 1.66)                       | 11                       | 0.34                     |
| Barotrauma                                     | 7              | 1372     | 38/697                            | 52/675            | 0.78 (0.55, 1.11)                              | 0.78 <sup>a</sup>                       | 0                        | 0.54                     |
| VAP                                            | 3              | 1188     | 17/601                            | 28/587            | 0.62 (0.32, 1.23)                              | 0.62 (-4.01, 5.25)                      | 23                       | 0.27                     |
| Hypotension                                    | 5              | 283      | 18/141                            | 16/142            | 1.15 (0.71, 1.84)                              | 1.15 <sup>a</sup>                       | 0                        | 0.72                     |
| CI                                             | 3              | 127      | 61                                | 66                | 0.04 L/min/m <sup>2</sup> (-0.21, 0.29)        | 0.04 <sup>a</sup>                       | 0                        | 0.93                     |
| CVP                                            | 3              | 106      | 51                                | 55                | 1.37 mmHg (0.38, 2.37)                         | 1.37 <sup>a</sup>                       | 0                        | 0.38                     |
| 24-hour postoperative bleeding                 | 2              | 601      | 81                                | 520               | 26.47 mL (-99.95, 152.89)                      | 26.47 (-251.37, 304.31)                 | 52                       | 0.15                     |
| PRBC transfusion                               | 3              | 1138     | 574                               | 564               | -0.38 units (-0.77, 0.02)                      | -0.38 <sup>a</sup>                      | 0                        | 0.77                     |
| Duration of ventilation                        | 10             | 1510     | 771                               | 739               | -0.03 (-0.27, 0.21)                            | -0.03 (-1.68, 1.62)                     | 65                       | < 0.01                   |
| ICU stay                                       | 4              | 1202     | 617                               | 585               | -1.00 days (-2.51, 0.51)                       | -1.00 (-3.20, 1.20)                     | 6                        | 0.37                     |
| Hospital stay                                  | 5              | 1245     | 629                               | 616               | -0.02 days (-0.69, 0.66)                       | -0.02 (-1.53, 1.48)                     | 26                       | 0.25                     |
| ICU mortality                                  | 5              | 1073     | 194/546                           | 172/527           | 1.09 (0.92, 1.28)                              | 1.09 <sup>a</sup>                       | 0                        | 0.74                     |
| 28-day mortality                               | 3              | 1152     | 231/583                           | 236/569           | 0.68 (0.33, 1.40)                              | 0.68 (-12.89, 14.25)                    | 89                       | < 0.01                   |

| <b>Table S8 (continued)</b>                                                                                                                                                                                                                                                                                                                                                                                                                                                                                                                                                                                                                                                                                                                                                                                                                                                                                                                                                                                                                                                                                     |                |          |                                   |                   |                                                |                                     |                          |                          |
|-----------------------------------------------------------------------------------------------------------------------------------------------------------------------------------------------------------------------------------------------------------------------------------------------------------------------------------------------------------------------------------------------------------------------------------------------------------------------------------------------------------------------------------------------------------------------------------------------------------------------------------------------------------------------------------------------------------------------------------------------------------------------------------------------------------------------------------------------------------------------------------------------------------------------------------------------------------------------------------------------------------------------------------------------------------------------------------------------------------------|----------------|----------|-----------------------------------|-------------------|------------------------------------------------|-------------------------------------|--------------------------|--------------------------|
| <b>Variable</b>                                                                                                                                                                                                                                                                                                                                                                                                                                                                                                                                                                                                                                                                                                                                                                                                                                                                                                                                                                                                                                                                                                 | <b>Studies</b> | <b>N</b> | <b>Higher PEEP (N/total or N)</b> | <b>Lower PEEP</b> | <b>Relative effect of higher PEEP (95% CI)</b> | <b>Prediction Interval (95% CI)</b> | <b>I<sup>2</sup> (%)</b> | <b>p (I<sup>2</sup>)</b> |
| <p>Abbreviations: N, number of patients; PEEP, positive end-expiratory pressure; CI, confidence interval; I<sup>2</sup>, I<sup>2</sup> test; PaO<sub>2</sub>/FiO<sub>2</sub>, arterial partial pressure of oxygen to fraction of inspired oxygen ratio; A-aDO<sub>2</sub>, alveolar-arterial oxygen pressure difference; VAP, ventilator-associated pneumonia; ARDS, acute respiratory distress syndrome; CI, cardiac index; CVP, central venous pressure; PRBC, packed red blood cells; ICU, intensive care unit.</p> <p>Total effect is expressed as risk ratio (Mantel-Haenszel method, random-effects) for hospital mortality, hypoxemia, atelectasis, barotrauma, VAP, ARDS, hypotension, ICU mortality, 28-day mortality; mean difference (inverse variance method, random-effects) for PaO<sub>2</sub>/FiO<sub>2</sub>, compliance, cardiac index, CVP, postoperative bleeding, PRBC transfusion, ICU stay, hospital stay; and standardized mean difference (inverse variance, random-effects) for A-aDO<sub>2</sub> and duration of ventilation.</p> <p><sup>a</sup>I<sup>2</sup> and tau are zero.</p> |                |          |                                   |                   |                                                |                                     |                          |                          |

### Forest plots of other secondary outcomes

Abbreviations: A-aDO<sub>2</sub>, alveolar-arterial oxygen pressure difference; SD, standard deviation; IV, inverse variance; CI, confidence interval; PEEP, positive end-expiratory pressure; M-H, Mantel-Haenszel; VAP, ventilator-associated pneumonia; CI, cardiac index; CVP, central venous pressure; PRBC, packed red blood cell transfusion; ICU, intensive care unit; ARDS, acute respiratory distress syndrome.

## A-aDO<sub>2</sub>

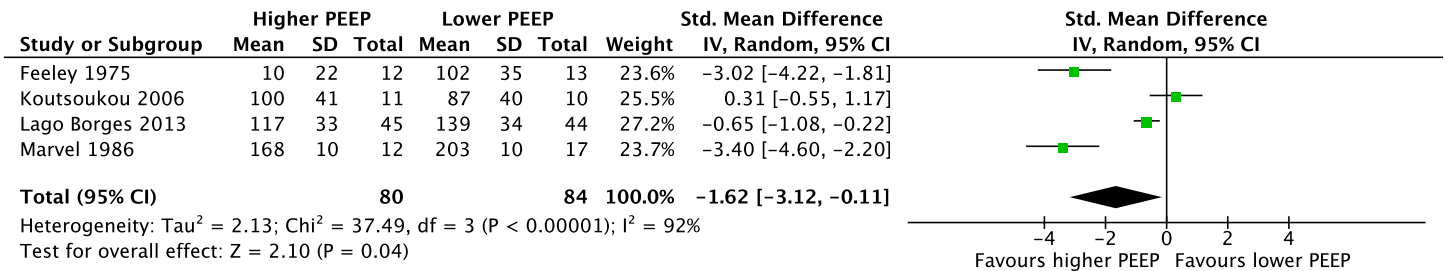

## Compliance

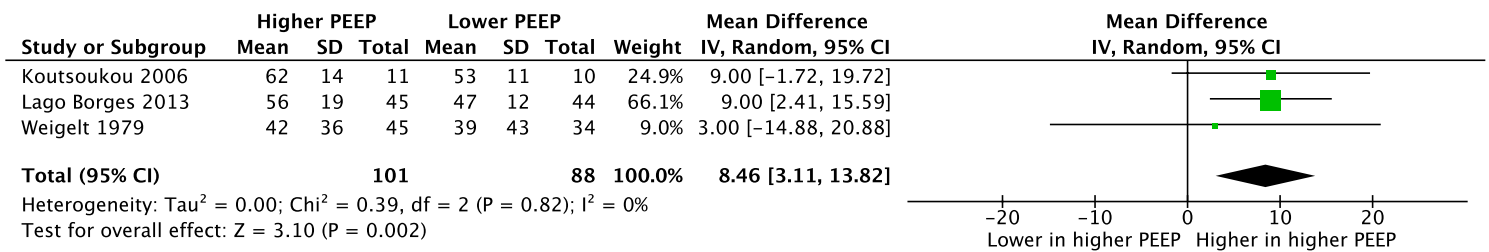

## Atelectasis

| Study or Subgroup                                                                                           | Higher PEEP |            | Lower PEEP |            | Weight        | Risk Ratio<br>M-H, Random, 95% CI |
|-------------------------------------------------------------------------------------------------------------|-------------|------------|------------|------------|---------------|-----------------------------------|
|                                                                                                             | Events      | Total      | Events     | Total      |               |                                   |
| Good 1979                                                                                                   | 9           | 10         | 12         | 14         | 44.3%         | 1.05 [0.78, 1.41]                 |
| Manzano 2008                                                                                                | 12          | 64         | 17         | 63         | 11.8%         | 0.69 [0.36, 1.33]                 |
| Michalopoulos 1998                                                                                          | 2           | 21         | 2          | 22         | 1.5%          | 1.05 [0.16, 6.77]                 |
| Pepe 1984                                                                                                   | 27          | 44         | 23         | 48         | 30.8%         | 1.28 [0.88, 1.87]                 |
| Relax 2020                                                                                                  | 15          | 493        | 20         | 476        | 11.6%         | 0.72 [0.38, 1.40]                 |
| <b>Total (95% CI)</b>                                                                                       |             | <b>632</b> |            | <b>623</b> | <b>100.0%</b> | <b>1.02 [0.81, 1.28]</b>          |
| Total events                                                                                                | 65          |            | 74         |            |               |                                   |
| Heterogeneity: $\text{Tau}^2 = 0.01$ ; $\text{Chi}^2 = 4.51$ , $\text{df} = 4$ ( $P = 0.34$ ); $I^2 = 11\%$ |             |            |            |            |               |                                   |
| Test for overall effect: $Z = 0.15$ ( $P = 0.88$ )                                                          |             |            |            |            |               |                                   |

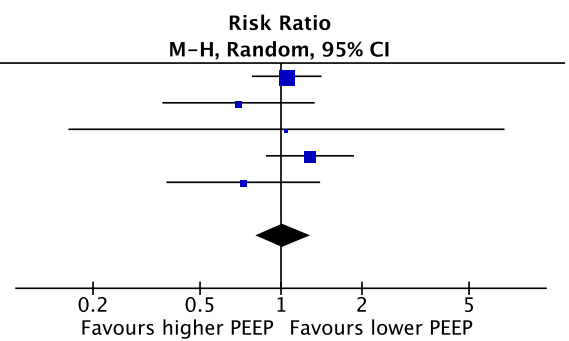

## Barotrauma

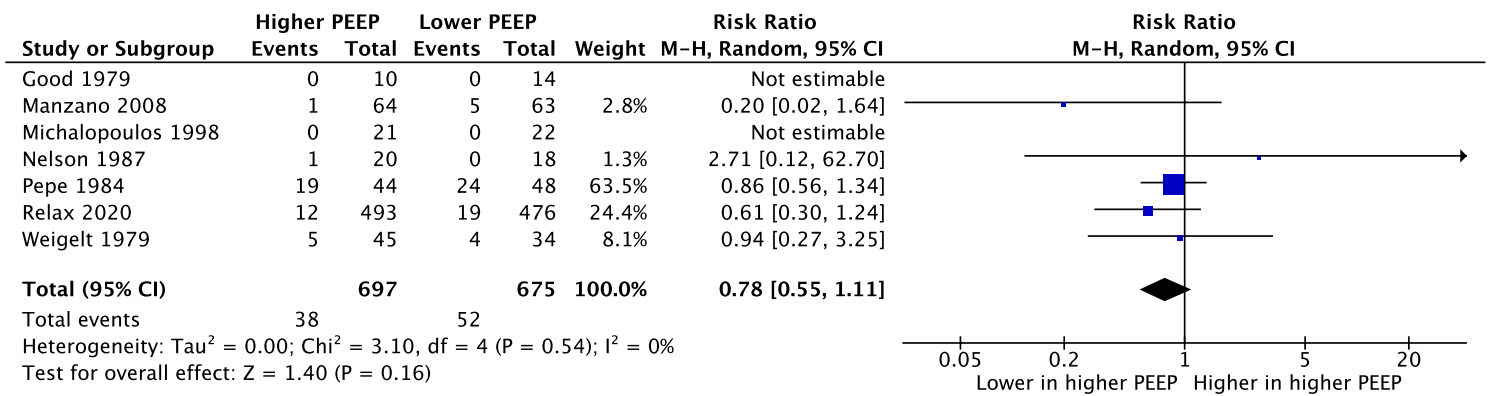

## Ventilator-associated pneumonia

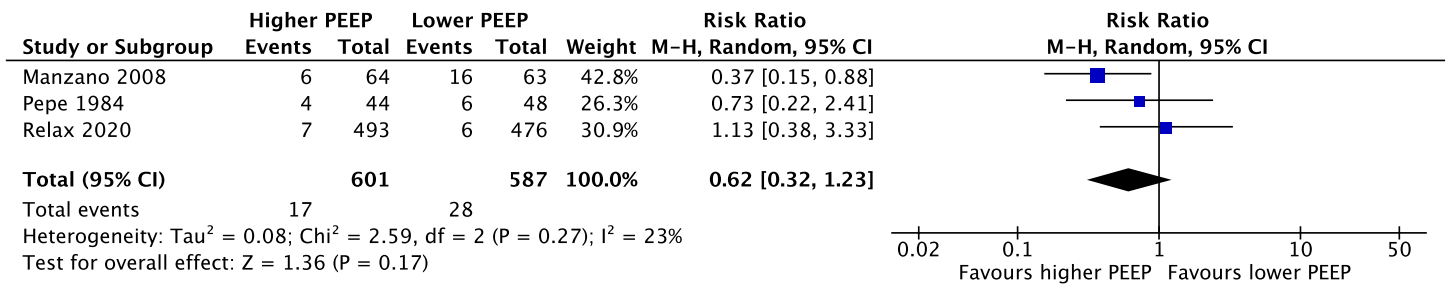

## Hypotension

| Study or Subgroup                                                                       | Higher PEEP |            | Lower PEEP |            | Weight        | Risk Ratio               |
|-----------------------------------------------------------------------------------------|-------------|------------|------------|------------|---------------|--------------------------|
|                                                                                         | Events      | Total      | Events     | Total      |               | M-H, Random, 95% CI      |
| Feeley 1975                                                                             | 0           | 12         | 0          | 13         |               | Not estimable            |
| Good 1979                                                                               | 0           | 10         | 0          | 14         |               | Not estimable            |
| Lesur 2010                                                                              | 16          | 30         | 16         | 33         | 95.5%         | 1.10 [0.68, 1.79]        |
| Pepe 1984                                                                               | 1           | 44         | 0          | 48         | 2.2%          | 3.27 [0.14, 78.15]       |
| Weigelt 1979                                                                            | 1           | 45         | 0          | 34         | 2.2%          | 2.28 [0.10, 54.36]       |
| <b>Total (95% CI)</b>                                                                   |             | <b>141</b> |            | <b>142</b> | <b>100.0%</b> | <b>1.15 [0.71, 1.84]</b> |
| Total events                                                                            | 18          |            | 16         |            |               |                          |
| Heterogeneity: $\tau^2 = 0.00$ ; $\chi^2 = 0.67$ , $df = 2$ ( $P = 0.72$ ); $I^2 = 0\%$ |             |            |            |            |               |                          |
| Test for overall effect: $Z = 0.56$ ( $P = 0.57$ )                                      |             |            |            |            |               |                          |

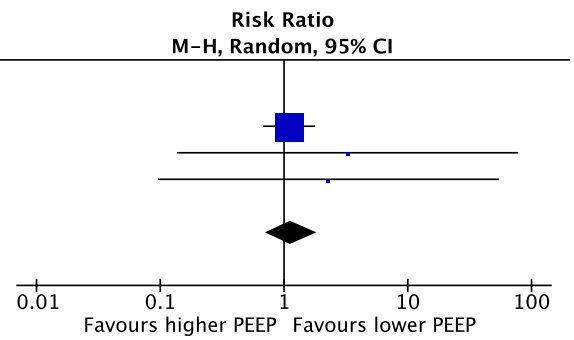



## Cardiac index

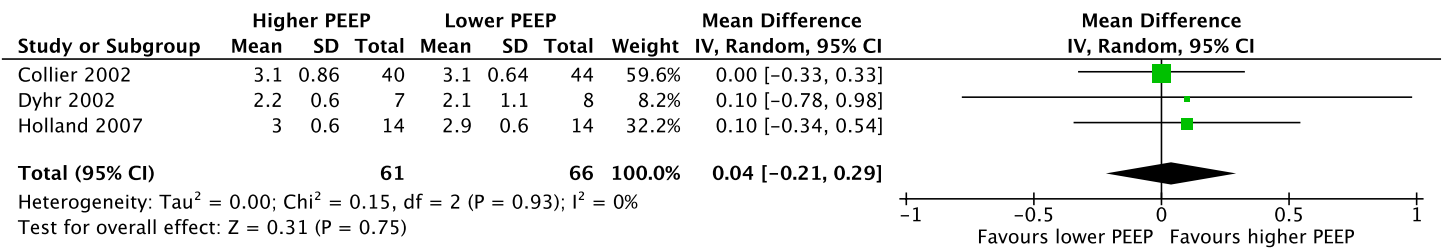

## Central venous pressure

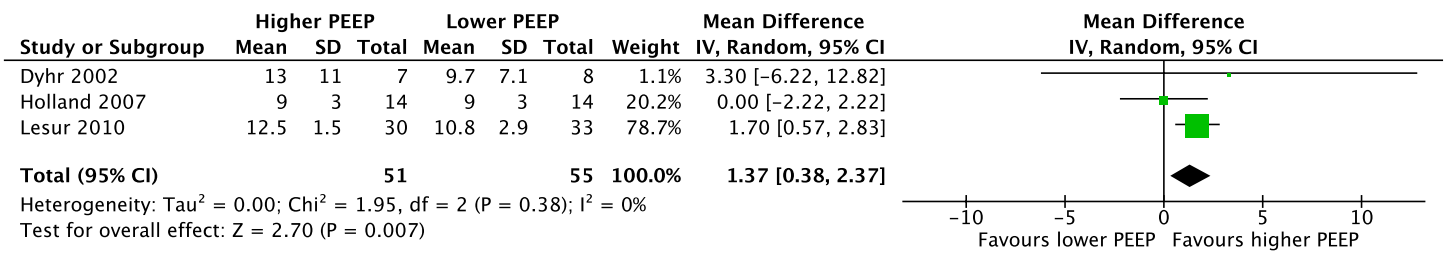

## Postoperative bleeding

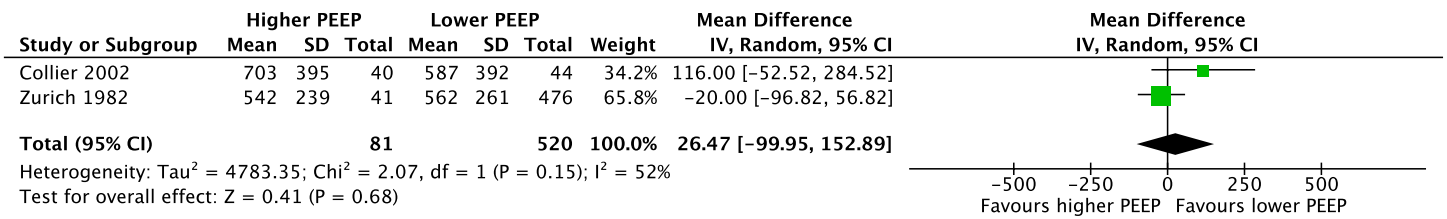

## PRBC transfusion

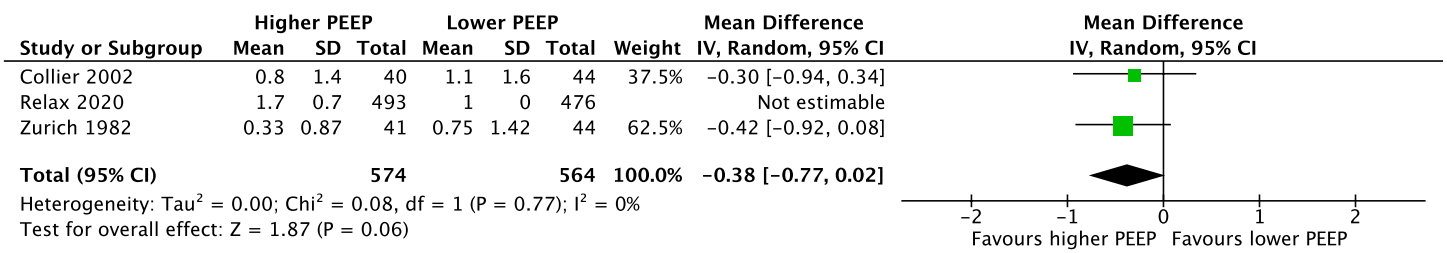

## Duration of ventilation

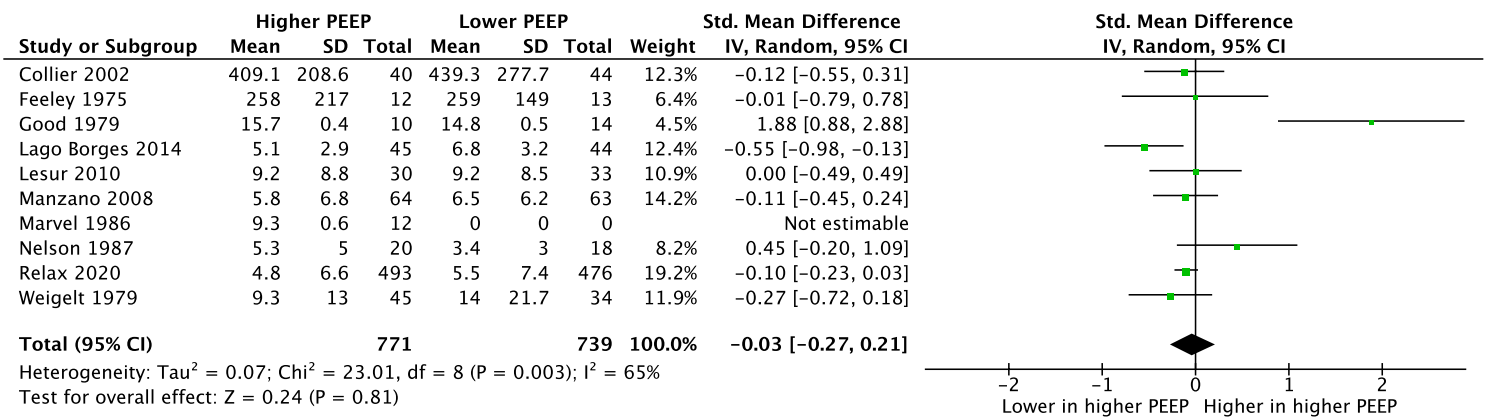

## ICU stay

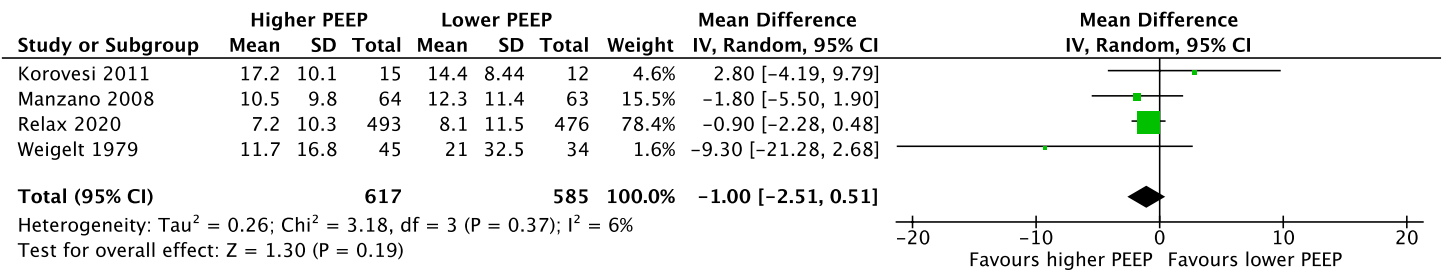

## Hospital stay

| Study or Subgroup     | Higher PEEP |      |            | Lower PEEP |      |            | Weight        | Mean Difference<br>IV, Random, 95% CI |
|-----------------------|-------------|------|------------|------------|------|------------|---------------|---------------------------------------|
|                       | Mean        | SD   | Total      | Mean       | SD   | Total      |               |                                       |
| Collier 2002          | 5.7         | 2.5  | 40         | 5.2        | 1.7  | 44         | 31.1%         | 0.50 [-0.42, 1.42]                    |
| Manzano 2008          | 19.5        | 18.2 | 64         | 26.3       | 22   | 63         | 0.9%          | -6.80 [-13.83, 0.23]                  |
| Marvel 1986           | 8.8         | 0.5  | 12         | 8.9        | 0.4  | 15         | 62.2%         | -0.10 [-0.45, 0.25]                   |
| Nelson 1987           | 28          | 24   | 20         | 26         | 24   | 18         | 0.2%          | 2.00 [-13.28, 17.28]                  |
| Relax 2020            | 19          | 21.4 | 493        | 19.9       | 22.1 | 476        | 5.6%          | -0.90 [-3.64, 1.84]                   |
| <b>Total (95% CI)</b> |             |      | <b>629</b> |            |      | <b>616</b> | <b>100.0%</b> | <b>-0.02 [-0.69, 0.66]</b>            |

Heterogeneity:  $\text{Tau}^2 = 0.16$ ;  $\text{Chi}^2 = 5.42$ ,  $\text{df} = 4$  ( $P = 0.25$ );  $I^2 = 26\%$   
 Test for overall effect:  $Z = 0.04$  ( $P = 0.96$ )

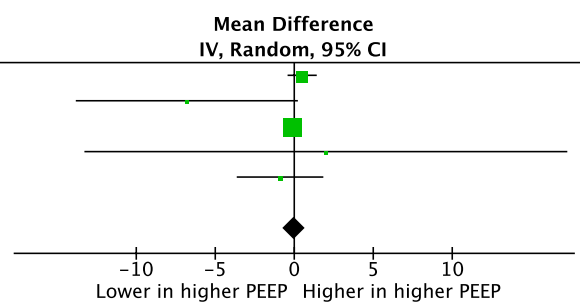

## ICU mortality

| Study or Subgroup                                                                       | Higher PEEP |            | Lower PEEP |            | Weight        | Risk Ratio<br>M-H, Random, 95% CI |
|-----------------------------------------------------------------------------------------|-------------|------------|------------|------------|---------------|-----------------------------------|
|                                                                                         | Events      | Total      | Events     | Total      |               |                                   |
| Dyhr 2002                                                                               | 0           | 7          | 0          | 8          |               | Not estimable                     |
| Feeley 1975                                                                             | 2           | 12         | 1          | 13         | 0.5%          | 2.17 [0.22, 20.94]                |
| Korovesi 2011                                                                           | 3           | 15         | 4          | 12         | 1.6%          | 0.60 [0.17, 2.18]                 |
| Nelson 1987                                                                             | 4           | 20         | 4          | 18         | 1.8%          | 0.90 [0.26, 3.08]                 |
| Relax 2020                                                                              | 185         | 492        | 163        | 476        | 96.0%         | 1.10 [0.93, 1.30]                 |
| <b>Total (95% CI)</b>                                                                   |             | <b>546</b> |            | <b>527</b> | <b>100.0%</b> | <b>1.09 [0.92, 1.28]</b>          |
| Total events                                                                            | 194         |            | 172        |            |               |                                   |
| Heterogeneity: $\tau^2 = 0.00$ ; $\chi^2 = 1.27$ , $df = 3$ ( $P = 0.74$ ); $I^2 = 0\%$ |             |            |            |            |               |                                   |
| Test for overall effect: $Z = 0.99$ ( $P = 0.32$ )                                      |             |            |            |            |               |                                   |

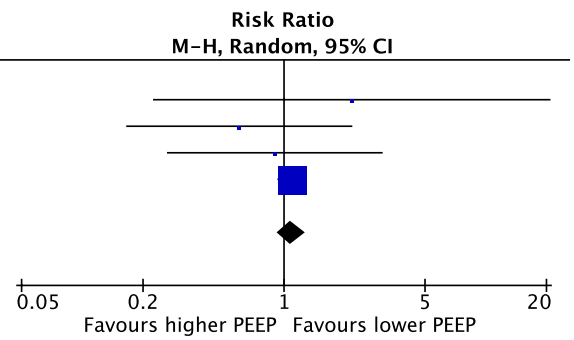



## 28-day mortality

| Study or Subgroup                                                                           | Higher PEEP |            | Lower PEEP |            | Weight        | Risk Ratio               |
|---------------------------------------------------------------------------------------------|-------------|------------|------------|------------|---------------|--------------------------|
|                                                                                             | Events      | Total      | Events     | Total      |               | M-H, Random, 95% CI      |
| Lesur 2010                                                                                  | 9           | 30         | 14         | 33         | 28.8%         | 0.71 [0.36, 1.39]        |
| Ma 2014                                                                                     | 15          | 60         | 39         | 60         | 33.1%         | 0.38 [0.24, 0.62]        |
| Relax 2020                                                                                  | 207         | 493        | 183        | 476        | 38.1%         | 1.09 [0.94, 1.27]        |
| <b>Total (95% CI)</b>                                                                       |             | <b>583</b> |            | <b>569</b> | <b>100.0%</b> | <b>0.68 [0.33, 1.40]</b> |
| Total events                                                                                | 231         |            | 236        |            |               |                          |
| Heterogeneity: $\tau^2 = 0.35$ ; $\chi^2 = 17.71$ , $df = 2$ ( $P = 0.0001$ ); $I^2 = 89\%$ |             |            |            |            |               |                          |
| Test for overall effect: $Z = 1.05$ ( $P = 0.30$ )                                          |             |            |            |            |               |                          |

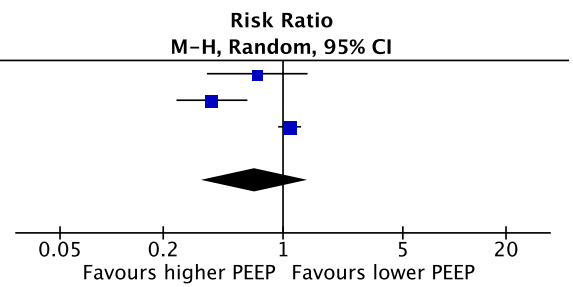

## Online Resource 7. Funnel Plots

Abbreviations: SE, standard error; RR, risk ratio; MD, mean difference; SMD, standardized mean difference; PaO<sub>2</sub>/FiO<sub>2</sub>, arterial partial pressure of oxygen to fraction of inspired oxygen ratio; A-aDO<sub>2</sub>, alveolar-arterial oxygen pressure difference; ARDS, acute respiratory distress syndrome; ICU, intensive care unit.

### Hospital mortality

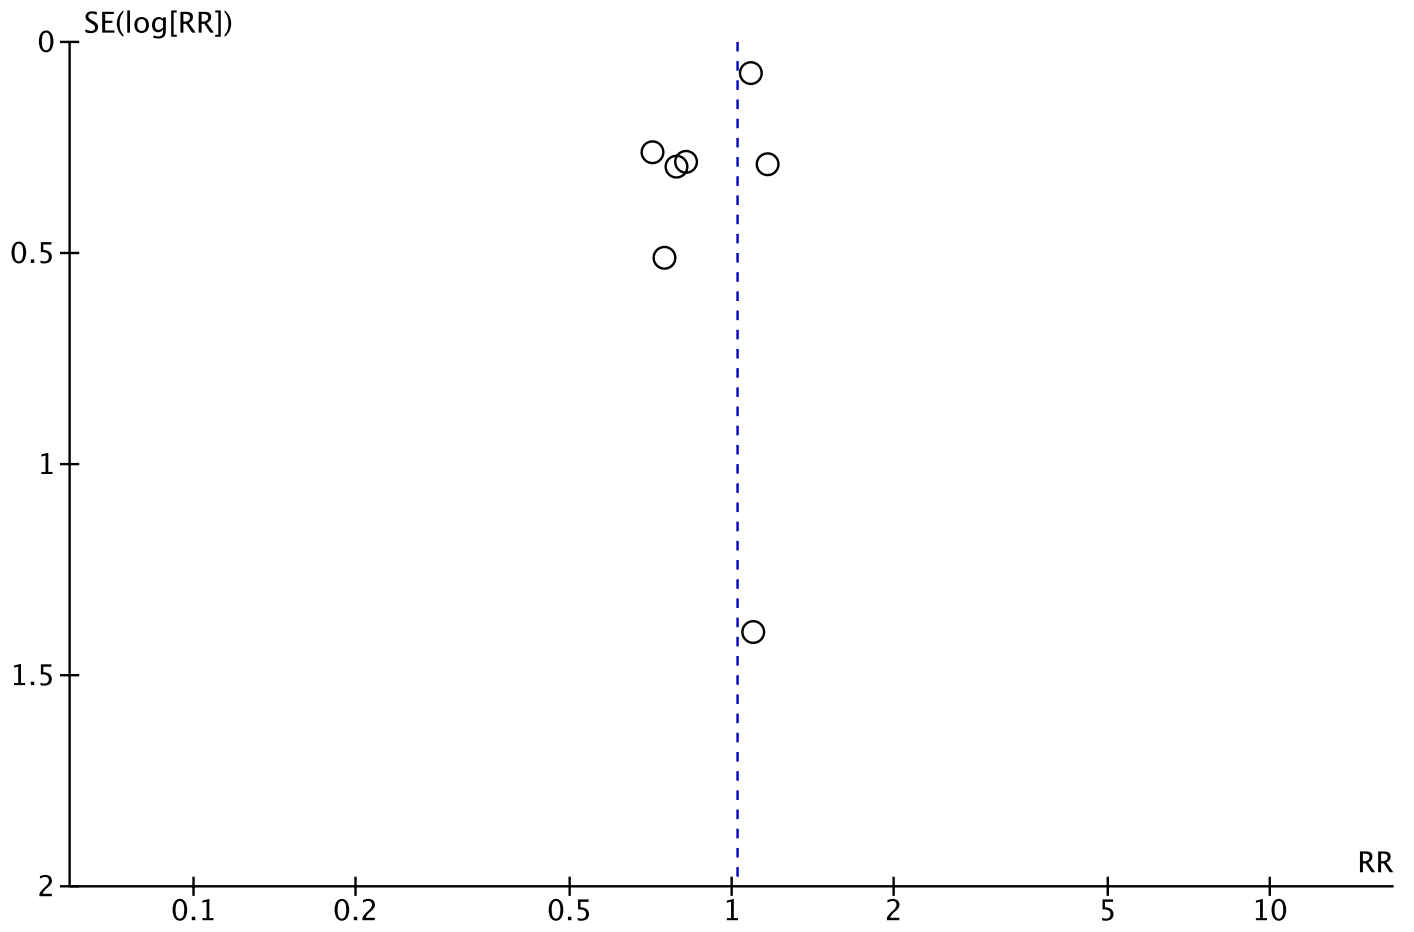

**PaO2/FiO2**

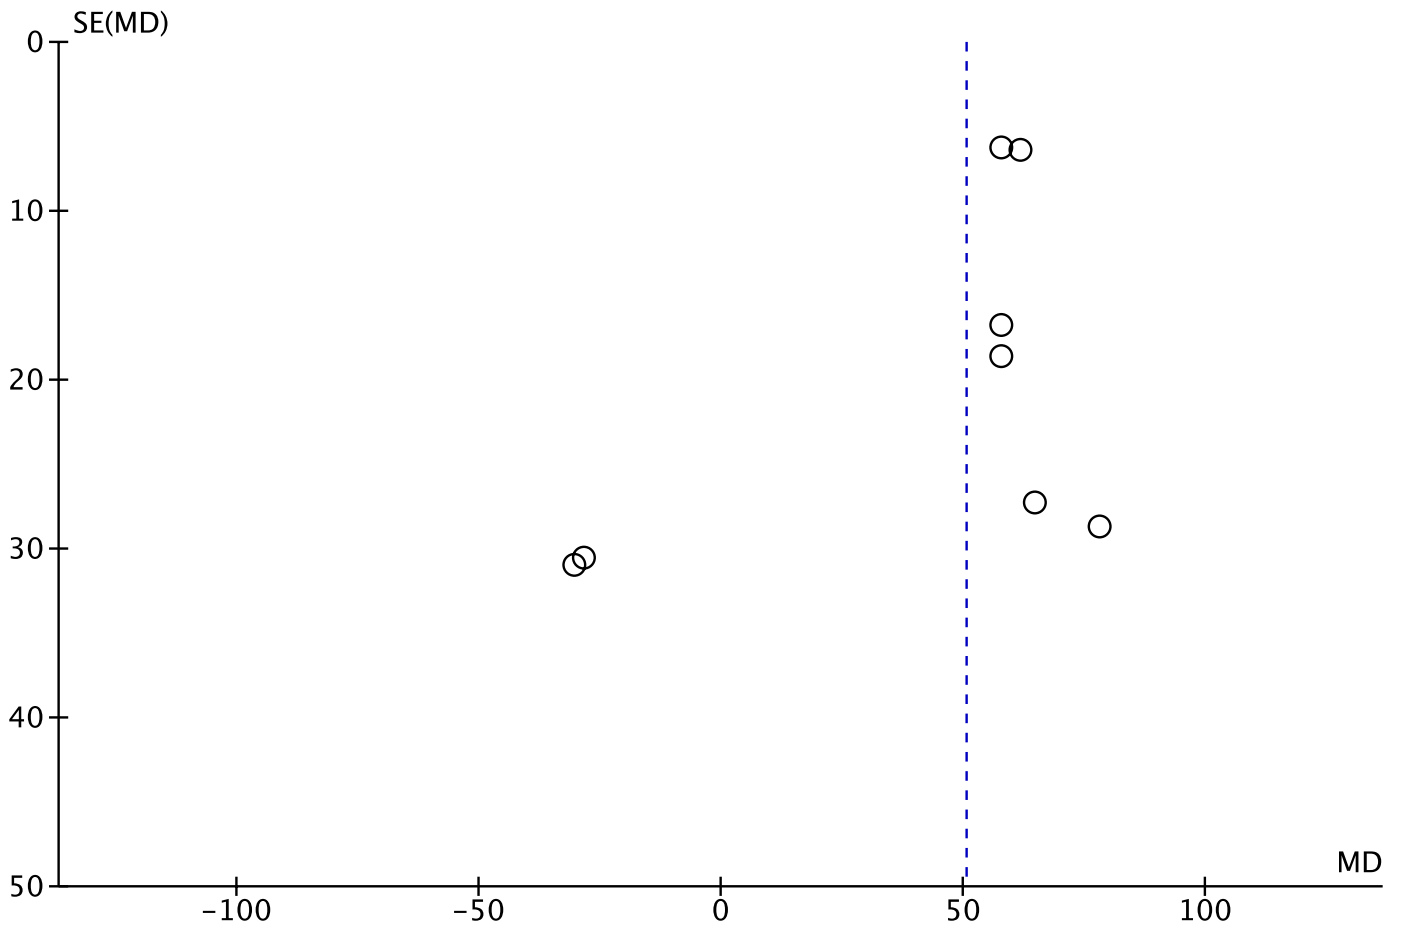

## A-aDO2

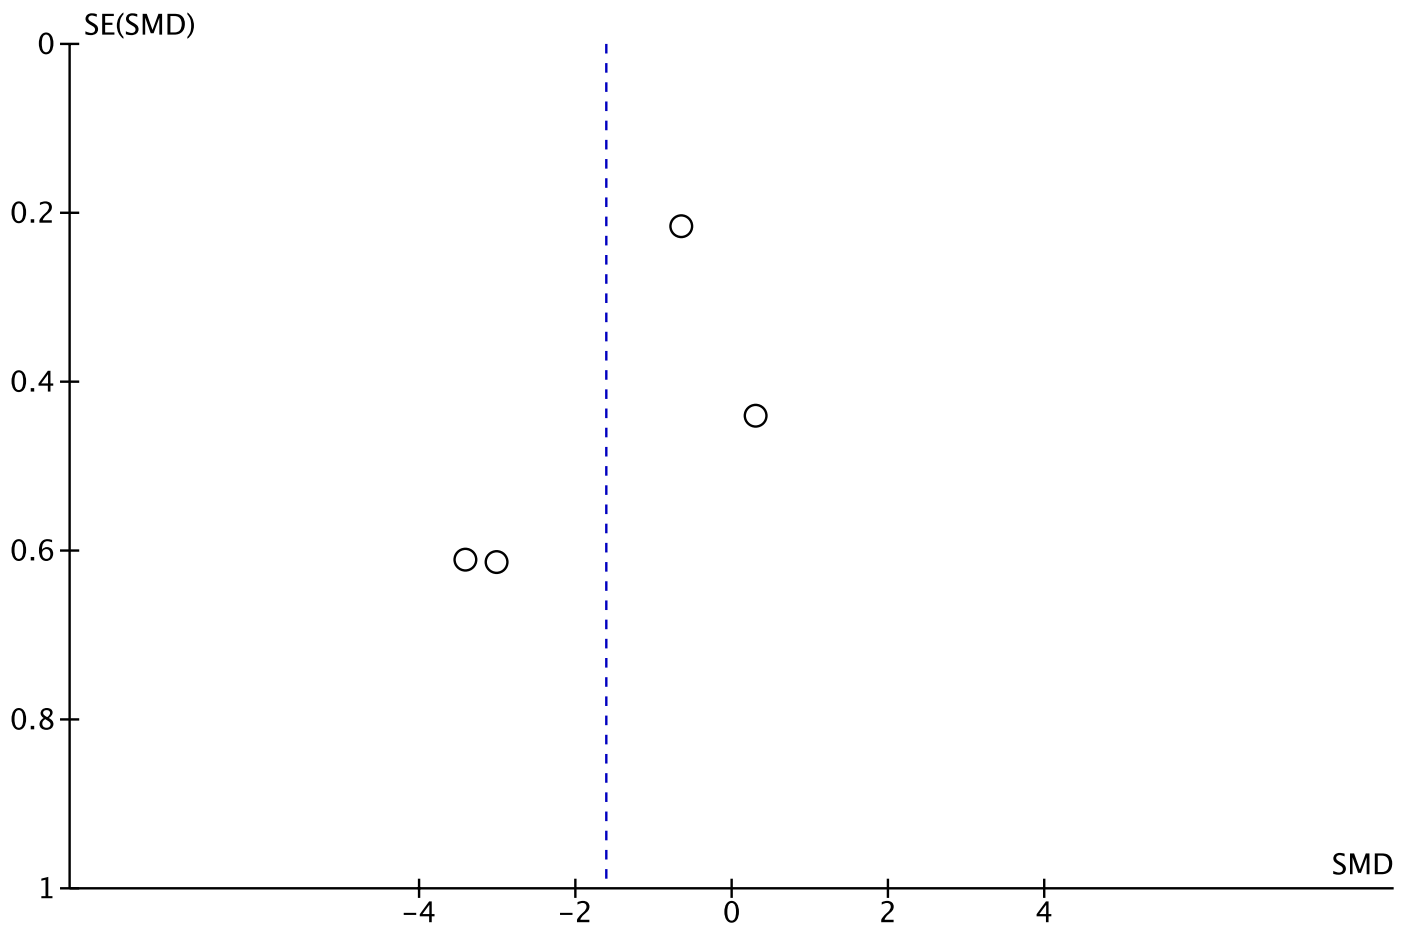

## Compliance

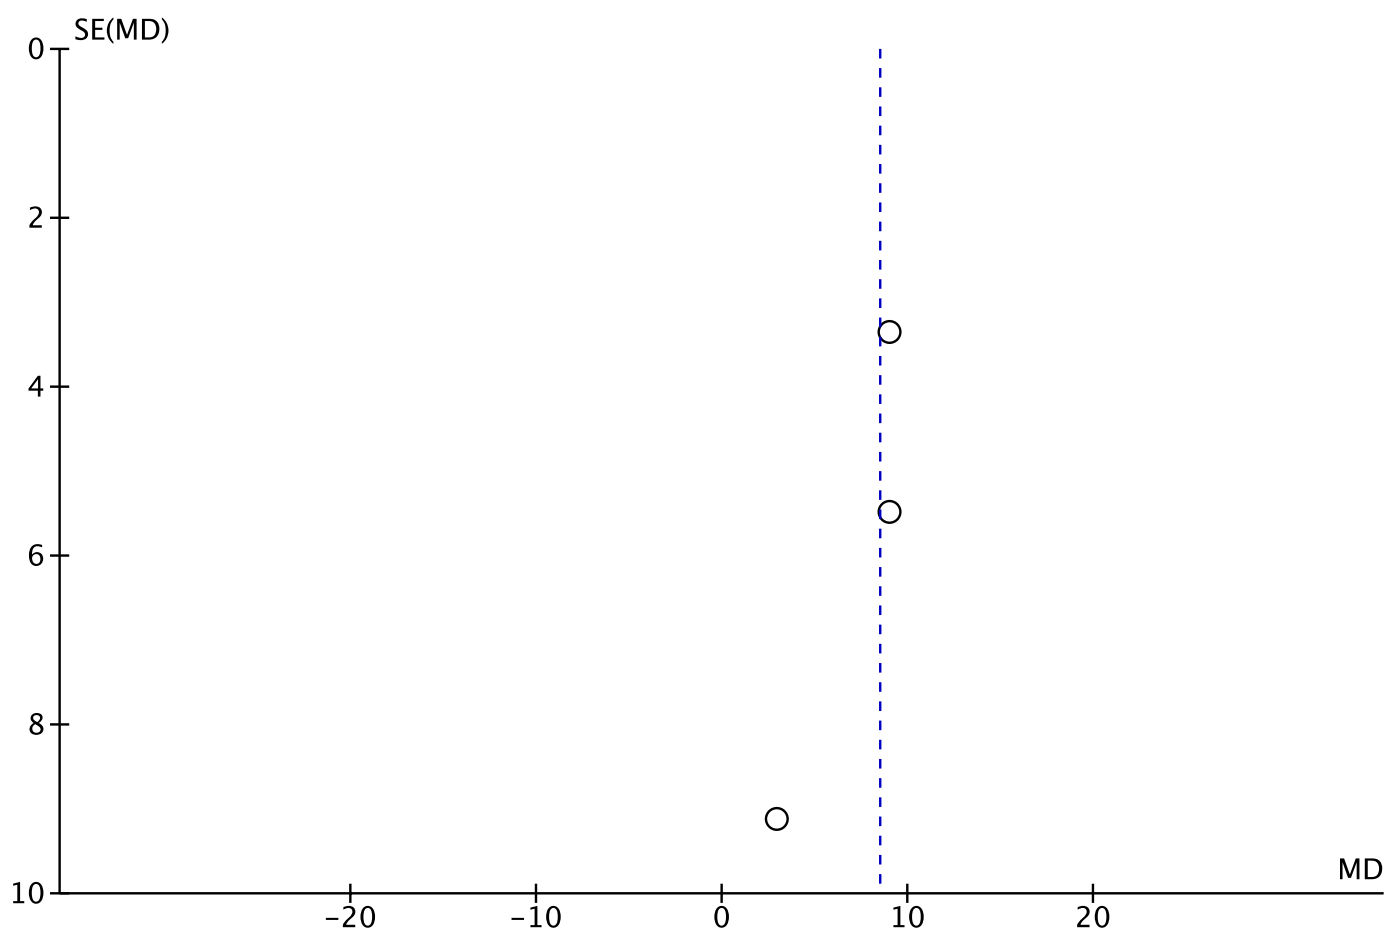

# Hypoxemia

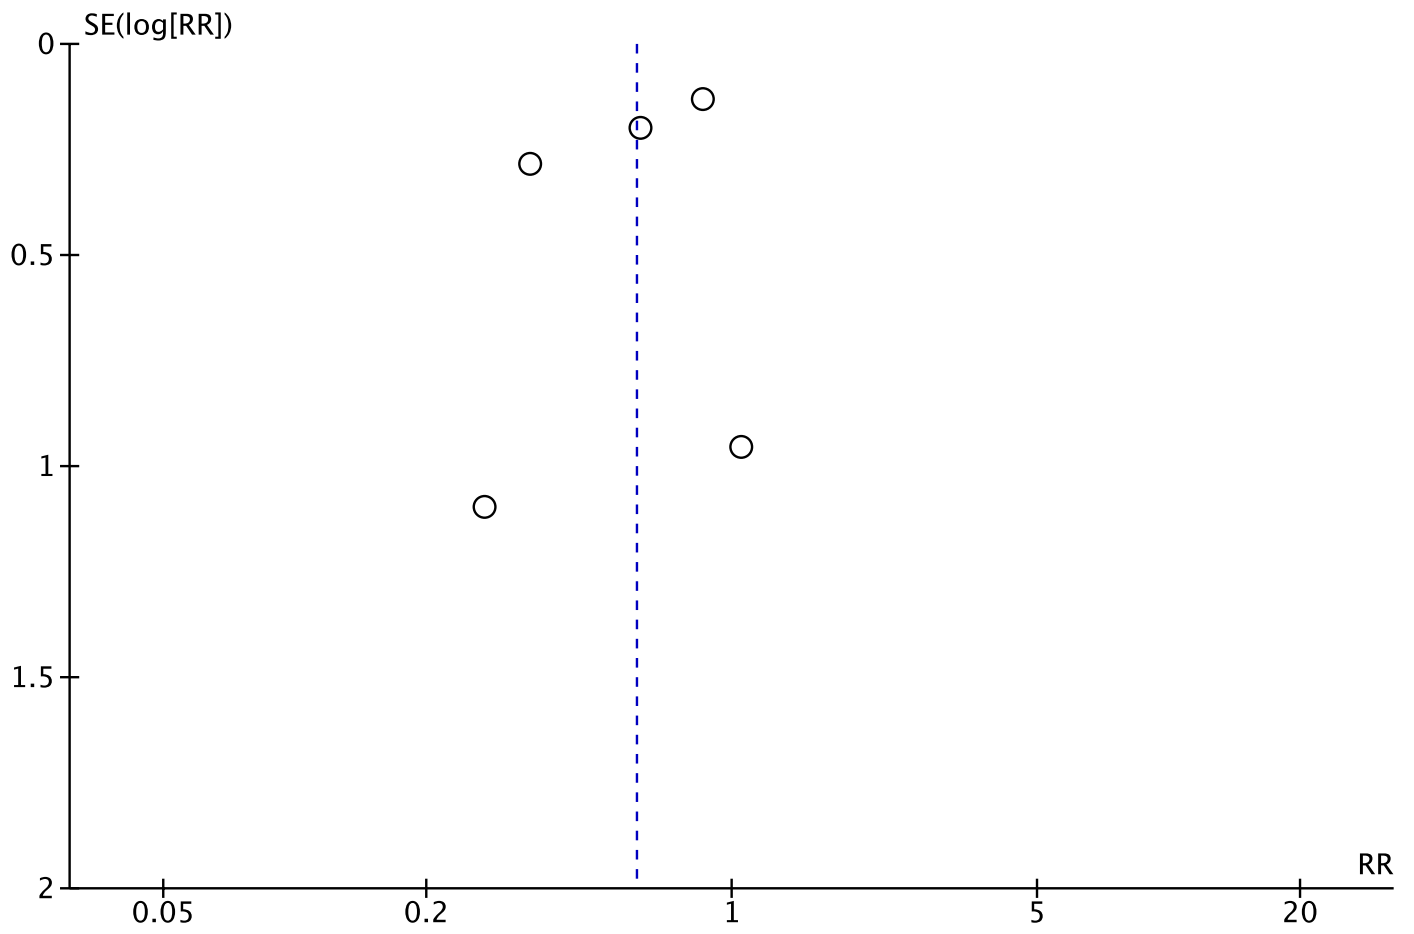

# Atelectasis

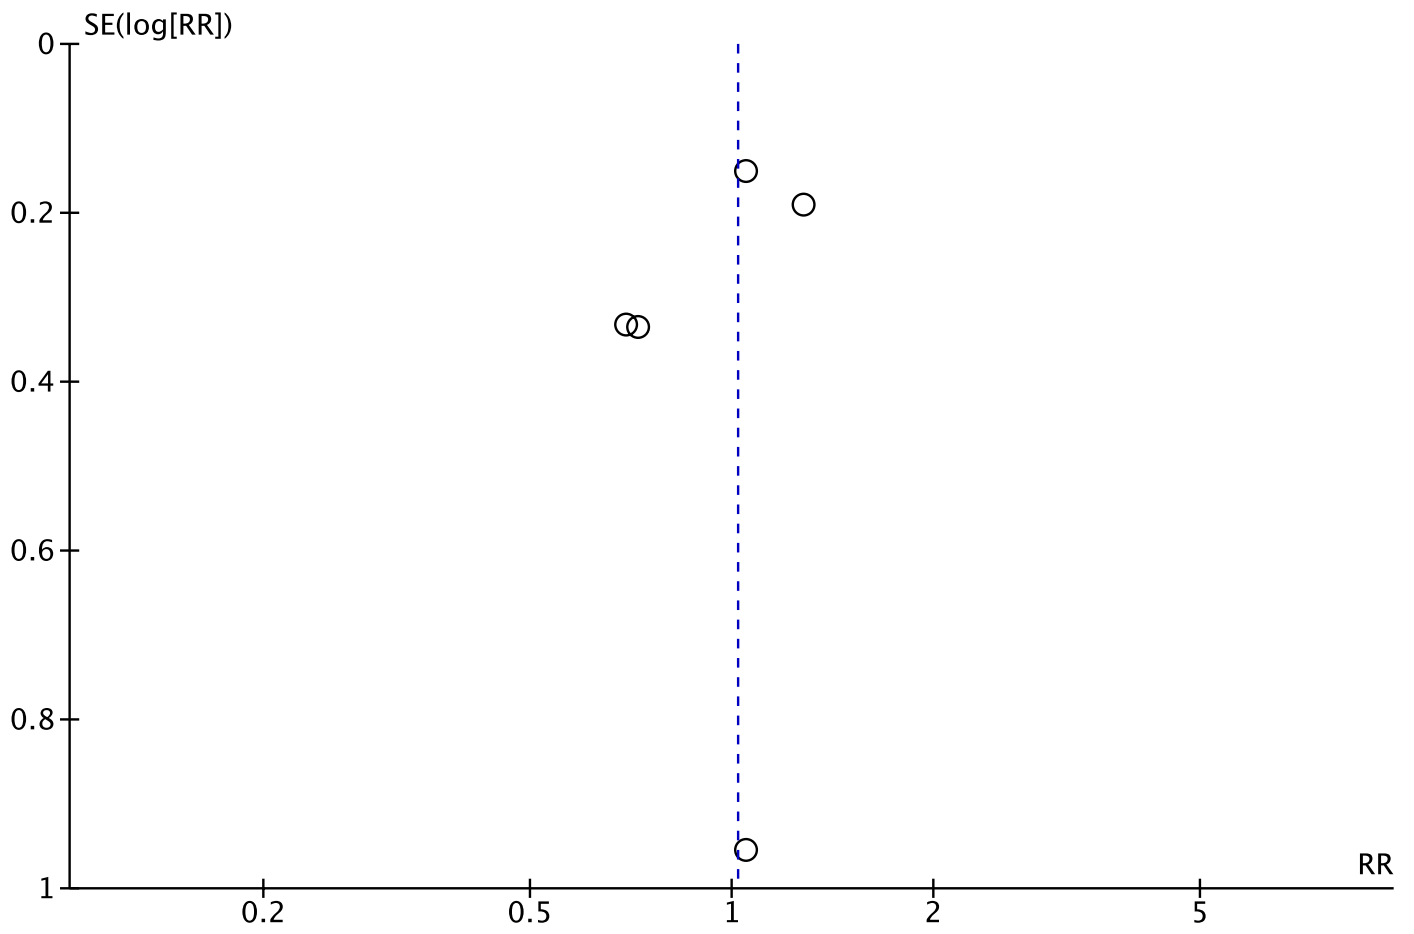



## Barotrauma

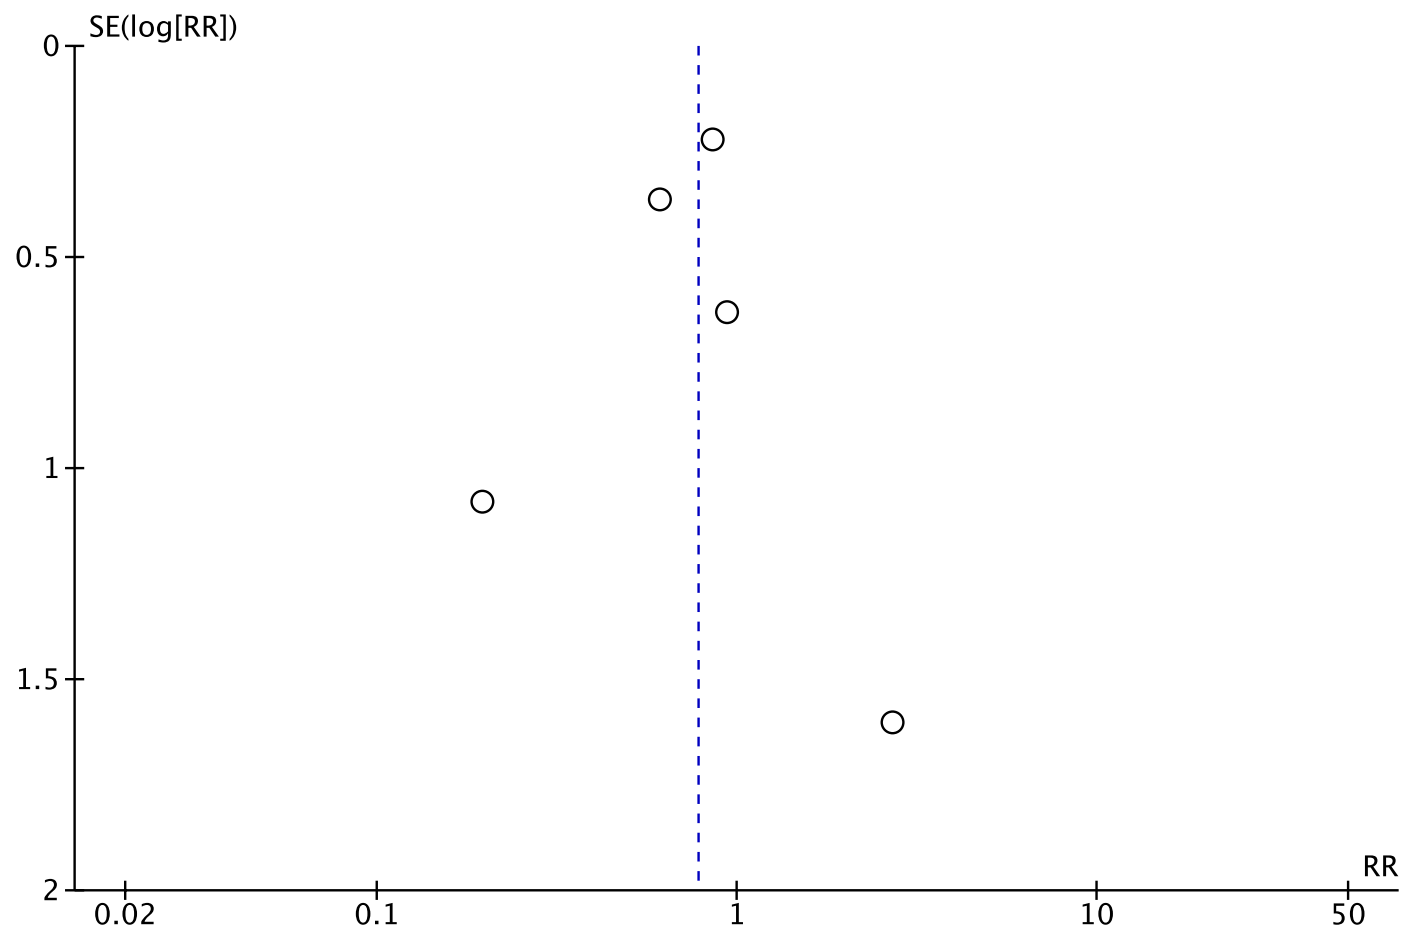

## Ventilator-associated pneumonia

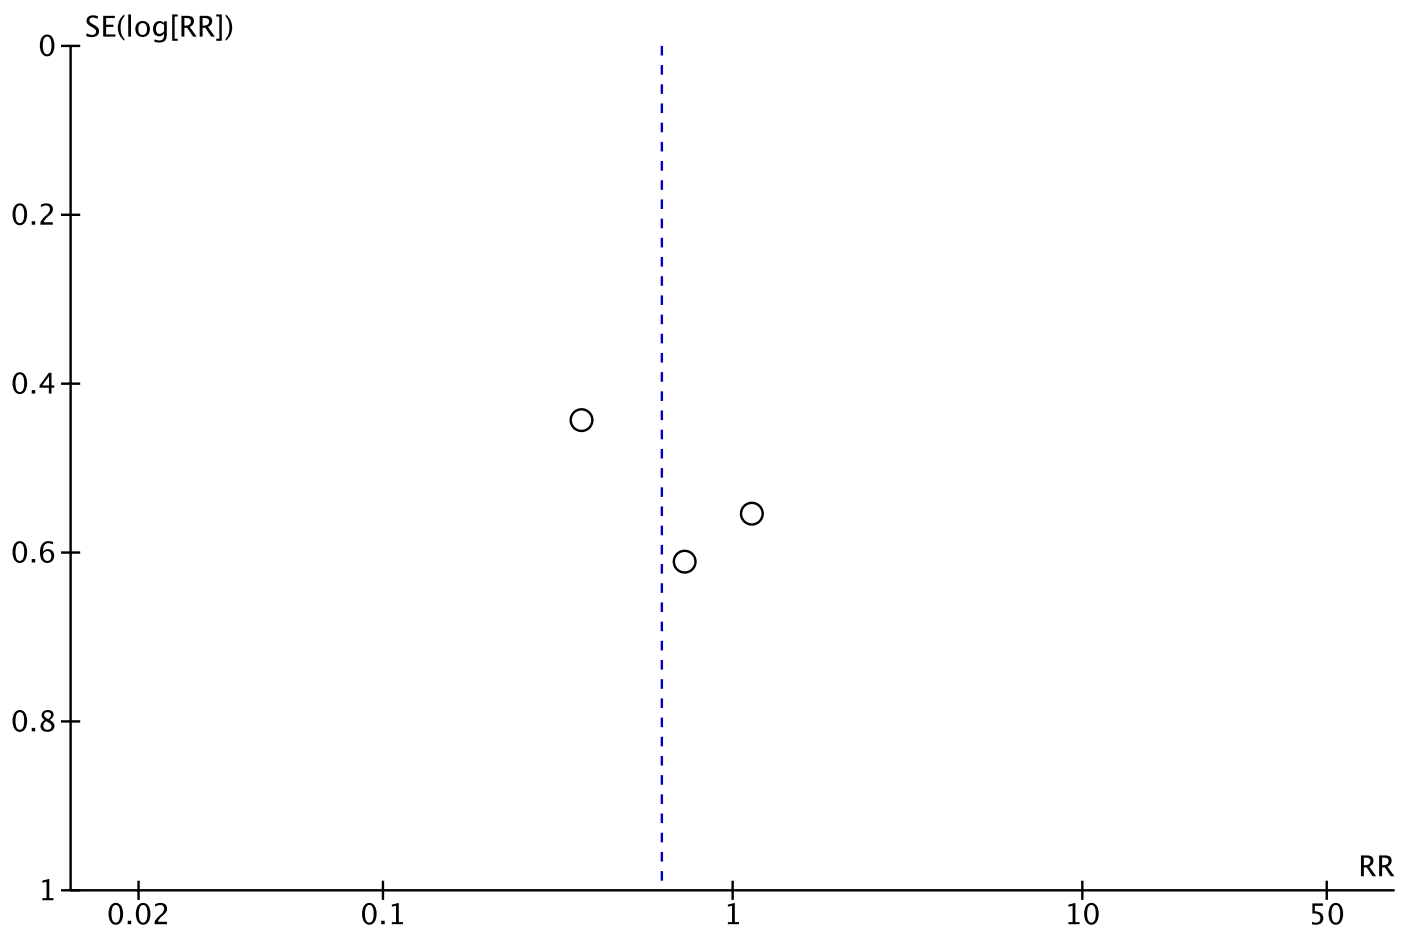

# ARDS

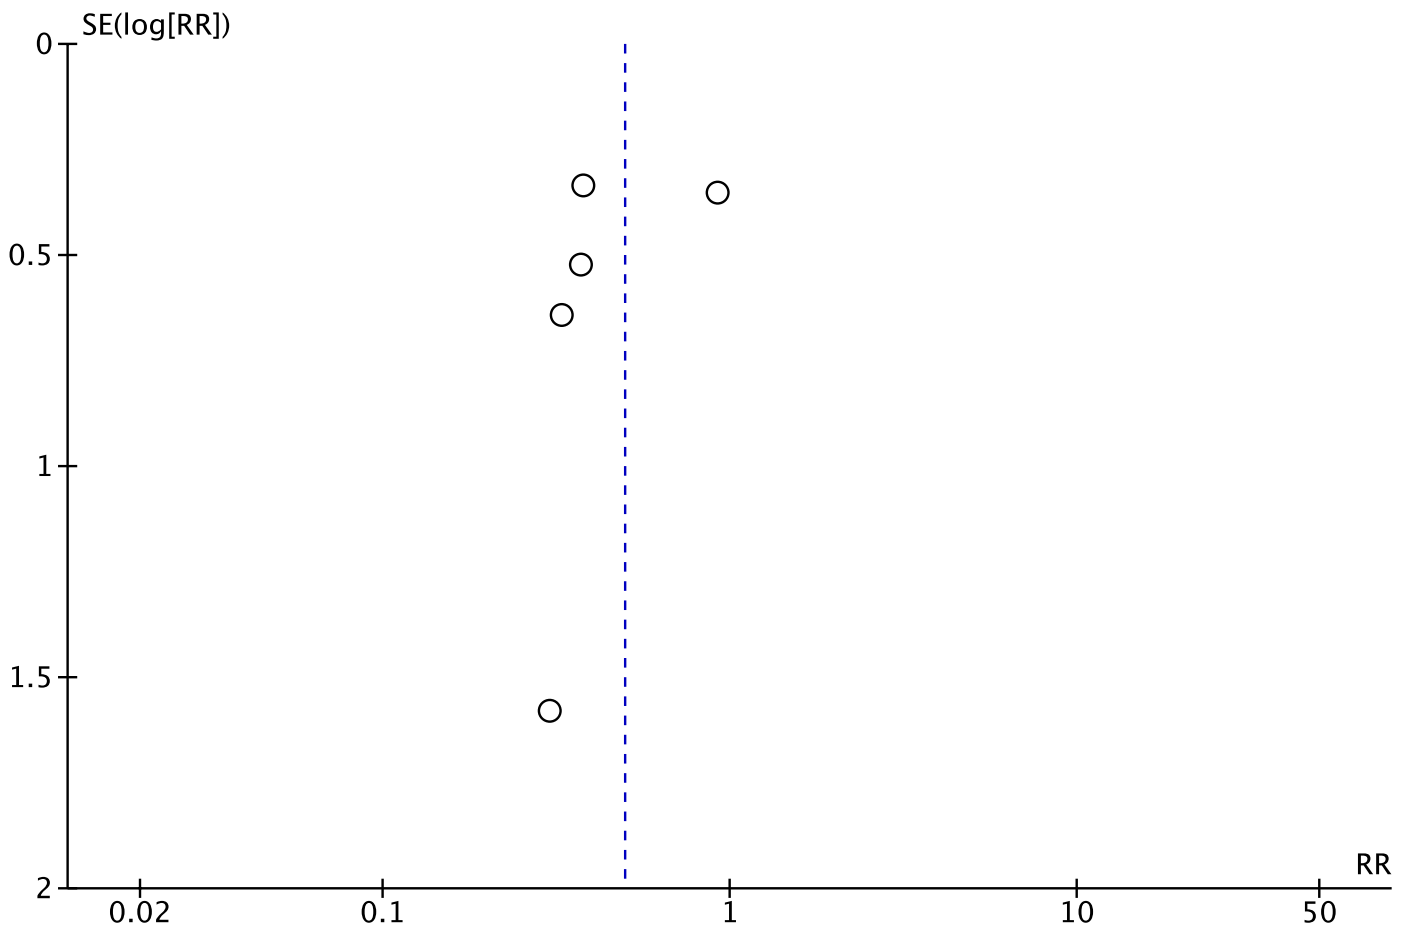

## Hypotension

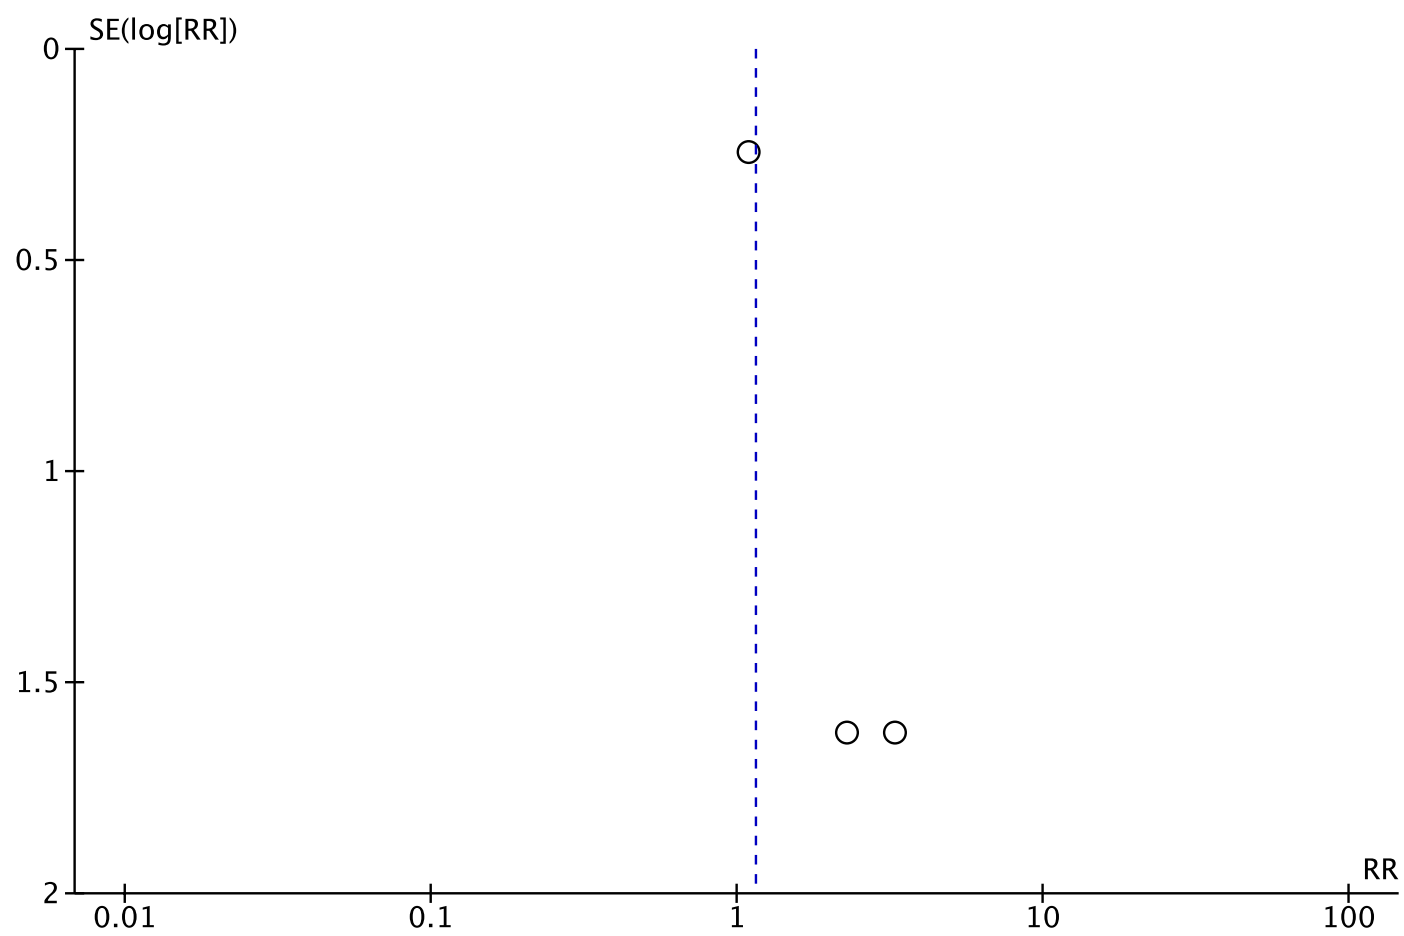

**Cardiac index**

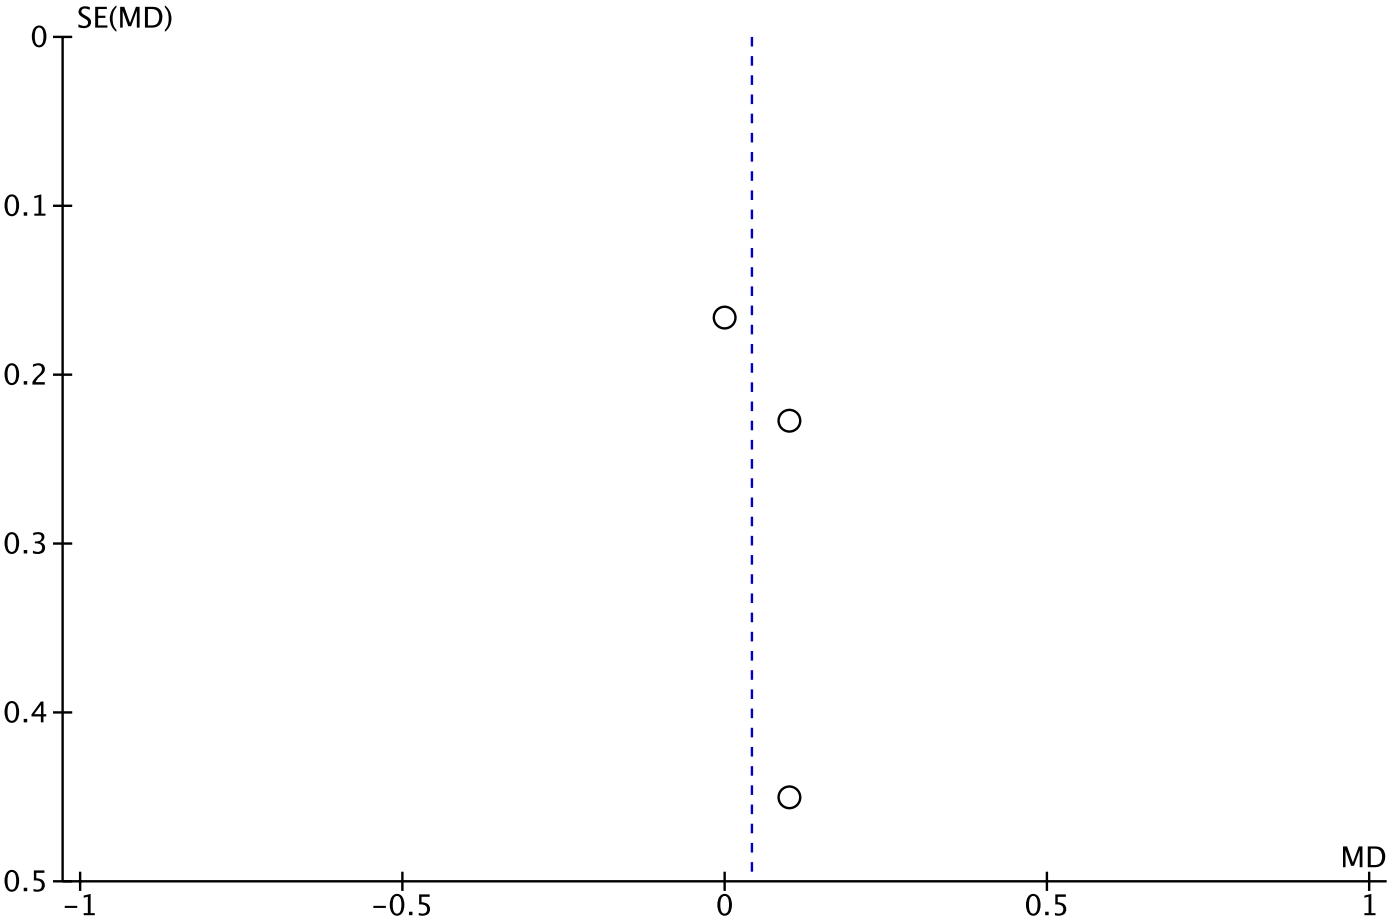

## Central venous pressure

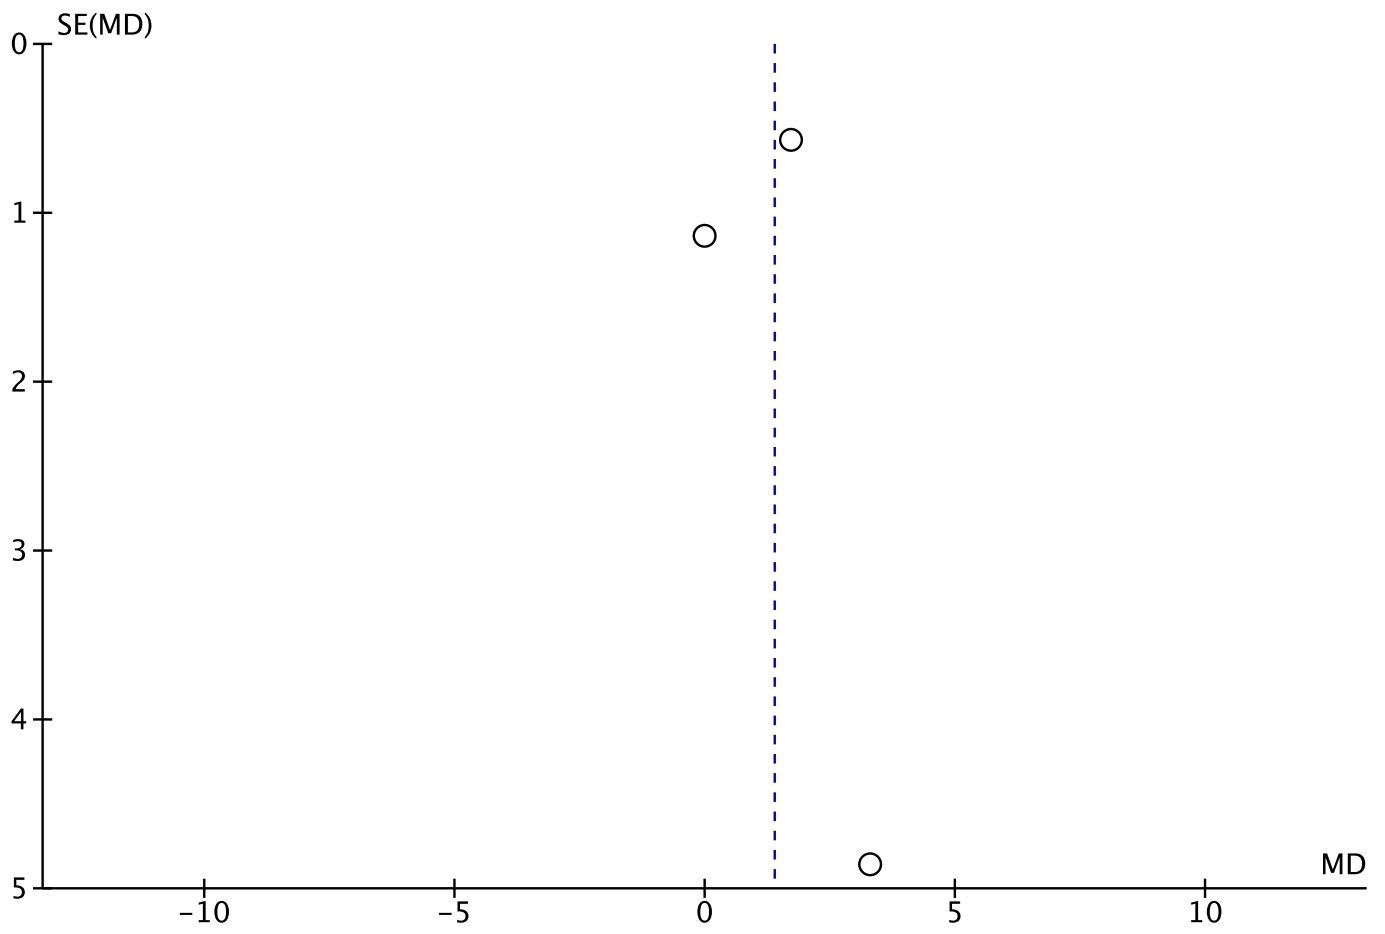

**Postoperative bleeding**

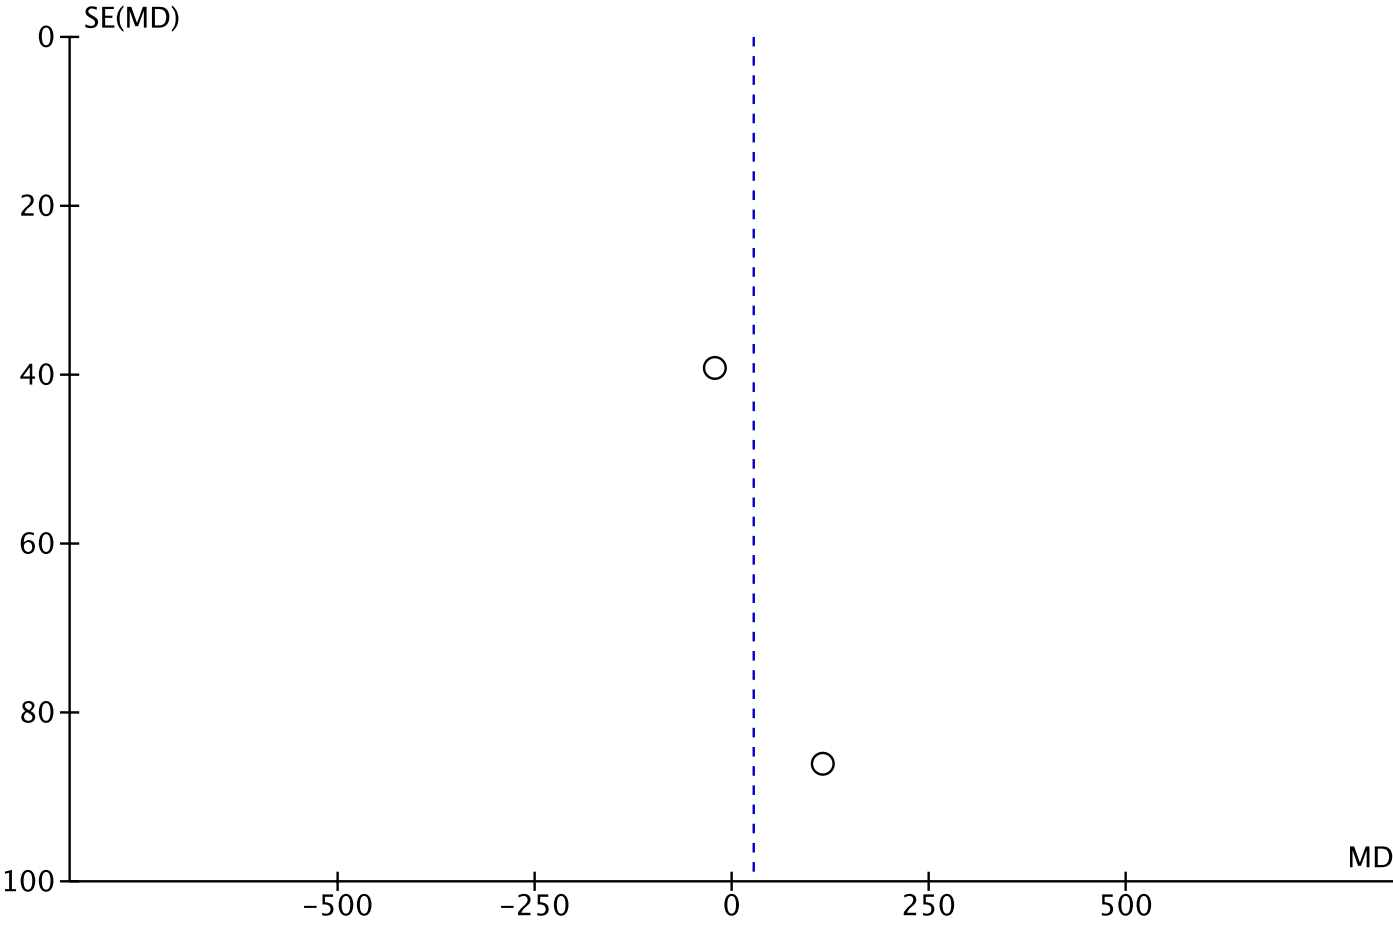

### Packed red blood cell transfusion

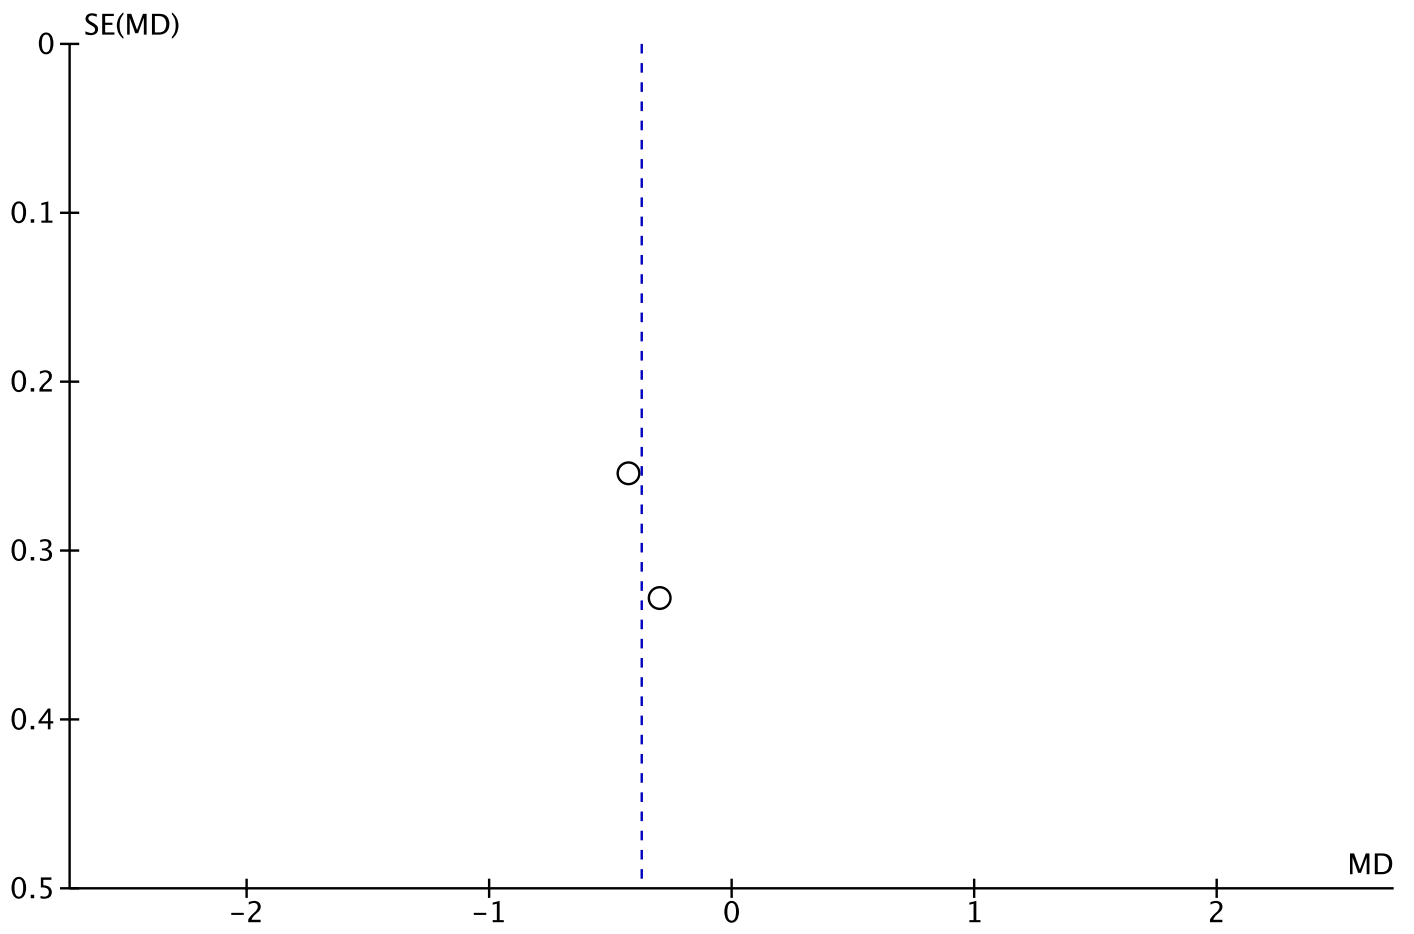



### Duration of ventilation

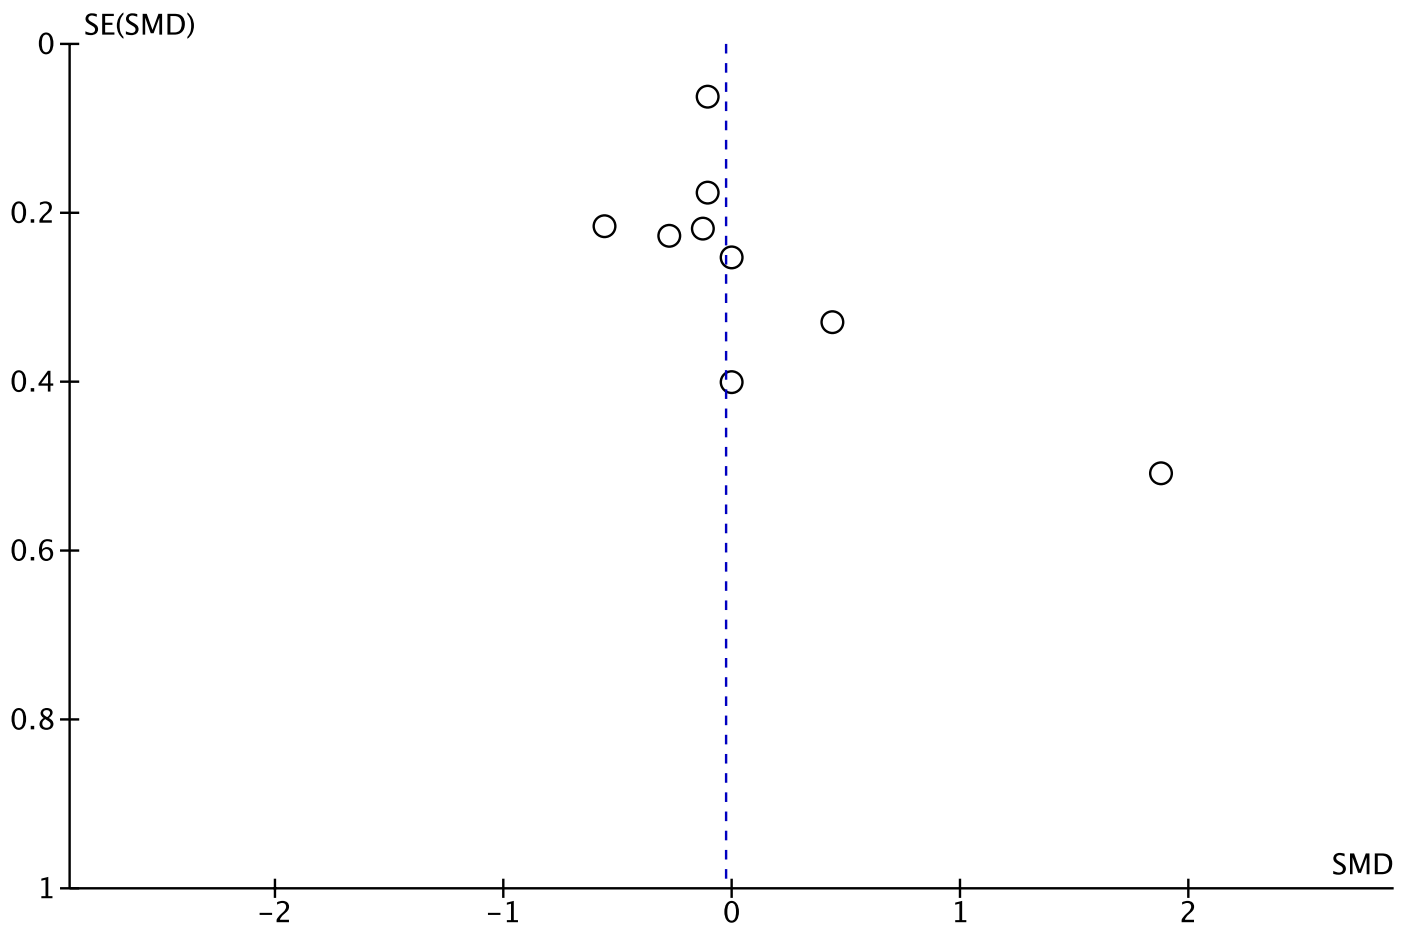

ICU stay

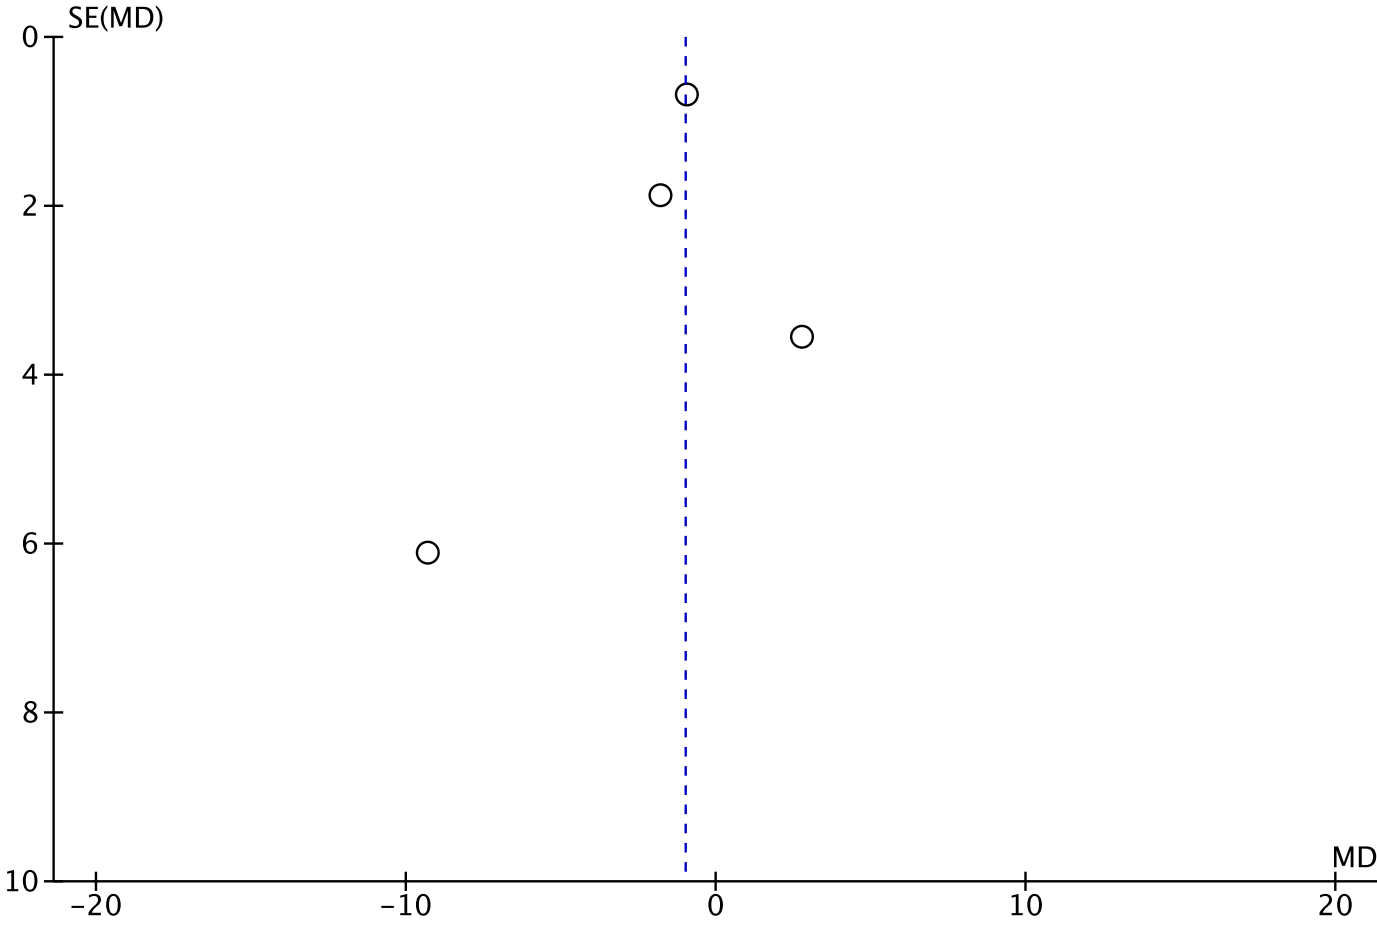

## Hospital stay

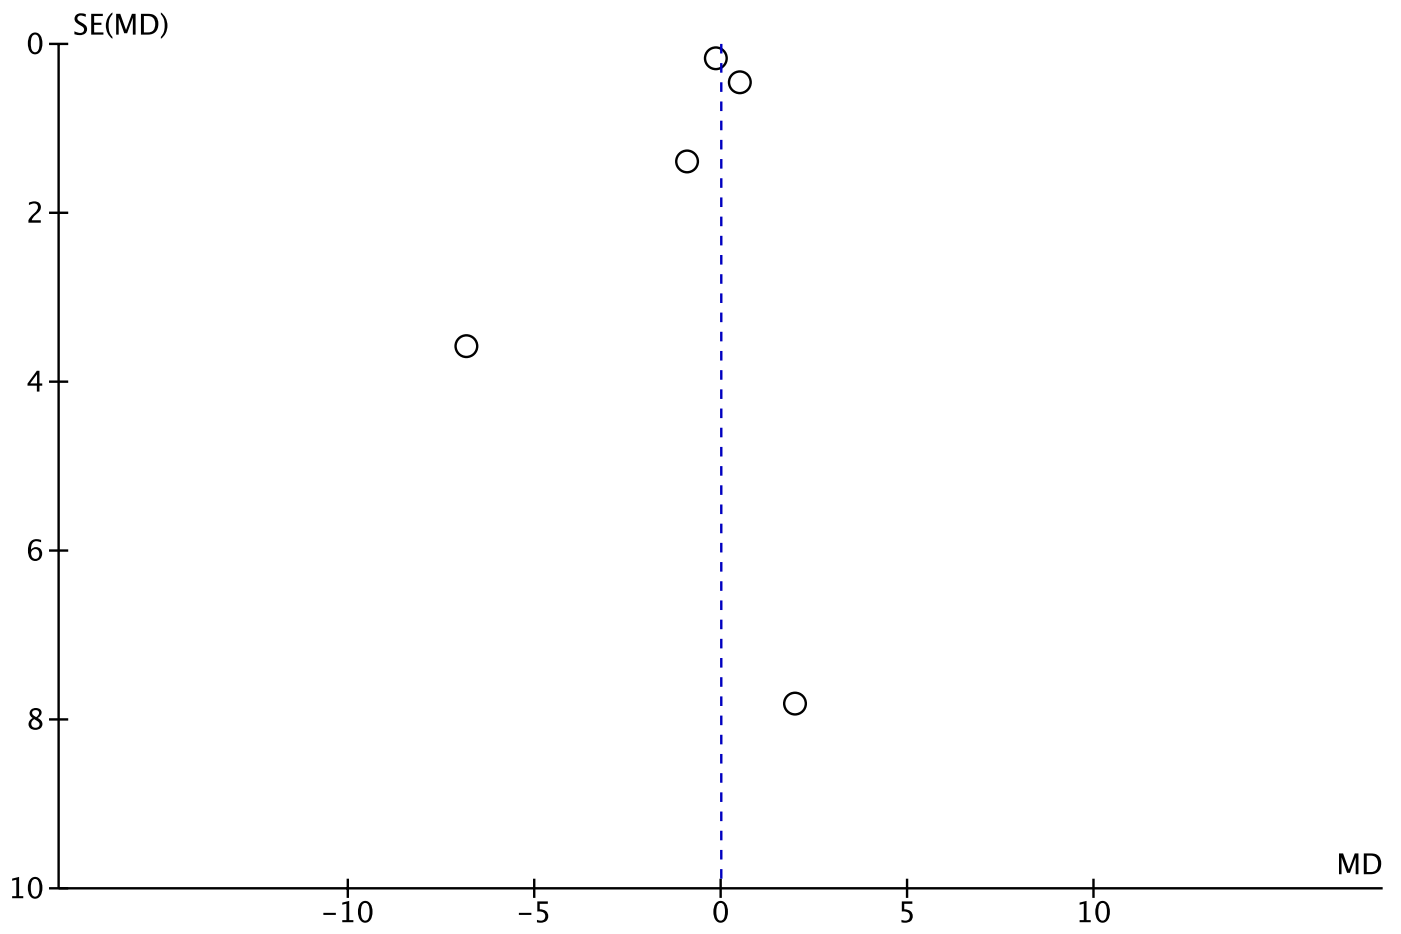

# ICU mortality

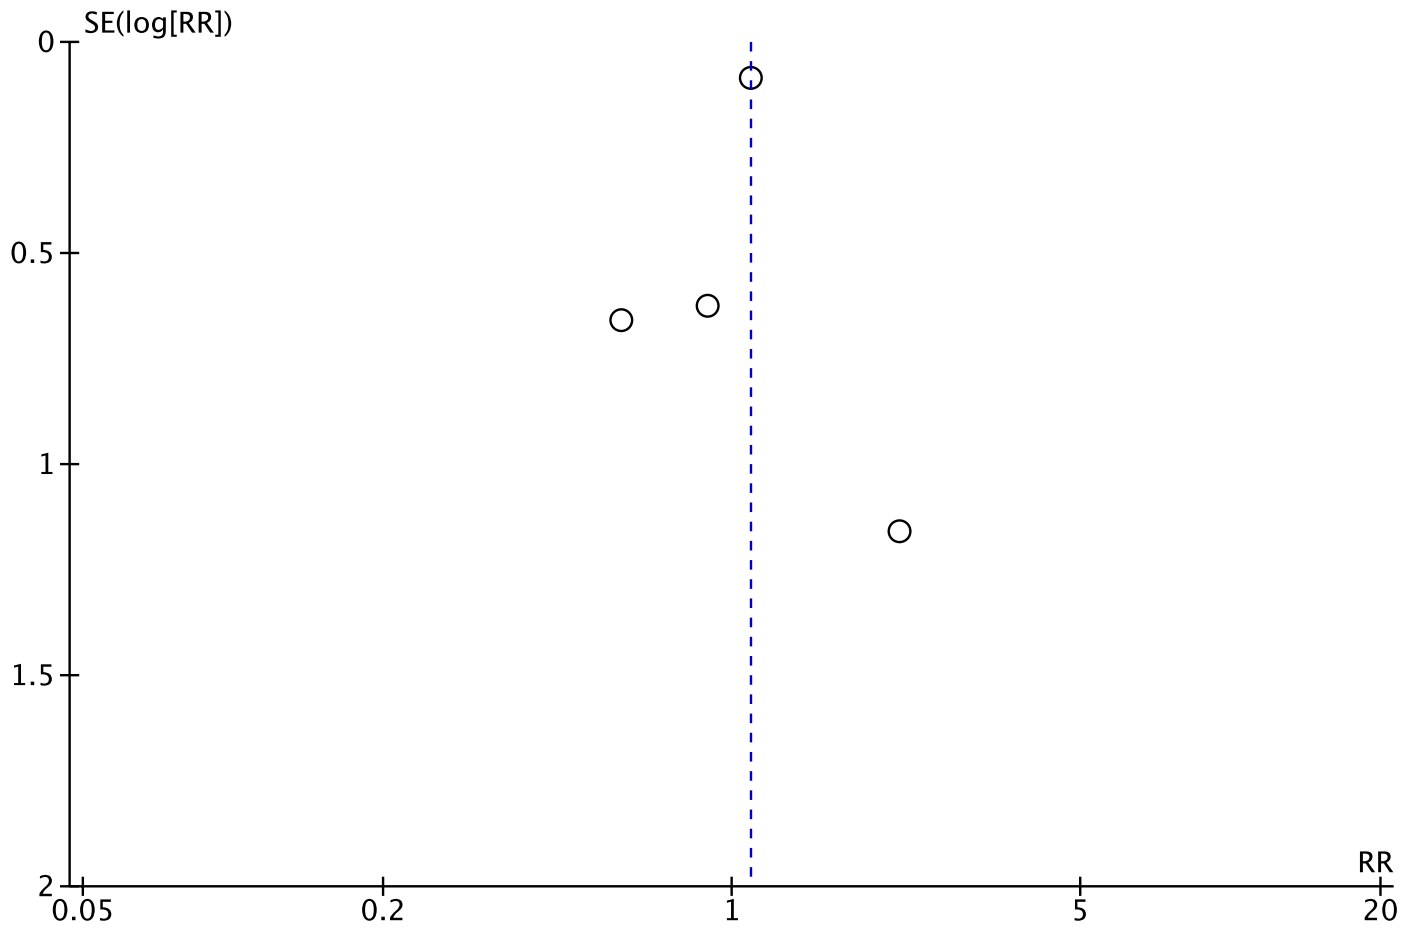

### 28-day mortality

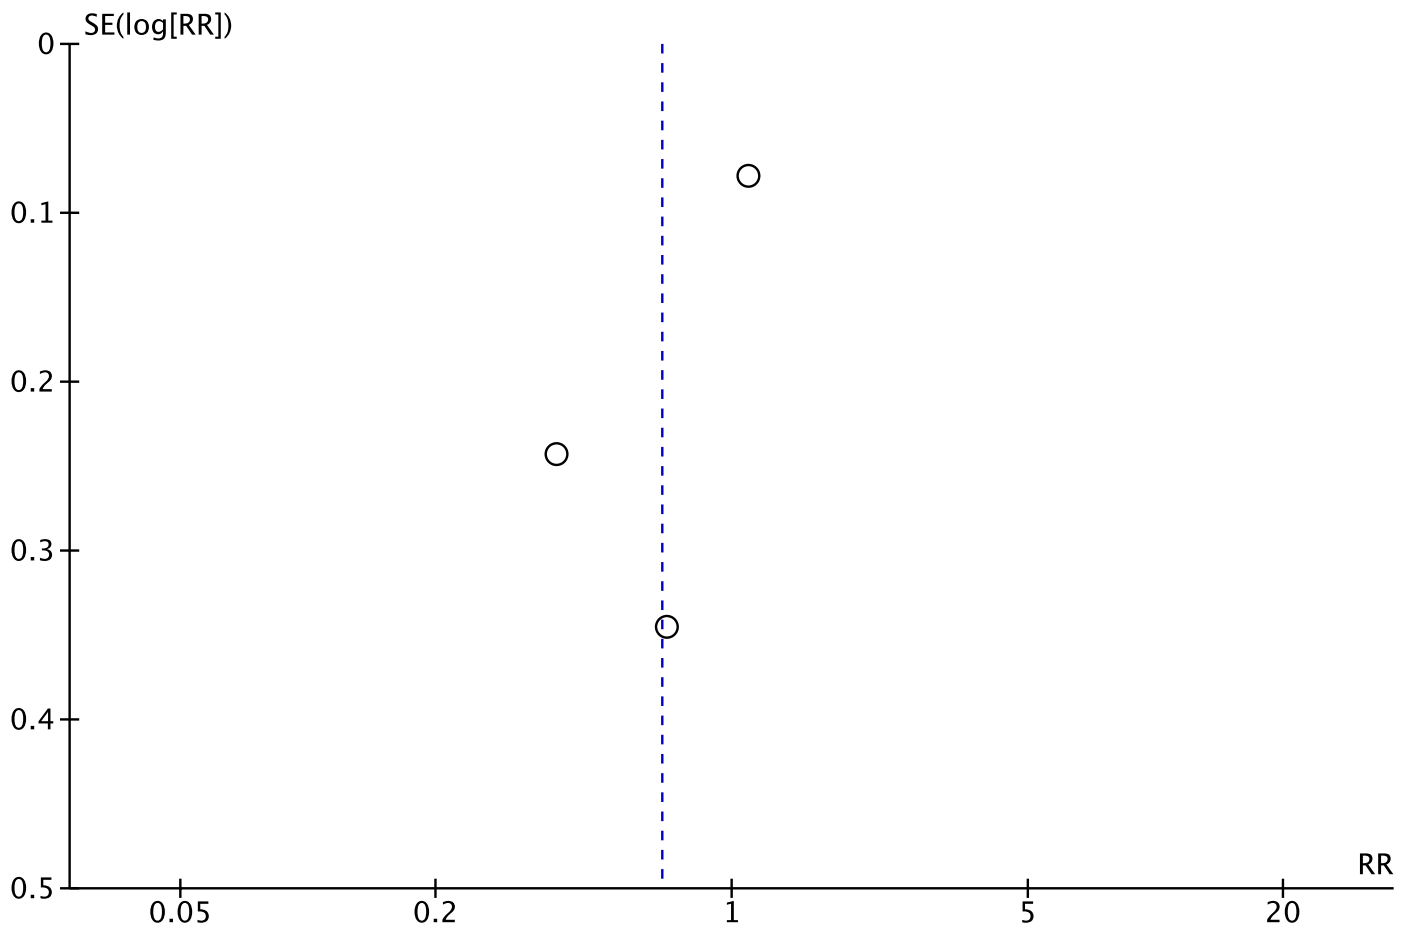

## Online Resource 8. Sensitivity Analyses

### Sensitivity analyses: timing of measurement

Sensitivity analyses according to the different timing of measurement of the variables in the following studies: Korovesi (day 1 and day 5), Manzano (basal, 6 hours, and day 1), and RELAx (after randomization, day 1, and day 2). Packed red blood cell transfusion became significantly lower in the higher PEEP group when considering this variable after randomization in the RELAx study.

Abbreviations: PRBC, packed red blood cell; afterrand, after randomization; IV, inverse variance; CI, confidence interval; d1, day 1; d2, day 2; 6 h, 6 hours; d5, day 5.

| Outcome or Subgroup                    | Studies | Participants | Statistical Method                   | Effect Estimate      |
|----------------------------------------|---------|--------------|--------------------------------------|----------------------|
| 1.1 PRBC transfusion (relax_afterrand) | 3       | 1138         | Mean Difference (IV, Random, 95% CI) | -0.39 [-0.64, -0.14] |
| 1.2 PRBC transfusion (relax_d1)        | 3       | 1138         | Mean Difference (IV, Random, 95% CI) | -0.11 [-0.58, 0.36]  |
| 1.3 PRBC transfusion (relax_d2)        | 3       | 1138         | Mean Difference (IV, Random, 95% CI) | -0.13 [-0.41, 0.14]  |

| Outcome or Subgroup                                                                | Studies | Participants | Statistical Method                   | Effect Estimate      |
|------------------------------------------------------------------------------------|---------|--------------|--------------------------------------|----------------------|
| 1.4 PaO <sub>2</sub> /FiO <sub>2</sub> (korovesi_d1-manzano_basal-relax_afterrand) | 8       | 1444         | Mean Difference (IV, Random, 95% CI) | 28.60 [3.69, 53.50]  |
| 1.5 PaO <sub>2</sub> /FiO <sub>2</sub> (korovesi_d1-manzano_basal-relax_d1)        | 8       | 1444         | Mean Difference (IV, Random, 95% CI) | 37.18 [17.84, 56.53] |

|                                                                                     |   |      |                                      |                      |
|-------------------------------------------------------------------------------------|---|------|--------------------------------------|----------------------|
| 1.6 PaO <sub>2</sub> /FiO <sub>2</sub> (korovesi_d1-manzano_basal-relax_d2)         | 8 | 1444 | Mean Difference (IV, Random, 95% CI) | 36.37 [17.09, 55.66] |
| 1.7 PaO <sub>2</sub> /FiO <sub>2</sub> (korovesi_d1-manzano_6h-relax_afterrand)     | 8 | 1444 | Mean Difference (IV, Random, 95% CI) | 29.70 [4.84, 54.56]  |
| 1.8 PaO <sub>2</sub> /FiO <sub>2</sub> (korovesi_d1-manzano_6h-relax_d1)            | 8 | 1444 | Mean Difference (IV, Random, 95% CI) | 38.95 [20.20, 57.70] |
| 1.9 PaO <sub>2</sub> /FiO <sub>2</sub> (korovesi_d1-manzano_6h-relax_d2)            | 8 | 1444 | Mean Difference (IV, Random, 95% CI) | 38.01 [19.22, 56.81] |
| 1.10 PaO <sub>2</sub> /FiO <sub>2</sub> (korovesi_d1-manzano_d1-relax_afterrand)    | 8 | 1444 | Mean Difference (IV, Random, 95% CI) | 33.94 [9.58, 58.29]  |
| 1.11 PaO <sub>2</sub> /FiO <sub>2</sub> (korovesi_d1-manzano_d1-relax_d1)           | 8 | 1444 | Mean Difference (IV, Random, 95% CI) | 43.71 [26.22, 61.20] |
| 1.12 PaO <sub>2</sub> /FiO <sub>2</sub> (korovesi_d1-manzano_d1-relax_d2)           | 8 | 1444 | Mean Difference (IV, Random, 95% CI) | 42.56 [24.81, 60.31] |
| 1.13 PaO <sub>2</sub> /FiO <sub>2</sub> (korovesi_d5-manzano_basal-relax_afterrand) | 8 | 1444 | Mean Difference (IV, Random, 95% CI) | 28.18 [3.27, 53.08]  |
| 1.14 PaO <sub>2</sub> /FiO <sub>2</sub> (korovesi_d5-manzano_basal-relax_d1)        | 8 | 1444 | Mean Difference (IV, Random, 95% CI) | 36.82 [17.43, 56.20] |
| 1.15 PaO <sub>2</sub> /FiO <sub>2</sub> (korovesi_d5-manzano_basal-relax_d2)        | 8 | 1444 | Mean Difference (IV, Random, 95% CI) | 36.01 [16.70, 55.33] |

|                                                                                  |   |      |                                      |                      |
|----------------------------------------------------------------------------------|---|------|--------------------------------------|----------------------|
| 1.16 PaO <sub>2</sub> /FiO <sub>2</sub> (korovesi_d5-manzano_6h-relax_afterrand) | 8 | 1444 | Mean Difference (IV, Random, 95% CI) | 29.28 [4.41, 54.14]  |
| 1.17 PaO <sub>2</sub> /FiO <sub>2</sub> (korovesi_d5-manzano_6h-relax_d1)        | 8 | 1444 | Mean Difference (IV, Random, 95% CI) | 38.58 [19.78, 57.38] |
| 1.18 PaO <sub>2</sub> /FiO <sub>2</sub> (korovesi_d5-manzano_6h-relax_d2)        | 8 | 1444 | Mean Difference (IV, Random, 95% CI) | 37.65 [18.82, 56.49] |
| 1.19 PaO <sub>2</sub> /FiO <sub>2</sub> (korovesi_d5-manzano_d1-relax_afterrand) | 8 | 1444 | Mean Difference (IV, Random, 95% CI) | 33.51 [9.15, 57.88]  |
| 1.20 PaO <sub>2</sub> /FiO <sub>2</sub> (korovesi_d5-manzano_d1-relax_d1)        | 8 | 1444 | Mean Difference (IV, Random, 95% CI) | 43.35 [25.80, 60.91] |
| 1.21 PaO <sub>2</sub> /FiO <sub>2</sub> (korovesi_d5-manzano_d1-relax_d2)        | 8 | 1444 | Mean Difference (IV, Random, 95% CI) | 42.22 [24.41, 60.02] |
| 1.22 PaO <sub>2</sub> /FiO <sub>2</sub> (korovesi_d1)                            | 8 | 1444 | Mean Difference (IV, Random, 95% CI) | 48.05 [31.50, 64.60] |
| 1.21 PaO <sub>2</sub> /FiO <sub>2</sub> (korovesi_d5)                            | 8 | 1444 | Mean Difference (IV, Random, 95% CI) | 47.68 [31.04, 64.32] |
| 1.22 PaO <sub>2</sub> /FiO <sub>2</sub> (manzano_basal)                          | 8 | 1444 | Mean Difference (IV, Random, 95% CI) | 43.04 [24.13, 61.95] |
| 1.23 PaO <sub>2</sub> /FiO <sub>2</sub> (manzano_6h)                             | 8 | 1444 | Mean Difference (IV, Random, 95% CI) | 44.98 [26.84, 63.12] |
| 1.24 PaO <sub>2</sub> /FiO <sub>2</sub> (manzano_d1)                             | 8 | 1444 | Mean Difference (IV, Random, 95% CI) | 49.78 [33.24, 66.32] |
| 1.25 PaO <sub>2</sub> /FiO <sub>2</sub> (relax_afterrand)                        | 8 | 1444 | Mean Difference (IV, Random, 95% CI) | 38.26 [13.53, 62.99] |



|                                                    |   |      |                                      |                      |
|----------------------------------------------------|---|------|--------------------------------------|----------------------|
| 1.26 PaO <sub>2</sub> /FiO <sub>2</sub> (relax_d1) | 8 | 1444 | Mean Difference (IV, Random, 95% CI) | 46.91 [29.19, 64.62] |
| 1.27 PaO <sub>2</sub> /FiO <sub>2</sub> (relax_d2) | 8 | 1444 | Mean Difference (IV, Random, 95% CI) | 45.79 [27.74, 63.85] |

### Sensitivity analyses: odds ratio

Sensitivity analyses according to the use of odds ratio instead of risk ratio as effect estimate in dichotomous variables. No difference with respect to the main meta-analyses was observed.

Abbreviations: M-H, Mantel–Haenszel; CI, confidence interval; ARDS, acute respiratory distress syndrome; ICU, intensive care unit.

| Outcome or Subgroup                 | Studies | Participants | Statistical Method               | Effect Estimate   |
|-------------------------------------|---------|--------------|----------------------------------|-------------------|
| 2.1 Hospital mortality              | 9       | 1502         | Odds Ratio (M-H, Random, 95% CI) | 1.03 [0.83, 1.29] |
| 2.2 Hypoxemia                       | 5       | 1320         | Odds Ratio (M-H, Random, 95% CI) | 0.43 [0.20, 0.94] |
| 2.3 Atelectasis                     | 5       | 1255         | Odds Ratio (M-H, Random, 95% CI) | 0.91 [0.59, 1.40] |
| 2.4 Barotrauma                      | 7       | 1372         | Odds Ratio (M-H, Random, 95% CI) | 0.67 [0.41, 1.10] |
| 2.5 Ventilator-associated pneumonia | 3       | 1188         | Odds Ratio (M-H, Random, 95% CI) | 0.60 [0.27, 1.35] |
| 2.6 ARDS                            | 6       | 1315         | Odds Ratio (M-H, Random, 95% CI) | 0.40 [0.23, 0.70] |
| 2.7 Hypotension                     | 5       | 283          | Odds Ratio (M-H, Random, 95% CI) | 1.39 [0.56, 3.44] |
| 2.8 ICU mortality                   | 5       | 1073         | Odds Ratio (M-H, Random, 95% CI) | 1.14 [0.88, 1.47] |

|                      |   |      |                                  |                   |
|----------------------|---|------|----------------------------------|-------------------|
| 2.9 28-day mortality | 3 | 1152 | Odds Ratio (M-H, Random, 95% CI) | 0.51 [0.15, 1.77] |
|----------------------|---|------|----------------------------------|-------------------|

**Sensitivity analyses: without studies at high risk of bias**

Sensitivity analyses after removing the studies at high risk of bias. Central venous pressure and the incidence of hypoxemia became not significantly different between the 2 groups. We observed a trend ( $p = 0.09$ ) towards a significantly decreased duration of ventilation with higher PEEP.

Abbreviations: M-H, Mantel–Haenszel; CI, confidence interval; PaO<sub>2</sub>/FiO<sub>2</sub>, arterial partial pressure of oxygen to fraction of inspired oxygen ratio; IV, inverse variance; ARDS, acute respiratory distress syndrome; CVP, central venous pressure; ICU, intensive care unit.

| <b>Outcome or Subgroup</b>             | <b>Studies</b> | <b>Participants</b> | <b>Statistical Method</b>            | <b>Effect Estimate</b> |
|----------------------------------------|----------------|---------------------|--------------------------------------|------------------------|
| 3.1 Hospital mortality                 | 4              | 1235                | Risk Ratio (M-H, Random, 95% CI)     | 1.07 [0.93, 1.24]      |
| 3.2 PaO <sub>2</sub> /FiO <sub>2</sub> | 6              | 1334                | Mean Difference (IV, Random, 95% CI) | 56.55 [42.12, 70.98]   |
| 3.3 Hypoxemia                          | 2              | 1096                | Risk Ratio (M-H, Random, 95% CI)     | 0.57 [0.23, 1.37]      |
| 3.4 Atelectasis                        | 2              | 1096                | Risk Ratio (M-H, Random, 95% CI)     | 0.71 [0.45, 1.13]      |
| 3.5 Barotrauma                         | 2              | 1096                | Risk Ratio (M-H, Random, 95% CI)     | 0.54 [0.28, 1.07]      |
| 3.6 Ventilator-associated pneumonia    | 2              | 1096                | Risk Ratio (M-H, Random, 95% CI)     | 0.61 [0.21, 1.83]      |
| 3.7 ARDS                               | 2              | 1096                | Risk Ratio (M-H, Random, 95% CI)     | 0.35 [0.16, 0.78]      |
| 3.8 Cardiac index                      | 2              | 112                 | Mean Difference (IV, Random, 95% CI) | 0.04 [-0.23, 0.30]     |
| 3.9 CVP                                | 2              | 91                  | Mean Difference (IV, Random, 95% CI) | 1.13 [-0.44, 2.70]     |

|                              |   |      |                                           |                     |
|------------------------------|---|------|-------------------------------------------|---------------------|
| 3.10 Duration of ventilation | 4 | 1243 | Std. Mean Difference (IV, Random, 95% CI) | -0.10 [-0.21, 0.01] |
| 3.11 ICU stay                | 3 | 1123 | Mean Difference (IV, Random, 95% CI)      | -0.88 [-2.15, 0.38] |
| 3.12 Hospital stay           | 3 | 1180 | Mean Difference (IV, Random, 95% CI)      | -0.73 [-3.21, 1.74] |
| 3.13 ICU mortality           | 2 | 995  | Risk Ratio (M-H, Random, 95% CI)          | 1.09 [0.92, 1.28]   |
| 3.14 28-day mortality        | 3 | 1152 | Risk Ratio (M-H, Random, 95% CI)          | 0.68 [0.33, 1.40]   |

## Forest plots of sensitivity analyses

### Sensitivity analysis (timing of measurement)

### Packed red blood cell transfusion (relax\_afterrand)

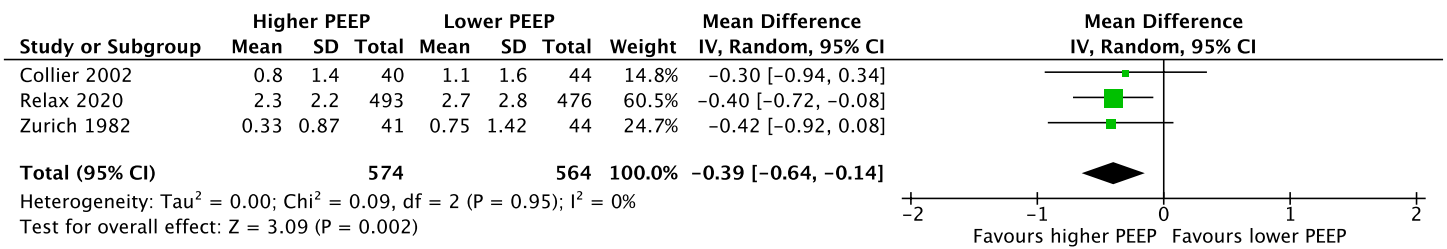

### Sensitivity analysis (timing of measurement)

### Packed red blood cell transfusion (relax\_d1)

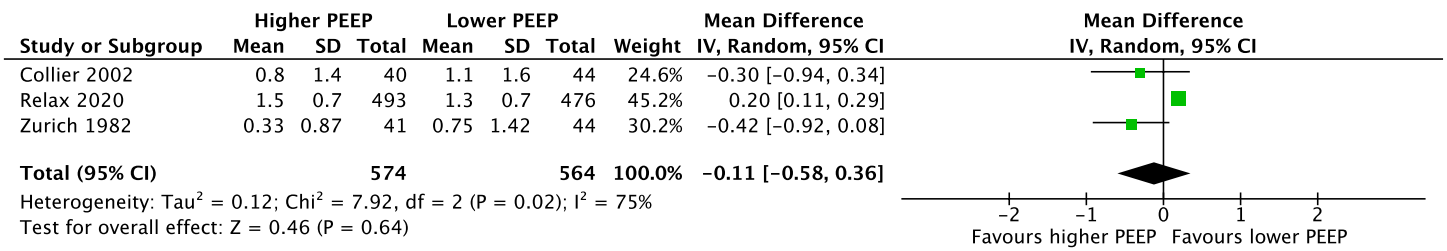

### Sensitivity analysis (timing of measurement)

### Packed red blood cell transfusion (relax\_d2)

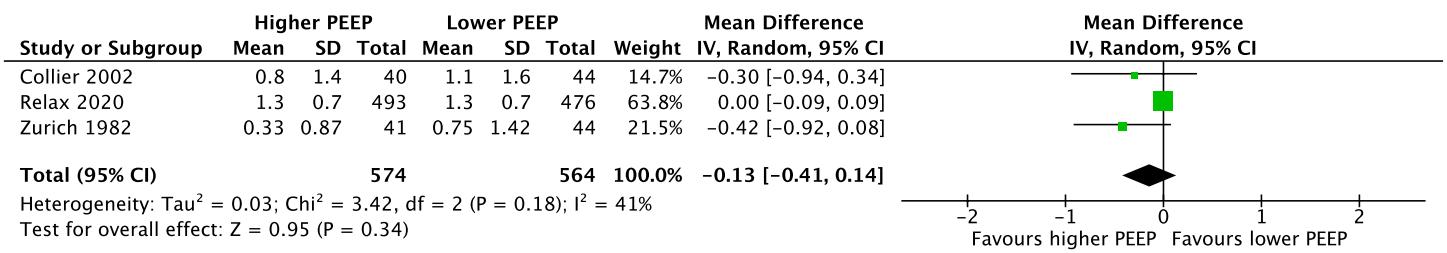

### Sensitivity analysis (timing of measurement)

#### PaO2/FiO2 (korovesi\_d1-manzano\_basal-relax\_afterrand)

| Study or Subgroup     | Higher PEEP |     |            | Lower PEEP |     |            | Weight        | Mean Difference<br>IV, Random, 95% CI |
|-----------------------|-------------|-----|------------|------------|-----|------------|---------------|---------------------------------------|
|                       | Mean        | SD  | Total      | Mean       | SD  | Total      |               |                                       |
| Holland 2007          | 307         | 82  | 14         | 337        | 82  | 14         | 8.9%          | -30.00 [-90.75, 30.75]                |
| Korovesi 2011         | 481         | 90  | 15         | 442        | 79  | 12         | 8.4%          | 39.00 [-24.81, 102.81]                |
| Koutsoukou 2006       | 409         | 65  | 11         | 437        | 74  | 10         | 9.1%          | -28.00 [-87.83, 31.83]                |
| Lago Borges 2013      | 328         | 85  | 45         | 270        | 90  | 44         | 13.5%         | 58.00 [21.61, 94.39]                  |
| Lesur 2010            | 293         | 135 | 30         | 228        | 67  | 33         | 10.1%         | 65.00 [11.56, 118.44]                 |
| Ma 2014               | 196         | 45  | 60         | 134        | 22  | 60         | 18.1%         | 62.00 [49.33, 74.67]                  |
| Manzano 2008          | 392         | 104 | 64         | 375        | 79  | 63         | 14.4%         | 17.00 [-15.09, 49.09]                 |
| Relax 2020            | 230         | 140 | 493        | 216        | 124 | 476        | 17.5%         | 14.00 [-2.64, 30.64]                  |
| <b>Total (95% CI)</b> |             |     | <b>732</b> |            |     | <b>712</b> | <b>100.0%</b> | <b>28.60 [3.69, 53.50]</b>            |

Heterogeneity: Tau<sup>2</sup> = 851.49; Chi<sup>2</sup> = 34.77, df = 7 (P < 0.0001); I<sup>2</sup> = 80%  
 Test for overall effect: Z = 2.25 (P = 0.02)

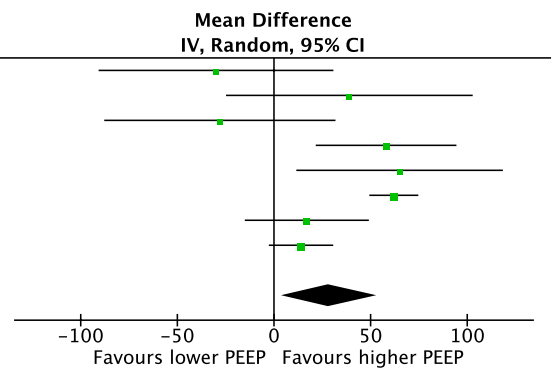

**Sensitivity analysis (timing of measurement)**

**PaO2/FiO2 (korovesi\_d1-manzano\_basal-relax\_d1)**

| Study or Subgroup     | Higher PEEP |     |            | Lower PEEP |     |            | Weight        | Mean Difference<br>IV, Random, 95% CI |
|-----------------------|-------------|-----|------------|------------|-----|------------|---------------|---------------------------------------|
|                       | Mean        | SD  | Total      | Mean       | SD  | Total      |               |                                       |
| Holland 2007          | 307         | 82  | 14         | 337        | 82  | 14         | 7.1%          | -30.00 [-90.75, 30.75]                |
| Korovesi 2011         | 481         | 90  | 15         | 442        | 79  | 12         | 6.6%          | 39.00 [-24.81, 102.81]                |
| Koutsoukou 2006       | 409         | 65  | 11         | 437        | 74  | 10         | 7.3%          | -28.00 [-87.83, 31.83]                |
| Lago Borges 2013      | 328         | 85  | 45         | 270        | 90  | 44         | 13.0%         | 58.00 [21.61, 94.39]                  |
| Lesur 2010            | 293         | 135 | 30         | 228        | 67  | 33         | 8.5%          | 65.00 [11.56, 118.44]                 |
| Ma 2014               | 196         | 45  | 60         | 134        | 22  | 60         | 21.8%         | 62.00 [49.33, 74.67]                  |
| Manzano 2008          | 392         | 104 | 64         | 375        | 79  | 63         | 14.5%         | 17.00 [-15.09, 49.09]                 |
| Relax 2020            | 272         | 126 | 493        | 226        | 101 | 476        | 21.2%         | 46.00 [31.65, 60.35]                  |
| <b>Total (95% CI)</b> |             |     | <b>732</b> |            |     | <b>712</b> | <b>100.0%</b> | <b>37.18 [17.84, 56.53]</b>           |

Heterogeneity: Tau<sup>2</sup> = 405.32; Chi<sup>2</sup> = 21.56, df = 7 (P = 0.003); I<sup>2</sup> = 68%  
 Test for overall effect: Z = 3.77 (P = 0.0002)

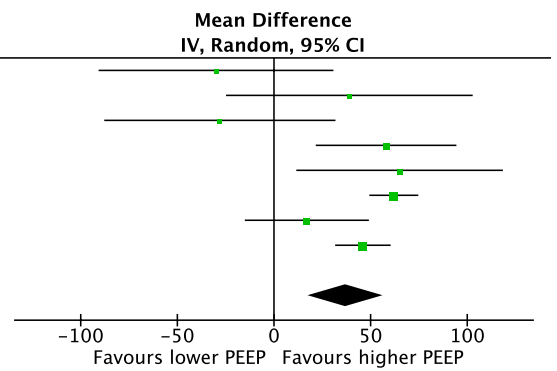



### Sensitivity analysis (timing of measurement)

#### PaO2/FiO2 (korovesi\_d1-manzano\_basal-relax\_d2)

| Study or Subgroup     | Higher PEEP |     |            | Lower PEEP |    |            | Weight        | Mean Difference<br>IV, Random, 95% CI |
|-----------------------|-------------|-----|------------|------------|----|------------|---------------|---------------------------------------|
|                       | Mean        | SD  | Total      | Mean       | SD | Total      |               |                                       |
| Holland 2007          | 307         | 82  | 14         | 337        | 82 | 14         | 7.1%          | -30.00 [-90.75, 30.75]                |
| Korovesi 2011         | 481         | 90  | 15         | 442        | 79 | 12         | 6.6%          | 39.00 [-24.81, 102.81]                |
| Koutsoukou 2006       | 409         | 65  | 11         | 437        | 74 | 10         | 7.2%          | -28.00 [-87.83, 31.83]                |
| Lago Borges 2013      | 328         | 85  | 45         | 270        | 90 | 44         | 12.9%         | 58.00 [21.61, 94.39]                  |
| Lesur 2010            | 293         | 135 | 30         | 228        | 67 | 33         | 8.4%          | 65.00 [11.56, 118.44]                 |
| Ma 2014               | 196         | 45  | 60         | 134        | 22 | 60         | 21.7%         | 62.00 [49.33, 74.67]                  |
| Manzano 2008          | 392         | 104 | 64         | 375        | 79 | 63         | 14.4%         | 17.00 [-15.09, 49.09]                 |
| Relax 2020            | 250         | 113 | 493        | 208        | 96 | 476        | 21.6%         | 42.00 [28.81, 55.19]                  |
| <b>Total (95% CI)</b> |             |     | <b>732</b> |            |    | <b>712</b> | <b>100.0%</b> | <b>36.37 [17.09, 55.66]</b>           |

Heterogeneity: Tau<sup>2</sup> = 403.81; Chi<sup>2</sup> = 22.34, df = 7 (P = 0.002); I<sup>2</sup> = 69%  
 Test for overall effect: Z = 3.70 (P = 0.0002)

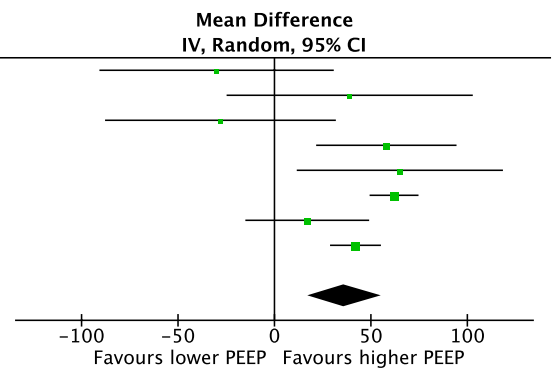

**Sensitivity analysis (timing of measurement)**

**PaO2/FiO2 (korovesi\_d1-manzano\_6h-relax\_afterrand)**

| Study or Subgroup     | Higher PEEP |     |            | Lower PEEP |     |            | Weight        | Mean Difference<br>IV, Random, 95% CI |
|-----------------------|-------------|-----|------------|------------|-----|------------|---------------|---------------------------------------|
|                       | Mean        | SD  | Total      | Mean       | SD  | Total      |               |                                       |
| Holland 2007          | 307         | 82  | 14         | 337        | 82  | 14         | 9.0%          | -30.00 [-90.75, 30.75]                |
| Korovesi 2011         | 481         | 90  | 15         | 442        | 79  | 12         | 8.5%          | 39.00 [-24.81, 102.81]                |
| Koutsoukou 2006       | 409         | 65  | 11         | 437        | 74  | 10         | 9.1%          | -28.00 [-87.83, 31.83]                |
| Lago Borges 2013      | 328         | 85  | 45         | 270        | 90  | 44         | 13.6%         | 58.00 [21.61, 94.39]                  |
| Lesur 2010            | 293         | 135 | 30         | 228        | 67  | 33         | 10.2%         | 65.00 [11.56, 118.44]                 |
| Ma 2014               | 196         | 45  | 60         | 134        | 22  | 60         | 18.3%         | 62.00 [49.33, 74.67]                  |
| Manzano 2008          | 356         | 100 | 64         | 332        | 108 | 63         | 13.7%         | 24.00 [-12.21, 60.21]                 |
| Relax 2020            | 230         | 140 | 493        | 216        | 124 | 476        | 17.7%         | 14.00 [-2.64, 30.64]                  |
| <b>Total (95% CI)</b> |             |     | <b>732</b> |            |     | <b>712</b> | <b>100.0%</b> | <b>29.70 [4.84, 54.56]</b>            |

Heterogeneity: Tau<sup>2</sup> = 836.73; Chi<sup>2</sup> = 33.48, df = 7 (P < 0.0001); I<sup>2</sup> = 79%  
 Test for overall effect: Z = 2.34 (P = 0.02)

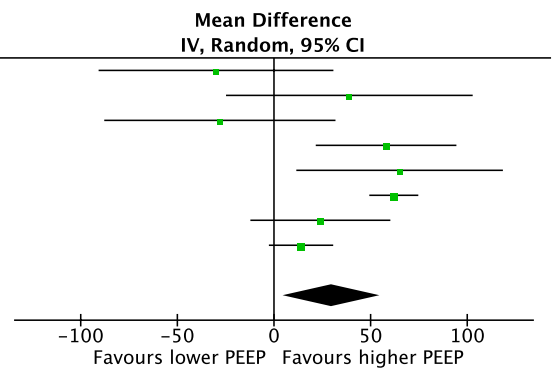

### Sensitivity analysis (timing of measurement)

#### PaO2/FiO2 (korovesi\_d1-manzano\_6h-relax\_d1)

| Study or Subgroup     | Higher PEEP |     |            | Lower PEEP |     |            | Weight        | Mean Difference<br>IV, Random, 95% CI |
|-----------------------|-------------|-----|------------|------------|-----|------------|---------------|---------------------------------------|
|                       | Mean        | SD  | Total      | Mean       | SD  | Total      |               |                                       |
| Holland 2007          | 307         | 82  | 14         | 337        | 82  | 14         | 6.9%          | -30.00 [-90.75, 30.75]                |
| Korovesi 2011         | 481         | 90  | 15         | 442        | 79  | 12         | 6.5%          | 39.00 [-24.81, 102.81]                |
| Koutsoukou 2006       | 409         | 65  | 11         | 437        | 74  | 10         | 7.1%          | -28.00 [-87.83, 31.83]                |
| Lago Borges 2013      | 328         | 85  | 45         | 270        | 90  | 44         | 13.0%         | 58.00 [21.61, 94.39]                  |
| Lesur 2010            | 293         | 135 | 30         | 228        | 67  | 33         | 8.3%          | 65.00 [11.56, 118.44]                 |
| Ma 2014               | 196         | 45  | 60         | 134        | 22  | 60         | 22.9%         | 62.00 [49.33, 74.67]                  |
| Manzano 2008          | 356         | 100 | 64         | 332        | 108 | 63         | 13.1%         | 24.00 [-12.21, 60.21]                 |
| Relax 2020            | 272         | 126 | 493        | 226        | 101 | 476        | 22.2%         | 46.00 [31.65, 60.35]                  |
| <b>Total (95% CI)</b> |             |     | <b>732</b> |            |     | <b>712</b> | <b>100.0%</b> | <b>38.95 [20.20, 57.70]</b>           |

Heterogeneity: Tau<sup>2</sup> = 358.05; Chi<sup>2</sup> = 19.52, df = 7 (P = 0.007); I<sup>2</sup> = 64%  
 Test for overall effect: Z = 4.07 (P < 0.0001)

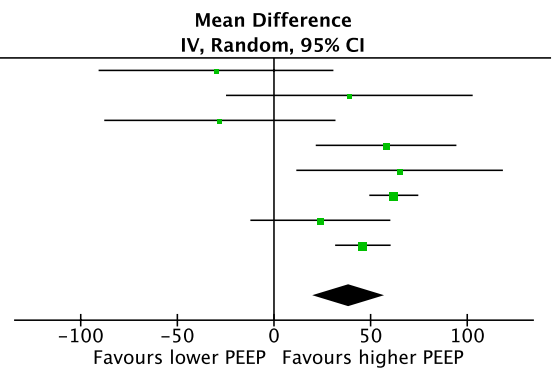

### Sensitivity analysis (timing of measurement)

#### PaO2/FiO2 (korovesi\_d1-manzano\_6h-relax\_d2)

| Study or Subgroup     | Higher PEEP |     |            | Lower PEEP |     |            | Weight        | Mean Difference<br>IV, Random, 95% CI |
|-----------------------|-------------|-----|------------|------------|-----|------------|---------------|---------------------------------------|
|                       | Mean        | SD  | Total      | Mean       | SD  | Total      |               |                                       |
| Holland 2007          | 307         | 82  | 14         | 337        | 82  | 14         | 6.9%          | -30.00 [-90.75, 30.75]                |
| Korovesi 2011         | 481         | 90  | 15         | 442        | 79  | 12         | 6.5%          | 39.00 [-24.81, 102.81]                |
| Koutsoukou 2006       | 409         | 65  | 11         | 437        | 74  | 10         | 7.1%          | -28.00 [-87.83, 31.83]                |
| Lago Borges 2013      | 328         | 85  | 45         | 270        | 90  | 44         | 13.0%         | 58.00 [21.61, 94.39]                  |
| Lesur 2010            | 293         | 135 | 30         | 228        | 67  | 33         | 8.3%          | 65.00 [11.56, 118.44]                 |
| Ma 2014               | 196         | 45  | 60         | 134        | 22  | 60         | 22.7%         | 62.00 [49.33, 74.67]                  |
| Manzano 2008          | 356         | 100 | 64         | 332        | 108 | 63         | 13.0%         | 24.00 [-12.21, 60.21]                 |
| Relax 2020            | 250         | 113 | 493        | 208        | 96  | 476        | 22.5%         | 42.00 [28.81, 55.19]                  |
| <b>Total (95% CI)</b> |             |     | <b>732</b> |            |     | <b>712</b> | <b>100.0%</b> | <b>38.01 [19.22, 56.81]</b>           |

Heterogeneity:  $\tau^2 = 363.63$ ;  $\text{Chi}^2 = 20.46$ ,  $\text{df} = 7$  ( $P = 0.005$ );  $I^2 = 66\%$   
 Test for overall effect:  $Z = 3.96$  ( $P < 0.0001$ )

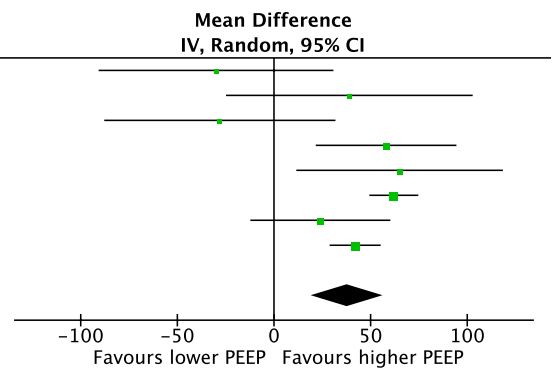

### Sensitivity analysis (timing of measurement)

#### PaO2/FiO2 (korovesi\_d1-manzano\_d1-relax\_afterrand)

| Study or Subgroup     | Higher PEEP |     |            | Lower PEEP |     |            | Weight        | Mean Difference<br>IV, Random, 95% CI |
|-----------------------|-------------|-----|------------|------------|-----|------------|---------------|---------------------------------------|
|                       | Mean        | SD  | Total      | Mean       | SD  | Total      |               |                                       |
| Holland 2007          | 307         | 82  | 14         | 337        | 82  | 14         | 8.8%          | -30.00 [-90.75, 30.75]                |
| Korovesi 2011         | 481         | 90  | 15         | 442        | 79  | 12         | 8.3%          | 39.00 [-24.81, 102.81]                |
| Koutsoukou 2006       | 409         | 65  | 11         | 437        | 74  | 10         | 8.9%          | -28.00 [-87.83, 31.83]                |
| Lago Borges 2013      | 328         | 85  | 45         | 270        | 90  | 44         | 13.5%         | 58.00 [21.61, 94.39]                  |
| Lesur 2010            | 293         | 135 | 30         | 228        | 67  | 33         | 10.0%         | 65.00 [11.56, 118.44]                 |
| Ma 2014               | 196         | 45  | 60         | 134        | 22  | 60         | 18.4%         | 62.00 [49.33, 74.67]                  |
| Manzano 2008          | 362         | 101 | 64         | 309        | 86  | 63         | 14.4%         | 53.00 [20.39, 85.61]                  |
| Relax 2020            | 230         | 140 | 493        | 216        | 124 | 476        | 17.7%         | 14.00 [-2.64, 30.64]                  |
| <b>Total (95% CI)</b> |             |     | <b>732</b> |            |     | <b>712</b> | <b>100.0%</b> | <b>33.94 [9.58, 58.29]</b>            |

Heterogeneity:  $\tau^2 = 798.91$ ;  $\text{Chi}^2 = 32.94$ ,  $\text{df} = 7$  ( $P < 0.0001$ );  $I^2 = 79\%$   
 Test for overall effect:  $Z = 2.73$  ( $P = 0.006$ )

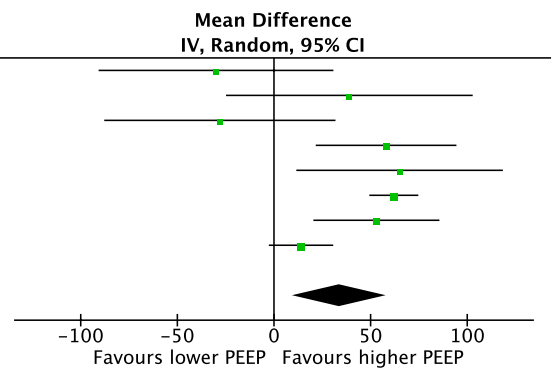

**Sensitivity analysis (timing of measurement)**

**PaO2/FiO2 (korovesi\_d1-manzano\_d1-relax\_d1)**

| Study or Subgroup     | Higher PEEP |     |            | Lower PEEP |     |            | Weight        | Mean Difference<br>IV, Random, 95% CI |
|-----------------------|-------------|-----|------------|------------|-----|------------|---------------|---------------------------------------|
|                       | Mean        | SD  | Total      | Mean       | SD  | Total      |               |                                       |
| Holland 2007          | 307         | 82  | 14         | 337        | 82  | 14         | 6.4%          | -30.00 [-90.75, 30.75]                |
| Korovesi 2011         | 481         | 90  | 15         | 442        | 79  | 12         | 5.9%          | 39.00 [-24.81, 102.81]                |
| Koutsoukou 2006       | 409         | 65  | 11         | 437        | 74  | 10         | 6.5%          | -28.00 [-87.83, 31.83]                |
| Lago Borges 2013      | 328         | 85  | 45         | 270        | 90  | 44         | 12.5%         | 58.00 [21.61, 94.39]                  |
| Lesur 2010            | 293         | 135 | 30         | 228        | 67  | 33         | 7.7%          | 65.00 [11.56, 118.44]                 |
| Ma 2014               | 196         | 45  | 60         | 134        | 22  | 60         | 23.9%         | 62.00 [49.33, 74.67]                  |
| Manzano 2008          | 362         | 101 | 64         | 309        | 86  | 63         | 14.0%         | 53.00 [20.39, 85.61]                  |
| Relax 2020            | 272         | 126 | 493        | 226        | 101 | 476        | 23.1%         | 46.00 [31.65, 60.35]                  |
| <b>Total (95% CI)</b> |             |     | <b>732</b> |            |     | <b>712</b> | <b>100.0%</b> | <b>43.71 [26.22, 61.20]</b>           |

Heterogeneity: Tau<sup>2</sup> = 291.19; Chi<sup>2</sup> = 17.42, df = 7 (P = 0.01); I<sup>2</sup> = 60%  
 Test for overall effect: Z = 4.90 (P < 0.00001)

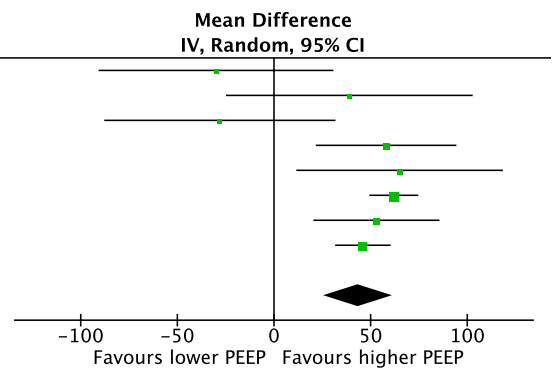

### Sensitivity analysis (timing of measurement)

#### PaO2/FiO2 (korovesi\_d1-manzano\_d1-relax\_d2)

| Study or Subgroup     | Higher PEEP |     |            | Lower PEEP |    |            | Weight        | Mean Difference<br>IV, Random, 95% CI |
|-----------------------|-------------|-----|------------|------------|----|------------|---------------|---------------------------------------|
|                       | Mean        | SD  | Total      | Mean       | SD | Total      |               |                                       |
| Holland 2007          | 307         | 82  | 14         | 337        | 82 | 14         | 6.5%          | -30.00 [-90.75, 30.75]                |
| Korovesi 2011         | 481         | 90  | 15         | 442        | 79 | 12         | 6.0%          | 39.00 [-24.81, 102.81]                |
| Koutsoukou 2006       | 409         | 65  | 11         | 437        | 74 | 10         | 6.6%          | -28.00 [-87.83, 31.83]                |
| Lago Borges 2013      | 328         | 85  | 45         | 270        | 90 | 44         | 12.6%         | 58.00 [21.61, 94.39]                  |
| Lesur 2010            | 293         | 135 | 30         | 228        | 67 | 33         | 7.8%          | 65.00 [11.56, 118.44]                 |
| Ma 2014               | 196         | 45  | 60         | 134        | 22 | 60         | 23.4%         | 62.00 [49.33, 74.67]                  |
| Manzano 2008          | 362         | 101 | 64         | 309        | 86 | 63         | 14.0%         | 53.00 [20.39, 85.61]                  |
| Relax 2020            | 250         | 113 | 493        | 208        | 96 | 476        | 23.2%         | 42.00 [28.81, 55.19]                  |
| <b>Total (95% CI)</b> |             |     | <b>732</b> |            |    | <b>712</b> | <b>100.0%</b> | <b>42.56 [24.81, 60.31]</b>           |

Heterogeneity: Tau<sup>2</sup> = 308.74; Chi<sup>2</sup> = 18.68, df = 7 (P = 0.009); I<sup>2</sup> = 63%  
 Test for overall effect: Z = 4.70 (P < 0.00001)

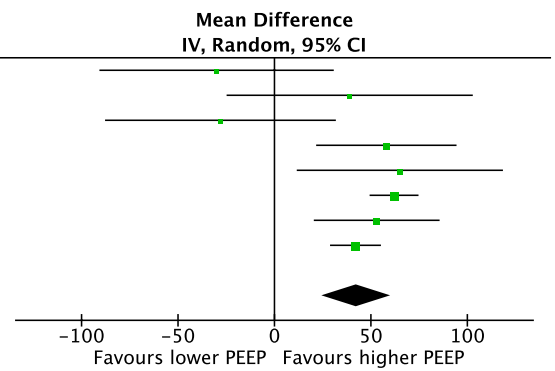

## Sensitivity analysis (timing of measurement)

### PaO2/FiO2 (korovesi\_d5-manzano\_basal-relax\_aftertrand)

| Study or Subgroup     | Higher PEEP |     |            | Lower PEEP |     |            | Weight        | Mean Difference<br>IV, Random, 95% CI |
|-----------------------|-------------|-----|------------|------------|-----|------------|---------------|---------------------------------------|
|                       | Mean        | SD  | Total      | Mean       | SD  | Total      |               |                                       |
| Holland 2007          | 307         | 82  | 14         | 337        | 82  | 14         | 8.9%          | -30.00 [-90.75, 30.75]                |
| Korovesi 2011         | 441         | 97  | 15         | 407        | 71  | 12         | 8.5%          | 34.00 [-29.43, 97.43]                 |
| Koutsoukou 2006       | 409         | 65  | 11         | 437        | 74  | 10         | 9.1%          | -28.00 [-87.83, 31.83]                |
| Lago Borges 2013      | 328         | 85  | 45         | 270        | 90  | 44         | 13.5%         | 58.00 [21.61, 94.39]                  |
| Lesur 2010            | 293         | 135 | 30         | 228        | 67  | 33         | 10.1%         | 65.00 [11.56, 118.44]                 |
| Ma 2014               | 196         | 45  | 60         | 134        | 22  | 60         | 18.1%         | 62.00 [49.33, 74.67]                  |
| Manzano 2008          | 392         | 104 | 64         | 375        | 79  | 63         | 14.4%         | 17.00 [-15.09, 49.09]                 |
| Relax 2020            | 230         | 140 | 493        | 216        | 124 | 476        | 17.5%         | 14.00 [-2.64, 30.64]                  |
| <b>Total (95% CI)</b> |             |     | <b>732</b> |            |     | <b>712</b> | <b>100.0%</b> | <b>28.18 [3.27, 53.08]</b>            |

Heterogeneity: Tau<sup>2</sup> = 852.22; Chi<sup>2</sup> = 34.80, df = 7 (P < 0.0001); I<sup>2</sup> = 80%  
 Test for overall effect: Z = 2.22 (P = 0.03)

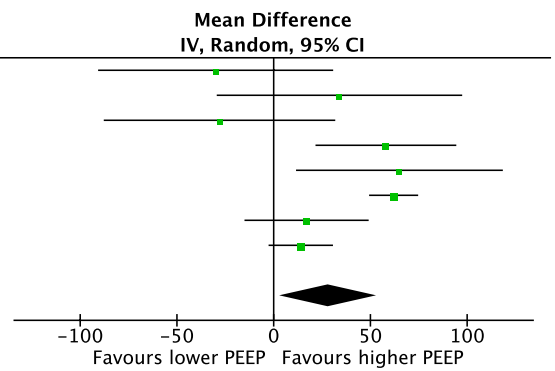



### Sensitivity analysis (timing of measurement)

#### PaO2/FiO2 (korovesi\_d5-manzano\_basal-relax\_d1)

| Study or Subgroup     | Higher PEEP |     |            | Lower PEEP |     |            | Weight        | Mean Difference<br>IV, Random, 95% CI |
|-----------------------|-------------|-----|------------|------------|-----|------------|---------------|---------------------------------------|
|                       | Mean        | SD  | Total      | Mean       | SD  | Total      |               |                                       |
| Holland 2007          | 307         | 82  | 14         | 337        | 82  | 14         | 7.1%          | -30.00 [-90.75, 30.75]                |
| Korovesi 2011         | 441         | 97  | 15         | 407        | 71  | 12         | 6.7%          | 34.00 [-29.43, 97.43]                 |
| Koutsoukou 2006       | 409         | 65  | 11         | 437        | 74  | 10         | 7.3%          | -28.00 [-87.83, 31.83]                |
| Lago Borges 2013      | 328         | 85  | 45         | 270        | 90  | 44         | 13.0%         | 58.00 [21.61, 94.39]                  |
| Lesur 2010            | 293         | 135 | 30         | 228        | 67  | 33         | 8.5%          | 65.00 [11.56, 118.44]                 |
| Ma 2014               | 196         | 45  | 60         | 134        | 22  | 60         | 21.7%         | 62.00 [49.33, 74.67]                  |
| Manzano 2008          | 392         | 104 | 64         | 375        | 79  | 63         | 14.5%         | 17.00 [-15.09, 49.09]                 |
| Relax 2020            | 272         | 126 | 493        | 226        | 101 | 476        | 21.2%         | 46.00 [31.65, 60.35]                  |
| <b>Total (95% CI)</b> |             |     | <b>732</b> |            |     | <b>712</b> | <b>100.0%</b> | <b>36.82 [17.43, 56.20]</b>           |

Heterogeneity:  $\tau^2 = 408.54$ ;  $\chi^2 = 21.68$ ,  $df = 7$  ( $P = 0.003$ );  $I^2 = 68\%$   
 Test for overall effect:  $Z = 3.72$  ( $P = 0.0002$ )

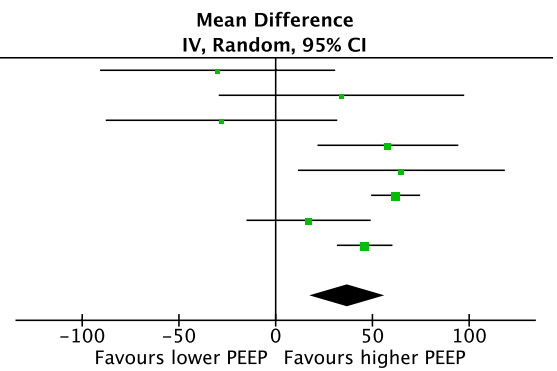

### Sensitivity analysis (timing of measurement)

#### PaO2/FiO2 (korovesi\_d5-manzano\_basal-relax\_d2)

| Study or Subgroup     | Higher PEEP |     |            | Lower PEEP |    |            | Weight        | Mean Difference<br>IV, Random, 95% CI |
|-----------------------|-------------|-----|------------|------------|----|------------|---------------|---------------------------------------|
|                       | Mean        | SD  | Total      | Mean       | SD | Total      |               |                                       |
| Holland 2007          | 307         | 82  | 14         | 337        | 82 | 14         | 7.1%          | -30.00 [-90.75, 30.75]                |
| Korovesi 2011         | 441         | 97  | 15         | 407        | 71 | 12         | 6.7%          | 34.00 [-29.43, 97.43]                 |
| Koutsoukou 2006       | 409         | 65  | 11         | 437        | 74 | 10         | 7.3%          | -28.00 [-87.83, 31.83]                |
| Lago Borges 2013      | 328         | 85  | 45         | 270        | 90 | 44         | 12.9%         | 58.00 [21.61, 94.39]                  |
| Lesur 2010            | 293         | 135 | 30         | 228        | 67 | 33         | 8.4%          | 65.00 [11.56, 118.44]                 |
| Ma 2014               | 196         | 45  | 60         | 134        | 22 | 60         | 21.7%         | 62.00 [49.33, 74.67]                  |
| Manzano 2008          | 392         | 104 | 64         | 375        | 79 | 63         | 14.4%         | 17.00 [-15.09, 49.09]                 |
| Relax 2020            | 250         | 113 | 493        | 208        | 96 | 476        | 21.5%         | 42.00 [28.81, 55.19]                  |
| <b>Total (95% CI)</b> |             |     | <b>732</b> |            |    | <b>712</b> | <b>100.0%</b> | <b>36.01 [16.70, 55.33]</b>           |

Heterogeneity: Tau<sup>2</sup> = 406.40; Chi<sup>2</sup> = 22.44, df = 7 (P = 0.002); I<sup>2</sup> = 69%  
 Test for overall effect: Z = 3.65 (P = 0.0003)

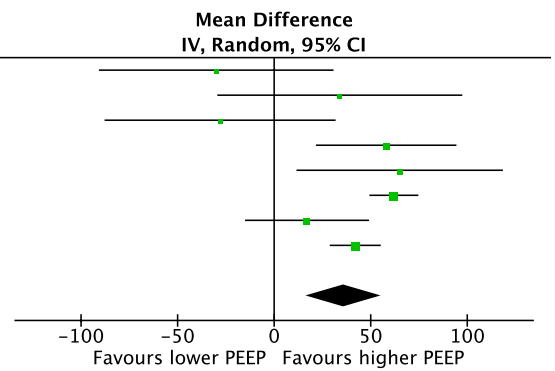

### Sensitivity analysis (timing of measurement)

#### PaO2/FiO2 (korovesi\_d5-manzano\_6h-relax\_afterrand)

| Study or Subgroup     | Higher PEEP |     |            | Lower PEEP |     |            | Weight        | Mean Difference<br>IV, Random, 95% CI |
|-----------------------|-------------|-----|------------|------------|-----|------------|---------------|---------------------------------------|
|                       | Mean        | SD  | Total      | Mean       | SD  | Total      |               |                                       |
| Holland 2007          | 307         | 82  | 14         | 337        | 82  | 14         | 8.9%          | -30.00 [-90.75, 30.75]                |
| Korovesi 2011         | 441         | 97  | 15         | 407        | 71  | 12         | 8.5%          | 34.00 [-29.43, 97.43]                 |
| Koutsoukou 2006       | 409         | 65  | 11         | 437        | 74  | 10         | 9.1%          | -28.00 [-87.83, 31.83]                |
| Lago Borges 2013      | 328         | 85  | 45         | 270        | 90  | 44         | 13.6%         | 58.00 [21.61, 94.39]                  |
| Lesur 2010            | 293         | 135 | 30         | 228        | 67  | 33         | 10.2%         | 65.00 [11.56, 118.44]                 |
| Ma 2014               | 196         | 45  | 60         | 134        | 22  | 60         | 18.3%         | 62.00 [49.33, 74.67]                  |
| Manzano 2008          | 356         | 100 | 64         | 332        | 108 | 63         | 13.6%         | 24.00 [-12.21, 60.21]                 |
| Relax 2020            | 230         | 140 | 493        | 216        | 124 | 476        | 17.7%         | 14.00 [-2.64, 30.64]                  |
| <b>Total (95% CI)</b> |             |     | <b>732</b> |            |     | <b>712</b> | <b>100.0%</b> | <b>29.28 [4.41, 54.14]</b>            |

Heterogeneity: Tau<sup>2</sup> = 837.74; Chi<sup>2</sup> = 33.53, df = 7 (P < 0.0001); I<sup>2</sup> = 79%  
 Test for overall effect: Z = 2.31 (P = 0.02)

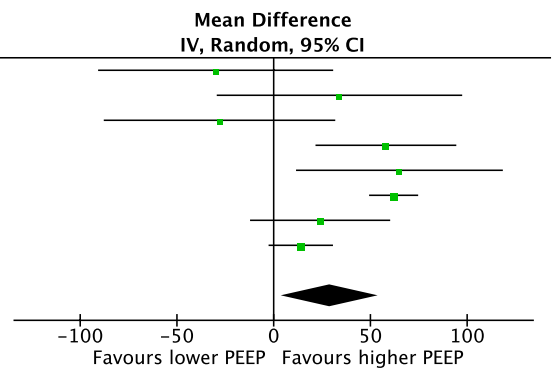

### Sensitivity analysis (timing of measurement)

#### PaO<sub>2</sub>/FiO<sub>2</sub> (korovesi\_d5-manzano\_6h-relax\_d1)

| Study or Subgroup     | Higher PEEP |     |            | Lower PEEP |     |            | Weight        | Mean Difference<br>IV, Random, 95% CI |
|-----------------------|-------------|-----|------------|------------|-----|------------|---------------|---------------------------------------|
|                       | Mean        | SD  | Total      | Mean       | SD  | Total      |               |                                       |
| Holland 2007          | 307         | 82  | 14         | 337        | 82  | 14         | 7.0%          | -30.00 [-90.75, 30.75]                |
| Korovesi 2011         | 441         | 97  | 15         | 407        | 71  | 12         | 6.5%          | 34.00 [-29.43, 97.43]                 |
| Koutsoukou 2006       | 409         | 65  | 11         | 437        | 74  | 10         | 7.1%          | -28.00 [-87.83, 31.83]                |
| Lago Borges 2013      | 328         | 85  | 45         | 270        | 90  | 44         | 13.0%         | 58.00 [21.61, 94.39]                  |
| Lesur 2010            | 293         | 135 | 30         | 228        | 67  | 33         | 8.3%          | 65.00 [11.56, 118.44]                 |
| Ma 2014               | 196         | 45  | 60         | 134        | 22  | 60         | 22.8%         | 62.00 [49.33, 74.67]                  |
| Manzano 2008          | 356         | 100 | 64         | 332        | 108 | 63         | 13.1%         | 24.00 [-12.21, 60.21]                 |
| Relax 2020            | 272         | 126 | 493        | 226        | 101 | 476        | 22.2%         | 46.00 [31.65, 60.35]                  |
| <b>Total (95% CI)</b> |             |     | <b>732</b> |            |     | <b>712</b> | <b>100.0%</b> | <b>38.58 [19.78, 57.38]</b>           |

Heterogeneity: Tau<sup>2</sup> = 361.62; Chi<sup>2</sup> = 19.65, df = 7 (P = 0.006); I<sup>2</sup> = 64%  
 Test for overall effect: Z = 4.02 (P < 0.0001)

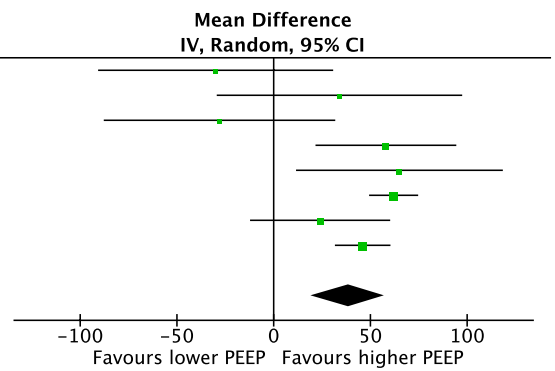

### Sensitivity analysis (timing of measurement)

#### PaO2/FiO2 (korovesi\_d5-manzano\_6h-relax\_d2)

| Study or Subgroup     | Higher PEEP |     |            | Lower PEEP |     |            | Weight        | Mean Difference<br>IV, Random, 95% CI |
|-----------------------|-------------|-----|------------|------------|-----|------------|---------------|---------------------------------------|
|                       | Mean        | SD  | Total      | Mean       | SD  | Total      |               |                                       |
| Holland 2007          | 307         | 82  | 14         | 337        | 82  | 14         | 7.0%          | -30.00 [-90.75, 30.75]                |
| Korovesi 2011         | 441         | 97  | 15         | 407        | 71  | 12         | 6.5%          | 34.00 [-29.43, 97.43]                 |
| Koutsoukou 2006       | 409         | 65  | 11         | 437        | 74  | 10         | 7.1%          | -28.00 [-87.83, 31.83]                |
| Lago Borges 2013      | 328         | 85  | 45         | 270        | 90  | 44         | 13.0%         | 58.00 [21.61, 94.39]                  |
| Lesur 2010            | 293         | 135 | 30         | 228        | 67  | 33         | 8.3%          | 65.00 [11.56, 118.44]                 |
| Ma 2014               | 196         | 45  | 60         | 134        | 22  | 60         | 22.6%         | 62.00 [49.33, 74.67]                  |
| Manzano 2008          | 356         | 100 | 64         | 332        | 108 | 63         | 13.0%         | 24.00 [-12.21, 60.21]                 |
| Relax 2020            | 250         | 113 | 493        | 208        | 96  | 476        | 22.4%         | 42.00 [28.81, 55.19]                  |
| <b>Total (95% CI)</b> |             |     | <b>732</b> |            |     | <b>712</b> | <b>100.0%</b> | <b>37.65 [18.82, 56.49]</b>           |

Heterogeneity:  $\tau^2 = 366.52$ ;  $\chi^2 = 20.57$ ,  $df = 7$  ( $P = 0.004$ );  $I^2 = 66\%$   
 Test for overall effect:  $Z = 3.92$  ( $P < 0.0001$ )

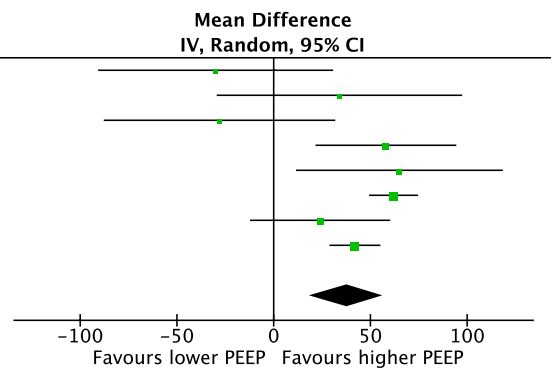

**Sensitivity analysis (timing of measurement)**

**PaO2/FiO2 (korovesi\_d5-manzano\_d1-relax\_afterrand)**

| Study or Subgroup     | Higher PEEP |     |            | Lower PEEP |     |            | Weight        | Mean Difference<br>IV, Random, 95% CI |
|-----------------------|-------------|-----|------------|------------|-----|------------|---------------|---------------------------------------|
|                       | Mean        | SD  | Total      | Mean       | SD  | Total      |               |                                       |
| Holland 2007          | 307         | 82  | 14         | 337        | 82  | 14         | 8.8%          | -30.00 [-90.75, 30.75]                |
| Korovesi 2011         | 441         | 97  | 15         | 407        | 71  | 12         | 8.4%          | 34.00 [-29.43, 97.43]                 |
| Koutsoukou 2006       | 409         | 65  | 11         | 437        | 74  | 10         | 8.9%          | -28.00 [-87.83, 31.83]                |
| Lago Borges 2013      | 328         | 85  | 45         | 270        | 90  | 44         | 13.5%         | 58.00 [21.61, 94.39]                  |
| Lesur 2010            | 293         | 135 | 30         | 228        | 67  | 33         | 10.0%         | 65.00 [11.56, 118.44]                 |
| Ma 2014               | 196         | 45  | 60         | 134        | 22  | 60         | 18.4%         | 62.00 [49.33, 74.67]                  |
| Manzano 2008          | 362         | 101 | 64         | 309        | 86  | 63         | 14.3%         | 53.00 [20.39, 85.61]                  |
| Relax 2020            | 230         | 140 | 493        | 216        | 124 | 476        | 17.7%         | 14.00 [-2.64, 30.64]                  |
| <b>Total (95% CI)</b> |             |     | <b>732</b> |            |     | <b>712</b> | <b>100.0%</b> | <b>33.51 [9.15, 57.88]</b>            |

Heterogeneity: Tau<sup>2</sup> = 800.47; Chi<sup>2</sup> = 33.00, df = 7 (P < 0.0001); I<sup>2</sup> = 79%  
 Test for overall effect: Z = 2.70 (P = 0.007)

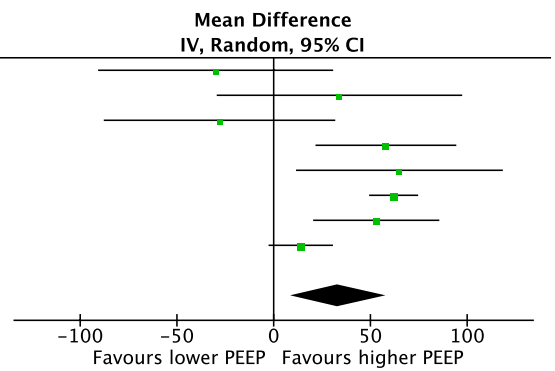

### Sensitivity analysis (timing of measurement)

#### PaO<sub>2</sub>/FiO<sub>2</sub> (korovesi\_d5-manzano\_d1-relax\_d1)

| Study or Subgroup | Higher PEEP |     |       | Lower PEEP |     |       | Weight | Mean Difference<br>IV, Random, 95% CI |
|-------------------|-------------|-----|-------|------------|-----|-------|--------|---------------------------------------|
|                   | Mean        | SD  | Total | Mean       | SD  | Total |        |                                       |
| Holland 2007      | 307         | 82  | 14    | 337        | 82  | 14    | 6.4%   | -30.00 [-90.75, 30.75]                |
| Korovesi 2011     | 441         | 97  | 15    | 407        | 71  | 12    | 6.0%   | 34.00 [-29.43, 97.43]                 |
| Koutsoukou 2006   | 409         | 65  | 11    | 437        | 74  | 10    | 6.5%   | -28.00 [-87.83, 31.83]                |
| Lago Borges 2013  | 328         | 85  | 45    | 270        | 90  | 44    | 12.5%  | 58.00 [21.61, 94.39]                  |
| Lesur 2010        | 293         | 135 | 30    | 228        | 67  | 33    | 7.7%   | 65.00 [11.56, 118.44]                 |
| Ma 2014           | 196         | 45  | 60    | 134        | 22  | 60    | 23.8%  | 62.00 [49.33, 74.67]                  |
| Manzano 2008      | 362         | 101 | 64    | 309        | 86  | 63    | 14.0%  | 53.00 [20.39, 85.61]                  |
| Relax 2020        | 272         | 126 | 493   | 226        | 101 | 476   | 23.0%  | 46.00 [31.65, 60.35]                  |

**Total (95% CI)**                                732                                712    **100.0%**    **43.35 [25.80, 60.91]**

Heterogeneity: Tau<sup>2</sup> = 295.15; Chi<sup>2</sup> = 17.57, df = 7 (P = 0.01); I<sup>2</sup> = 60%

Test for overall effect: Z = 4.84 (P < 0.00001)

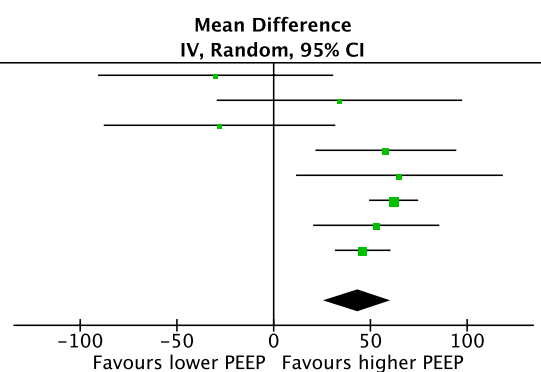

### Sensitivity analysis (timing of measurement)

#### PaO2/FiO2 (korovesi\_d5-manzano\_d1-relax\_d2)

| Study or Subgroup     | Higher PEEP |     |            | Lower PEEP |    |            | Weight        | Mean Difference<br>IV, Random, 95% CI |
|-----------------------|-------------|-----|------------|------------|----|------------|---------------|---------------------------------------|
|                       | Mean        | SD  | Total      | Mean       | SD | Total      |               |                                       |
| Holland 2007          | 307         | 82  | 14         | 337        | 82 | 14         | 6.5%          | -30.00 [-90.75, 30.75]                |
| Korovesi 2011         | 441         | 97  | 15         | 407        | 71 | 12         | 6.1%          | 34.00 [-29.43, 97.43]                 |
| Koutsoukou 2006       | 409         | 65  | 11         | 437        | 74 | 10         | 6.6%          | -28.00 [-87.83, 31.83]                |
| Lago Borges 2013      | 328         | 85  | 45         | 270        | 90 | 44         | 12.6%         | 58.00 [21.61, 94.39]                  |
| Lesur 2010            | 293         | 135 | 30         | 228        | 67 | 33         | 7.8%          | 65.00 [11.56, 118.44]                 |
| Ma 2014               | 196         | 45  | 60         | 134        | 22 | 60         | 23.3%         | 62.00 [49.33, 74.67]                  |
| Manzano 2008          | 362         | 101 | 64         | 309        | 86 | 63         | 14.0%         | 53.00 [20.39, 85.61]                  |
| Relax 2020            | 250         | 113 | 493        | 208        | 96 | 476        | 23.1%         | 42.00 [28.81, 55.19]                  |
| <b>Total (95% CI)</b> |             |     | <b>732</b> |            |    | <b>712</b> | <b>100.0%</b> | <b>42.22 [24.41, 60.02]</b>           |

Heterogeneity: Tau<sup>2</sup> = 311.99; Chi<sup>2</sup> = 18.81, df = 7 (P = 0.009); I<sup>2</sup> = 63%  
 Test for overall effect: Z = 4.65 (P < 0.00001)

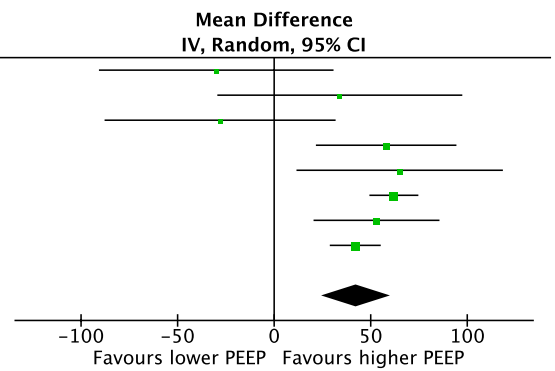



## Sensitivity analysis (timing of measurement)

### PaO<sub>2</sub>/FiO<sub>2</sub> (korovesi\_d1)

| Study or Subgroup     | Higher PEEP |     |            | Lower PEEP |    |            | Weight        | Mean Difference<br>IV, Random, 95% CI |
|-----------------------|-------------|-----|------------|------------|----|------------|---------------|---------------------------------------|
|                       | Mean        | SD  | Total      | Mean       | SD | Total      |               |                                       |
| Holland 2007          | 307         | 82  | 14         | 337        | 82 | 14         | 5.9%          | -30.00 [-90.75, 30.75]                |
| Korovesi 2011         | 481         | 90  | 15         | 442        | 79 | 12         | 5.5%          | 39.00 [-24.81, 102.81]                |
| Koutsoukou 2006       | 409         | 65  | 11         | 437        | 74 | 10         | 6.1%          | -28.00 [-87.83, 31.83]                |
| Lago Borges 2013      | 328         | 85  | 45         | 270        | 90 | 44         | 12.1%         | 58.00 [21.61, 94.39]                  |
| Lesur 2010            | 293         | 135 | 30         | 228        | 67 | 33         | 7.2%          | 65.00 [11.56, 118.44]                 |
| Ma 2014               | 196         | 45  | 60         | 134        | 22 | 60         | 24.8%         | 62.00 [49.33, 74.67]                  |
| Manzano 2008          | 359         | 104 | 64         | 301        | 84 | 63         | 13.5%         | 58.00 [25.15, 90.85]                  |
| Relax 2020            | 248         | 112 | 493        | 190        | 84 | 476        | 24.9%         | 58.00 [45.56, 70.44]                  |
| <b>Total (95% CI)</b> |             |     | <b>732</b> |            |    | <b>712</b> | <b>100.0%</b> | <b>48.05 [31.50, 64.60]</b>           |

Heterogeneity: Tau<sup>2</sup> = 245.50; Chi<sup>2</sup> = 16.63, df = 7 (P = 0.02); I<sup>2</sup> = 58%  
 Test for overall effect: Z = 5.69 (P < 0.00001)

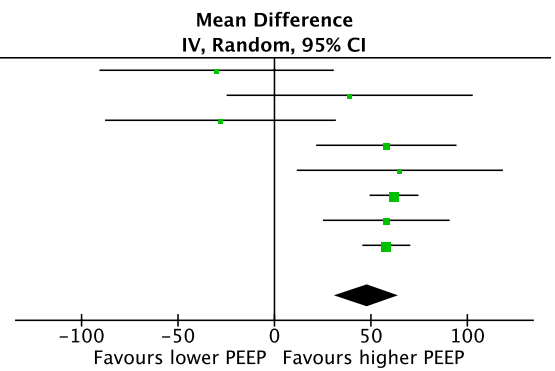

### Sensitivity analysis (timing of measurement)

#### PaO<sub>2</sub>/FiO<sub>2</sub> (korovesi\_d5)

| Study or Subgroup     | Higher PEEP |     |            | Lower PEEP |    |            | Weight        | Mean Difference<br>IV, Random, 95% CI |
|-----------------------|-------------|-----|------------|------------|----|------------|---------------|---------------------------------------|
|                       | Mean        | SD  | Total      | Mean       | SD | Total      |               |                                       |
| Holland 2007          | 307         | 82  | 14         | 337        | 82 | 14         | 6.0%          | -30.00 [-90.75, 30.75]                |
| Korovesi 2011         | 441         | 97  | 15         | 407        | 71 | 12         | 5.6%          | 34.00 [-29.43, 97.43]                 |
| Koutsoukou 2006       | 409         | 65  | 11         | 437        | 74 | 10         | 6.1%          | -28.00 [-87.83, 31.83]                |
| Lago Borges 2013      | 328         | 85  | 45         | 270        | 90 | 44         | 12.1%         | 58.00 [21.61, 94.39]                  |
| Lesur 2010            | 293         | 135 | 30         | 228        | 67 | 33         | 7.3%          | 65.00 [11.56, 118.44]                 |
| Ma 2014               | 196         | 45  | 60         | 134        | 22 | 60         | 24.7%         | 62.00 [49.33, 74.67]                  |
| Manzano 2008          | 359         | 104 | 64         | 301        | 84 | 63         | 13.6%         | 58.00 [25.15, 90.85]                  |
| Relax 2020            | 248         | 112 | 493        | 190        | 84 | 476        | 24.8%         | 58.00 [45.56, 70.44]                  |
| <b>Total (95% CI)</b> |             |     | <b>732</b> |            |    | <b>712</b> | <b>100.0%</b> | <b>47.68 [31.04, 64.32]</b>           |

Heterogeneity: Tau<sup>2</sup> = 250.32; Chi<sup>2</sup> = 16.82, df = 7 (P = 0.02); I<sup>2</sup> = 58%  
 Test for overall effect: Z = 5.62 (P < 0.00001)

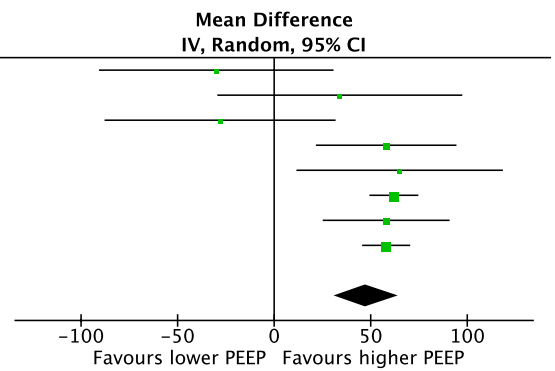

### Sensitivity analysis (timing of measurement)

#### PaO2/FiO2 (manzano\_basal)

| Study or Subgroup     | Higher PEEP |     |            | Lower PEEP |    |            | Weight        | Mean Difference<br>IV, Random, 95% CI |
|-----------------------|-------------|-----|------------|------------|----|------------|---------------|---------------------------------------|
|                       | Mean        | SD  | Total      | Mean       | SD | Total      |               |                                       |
| Holland 2007          | 307         | 82  | 14         | 337        | 82 | 14         | 6.9%          | -30.00 [-90.75, 30.75]                |
| Korovesi 2011         | 498         | 75  | 15         | 420        | 73 | 12         | 7.7%          | 78.00 [21.91, 134.09]                 |
| Koutsoukou 2006       | 409         | 65  | 11         | 437        | 74 | 10         | 7.0%          | -28.00 [-87.83, 31.83]                |
| Lago Borges 2013      | 328         | 85  | 45         | 270        | 90 | 44         | 12.7%         | 58.00 [21.61, 94.39]                  |
| Lesur 2010            | 293         | 135 | 30         | 228        | 67 | 33         | 8.2%          | 65.00 [11.56, 118.44]                 |
| Ma 2014               | 196         | 45  | 60         | 134        | 22 | 60         | 21.6%         | 62.00 [49.33, 74.67]                  |
| Manzano 2008          | 392         | 104 | 64         | 375        | 79 | 63         | 14.2%         | 17.00 [-15.09, 49.09]                 |
| Relax 2020            | 248         | 112 | 493        | 190        | 84 | 476        | 21.7%         | 58.00 [45.56, 70.44]                  |
| <b>Total (95% CI)</b> |             |     | <b>732</b> |            |    | <b>712</b> | <b>100.0%</b> | <b>43.04 [24.13, 61.95]</b>           |

Heterogeneity: Tau<sup>2</sup> = 389.19; Chi<sup>2</sup> = 22.49, df = 7 (P = 0.002); I<sup>2</sup> = 69%  
 Test for overall effect: Z = 4.46 (P < 0.00001)

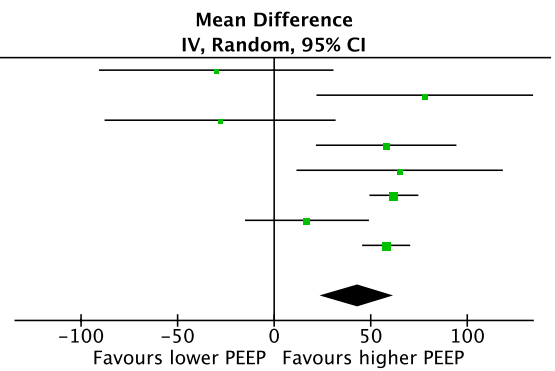

### Sensitivity analysis (timing of measurement)

#### PaO2/FiO2 (manzano\_6h)

| Study or Subgroup     | Higher PEEP |     |            | Lower PEEP |     |            | Weight        | Mean Difference<br>IV, Random, 95% CI |
|-----------------------|-------------|-----|------------|------------|-----|------------|---------------|---------------------------------------|
|                       | Mean        | SD  | Total      | Mean       | SD  | Total      |               |                                       |
| Holland 2007          | 307         | 82  | 14         | 337        | 82  | 14         | 6.6%          | -30.00 [-90.75, 30.75]                |
| Korovesi 2011         | 498         | 75  | 15         | 420        | 73  | 12         | 7.4%          | 78.00 [21.91, 134.09]                 |
| Koutsoukou 2006       | 409         | 65  | 11         | 437        | 74  | 10         | 6.8%          | -28.00 [-87.83, 31.83]                |
| Lago Borges 2013      | 328         | 85  | 45         | 270        | 90  | 44         | 12.6%         | 58.00 [21.61, 94.39]                  |
| Lesur 2010            | 293         | 135 | 30         | 228        | 67  | 33         | 8.0%          | 65.00 [11.56, 118.44]                 |
| Ma 2014               | 196         | 45  | 60         | 134        | 22  | 60         | 22.9%         | 62.00 [49.33, 74.67]                  |
| Manzano 2008          | 356         | 100 | 64         | 332        | 108 | 63         | 12.7%         | 24.00 [-12.21, 60.21]                 |
| Relax 2020            | 248         | 112 | 493        | 190        | 84  | 476        | 23.0%         | 58.00 [45.56, 70.44]                  |
| <b>Total (95% CI)</b> |             |     | <b>732</b> |            |     | <b>712</b> | <b>100.0%</b> | <b>44.98 [26.84, 63.12]</b>           |

Heterogeneity: Tau<sup>2</sup> = 332.89; Chi<sup>2</sup> = 19.92, df = 7 (P = 0.006); I<sup>2</sup> = 65%  
 Test for overall effect: Z = 4.86 (P < 0.00001)

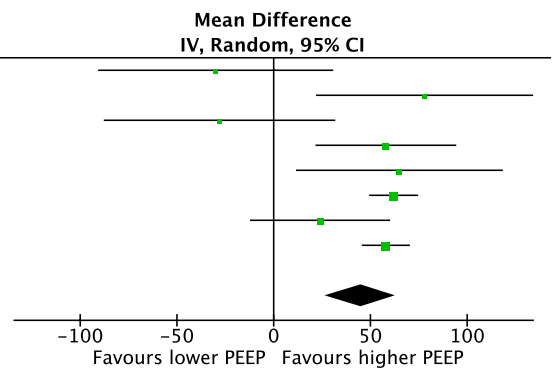

**Sensitivity analysis (timing of measurement)**

**PaO2/FiO2 (manzano\_d1)**

| Study or Subgroup     | Higher PEEP |     |            | Lower PEEP |    |            | Weight        | Mean Difference<br>IV, Random, 95% CI |
|-----------------------|-------------|-----|------------|------------|----|------------|---------------|---------------------------------------|
|                       | Mean        | SD  | Total      | Mean       | SD | Total      |               |                                       |
| Holland 2007          | 307         | 82  | 14         | 337        | 82 | 14         | 5.9%          | -30.00 [-90.75, 30.75]                |
| Korovesi 2011         | 498         | 75  | 15         | 420        | 73 | 12         | 6.7%          | 78.00 [21.91, 134.09]                 |
| Koutsoukou 2006       | 409         | 65  | 11         | 437        | 74 | 10         | 6.0%          | -28.00 [-87.83, 31.83]                |
| Lago Borges 2013      | 328         | 85  | 45         | 270        | 90 | 44         | 12.0%         | 58.00 [21.61, 94.39]                  |
| Lesur 2010            | 293         | 135 | 30         | 228        | 67 | 33         | 7.2%          | 65.00 [11.56, 118.44]                 |
| Ma 2014               | 196         | 45  | 60         | 134        | 22 | 60         | 24.3%         | 62.00 [49.33, 74.67]                  |
| Manzano 2008          | 362         | 101 | 64         | 309        | 86 | 63         | 13.5%         | 53.00 [20.39, 85.61]                  |
| Relax 2020            | 248         | 112 | 493        | 190        | 84 | 476        | 24.5%         | 58.00 [45.56, 70.44]                  |
| <b>Total (95% CI)</b> |             |     | <b>732</b> |            |    | <b>712</b> | <b>100.0%</b> | <b>49.78 [33.24, 66.32]</b>           |

Heterogeneity: Tau<sup>2</sup> = 250.60; Chi<sup>2</sup> = 16.94, df = 7 (P = 0.02); I<sup>2</sup> = 59%  
 Test for overall effect: Z = 5.90 (P < 0.00001)

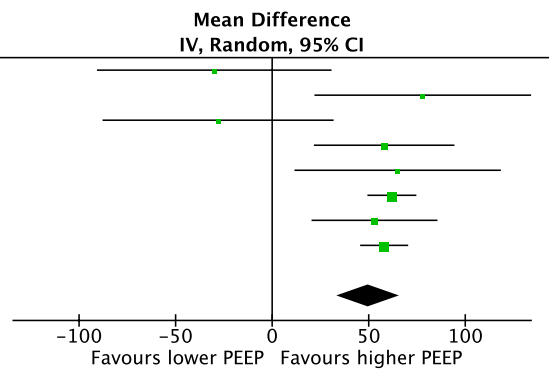

### Sensitivity analysis (timing of measurement)

#### PaO2/FiO2 (relax\_ afterrand)

| Study or Subgroup     | Higher PEEP |     |            | Lower PEEP |     |            | Weight        | Mean Difference<br>IV, Random, 95% CI |
|-----------------------|-------------|-----|------------|------------|-----|------------|---------------|---------------------------------------|
|                       | Mean        | SD  | Total      | Mean       | SD  | Total      |               |                                       |
| Holland 2007          | 307         | 82  | 14         | 337        | 82  | 14         | 8.8%          | -30.00 [-90.75, 30.75]                |
| Korovesi 2011         | 498         | 75  | 15         | 420        | 73  | 12         | 9.6%          | 78.00 [21.91, 134.09]                 |
| Koutsoukou 2006       | 409         | 65  | 11         | 437        | 74  | 10         | 8.9%          | -28.00 [-87.83, 31.83]                |
| Lago Borges 2013      | 328         | 85  | 45         | 270        | 90  | 44         | 13.4%         | 58.00 [21.61, 94.39]                  |
| Lesur 2010            | 293         | 135 | 30         | 228        | 67  | 33         | 10.0%         | 65.00 [11.56, 118.44]                 |
| Ma 2014               | 196         | 45  | 60         | 134        | 22  | 60         | 17.9%         | 62.00 [49.33, 74.67]                  |
| Manzano 2008          | 359         | 104 | 64         | 301        | 84  | 63         | 14.1%         | 58.00 [25.15, 90.85]                  |
| Relax 2020            | 230         | 140 | 493        | 216        | 124 | 476        | 17.3%         | 14.00 [-2.64, 30.64]                  |
| <b>Total (95% CI)</b> |             |     | <b>732</b> |            |     | <b>712</b> | <b>100.0%</b> | <b>38.26 [13.53, 62.99]</b>           |

Heterogeneity:  $\tau^2 = 847.41$ ;  $\text{Chi}^2 = 34.77$ ,  $\text{df} = 7$  ( $P < 0.0001$ );  $I^2 = 80\%$   
 Test for overall effect:  $Z = 3.03$  ( $P = 0.002$ )

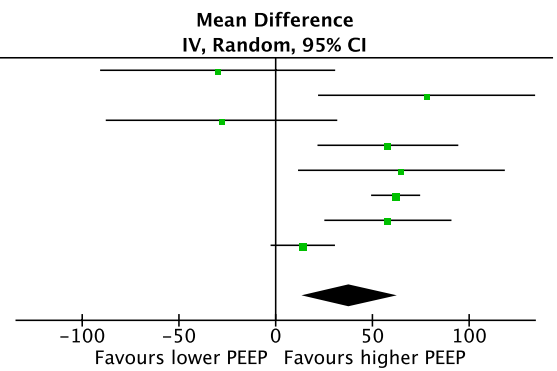

### Sensitivity analysis (timing of measurement)

#### PaO2/FiO2 (relax\_d1)

| Study or Subgroup | Higher PEEP |     |       | Lower PEEP |     |       | Weight | Mean Difference<br>IV, Random, 95% CI |
|-------------------|-------------|-----|-------|------------|-----|-------|--------|---------------------------------------|
|                   | Mean        | SD  | Total | Mean       | SD  | Total |        |                                       |
| Holland 2007      | 307         | 82  | 14    | 337        | 82  | 14    | 6.4%   | -30.00 [-90.75, 30.75]                |
| Korovesi 2011     | 498         | 75  | 15    | 420        | 73  | 12    | 7.2%   | 78.00 [21.91, 134.09]                 |
| Koutsoukou 2006   | 409         | 65  | 11    | 437        | 74  | 10    | 6.6%   | -28.00 [-87.83, 31.83]                |
| Lago Borges 2013  | 328         | 85  | 45    | 270        | 90  | 44    | 12.5%  | 58.00 [21.61, 94.39]                  |
| Lesur 2010        | 293         | 135 | 30    | 228        | 67  | 33    | 7.8%   | 65.00 [11.56, 118.44]                 |
| Ma 2014           | 196         | 45  | 60    | 134        | 22  | 60    | 23.2%  | 62.00 [49.33, 74.67]                  |
| Manzano 2008      | 359         | 104 | 64    | 301        | 84  | 63    | 13.8%  | 58.00 [25.15, 90.85]                  |
| Relax 2020        | 272         | 126 | 493   | 226        | 101 | 476   | 22.5%  | 46.00 [31.65, 60.35]                  |

**Total (95% CI)** 732 712 100.0% **46.91 [29.19, 64.62]**

Heterogeneity:  $\tau^2 = 309.89$ ;  $\chi^2 = 18.18$ ,  $df = 7$  ( $P = 0.01$ );  $I^2 = 61\%$

Test for overall effect:  $Z = 5.19$  ( $P < 0.00001$ )

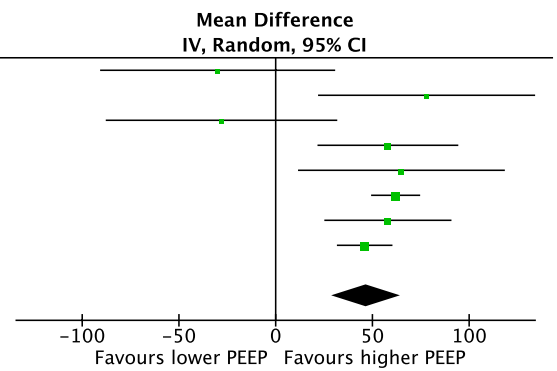

### Sensitivity analysis (timing of measurement)

#### PaO2/FiO2 (relax\_d2)

| Study or Subgroup     | Higher PEEP |     |            | Lower PEEP |    |                   | Weight | Mean Difference<br>IV, Random, 95% CI |
|-----------------------|-------------|-----|------------|------------|----|-------------------|--------|---------------------------------------|
|                       | Mean        | SD  | Total      | Mean       | SD | Total             |        |                                       |
| Holland 2007          | 307         | 82  | 14         | 337        | 82 | 14                | 6.6%   | -30.00 [-90.75, 30.75]                |
| Korovesi 2011         | 498         | 75  | 15         | 420        | 73 | 12                | 7.4%   | 78.00 [21.91, 134.09]                 |
| Koutsoukou 2006       | 409         | 65  | 11         | 437        | 74 | 10                | 6.7%   | -28.00 [-87.83, 31.83]                |
| Lago Borges 2013      | 328         | 85  | 45         | 270        | 90 | 44                | 12.5%  | 58.00 [21.61, 94.39]                  |
| Lesur 2010            | 293         | 135 | 30         | 228        | 67 | 33                | 7.9%   | 65.00 [11.56, 118.44]                 |
| Ma 2014               | 196         | 45  | 60         | 134        | 22 | 60                | 22.7%  | 62.00 [49.33, 74.67]                  |
| Manzano 2008          | 359         | 104 | 64         | 301        | 84 | 63                | 13.8%  | 58.00 [25.15, 90.85]                  |
| Relax 2020            | 250         | 113 | 493        | 208        | 96 | 476               | 22.5%  | 42.00 [28.81, 55.19]                  |
| <b>Total (95% CI)</b> |             |     | <b>732</b> |            |    | <b>712 100.0%</b> |        | <b>45.79 [27.74, 63.85]</b>           |

Heterogeneity: Tau<sup>2</sup> = 332.54; Chi<sup>2</sup> = 19.68, df = 7 (P = 0.006); I<sup>2</sup> = 64%  
 Test for overall effect: Z = 4.97 (P < 0.00001)

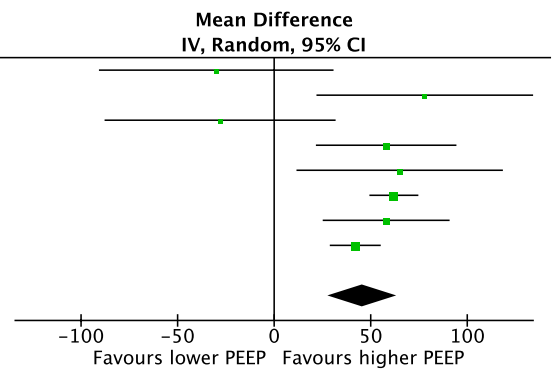



## Sensitivity analysis (odds ratio)

### Hospital mortality

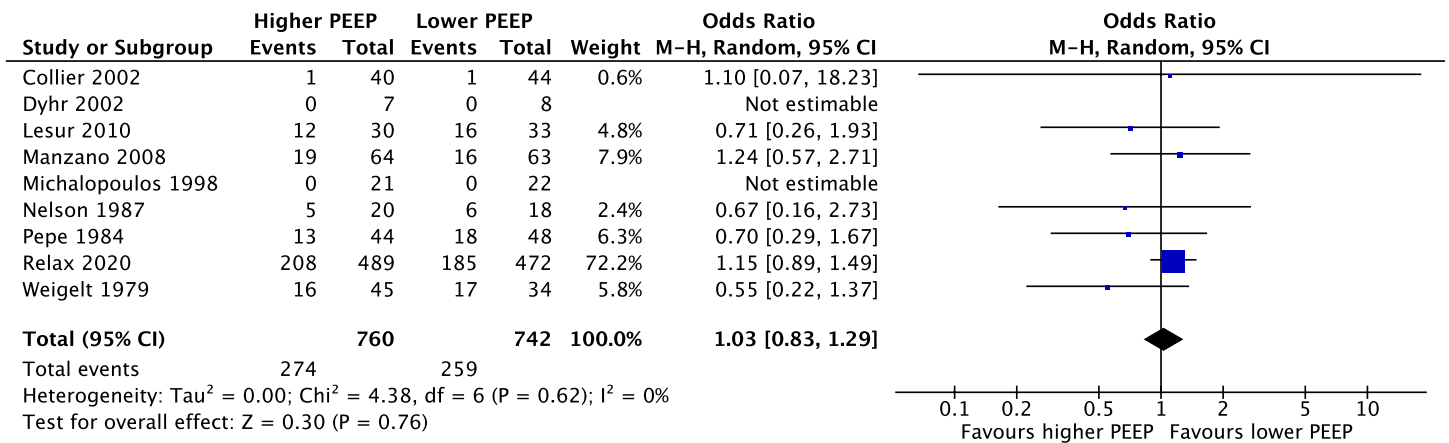

## Sensitivity analysis (odds ratio)

### Hypoxemia

| Study or Subgroup                                                                          | Higher PEEP |            | Lower PEEP |            | Weight        | Odds Ratio<br>M-H, Random, 95% CI |
|--------------------------------------------------------------------------------------------|-------------|------------|------------|------------|---------------|-----------------------------------|
|                                                                                            | Events      | Total      | Events     | Total      |               |                                   |
| Lago Borges 2013                                                                           | 19          | 45         | 30         | 44         | 23.9%         | 0.34 [0.14, 0.81]                 |
| Manzano 2008                                                                               | 12          | 64         | 34         | 63         | 25.0%         | 0.20 [0.09, 0.44]                 |
| Michalopoulos 1998                                                                         | 2           | 21         | 2          | 22         | 10.0%         | 1.05 [0.13, 8.24]                 |
| Pepe 1984                                                                                  | 1           | 44         | 4          | 48         | 8.9%          | 0.26 [0.03, 2.38]                 |
| Relax 2020                                                                                 | 87          | 493        | 98         | 476        | 32.2%         | 0.83 [0.60, 1.14]                 |
| <b>Total (95% CI)</b>                                                                      |             | <b>667</b> |            | <b>653</b> | <b>100.0%</b> | <b>0.43 [0.20, 0.94]</b>          |
| Total events                                                                               | 121         |            | 168        |            |               |                                   |
| Heterogeneity: $\tau^2 = 0.46$ ; $\chi^2 = 13.68$ , $df = 4$ ( $P = 0.008$ ); $I^2 = 71\%$ |             |            |            |            |               |                                   |
| Test for overall effect: $Z = 2.13$ ( $P = 0.03$ )                                         |             |            |            |            |               |                                   |

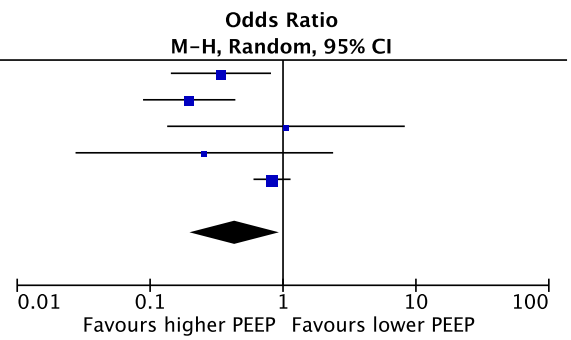

## Sensitivity analysis (odds ratio)

### Atelectasis

| Study or Subgroup                                                                                    | Higher PEEP |            | Lower PEEP |            | Weight        | Odds Ratio<br>M-H, Random, 95% CI |
|------------------------------------------------------------------------------------------------------|-------------|------------|------------|------------|---------------|-----------------------------------|
|                                                                                                      | Events      | Total      | Events     | Total      |               |                                   |
| Good 1979                                                                                            | 9           | 10         | 12         | 14         | 2.8%          | 1.50 [0.12, 19.24]                |
| Manzano 2008                                                                                         | 12          | 64         | 17         | 63         | 26.3%         | 0.62 [0.27, 1.44]                 |
| Michalopoulos 1998                                                                                   | 2           | 21         | 2          | 22         | 4.4%          | 1.05 [0.13, 8.24]                 |
| Pepe 1984                                                                                            | 27          | 44         | 23         | 48         | 26.8%         | 1.73 [0.75, 3.96]                 |
| Relax 2020                                                                                           | 15          | 493        | 20         | 476        | 39.7%         | 0.72 [0.36, 1.41]                 |
| <b>Total (95% CI)</b>                                                                                |             | <b>632</b> |            | <b>623</b> | <b>100.0%</b> | <b>0.91 [0.59, 1.40]</b>          |
| Total events                                                                                         | 65          |            | 74         |            |               |                                   |
| Heterogeneity: $\tau^2 = 0.00$ ; $\text{Chi}^2 = 3.71$ , $\text{df} = 4$ ( $P = 0.45$ ); $I^2 = 0\%$ |             |            |            |            |               |                                   |
| Test for overall effect: $Z = 0.44$ ( $P = 0.66$ )                                                   |             |            |            |            |               |                                   |

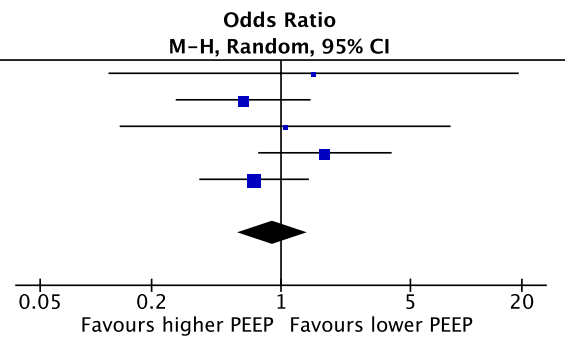

## Sensitivity analysis (odds ratio)

### Barotrauma

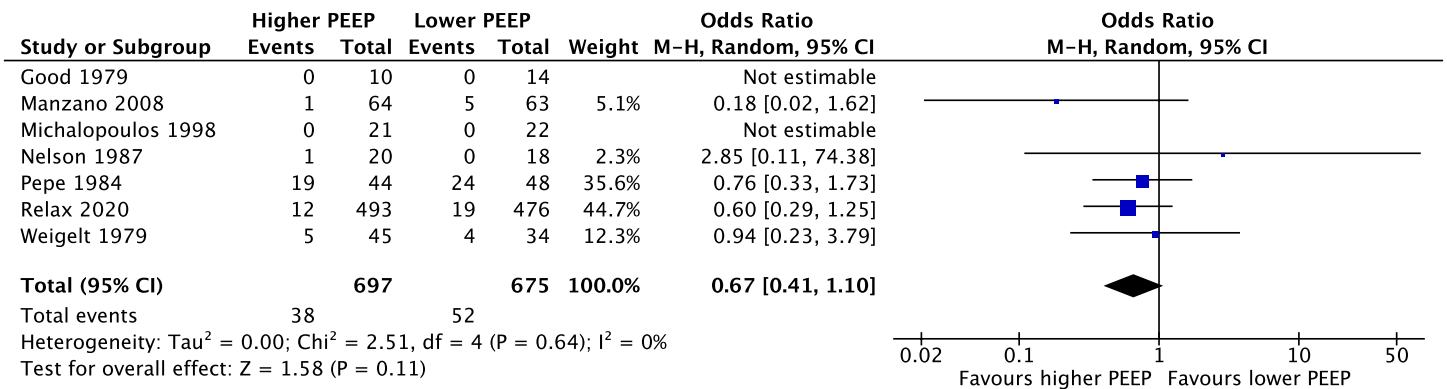

### Sensitivity analysis (odds ratio)

### Ventilator-associated pneumonia

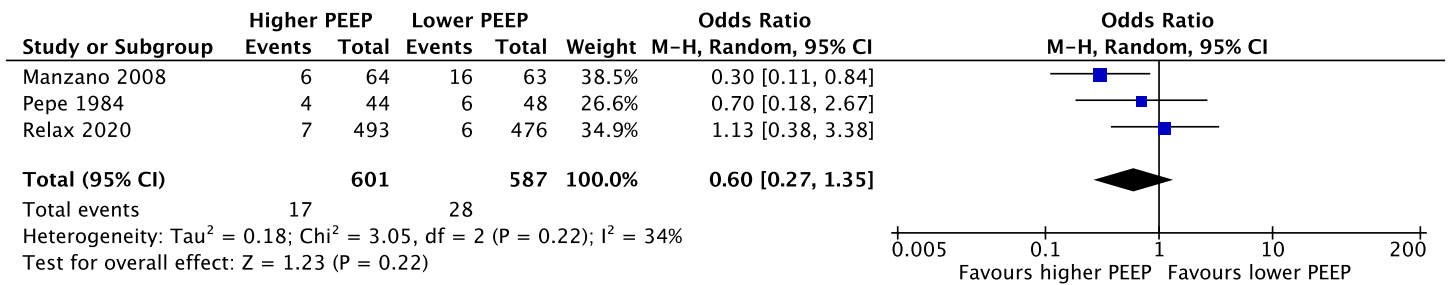

## Sensitivity analysis (odds ratio)

### ARDS

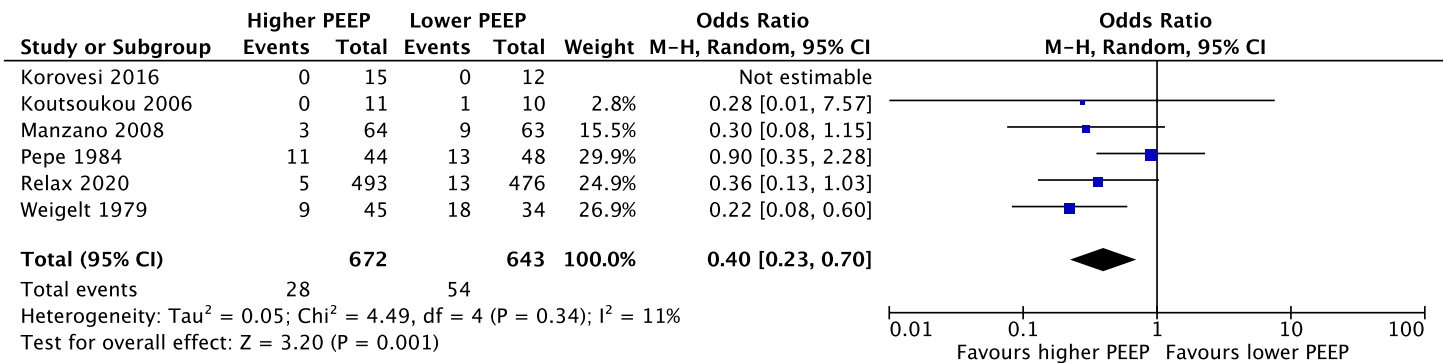

## Sensitivity analysis (odds ratio)

### Hypotension

| Study or Subgroup                                                                       | Higher PEEP |            | Lower PEEP |            | Weight        | Odds Ratio<br>M-H, Random, 95% CI |
|-----------------------------------------------------------------------------------------|-------------|------------|------------|------------|---------------|-----------------------------------|
|                                                                                         | Events      | Total      | Events     | Total      |               |                                   |
| Feeley 1975                                                                             | 0           | 12         | 0          | 13         |               | Not estimable                     |
| Good 1979                                                                               | 0           | 10         | 0          | 14         |               | Not estimable                     |
| Lesur 2010                                                                              | 16          | 30         | 16         | 33         | 84.2%         | 1.21 [0.45, 3.27]                 |
| Pepe 1984                                                                               | 1           | 44         | 0          | 48         | 7.9%          | 3.34 [0.13, 84.28]                |
| Weigelt 1979                                                                            | 1           | 45         | 0          | 34         | 7.9%          | 2.33 [0.09, 58.88]                |
| <b>Total (95% CI)</b>                                                                   |             | <b>141</b> |            | <b>142</b> | <b>100.0%</b> | <b>1.39 [0.56, 3.44]</b>          |
| Total events                                                                            | 18          |            | 16         |            |               |                                   |
| Heterogeneity: $\tau^2 = 0.00$ ; $\chi^2 = 0.46$ , $df = 2$ ( $P = 0.80$ ); $I^2 = 0\%$ |             |            |            |            |               |                                   |
| Test for overall effect: $Z = 0.70$ ( $P = 0.48$ )                                      |             |            |            |            |               |                                   |

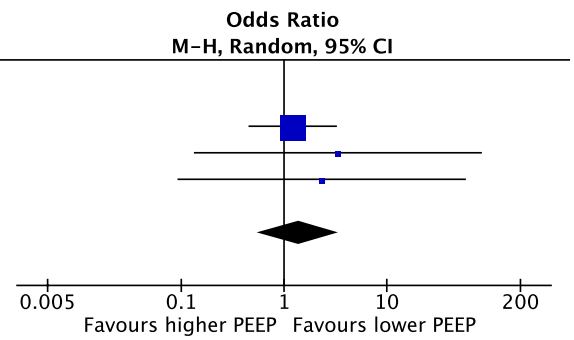

## Sensitivity analysis (odds ratio)

### ICU mortality

| Study or Subgroup                                                                                       | Higher PEEP |            | Lower PEEP |            | Weight        | Odds Ratio<br>M-H, Random, 95% CI |
|---------------------------------------------------------------------------------------------------------|-------------|------------|------------|------------|---------------|-----------------------------------|
|                                                                                                         | Events      | Total      | Events     | Total      |               |                                   |
| Dyhr 2002                                                                                               | 0           | 7          | 0          | 8          |               | Not estimable                     |
| Feeley 1975                                                                                             | 2           | 12         | 1          | 13         | 1.0%          | 2.40 [0.19, 30.52]                |
| Korovesi 2011                                                                                           | 3           | 15         | 4          | 12         | 2.1%          | 0.50 [0.09, 2.86]                 |
| Nelson 1987                                                                                             | 4           | 20         | 4          | 18         | 2.7%          | 0.88 [0.18, 4.17]                 |
| Relax 2020                                                                                              | 185         | 492        | 163        | 476        | 94.2%         | 1.16 [0.89, 1.51]                 |
| <b>Total (95% CI)</b>                                                                                   |             | <b>546</b> |            | <b>527</b> | <b>100.0%</b> | <b>1.14 [0.88, 1.47]</b>          |
| Total events                                                                                            | 194         |            | 172        |            |               |                                   |
| Heterogeneity: Tau <sup>2</sup> = 0.00; Chi <sup>2</sup> = 1.31, df = 3 (P = 0.73); I <sup>2</sup> = 0% |             |            |            |            |               |                                   |
| Test for overall effect: Z = 0.98 (P = 0.33)                                                            |             |            |            |            |               |                                   |

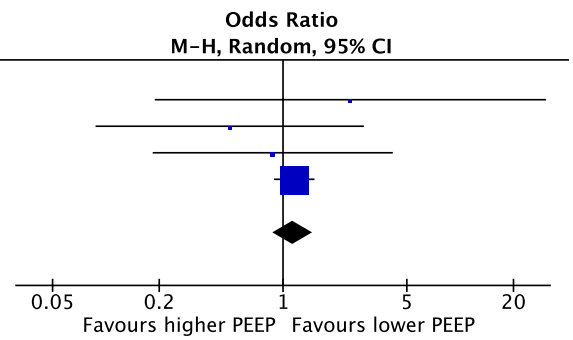



## Sensitivity analysis (odds ratio)

### 28-day mortality

| Study or Subgroup                                                                                           | Higher PEEP |            | Lower PEEP |            | Weight        | Odds Ratio               |
|-------------------------------------------------------------------------------------------------------------|-------------|------------|------------|------------|---------------|--------------------------|
|                                                                                                             | Events      | Total      | Events     | Total      |               | M-H, Random, 95% CI      |
| Lesur 2010                                                                                                  | 9           | 30         | 14         | 33         | 29.9%         | 0.58 [0.21, 1.65]        |
| Ma 2014                                                                                                     | 15          | 60         | 39         | 60         | 32.8%         | 0.18 [0.08, 0.40]        |
| Relax 2020                                                                                                  | 207         | 493        | 183        | 476        | 37.3%         | 1.16 [0.90, 1.50]        |
| <b>Total (95% CI)</b>                                                                                       |             | <b>583</b> |            | <b>569</b> | <b>100.0%</b> | <b>0.51 [0.15, 1.77]</b> |
| Total events                                                                                                | 231         |            | 236        |            |               |                          |
| Heterogeneity: Tau <sup>2</sup> = 1.06; Chi <sup>2</sup> = 20.29, df = 2 (P < 0.0001); I <sup>2</sup> = 90% |             |            |            |            |               |                          |
| Test for overall effect: Z = 1.06 (P = 0.29)                                                                |             |            |            |            |               |                          |

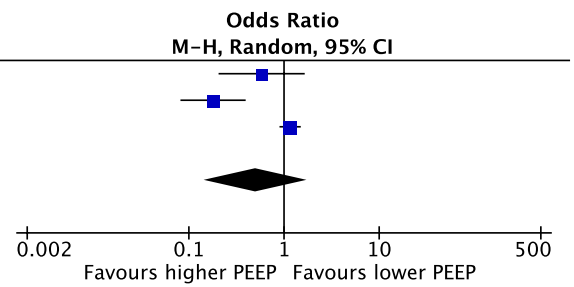

## Sensitivity analysis (without high-risk studies)

### Hospital mortality

| Study or Subgroup                                                                                       | Higher PEEP |            | Lower PEEP |            | Weight        | Risk Ratio<br>M-H, Random, 95% CI |
|---------------------------------------------------------------------------------------------------------|-------------|------------|------------|------------|---------------|-----------------------------------|
|                                                                                                         | Events      | Total      | Events     | Total      |               |                                   |
| Collier 2002                                                                                            | 1           | 40         | 1          | 44         | 0.3%          | 1.10 [0.07, 17.01]                |
| Lesur 2010                                                                                              | 12          | 30         | 16         | 33         | 6.4%          | 0.82 [0.47, 1.45]                 |
| Manzano 2008                                                                                            | 19          | 64         | 16         | 63         | 6.3%          | 1.17 [0.66, 2.06]                 |
| Relax 2020                                                                                              | 208         | 489        | 185        | 472        | 87.0%         | 1.09 [0.93, 1.26]                 |
| <b>Total (95% CI)</b>                                                                                   |             | <b>623</b> |            | <b>612</b> | <b>100.0%</b> | <b>1.07 [0.93, 1.24]</b>          |
| Total events                                                                                            | 240         |            | 218        |            |               |                                   |
| Heterogeneity: Tau <sup>2</sup> = 0.00; Chi <sup>2</sup> = 0.95, df = 3 (P = 0.81); I <sup>2</sup> = 0% |             |            |            |            |               |                                   |
| Test for overall effect: Z = 0.95 (P = 0.34)                                                            |             |            |            |            |               |                                   |

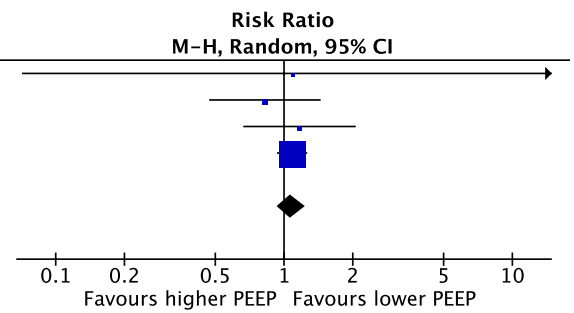

### Sensitivity analysis (without high-risk studies)

#### PaO<sub>2</sub>/FiO<sub>2</sub>

| Study or Subgroup     | Higher PEEP |     |            | Lower PEEP |    |            | Weight        | Mean Difference<br>IV, Random, 95% CI |
|-----------------------|-------------|-----|------------|------------|----|------------|---------------|---------------------------------------|
|                       | Mean        | SD  | Total      | Mean       | SD | Total      |               |                                       |
| Holland 2007          | 307         | 82  | 14         | 337        | 82 | 14         | 5.0%          | -30.00 [-90.75, 30.75]                |
| Korovesi 2011         | 498         | 75  | 15         | 420        | 73 | 12         | 5.8%          | 78.00 [21.91, 134.09]                 |
| Lesur 2010            | 293         | 135 | 30         | 228        | 67 | 33         | 6.3%          | 65.00 [11.56, 118.44]                 |
| Ma 2014               | 196         | 45  | 60         | 134        | 22 | 60         | 34.4%         | 62.00 [49.33, 74.67]                  |
| Manzano 2008          | 359         | 104 | 64         | 301        | 84 | 63         | 13.7%         | 58.00 [25.15, 90.85]                  |
| Relax 2020            | 248         | 112 | 493        | 190        | 84 | 476        | 34.8%         | 58.00 [45.56, 70.44]                  |
| <b>Total (95% CI)</b> |             |     | <b>676</b> |            |    | <b>658</b> | <b>100.0%</b> | <b>56.55 [42.12, 70.98]</b>           |

Heterogeneity: Tau<sup>2</sup> = 115.66; Chi<sup>2</sup> = 8.97, df = 5 (P = 0.11); I<sup>2</sup> = 44%  
 Test for overall effect: Z = 7.68 (P < 0.00001)

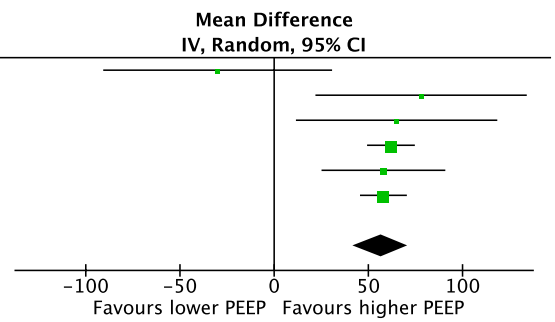

### Sensitivity analysis (without high-risk studies)

#### Hypoxemia

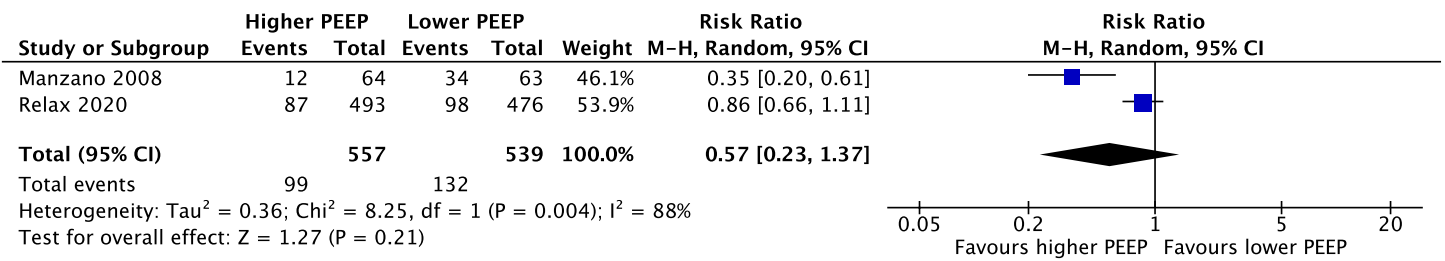

### Sensitivity analysis (without high-risk studies)

#### Atelectasis

| Study or Subgroup                                                                                       | Higher PEEP |            | Lower PEEP |            | Weight        | Risk Ratio          |                     |
|---------------------------------------------------------------------------------------------------------|-------------|------------|------------|------------|---------------|---------------------|---------------------|
|                                                                                                         | Events      | Total      | Events     | Total      |               | M-H, Random, 95% CI | M-H, Random, 95% CI |
| Manzano 2008                                                                                            | 12          | 64         | 17         | 63         | 50.4%         | 0.69                | [0.36, 1.33]        |
| Relax 2020                                                                                              | 15          | 493        | 20         | 476        | 49.6%         | 0.72                | [0.38, 1.40]        |
| <b>Total (95% CI)</b>                                                                                   |             | <b>557</b> |            | <b>539</b> | <b>100.0%</b> | <b>0.71</b>         | <b>[0.45, 1.13]</b> |
| Total events                                                                                            | 27          |            | 37         |            |               |                     |                     |
| Heterogeneity: Tau <sup>2</sup> = 0.00; Chi <sup>2</sup> = 0.01, df = 1 (P = 0.93); I <sup>2</sup> = 0% |             |            |            |            |               |                     |                     |
| Test for overall effect: Z = 1.45 (P = 0.15)                                                            |             |            |            |            |               |                     |                     |

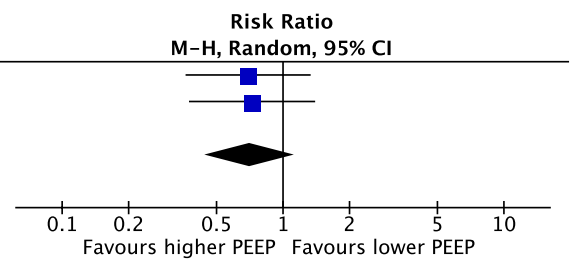

### Sensitivity analysis (without high-risk studies)

#### Barotrauma

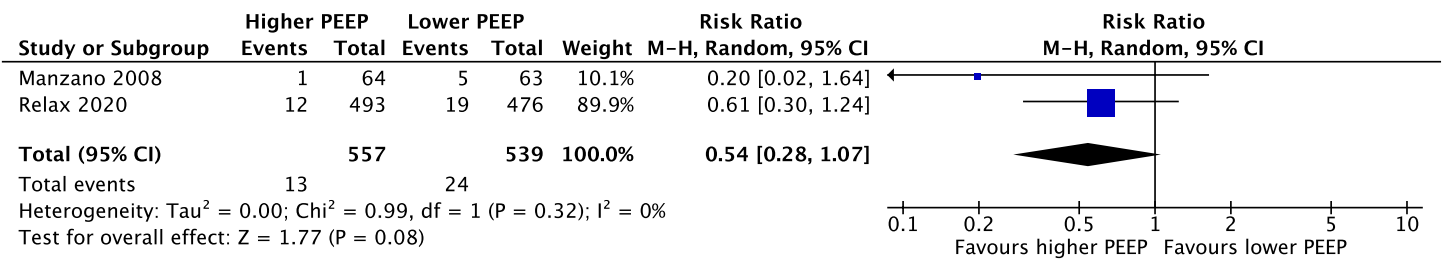

**Sensitivity analysis (without high-risk studies)**

**Ventilator-associated pneumonia**

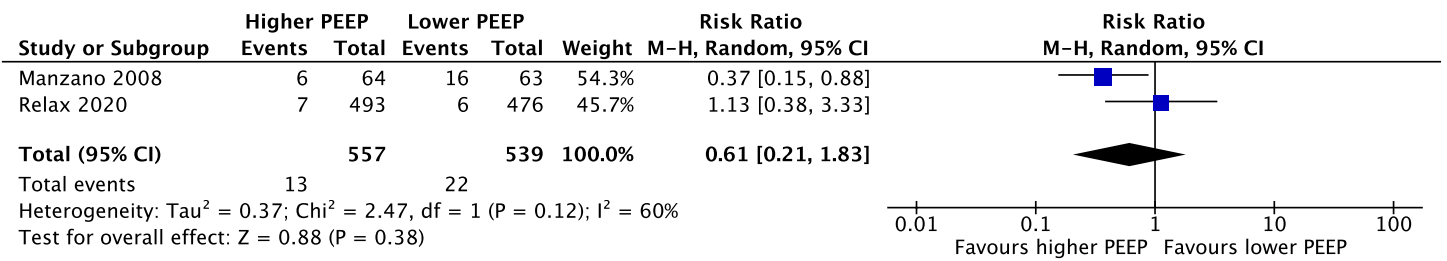

### Sensitivity analysis (without high-risk studies)

#### ARDS

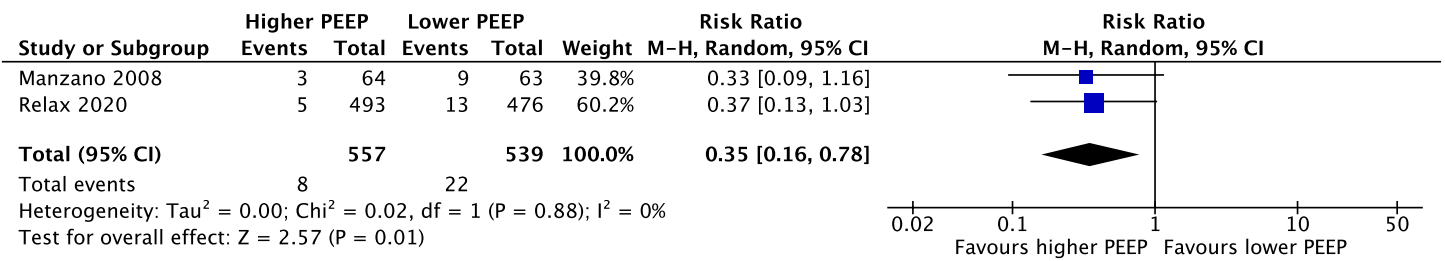



### Sensitivity analysis (without high-risk studies)

#### Cardiac index

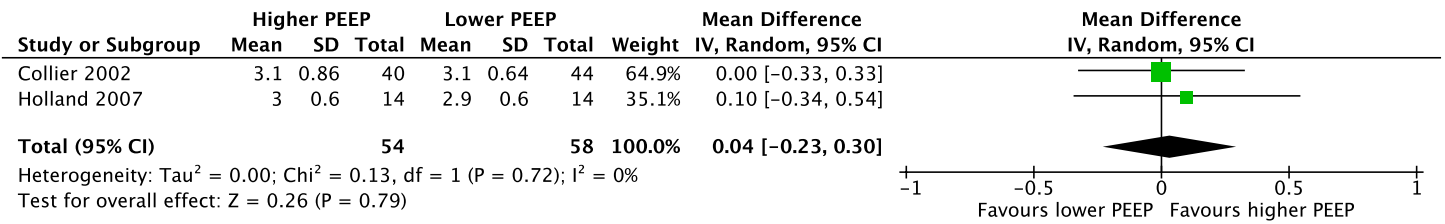

## Sensitivity analysis (without high-risk studies)

### Central venous pressure

| Study or Subgroup     | Higher PEEP |     |           | Lower PEEP |     |           | Weight        | Mean Difference<br>IV, Random, 95% CI |
|-----------------------|-------------|-----|-----------|------------|-----|-----------|---------------|---------------------------------------|
|                       | Mean        | SD  | Total     | Mean       | SD  | Total     |               |                                       |
| Holland 2007          | 9           | 3   | 14        | 9          | 3   | 14        | 33.5%         | 0.00 [-2.22, 2.22]                    |
| Lesur 2010            | 12.5        | 1.5 | 30        | 10.8       | 2.9 | 33        | 66.5%         | 1.70 [0.57, 2.83]                     |
| <b>Total (95% CI)</b> |             |     | <b>44</b> |            |     | <b>47</b> | <b>100.0%</b> | <b>1.13 [-0.44, 2.70]</b>             |

Heterogeneity:  $\tau^2 = 0.64$ ;  $\text{Chi}^2 = 1.79$ ,  $\text{df} = 1$  ( $P = 0.18$ );  $I^2 = 44\%$   
 Test for overall effect:  $Z = 1.41$  ( $P = 0.16$ )

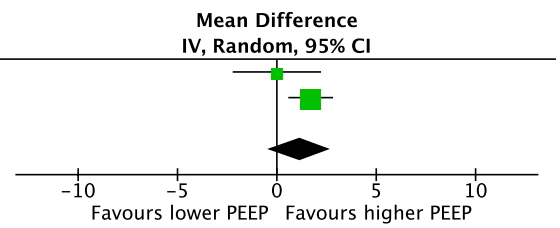

## Sensitivity analysis (without high-risk studies)

### Duration of ventilation

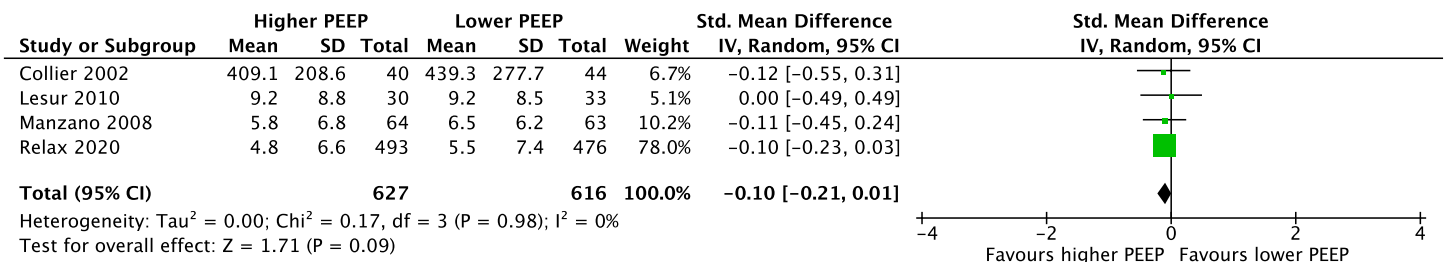

## Sensitivity analysis (without high-risk studies)

### ICU stay

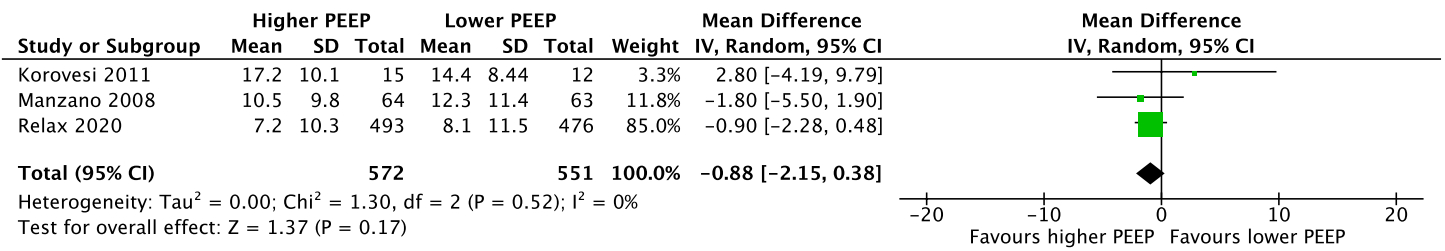

## Sensitivity analysis (without high-risk studies)

### Hospital stay

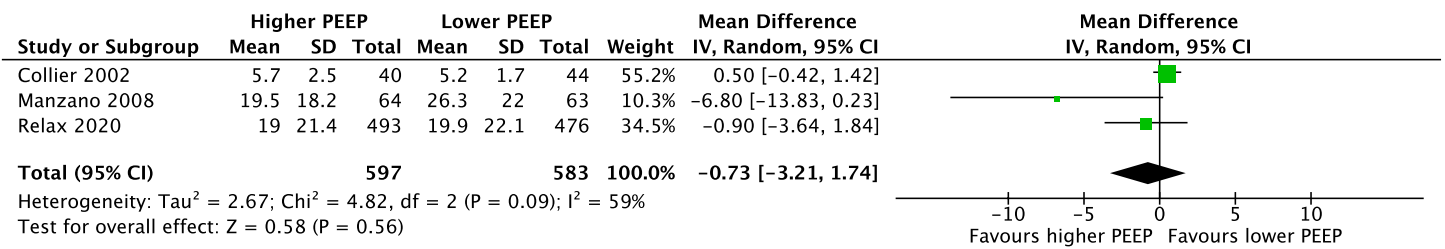

### Sensitivity analysis (without high-risk studies)

#### ICU mortality

| Study or Subgroup                                                                                       | Higher PEEP |            | Lower PEEP |            | Weight        | Risk Ratio               |
|---------------------------------------------------------------------------------------------------------|-------------|------------|------------|------------|---------------|--------------------------|
|                                                                                                         | Events      | Total      | Events     | Total      |               | M-H, Random, 95% CI      |
| Korovesi 2011                                                                                           | 3           | 15         | 4          | 12         | 1.7%          | 0.60 [0.17, 2.18]        |
| Relax 2020                                                                                              | 185         | 492        | 163        | 476        | 98.3%         | 1.10 [0.93, 1.30]        |
| <b>Total (95% CI)</b>                                                                                   |             | <b>507</b> |            | <b>488</b> | <b>100.0%</b> | <b>1.09 [0.92, 1.28]</b> |
| Total events                                                                                            | 188         |            | 167        |            |               |                          |
| Heterogeneity: Tau <sup>2</sup> = 0.00; Chi <sup>2</sup> = 0.83, df = 1 (P = 0.36); I <sup>2</sup> = 0% |             |            |            |            |               |                          |
| Test for overall effect: Z = 0.98 (P = 0.33)                                                            |             |            |            |            |               |                          |

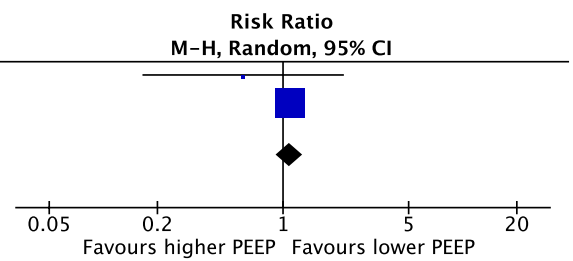

## Sensitivity analysis (without high-risk studies)

### 28-day mortality

| Study or Subgroup                                                                                           | Higher PEEP |            | Lower PEEP |            | Weight        | Risk Ratio               |
|-------------------------------------------------------------------------------------------------------------|-------------|------------|------------|------------|---------------|--------------------------|
|                                                                                                             | Events      | Total      | Events     | Total      |               | M-H, Random, 95% CI      |
| Lesur 2010                                                                                                  | 9           | 30         | 14         | 33         | 28.8%         | 0.71 [0.36, 1.39]        |
| Ma 2014                                                                                                     | 15          | 60         | 39         | 60         | 33.1%         | 0.38 [0.24, 0.62]        |
| Relax 2020                                                                                                  | 207         | 493        | 183        | 476        | 38.1%         | 1.09 [0.94, 1.27]        |
| <b>Total (95% CI)</b>                                                                                       |             | <b>583</b> |            | <b>569</b> | <b>100.0%</b> | <b>0.68 [0.33, 1.40]</b> |
| Total events                                                                                                | 231         |            | 236        |            |               |                          |
| Heterogeneity: Tau <sup>2</sup> = 0.35; Chi <sup>2</sup> = 17.71, df = 2 (P = 0.0001); I <sup>2</sup> = 89% |             |            |            |            |               |                          |
| Test for overall effect: Z = 1.05 (P = 0.30)                                                                |             |            |            |            |               |                          |

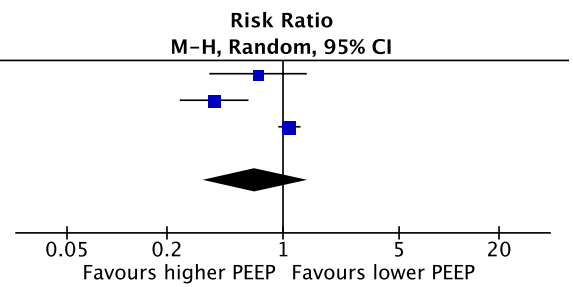

## Online Resource 9. Subgroup Analyses

### Subgroup analyses: medical vs. surgical patients

Subgroup analyses according to the inclusion of medical or surgical patients in the studies. No subgroup difference was observed.

Abbreviations: M-H, Mantel–Haenszel; CI, confidence interval; PaO<sub>2</sub>/FiO<sub>2</sub>, arterial partial pressure of oxygen to fraction of inspired oxygen ratio; IV, inverse variance; A-aDO<sub>2</sub>, alveolar-arterial oxygen pressure difference; CVP, central venous pressure; PRBC, packed red blood cell; ICU, intensive care unit.

| Outcome or Subgroup                    | Studies | Participants | Statistical Method                        | Effect Estimate        |
|----------------------------------------|---------|--------------|-------------------------------------------|------------------------|
| 1.1 Hospital mortality                 | 9       | 1502         | Risk Ratio (M-H, Random, 95% CI)          | 1.02 [0.89, 1.16]      |
| 1.1.1 Medical                          | 6       | 1360         | Risk Ratio (M-H, Random, 95% CI)          | 1.02 [0.89, 1.16]      |
| 1.1.2 Surgical                         | 3       | 142          | Risk Ratio (M-H, Random, 95% CI)          | 1.10 [0.07, 17.01]     |
| 1.2 PaO <sub>2</sub> /FiO <sub>2</sub> | 8       | 1444         | Mean Difference (IV, Random, 95% CI)      | 50.46 [33.93, 66.99]   |
| 1.2.1 Medical                          | 6       | 1327         | Mean Difference (IV, Random, 95% CI)      | 56.58 [42.29, 70.87]   |
| 1.2.2 Surgical                         | 2       | 117          | Mean Difference (IV, Random, 95% CI)      | 17.50 [-68.47, 103.46] |
| 1.3 A-aDO <sub>2</sub>                 | 4       | 164          | Std. Mean Difference (IV, Random, 95% CI) | -1.62 [-3.12, -0.11]   |
| 1.3.1 Medical                          | 2       | 46           | Std. Mean Difference (IV, Random, 95% CI) | -1.33 [-4.58, 1.93]    |
| 1.3.2 Surgical                         | 2       | 118          | Std. Mean Difference (IV, Random, 95% CI) | -1.97 [-4.66, 0.73]    |
| 1.4 Compliance                         | 3       | 189          | Mean Difference (IV, Random, 95% CI)      | 8.46 [3.11, 13.82]     |



|                       |   |      |                                      |                     |
|-----------------------|---|------|--------------------------------------|---------------------|
| 1.4.1 Medical         | 2 | 100  | Mean Difference (IV, Random, 95% CI) | 7.41 [-1.78, 16.61] |
| 1.4.2 Surgical        | 1 | 89   | Mean Difference (IV, Random, 95% CI) | 9.00 [2.41, 15.59]  |
| 1.5 Hypoxemia         | 5 | 1320 | Risk Ratio (M-H, Random, 95% CI)     | 0.60 [0.40, 0.92]   |
| 1.5.1 Medical         | 3 | 1188 | Risk Ratio (M-H, Random, 95% CI)     | 0.52 [0.24, 1.16]   |
| 1.5.2 Surgical        | 2 | 132  | Risk Ratio (M-H, Random, 95% CI)     | 0.63 [0.43, 0.93]   |
| 1.6 Atelectasis       | 5 | 1255 | Risk Ratio (M-H, Random, 95% CI)     | 1.02 [0.81, 1.28]   |
| 1.6.1 Medical         | 3 | 1188 | Risk Ratio (M-H, Random, 95% CI)     | 0.92 [0.58, 1.46]   |
| 1.6.2 Surgical        | 2 | 67   | Risk Ratio (M-H, Random, 95% CI)     | 1.05 [0.78, 1.41]   |
| 1.7 Barotrauma        | 7 | 1372 | Risk Ratio (M-H, Random, 95% CI)     | 0.78 [0.55, 1.11]   |
| 1.7.1 Medical         | 5 | 1305 | Risk Ratio (M-H, Random, 95% CI)     | 0.78 [0.55, 1.11]   |
| 1.7.2 Surgical        | 2 | 67   | Risk Ratio (M-H, Random, 95% CI)     | Not estimable       |
| 1.8 Hypotension       | 5 | 283  | Risk Ratio (M-H, Random, 95% CI)     | 1.15 [0.71, 1.84]   |
| 1.8.1 Medical         | 4 | 259  | Risk Ratio (M-H, Random, 95% CI)     | 1.15 [0.71, 1.84]   |
| 1.8.2 Surgical        | 1 | 24   | Risk Ratio (M-H, Random, 95% CI)     | Not estimable       |
| 1.9 CVP               | 3 | 106  | Mean Difference (IV, Random, 95% CI) | 1.37 [0.38, 2.37]   |
| 1.9.1 Medical         | 1 | 63   | Mean Difference (IV, Random, 95% CI) | 1.70 [0.57, 2.83]   |
| 1.9.2 Surgical        | 2 | 43   | Mean Difference (IV, Random, 95% CI) | 0.17 [-1.99, 2.33]  |
| 1.10 PRBC transfusion | 3 | 1138 | Mean Difference (IV, Random, 95% CI) | -0.38 [-0.77, 0.02] |

|                              |    |      |                                           |                     |
|------------------------------|----|------|-------------------------------------------|---------------------|
| 1.10.1 Medical               | 1  | 969  | Mean Difference (IV, Random, 95% CI)      | Not estimable       |
| 1.10.2 Surgical              | 2  | 169  | Mean Difference (IV, Random, 95% CI)      | -0.38 [-0.77, 0.02] |
| 1.11 Duration of ventilation | 10 | 1510 | Std. Mean Difference (IV, Random, 95% CI) | -0.03 [-0.27, 0.21] |
| 1.11.1 Medical               | 6  | 1301 | Std. Mean Difference (IV, Random, 95% CI) | -0.09 [-0.20, 0.02] |
| 1.11.2 Surgical              | 4  | 209  | Std. Mean Difference (IV, Random, 95% CI) | 0.28 [-0.71, 1.27]  |
| 1.12 Hospital stay           | 5  | 1245 | Mean Difference (IV, Random, 95% CI)      | -0.02 [-0.69, 0.66] |
| 1.12.1 Medical               | 3  | 1134 | Mean Difference (IV, Random, 95% CI)      | -2.11 [-5.95, 1.72] |
| 1.12.2 Surgical              | 2  | 111  | Mean Difference (IV, Random, 95% CI)      | 0.04 [-0.46, 0.54]  |
| 1.13 ICU mortality           | 5  | 1073 | Risk Ratio (M-H, Random, 95% CI)          | 1.09 [0.92, 1.28]   |
| 1.13.1 Medical               | 4  | 1058 | Risk Ratio (M-H, Random, 95% CI)          | 1.09 [0.92, 1.28]   |
| 1.13.2 Surgical              | 1  | 15   | Risk Ratio (M-H, Random, 95% CI)          | Not estimable       |

### **Subgroup analyses: zero end-expiratory pressure (ZEEP) vs. positive end-expiratory pressure (PEEP) different from ZEEP as lower PEEP**

Subgroup analyses according to the use of zero end-expiratory pressure (ZEEP) or positive end-expiratory pressure (PEEP) different from ZEEP as lower PEEP in the studies. A significantly lower incidence of hypoxemia with higher PEEP in studies comparing higher PEEP with ZEEP vs. studies comparing higher PEEP with lower PEEP different from ZEEP ( $p = 0.02$ ) was observed.

Abbreviations: M-H, Mantel–Haenszel; CI, confidence interval;  $\text{PaO}_2/\text{FiO}_2$ , arterial partial pressure of oxygen to fraction of inspired oxygen ratio; IV, inverse variance; A-aDO<sub>2</sub>, alveolar-arterial oxygen pressure difference; ARDS, acute respiratory distress syndrome; CVP, central venous pressure; PRBC, packed red blood cell; ICU, intensive care unit.

| <b>Outcome or Subgroup</b>             | <b>Studies</b> | <b>Participants</b> | <b>Statistical Method</b>                 | <b>Effect Estimate</b> |
|----------------------------------------|----------------|---------------------|-------------------------------------------|------------------------|
| 2.1 Hospital mortality                 | 9              | 1502                | Risk Ratio (M-H, Random, 95% CI)          | 1.02 [0.89, 1.16]      |
| 2.1.1 ZEEP                             | 6              | 419                 | Risk Ratio (M-H, Random, 95% CI)          | 0.85 [0.64, 1.12]      |
| 2.1.2 Lower PEEP                       | 3              | 1083                | Risk Ratio (M-H, Random, 95% CI)          | 1.08 [0.93, 1.25]      |
| 2.2 PaO <sub>2</sub> /FiO <sub>2</sub> | 8              | 1444                | Mean Difference (IV, Random, 95% CI)      | 50.46 [33.93, 66.99]   |
| 2.2.1 ZEEP                             | 4              | 238                 | Mean Difference (IV, Random, 95% CI)      | 45.75 [5.42, 86.09]    |
| 2.2.2 Lower PEEP                       | 4              | 1206                | Mean Difference (IV, Random, 95% CI)      | 52.97 [34.89, 71.05]   |
| 2.3 A-aDO <sub>2</sub>                 | 4              | 164                 | Std. Mean Difference (IV, Random, 95% CI) | -1.62 [-3.12, -0.11]   |
| 2.3.1 ZEEP                             | 2              | 46                  | Std. Mean Difference (IV, Random, 95% CI) | -1.33 [-4.58, 1.93]    |
| 2.3.2 Lower PEEP                       | 2              | 118                 | Std. Mean Difference (IV, Random, 95% CI) | -1.97 [-4.66, 0.73]    |
| 2.4 Compliance                         | 3              | 189                 | Mean Difference (IV, Random, 95% CI)      | 8.46 [3.11, 13.82]     |
| 2.4.1 ZEEP                             | 2              | 100                 | Mean Difference (IV, Random, 95% CI)      | 7.41 [-1.78, 16.61]    |
| 2.4.2 Lower PEEP                       | 1              | 89                  | Mean Difference (IV, Random, 95% CI)      | 9.00 [2.41, 15.59]     |
| 2.5 Hypoxemia                          | 5              | 1320                | Risk Ratio (M-H, Random, 95% CI)          | 0.60 [0.40, 0.92]      |
| 2.5.1 ZEEP                             | 3              | 262                 | Risk Ratio (M-H, Random, 95% CI)          | 0.37 [0.22, 0.63]      |
| 2.5.2 Lower PEEP                       | 2              | 1058                | Risk Ratio (M-H, Random, 95% CI)          | 0.75 [0.55, 1.04]      |
| 2.6 Atelectasis                        | 5              | 1255                | Risk Ratio (M-H, Random, 95% CI)          | 1.02 [0.81, 1.28]      |

|                                     |   |      |                                      |                        |
|-------------------------------------|---|------|--------------------------------------|------------------------|
| 2.6.1 ZEEP                          | 4 | 286  | Risk Ratio (M-H, Random, 95% CI)     | 1.07 [0.86, 1.33]      |
| 2.6.2 Lower PEEP                    | 1 | 969  | Risk Ratio (M-H, Random, 95% CI)     | 0.72 [0.38, 1.40]      |
| 2.7 Barotrauma                      | 7 | 1372 | Risk Ratio (M-H, Random, 95% CI)     | 0.78 [0.55, 1.11]      |
| 2.7.1 ZEEP                          | 5 | 365  | Risk Ratio (M-H, Random, 95% CI)     | 0.83 [0.55, 1.24]      |
| 2.7.2 Lower PEEP                    | 2 | 1007 | Risk Ratio (M-H, Random, 95% CI)     | 0.66 [0.33, 1.31]      |
| 2.8 Ventilator-associated pneumonia | 3 | 1188 | Risk Ratio (M-H, Random, 95% CI)     | 0.62 [0.32, 1.23]      |
| 2.8.1 ZEEP                          | 2 | 219  | Risk Ratio (M-H, Random, 95% CI)     | 0.47 [0.23, 0.94]      |
| 2.8.2 Lower PEEP                    | 1 | 969  | Risk Ratio (M-H, Random, 95% CI)     | 1.13 [0.38, 3.33]      |
| 2.9 ARDS                            | 6 | 1315 | Risk Ratio (M-H, Random, 95% CI)     | 0.50 [0.32, 0.78]      |
| 2.9.1 ZEEP                          | 5 | 346  | Risk Ratio (M-H, Random, 95% CI)     | 0.52 [0.29, 0.92]      |
| 2.9.2 Lower PEEP                    | 1 | 969  | Risk Ratio (M-H, Random, 95% CI)     | 0.37 [0.13, 1.03]      |
| 2.10 Cardiac index                  | 3 | 127  | Mean Difference (IV, Random, 95% CI) | 0.04 [-0.21, 0.29]     |
| 2.10.1 ZEEP                         | 1 | 15   | Mean Difference (IV, Random, 95% CI) | 0.10 [-0.78, 0.98]     |
| 2.10.2 Lower PEEP                   | 2 | 112  | Mean Difference (IV, Random, 95% CI) | 0.04 [-0.23, 0.30]     |
| 2.11 CVP                            | 3 | 106  | Mean Difference (IV, Random, 95% CI) | 1.37 [0.38, 2.37]      |
| 2.11.1 ZEEP                         | 2 | 78   | Mean Difference (IV, Random, 95% CI) | 1.72 [0.60, 2.84]      |
| 2.11.2 Lower PEEP                   | 1 | 28   | Mean Difference (IV, Random, 95% CI) | 0.00 [-2.22, 2.22]     |
| 2.12 Postoperative bleeding         | 2 | 601  | Mean Difference (IV, Random, 95% CI) | 26.47 [-99.95, 152.89] |

|                              |    |      |                                           |                         |
|------------------------------|----|------|-------------------------------------------|-------------------------|
| 2.12.1 ZEEP                  | 1  | 517  | Mean Difference (IV, Random, 95% CI)      | -20.00 [-96.82, 56.82]  |
| 2.12.2 Lower PEEP            | 1  | 84   | Mean Difference (IV, Random, 95% CI)      | 116.00 [-52.52, 284.52] |
| 2.13 PRBC transfusion        | 3  | 1138 | Mean Difference (IV, Random, 95% CI)      | -0.38 [-0.77, 0.02]     |
| 2.13.1 ZEEP                  | 1  | 85   | Mean Difference (IV, Random, 95% CI)      | -0.42 [-0.92, 0.08]     |
| 2.13.2 Lower PEEP            | 2  | 1053 | Mean Difference (IV, Random, 95% CI)      | -0.30 [-0.94, 0.34]     |
| 2.14 Duration of ventilation | 10 | 1510 | Std. Mean Difference (IV, Random, 95% CI) | -0.03 [-0.27, 0.21]     |
| 2.14.1 ZEEP                  | 5  | 318  | Std. Mean Difference (IV, Random, 95% CI) | 0.15 [-0.33, 0.63]      |
| 2.14.2 Lower PEEP            | 5  | 1192 | Std. Mean Difference (IV, Random, 95% CI) | -0.13 [-0.41, 0.15]     |
| 2.15 ICU stay                | 4  | 1202 | Mean Difference (IV, Random, 95% CI)      | -1.00 [-2.51, 0.51]     |
| 2.15.1 ZEEP                  | 3  | 233  | Mean Difference (IV, Random, 95% CI)      | -1.41 [-6.15, 3.32]     |
| 2.15.2 Lower PEEP            | 1  | 969  | Mean Difference (IV, Random, 95% CI)      | -0.90 [-2.28, 0.48]     |
| 2.16 Hospital stay           | 5  | 1245 | Mean Difference (IV, Random, 95% CI)      | -0.02 [-0.69, 0.66]     |
| 2.16.1 ZEEP                  | 1  | 127  | Mean Difference (IV, Random, 95% CI)      | -6.80 [-13.83, 0.23]    |
| 2.16.2 Lower PEEP            | 4  | 1118 | Mean Difference (IV, Random, 95% CI)      | -0.04 [-0.36, 0.29]     |
| 2.17 ICU mortality           | 5  | 1073 | Risk Ratio (M-H, Random, 95% CI)          | 1.09 [0.92, 1.28]       |
| 2.17.1 ZEEP                  | 3  | 67   | Risk Ratio (M-H, Random, 95% CI)          | 0.82 [0.27, 2.52]       |
| 2.17.2 Lower PEEP            | 2  | 1006 | Risk Ratio (M-H, Random, 95% CI)          | 1.09 [0.93, 1.29]       |
| 2.18 28-day mortality        | 3  | 1152 | Risk Ratio (M-H, Random, 95% CI)          | 0.68 [0.33, 1.40]       |

|                   |   |      |                                  |                   |
|-------------------|---|------|----------------------------------|-------------------|
| 2.18.1 ZEEP       | 1 | 63   | Risk Ratio (M-H, Random, 95% CI) | 0.71 [0.36, 1.39] |
| 2.18.2 Lower PEEP | 2 | 1089 | Risk Ratio (M-H, Random, 95% CI) | 0.66 [0.24, 1.85] |

**Subgroup analyses: tidal volume > 8 mL/kg vs. tidal volume < 8 mL/kg**

Subgroup analyses according to the use of tidal volumes (TV) greater than or lower than 8 mL/kg in the studies. We observed a significantly lower alveolar-arterial oxygen pressure difference (A-aDO<sub>2</sub>) with higher PEEP in studies using tidal volumes > 8 mL/kg vs. studies using tidal volumes < 8 mL/kg (p < 0.01) and a trend towards a reduction of hospital mortality (p = 0.09) and atelectasis (p = 0.08) with higher PEEP in studies using tidal volumes > 8 mL/kg and < 8 mL/kg, respectively.

Abbreviations: M-H, Mantel–Haenszel; CI, confidence interval; IV, inverse variance; ARDS, acute respiratory distress syndrome; ICU, intensive care unit.

| Outcome or Subgroup    | Studies | Participants | Statistical Method                        | Effect Estimate      |
|------------------------|---------|--------------|-------------------------------------------|----------------------|
| 3.1 Hospital mortality | 7       | 1421         | Risk Ratio (M-H, Random, 95% CI)          | 1.03 [0.90, 1.17]    |
| 3.1.1 VT>8             | 3       | 255          | Risk Ratio (M-H, Random, 95% CI)          | 0.75 [0.51, 1.10]    |
| 3.1.2 VT<8             | 4       | 1166         | Risk Ratio (M-H, Random, 95% CI)          | 1.07 [0.93, 1.24]    |
| 3.2 A-aDO <sub>2</sub> | 4       | 164          | Std. Mean Difference (IV, Random, 95% CI) | -1.62 [-3.12, -0.11] |
| 3.2.1 VT>8             | 2       | 54           | Std. Mean Difference (IV, Random, 95% CI) | -3.21 [-4.06, -2.36] |
| 3.2.2 VT<8             | 2       | 110          | Std. Mean Difference (IV, Random, 95% CI) | -0.25 [-1.18, 0.68]  |
| 3.3 Compliance         | 3       | 189          | Mean Difference (IV, Random, 95% CI)      | 8.46 [3.11, 13.82]   |
| 3.3.1 VT>8             | 1       | 79           | Mean Difference (IV, Random, 95% CI)      | 3.00 [-14.88, 20.88] |

|                                     |   |      |                                      |                    |
|-------------------------------------|---|------|--------------------------------------|--------------------|
| 3.3.2 VT<8                          | 2 | 110  | Mean Difference (IV, Random, 95% CI) | 9.00 [3.39, 14.61] |
| 3.4 Hypoxemia                       | 4 | 1277 | Risk Ratio (M-H, Random, 95% CI)     | 0.58 [0.37, 0.92]  |
| 3.4.1 VT>8                          | 1 | 92   | Risk Ratio (M-H, Random, 95% CI)     | 0.27 [0.03, 2.35]  |
| 3.4.2 VT<8                          | 3 | 1185 | Risk Ratio (M-H, Random, 95% CI)     | 0.60 [0.37, 0.96]  |
| 3.5 Atelectasis                     | 4 | 1212 | Risk Ratio (M-H, Random, 95% CI)     | 1.00 [0.76, 1.32]  |
| 3.5.1 VT>8                          | 2 | 116  | Risk Ratio (M-H, Random, 95% CI)     | 1.13 [0.90, 1.43]  |
| 3.5.2 VT<8                          | 2 | 1096 | Risk Ratio (M-H, Random, 95% CI)     | 0.71 [0.45, 1.13]  |
| 3.6 Barotrauma                      | 5 | 1291 | Risk Ratio (M-H, Random, 95% CI)     | 0.77 [0.54, 1.09]  |
| 3.6.1 VT>8                          | 3 | 195  | Risk Ratio (M-H, Random, 95% CI)     | 0.87 [0.58, 1.32]  |
| 3.6.2 VT<8                          | 2 | 1096 | Risk Ratio (M-H, Random, 95% CI)     | 0.54 [0.28, 1.07]  |
| 3.7 Ventilator-associated pneumonia | 3 | 1188 | Risk Ratio (M-H, Random, 95% CI)     | 0.62 [0.32, 1.23]  |
| 3.7.1 VT>8                          | 1 | 92   | Risk Ratio (M-H, Random, 95% CI)     | 0.73 [0.22, 2.41]  |
| 3.7.2 VT<8                          | 2 | 1096 | Risk Ratio (M-H, Random, 95% CI)     | 0.61 [0.21, 1.83]  |
| 3.8 ARDS                            | 6 | 1315 | Risk Ratio (M-H, Random, 95% CI)     | 0.50 [0.32, 0.78]  |
| 3.8.1 VT>8                          | 2 | 171  | Risk Ratio (M-H, Random, 95% CI)     | 0.59 [0.24, 1.41]  |
| 3.8.2 VT<8                          | 4 | 1144 | Risk Ratio (M-H, Random, 95% CI)     | 0.35 [0.16, 0.76]  |
| 3.9 Hypotension                     | 5 | 283  | Risk Ratio (M-H, Random, 95% CI)     | 1.15 [0.71, 1.84]  |
| 3.9.1 VT>8                          | 4 | 220  | Risk Ratio (M-H, Random, 95% CI)     | 2.73 [0.29, 25.73] |

|                              |   |      |                                           |                      |
|------------------------------|---|------|-------------------------------------------|----------------------|
| 3.9.2 VT<8                   | 1 | 63   | Risk Ratio (M-H, Random, 95% CI)          | 1.10 [0.68, 1.79]    |
| 3.10 Cardiac index           | 3 | 127  | Mean Difference (IV, Random, 95% CI)      | 0.04 [-0.21, 0.29]   |
| 3.10.1 VT>8                  | 1 | 84   | Mean Difference (IV, Random, 95% CI)      | 0.00 [-0.33, 0.33]   |
| 3.10.2 VT<8                  | 2 | 43   | Mean Difference (IV, Random, 95% CI)      | 0.10 [-0.30, 0.50]   |
| 3.11 Duration of ventilation | 9 | 1472 | Std. Mean Difference (IV, Random, 95% CI) | -0.07 [-0.32, 0.17]  |
| 3.11.1 VT>8                  | 5 | 224  | Std. Mean Difference (IV, Random, 95% CI) | 0.25 [-0.44, 0.93]   |
| 3.11.2 VT<8                  | 4 | 1248 | Std. Mean Difference (IV, Random, 95% CI) | -0.16 [-0.34, 0.02]  |
| 3.12 ICU stay                | 4 | 1202 | Mean Difference (IV, Random, 95% CI)      | -1.00 [-2.51, 0.51]  |
| 3.12.1 VT>8                  | 1 | 79   | Mean Difference (IV, Random, 95% CI)      | -9.30 [-21.28, 2.68] |
| 3.12.2 VT<8                  | 3 | 1123 | Mean Difference (IV, Random, 95% CI)      | -0.88 [-2.15, 0.38]  |
| 3.13 Hospital stay           | 4 | 1207 | Mean Difference (IV, Random, 95% CI)      | -0.04 [-0.84, 0.76]  |
| 3.13.1 VT>8                  | 2 | 111  | Mean Difference (IV, Random, 95% CI)      | 0.04 [-0.46, 0.54]   |
| 3.13.2 VT<8                  | 2 | 1096 | Mean Difference (IV, Random, 95% CI)      | -2.93 [-8.42, 2.56]  |
| 3.14 ICU mortality           | 4 | 1035 | Risk Ratio (M-H, Random, 95% CI)          | 1.09 [0.92, 1.29]    |
| 3.14.1 VT>8                  | 1 | 25   | Risk Ratio (M-H, Random, 95% CI)          | 2.17 [0.22, 20.94]   |
| 3.14.2 VT<8                  | 3 | 1010 | Risk Ratio (M-H, Random, 95% CI)          | 1.09 [0.92, 1.28]    |



### Subgroup analyses: studies published before 2000 vs. studies published after 2000

Subgroup analyses according to year of publication (before 2000 vs. after 2000). A significantly lower alveolar-arterial oxygen pressure difference (A-aDO<sub>2</sub>) with higher PEEP in studies published before 2000 ( $p < 0.01$ ) was detected. Further, a trend towards lower atelectasis occurrence with higher PEEP in studies published after 2000 ( $p = 0.08$ ) and towards lower hospital mortality with higher PEEP in studies published before 2000 ( $p = 0.07$ ) was observed.

Abbreviations: IV, inverse variance; CI, confidence interval; M-H, Mantel–Haenszel; ARDS, acute respiratory distress syndrome; PRBC, packed red blood cell; ICU, intensive care unit.

| Outcome or Subgroup    | Studies | Participants | Statistical Method                        | Effect Estimate      |
|------------------------|---------|--------------|-------------------------------------------|----------------------|
| 4.1 Hospital mortality | 9       | 1502         | Risk Ratio (M-H, Random, 95% CI)          | 1.02 [0.89, 1.16]    |
| 4.1.1 >2000            | 5       | 1250         | Risk Ratio (M-H, Random, 95% CI)          | 1.07 [0.93, 1.24]    |
| 4.1.2 <2000            | 4       | 252          | Risk Ratio (M-H, Random, 95% CI)          | 0.74 [0.52, 1.07]    |
| 4.2 A-aDO <sub>2</sub> | 4       | 164          | Std. Mean Difference (IV, Random, 95% CI) | -1.62 [-3.12, -0.11] |
| 4.2.1 >2000            | 2       | 110          | Std. Mean Difference (IV, Random, 95% CI) | -0.25 [-1.18, 0.68]  |
| 4.2.2 <2000            | 2       | 54           | Std. Mean Difference (IV, Random, 95% CI) | -3.21 [-4.06, -2.36] |
| 4.3 Compliance         | 3       | 189          | Mean Difference (IV, Random, 95% CI)      | 8.46 [3.11, 13.82]   |
| 4.3.1 >2000            | 2       | 110          | Mean Difference (IV, Random, 95% CI)      | 9.00 [3.39, 14.61]   |
| 4.3.2 <2000            | 1       | 79           | Mean Difference (IV, Random, 95% CI)      | 3.00 [-14.88, 20.88] |
| 4.4 Hypoxemia          | 5       | 1320         | Risk Ratio (M-H, Random, 95% CI)          | 0.60 [0.40, 0.92]    |

|                                     |   |      |                                      |                        |
|-------------------------------------|---|------|--------------------------------------|------------------------|
| 4.4.1 >2000                         | 3 | 1185 | Risk Ratio (M-H, Random, 95% CI)     | 0.60 [0.37, 0.96]      |
| 4.4.2 <2000                         | 2 | 135  | Risk Ratio (M-H, Random, 95% CI)     | 0.59 [0.14, 2.41]      |
| 4.5 Atelectasis                     | 5 | 1255 | Risk Ratio (M-H, Random, 95% CI)     | 1.02 [0.81, 1.28]      |
| 4.5.1 >2000                         | 2 | 1096 | Risk Ratio (M-H, Random, 95% CI)     | 0.71 [0.45, 1.13]      |
| 4.5.2 <2000                         | 3 | 159  | Risk Ratio (M-H, Random, 95% CI)     | 1.13 [0.90, 1.43]      |
| 4.6 Barotrauma                      | 7 | 1372 | Risk Ratio (M-H, Random, 95% CI)     | 0.78 [0.55, 1.11]      |
| 4.6.1 >2000                         | 2 | 1096 | Risk Ratio (M-H, Random, 95% CI)     | 0.54 [0.28, 1.07]      |
| 4.6.2 <2000                         | 5 | 276  | Risk Ratio (M-H, Random, 95% CI)     | 0.89 [0.59, 1.34]      |
| 4.7 Ventilator-associated pneumonia | 3 | 1188 | Risk Ratio (M-H, Random, 95% CI)     | 0.62 [0.32, 1.23]      |
| 4.7.1 >2000                         | 2 | 1096 | Risk Ratio (M-H, Random, 95% CI)     | 0.61 [0.21, 1.83]      |
| 4.7.2 <2000                         | 1 | 92   | Risk Ratio (M-H, Random, 95% CI)     | 0.73 [0.22, 2.41]      |
| 4.8 ARDS                            | 6 | 1315 | Risk Ratio (M-H, Random, 95% CI)     | 0.50 [0.32, 0.78]      |
| 4.8.1 >2000                         | 4 | 1144 | Risk Ratio (M-H, Random, 95% CI)     | 0.35 [0.16, 0.76]      |
| 4.8.2 <2000                         | 2 | 171  | Risk Ratio (M-H, Random, 95% CI)     | 0.59 [0.24, 1.41]      |
| 4.9 Hypotension                     | 5 | 283  | Risk Ratio (M-H, Random, 95% CI)     | 1.15 [0.71, 1.84]      |
| 4.9.1 >2000                         | 1 | 63   | Risk Ratio (M-H, Random, 95% CI)     | 1.10 [0.68, 1.79]      |
| 4.9.2 <2000                         | 4 | 220  | Risk Ratio (M-H, Random, 95% CI)     | 2.73 [0.29, 25.73]     |
| 4.10 Postoperative bleeding         | 2 | 601  | Mean Difference (IV, Random, 95% CI) | 26.47 [-99.95, 152.89] |

|                              |    |      |                                           |                         |
|------------------------------|----|------|-------------------------------------------|-------------------------|
| 4.10.1 >2000                 | 1  | 84   | Mean Difference (IV, Random, 95% CI)      | 116.00 [-52.52, 284.52] |
| 4.10.2 <2000                 | 1  | 517  | Mean Difference (IV, Random, 95% CI)      | -20.00 [-96.82, 56.82]  |
| 4.11 PRBC transfusion        | 3  | 1138 | Mean Difference (IV, Random, 95% CI)      | -0.38 [-0.77, 0.02]     |
| 4.11.1 >2000                 | 2  | 1053 | Mean Difference (IV, Random, 95% CI)      | -0.30 [-0.94, 0.34]     |
| 4.11.2 <2000                 | 1  | 85   | Mean Difference (IV, Random, 95% CI)      | -0.42 [-0.92, 0.08]     |
| 4.12 Duration of ventilation | 10 | 1510 | Std. Mean Difference (IV, Random, 95% CI) | -0.03 [-0.27, 0.21]     |
| 4.12.1 >2000                 | 5  | 1332 | Std. Mean Difference (IV, Random, 95% CI) | -0.13 [-0.26, -0.01]    |
| 4.12.2 <2000                 | 5  | 178  | Std. Mean Difference (IV, Random, 95% CI) | 0.43 [-0.35, 1.22]      |
| 4.13 ICU stay                | 4  | 1202 | Mean Difference (IV, Random, 95% CI)      | -1.00 [-2.51, 0.51]     |
| 4.13.1 >2000                 | 3  | 1123 | Mean Difference (IV, Random, 95% CI)      | -0.88 [-2.15, 0.38]     |
| 4.13.2 <2000                 | 1  | 79   | Mean Difference (IV, Random, 95% CI)      | -9.30 [-21.28, 2.68]    |
| 4.14 Hospital stay           | 5  | 1245 | Mean Difference (IV, Random, 95% CI)      | -0.02 [-0.69, 0.66]     |
| 4.14.1 >2000                 | 3  | 1180 | Mean Difference (IV, Random, 95% CI)      | -0.73 [-3.21, 1.74]     |
| 4.14.2 <2000                 | 2  | 65   | Mean Difference (IV, Random, 95% CI)      | -0.10 [-0.45, 0.25]     |
| 4.15 ICU mortality           | 5  | 1073 | Risk Ratio (M-H, Random, 95% CI)          | 1.09 [0.92, 1.28]       |
| 4.15.1 >2000                 | 3  | 1010 | Risk Ratio (M-H, Random, 95% CI)          | 1.09 [0.92, 1.28]       |
| 4.15.2 <2000                 | 2  | 63   | Risk Ratio (M-H, Random, 95% CI)          | 1.10 [0.37, 3.24]       |

## Forest plots of subgroup analyses

### Subgroup analysis (medical vs. surgical study population)

#### Hospital mortality

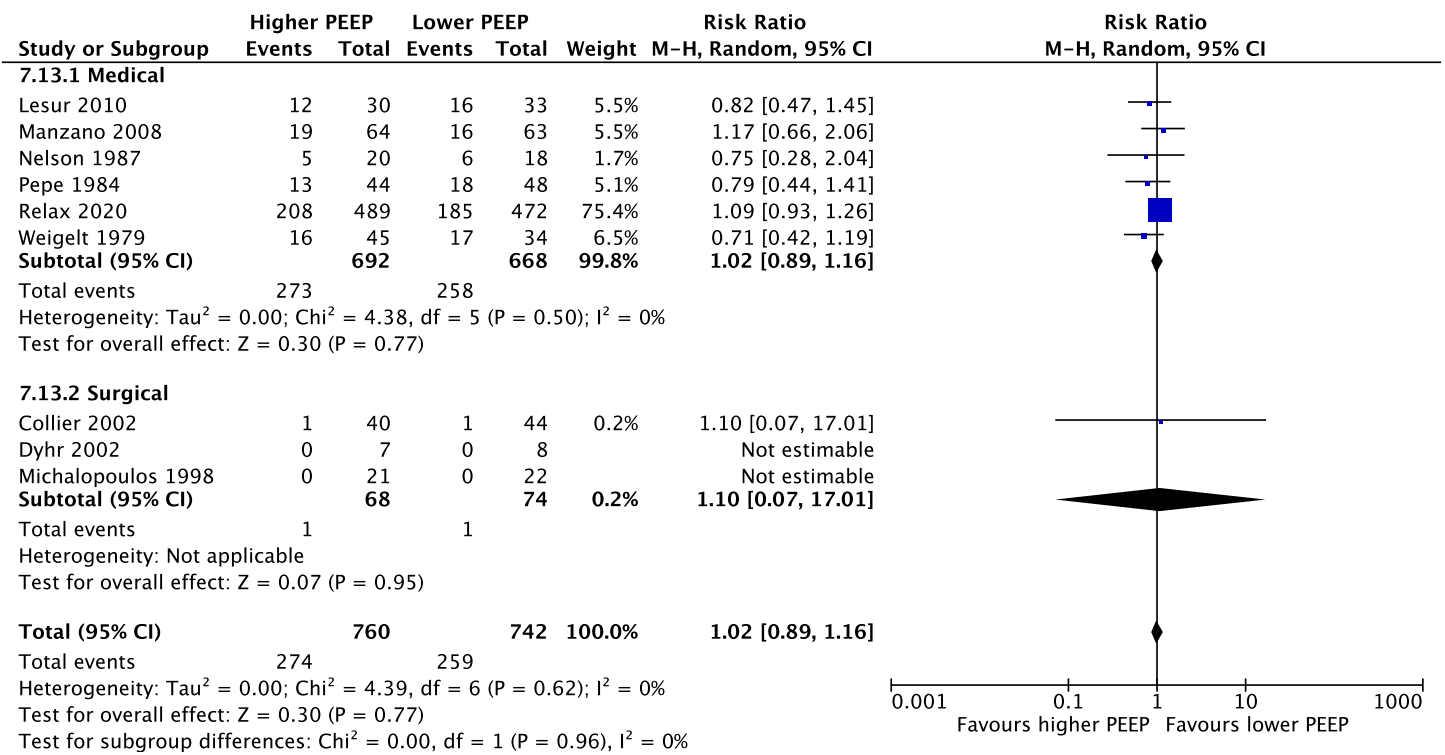

## Subgroup analysis (medical vs. surgical study population)

### PaO<sub>2</sub>/FiO<sub>2</sub>

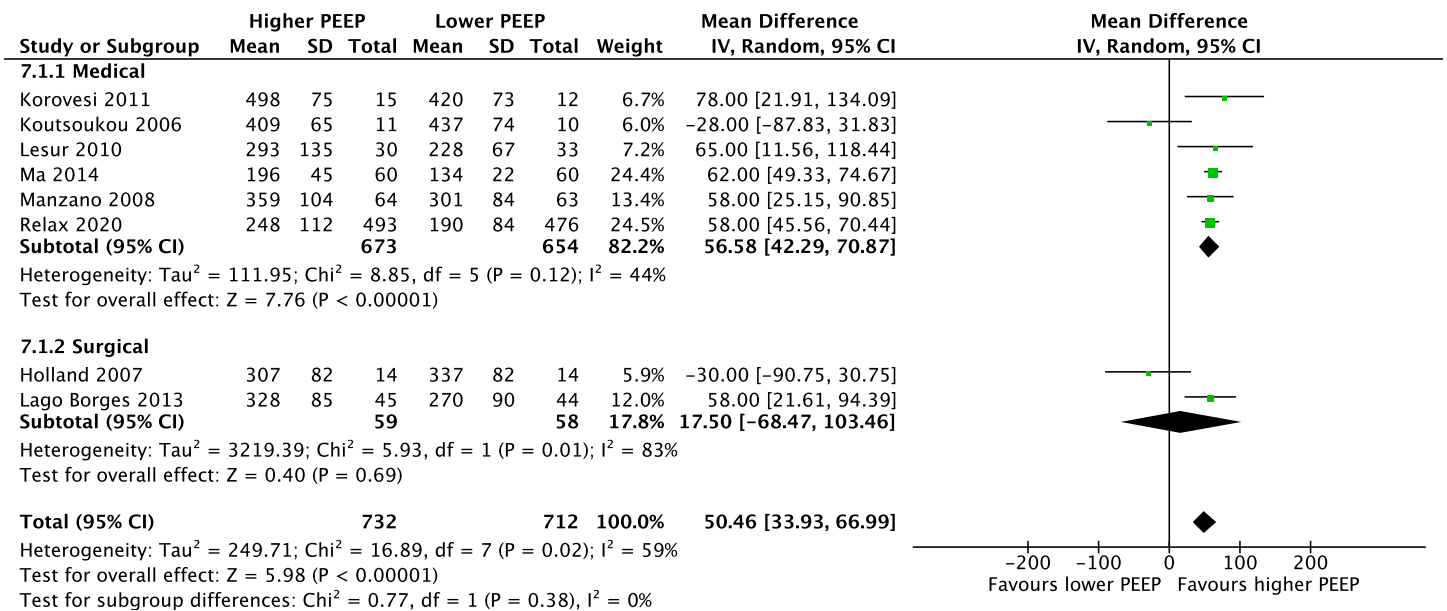

## Subgroup analysis (medical vs. surgical study population)

### A-aDO<sub>2</sub>

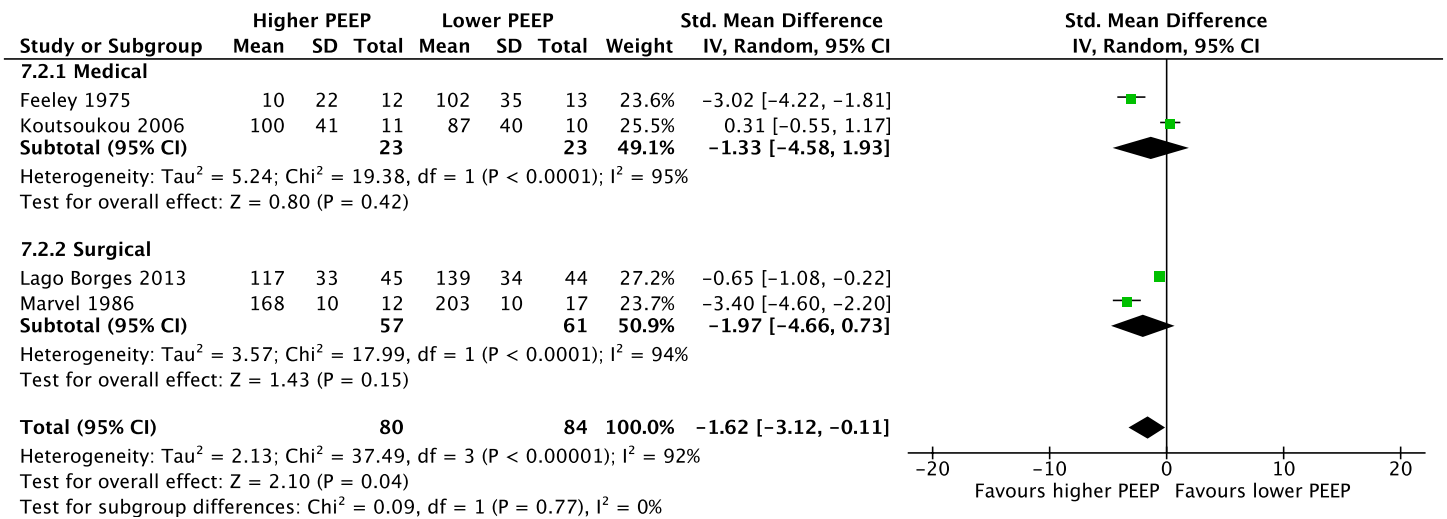

## Subgroup analysis (medical vs. surgical study population)

### Compliance

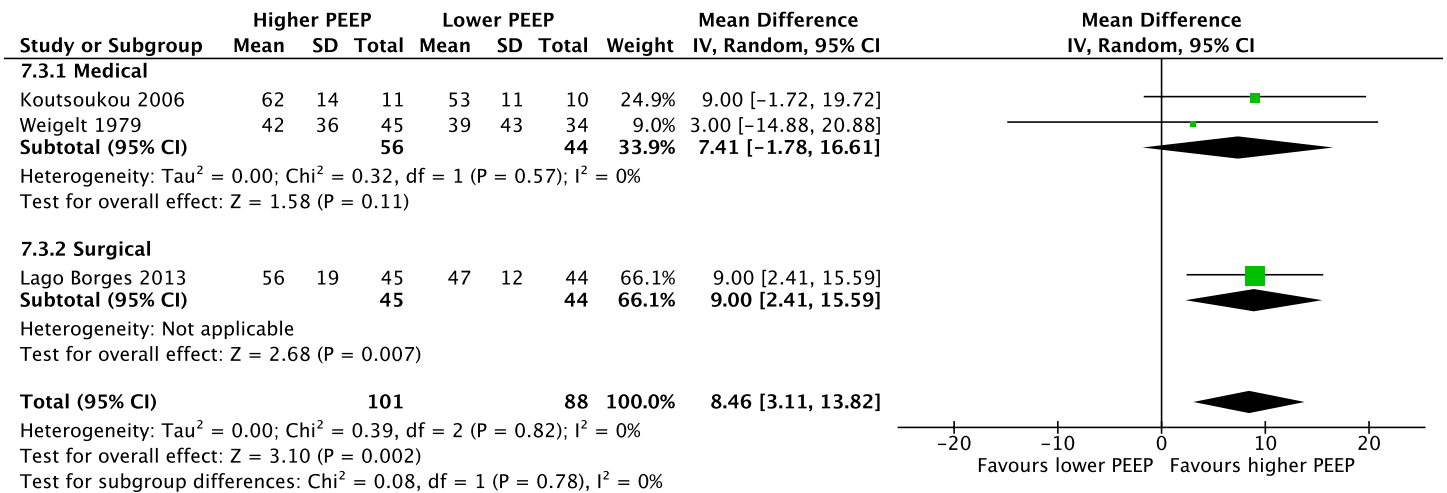

## Subgroup analysis (medical vs. surgical study population)

### Hypoxemia

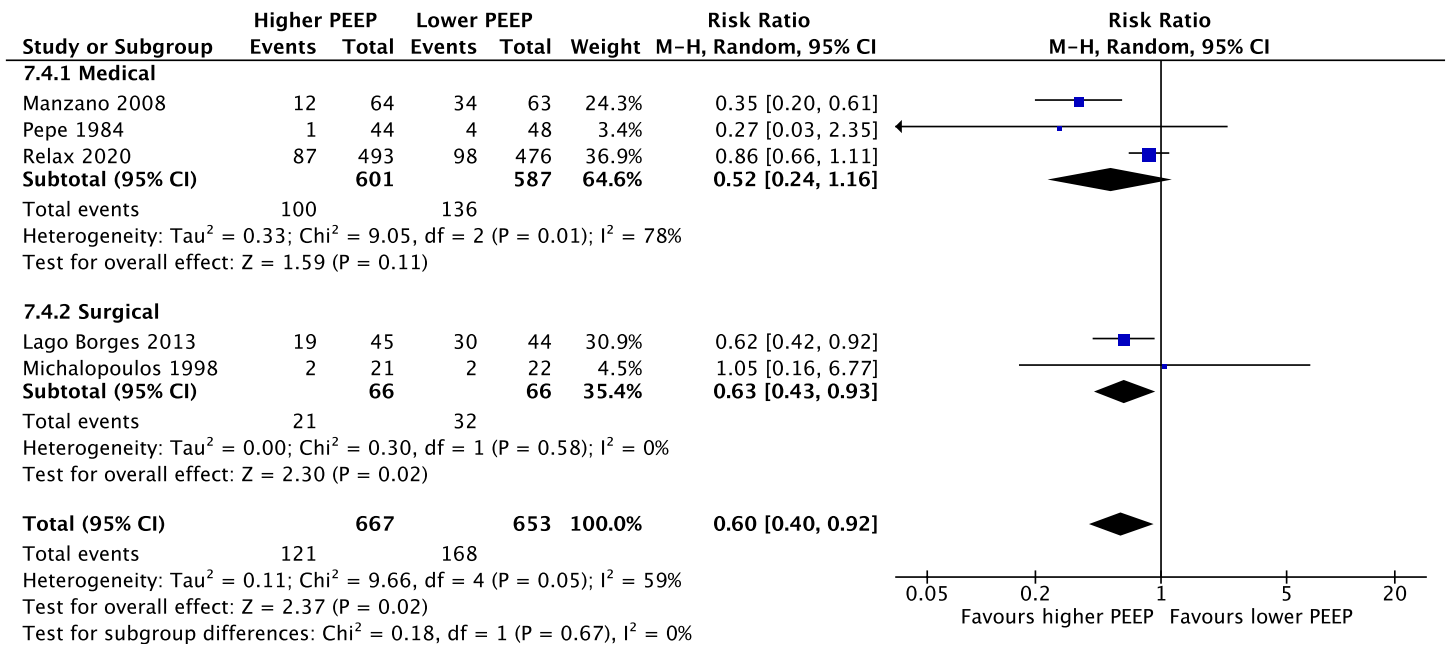



## Subgroup analysis (medical vs. surgical study population)

### Atelectasis

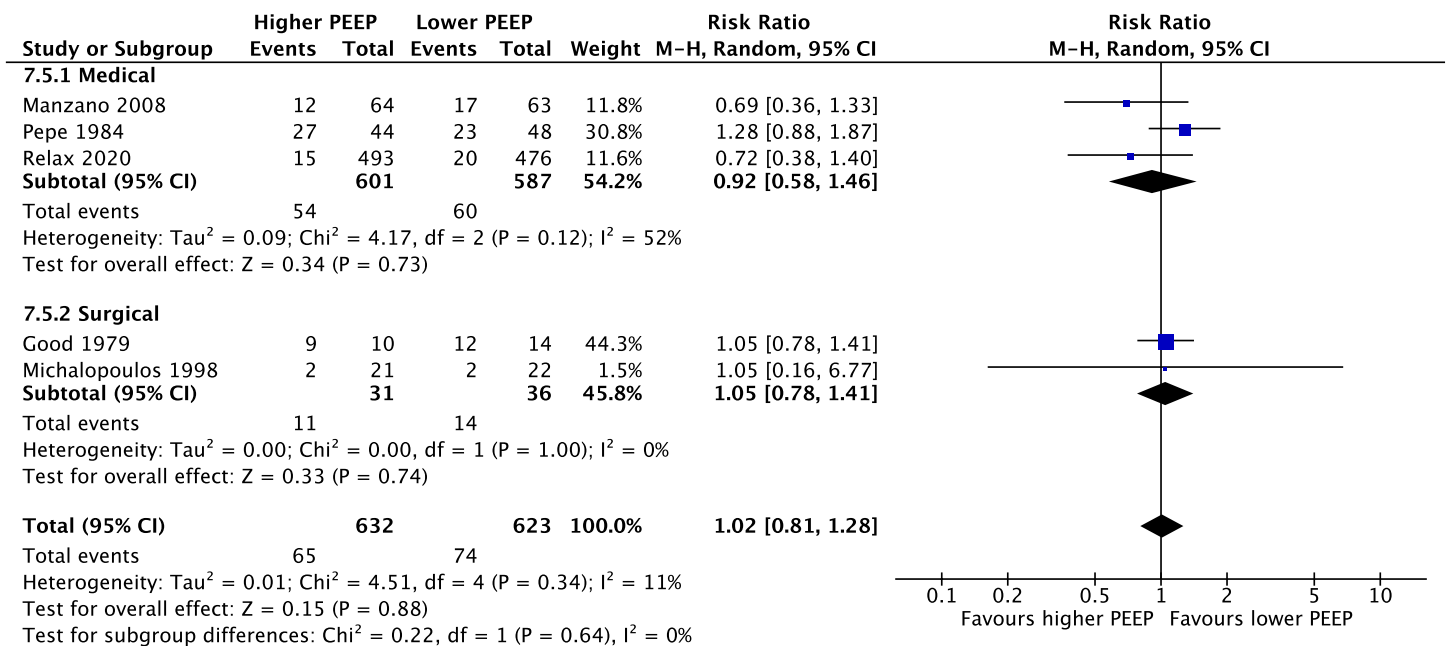

## Subgroup analysis (medical vs. surgical study population)

### Barotrauma

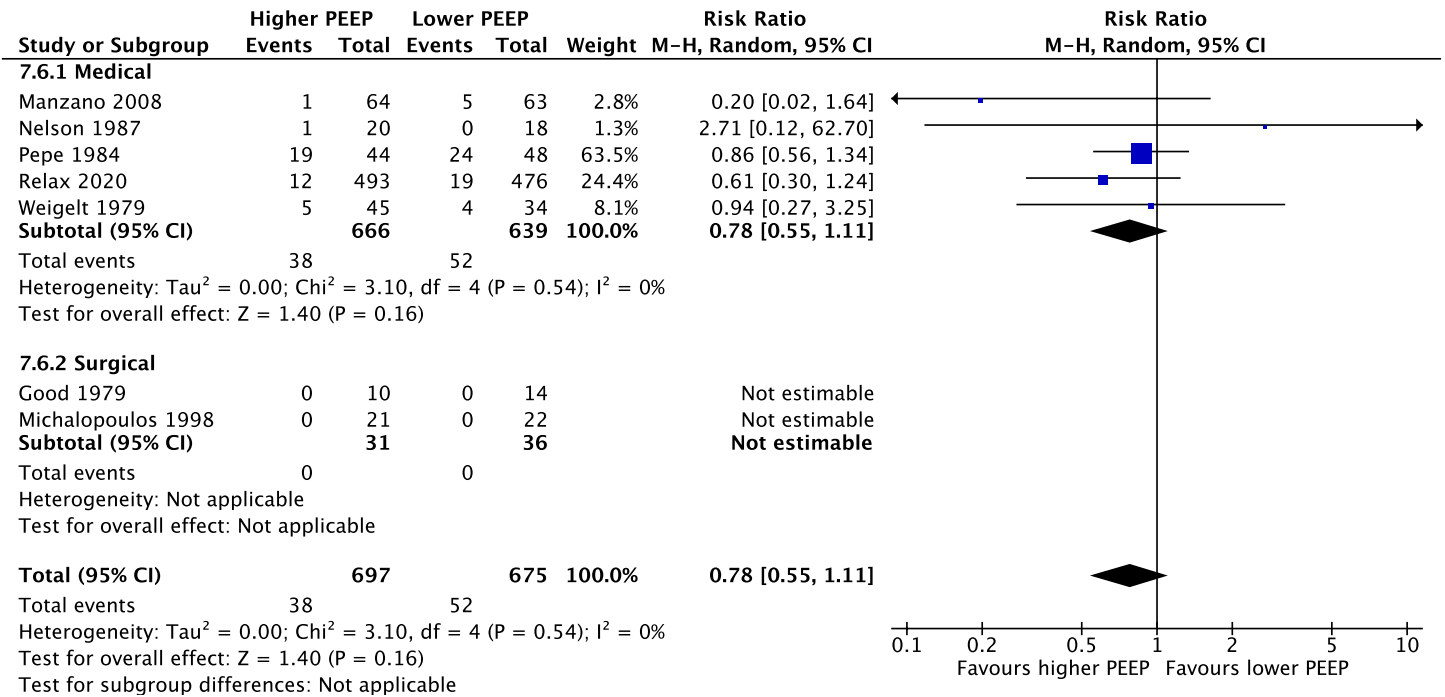

## Subgroup analysis (medical vs. surgical study population)

### Hypotension

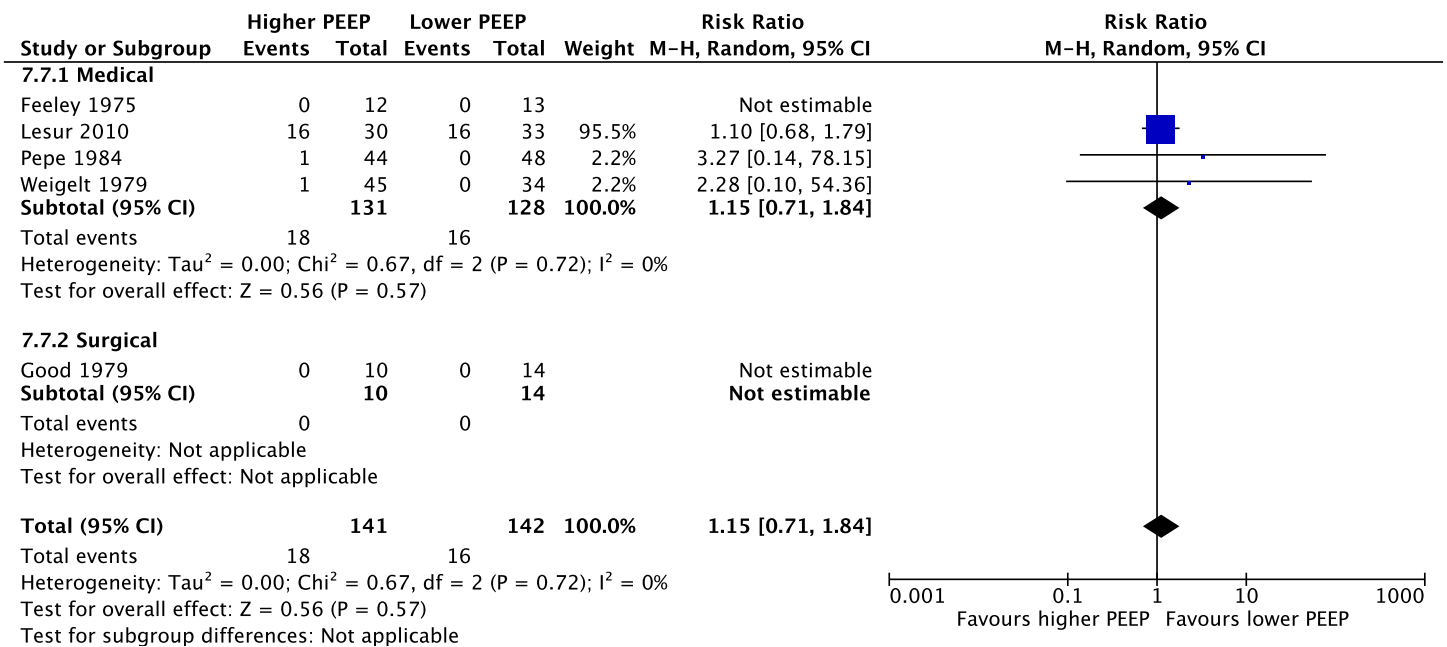

## Subgroup analysis (medical vs. surgical study population)

### Central venous pressure

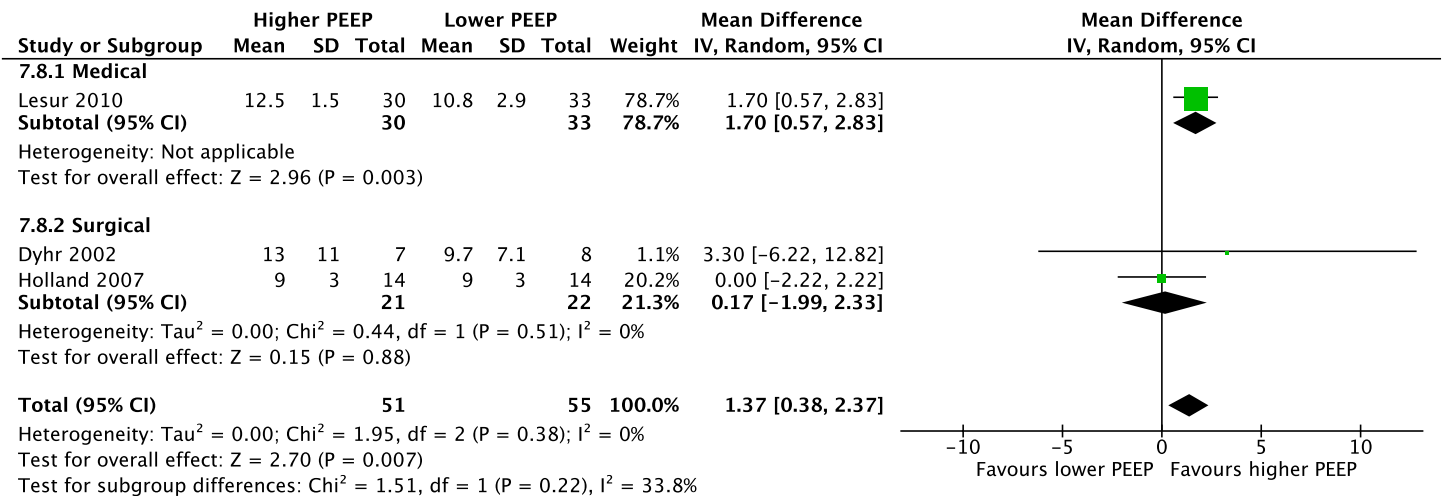

## Subgroup analysis (medical vs. surgical study population)

### Packed red blood cell transfusion

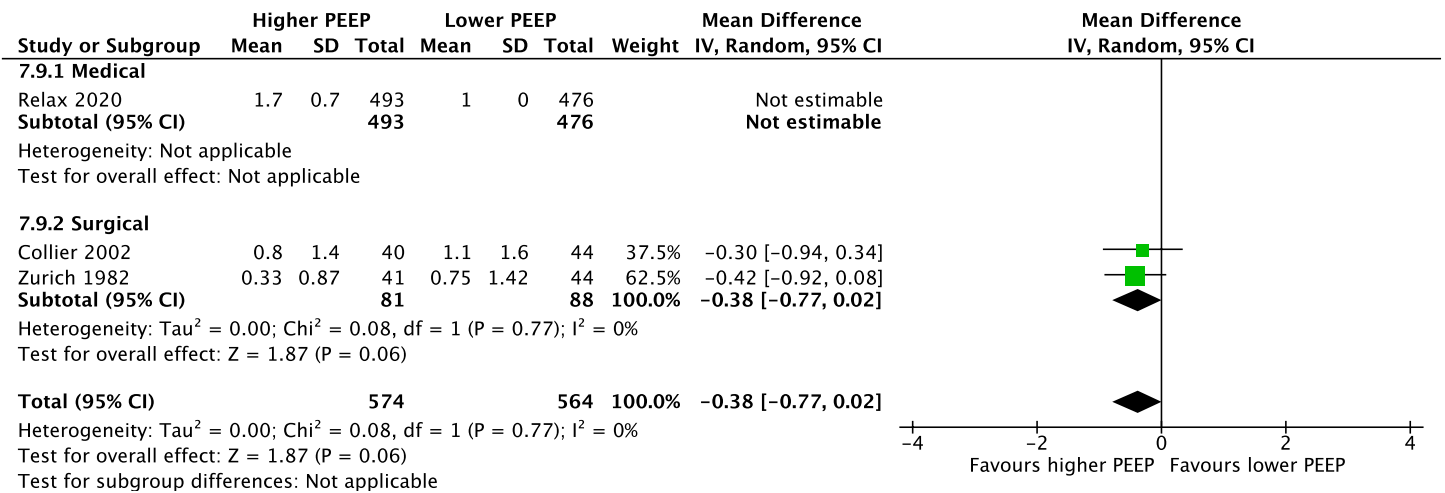

## Subgroup analysis (medical vs. surgical study population)

### Duration of ventilation

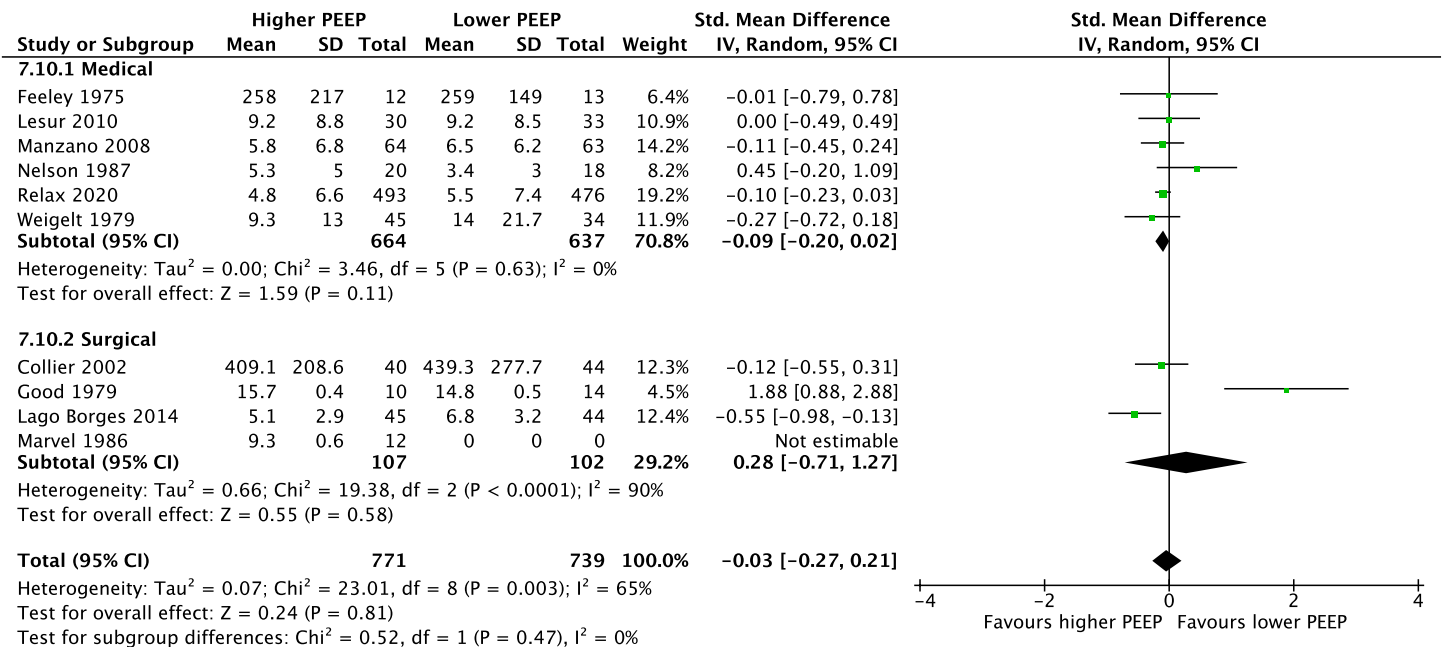

## Subgroup analysis (medical vs. surgical study population)

### Hospital stay

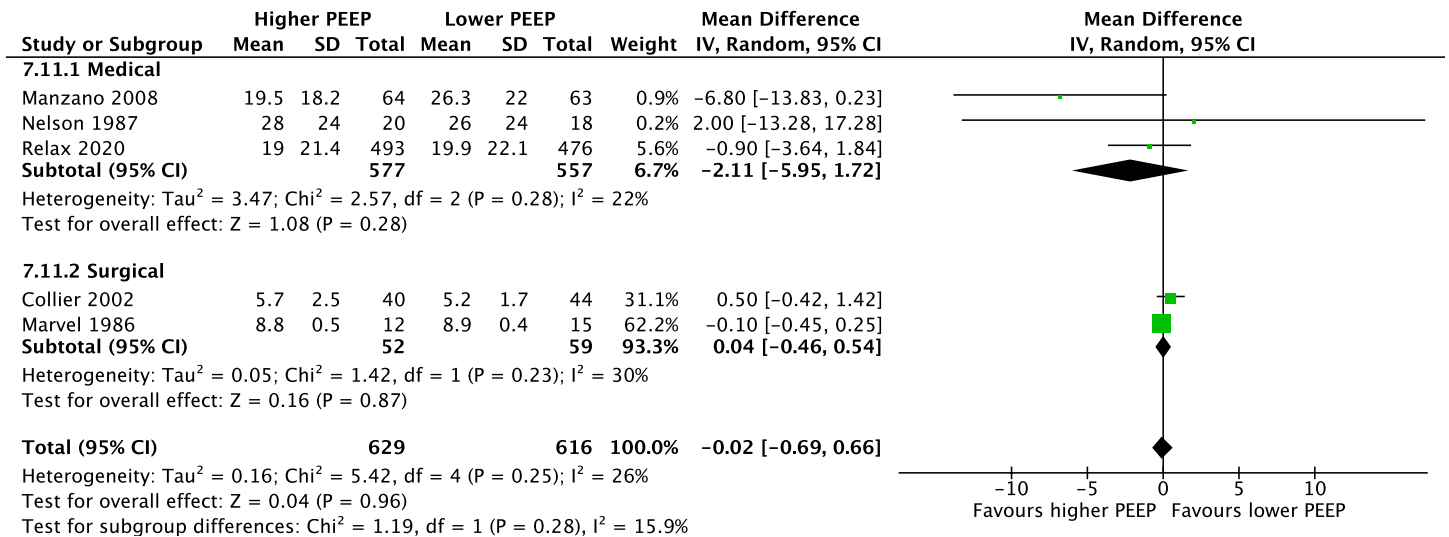

## Subgroup analysis (medical vs. surgical study population)

### ICU mortality

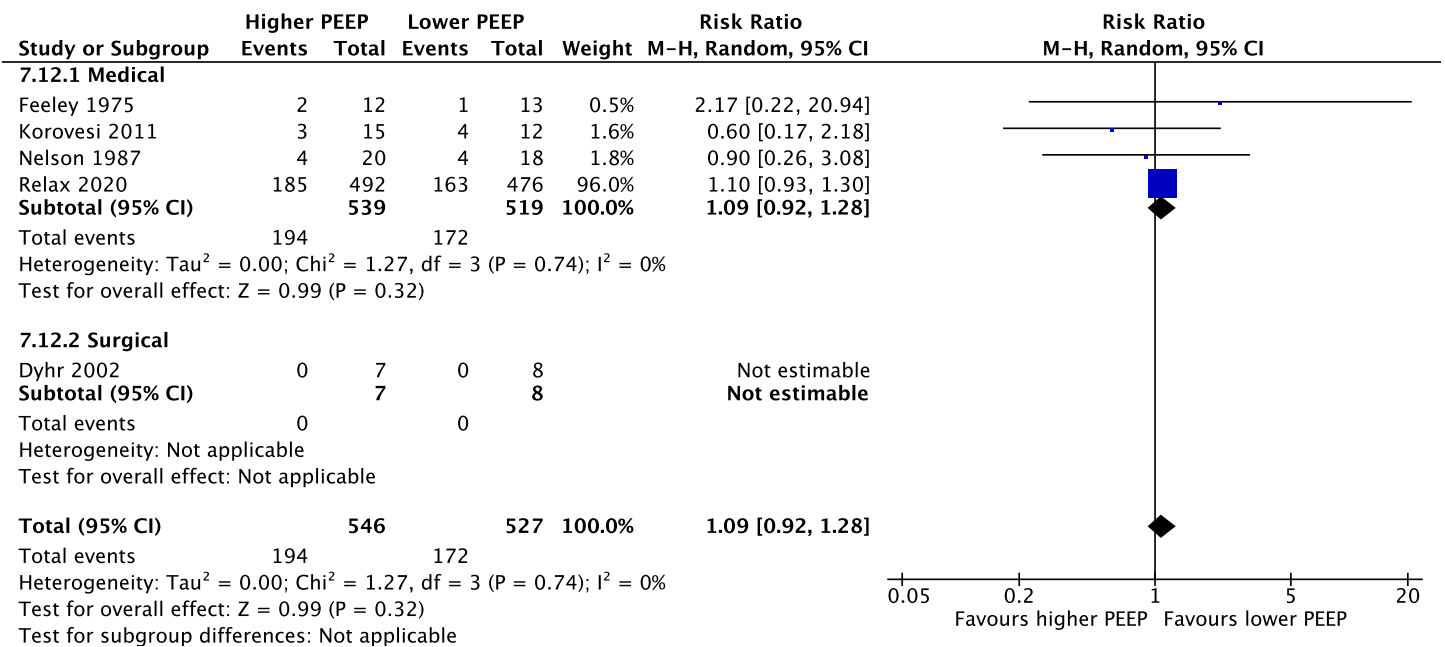



## Subgroup analysis (ZEEP vs. lower PEEP)

### Hospital mortality

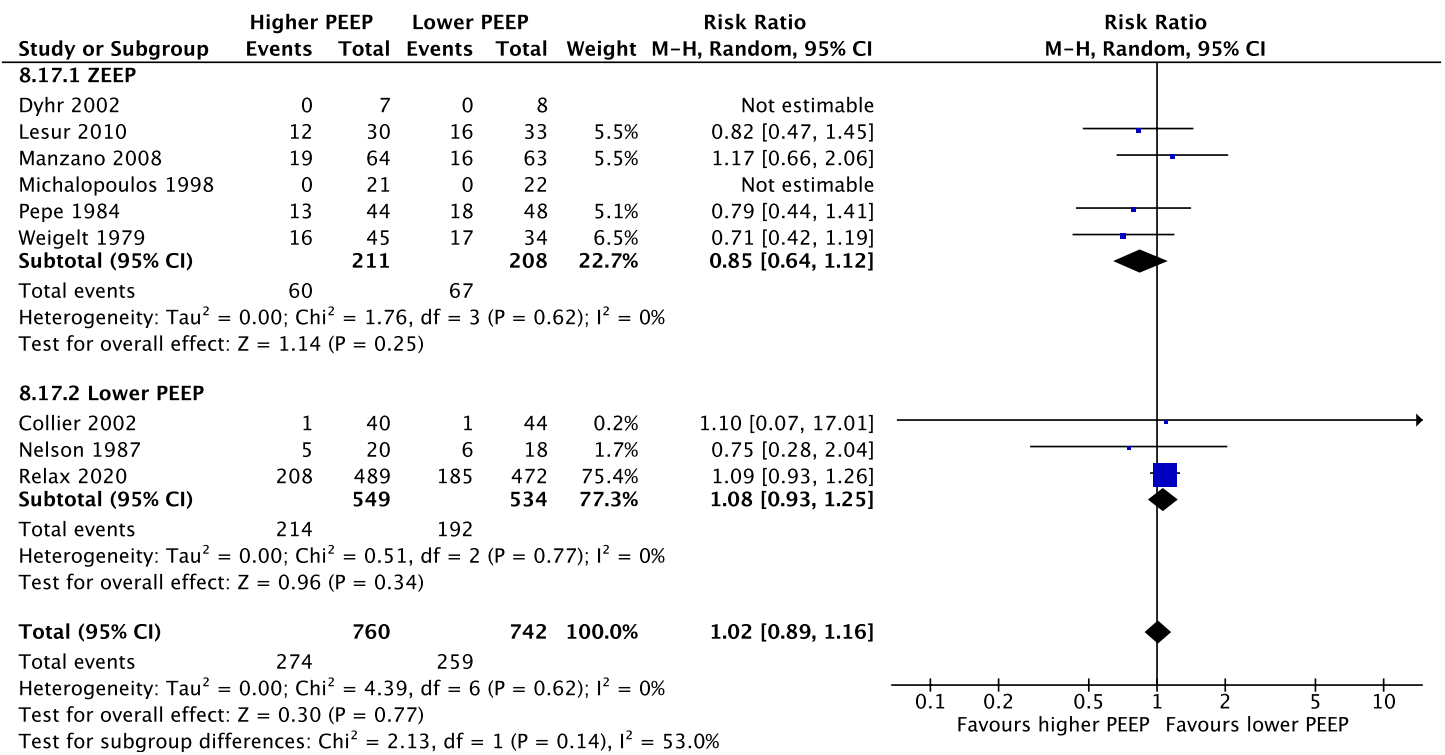

## Subgroup analysis (ZEEP vs. lower PEEP)

### PaO<sub>2</sub>/FiO<sub>2</sub>

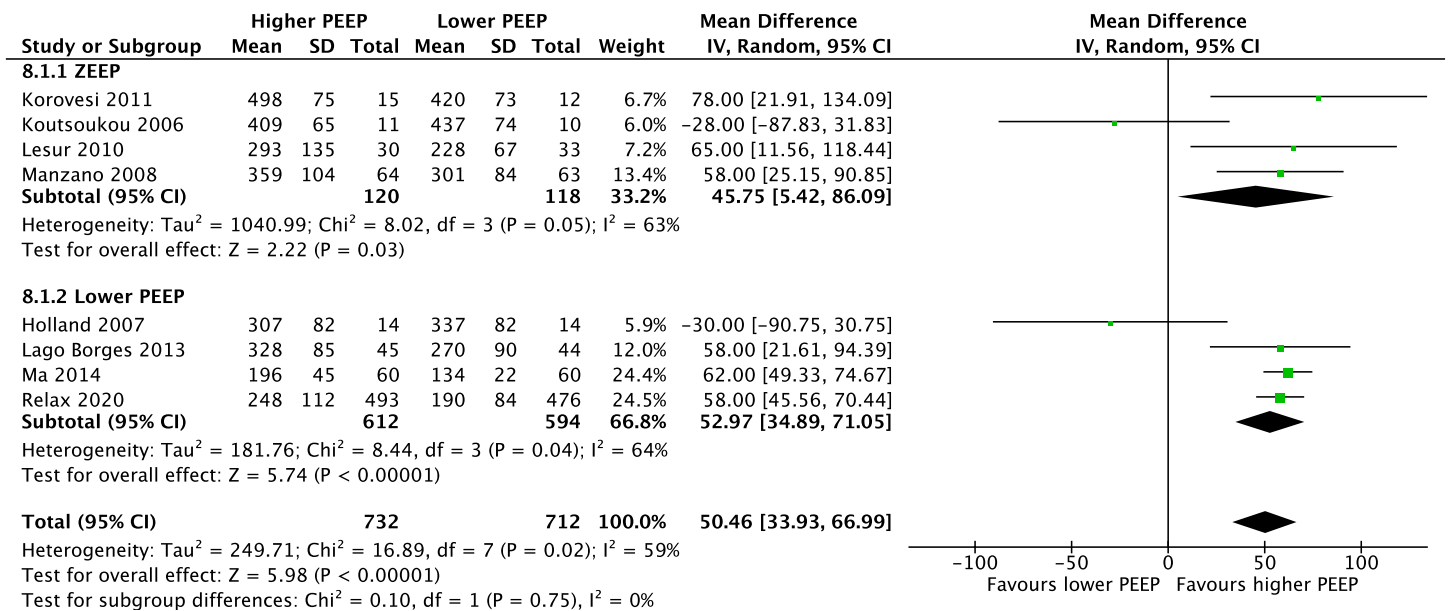

## Subgroup analysis (ZEEP vs. lower PEEP)

### A-aDO<sub>2</sub>

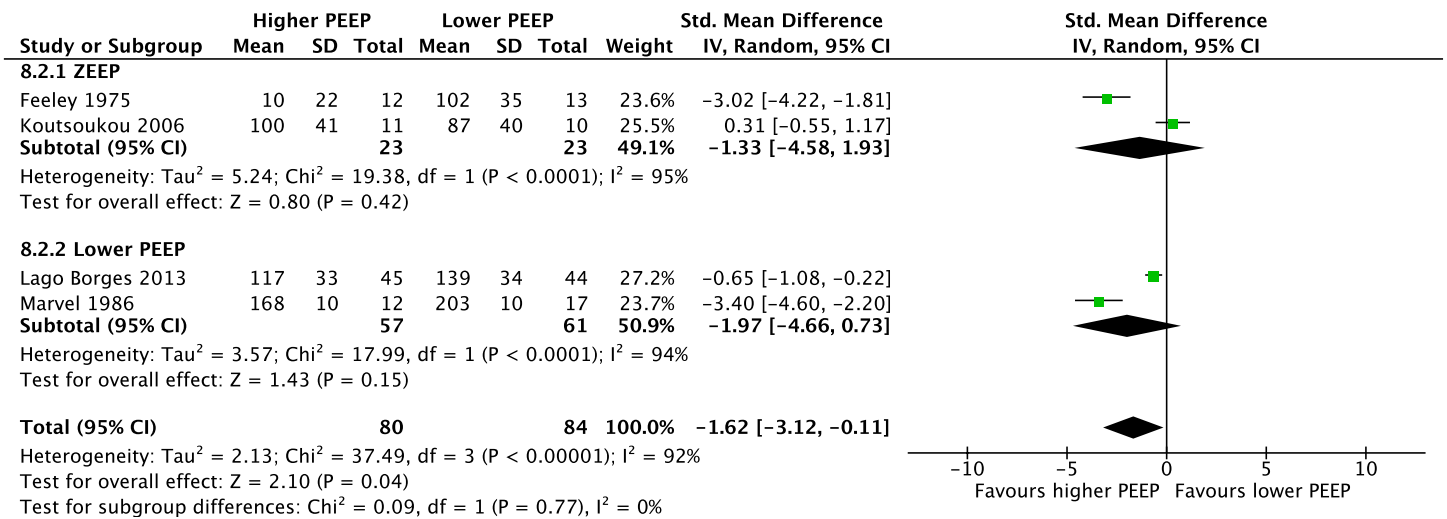

## Subgroup analysis (ZEEP vs. lower PEEP)

### Compliance

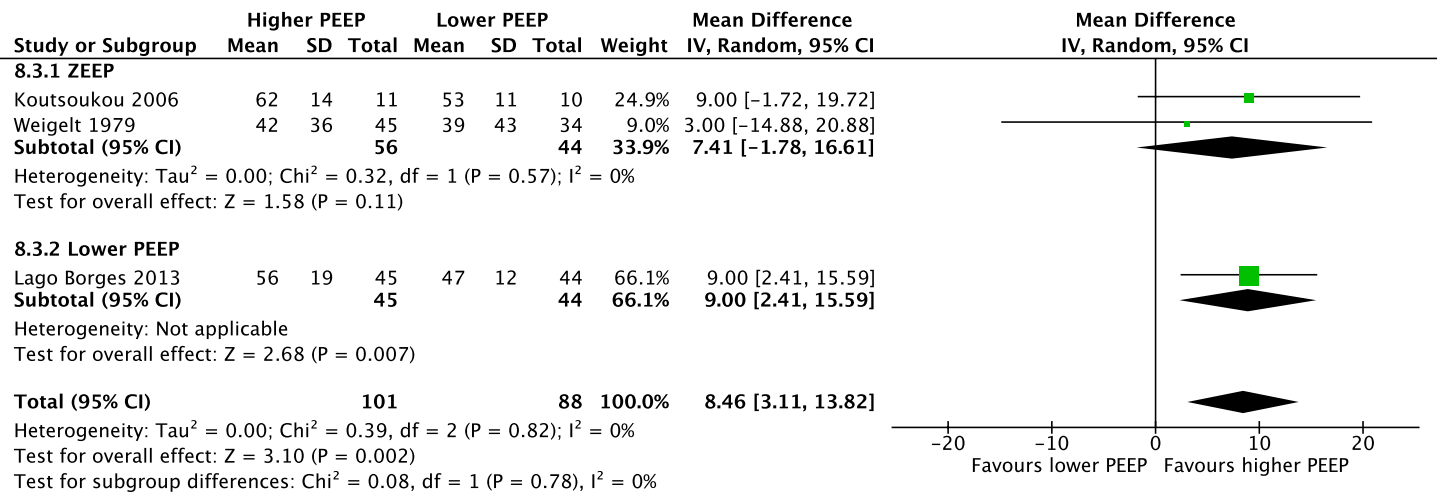

## Subgroup analysis (ZEEP vs. lower PEEP)

### Hypoxemia

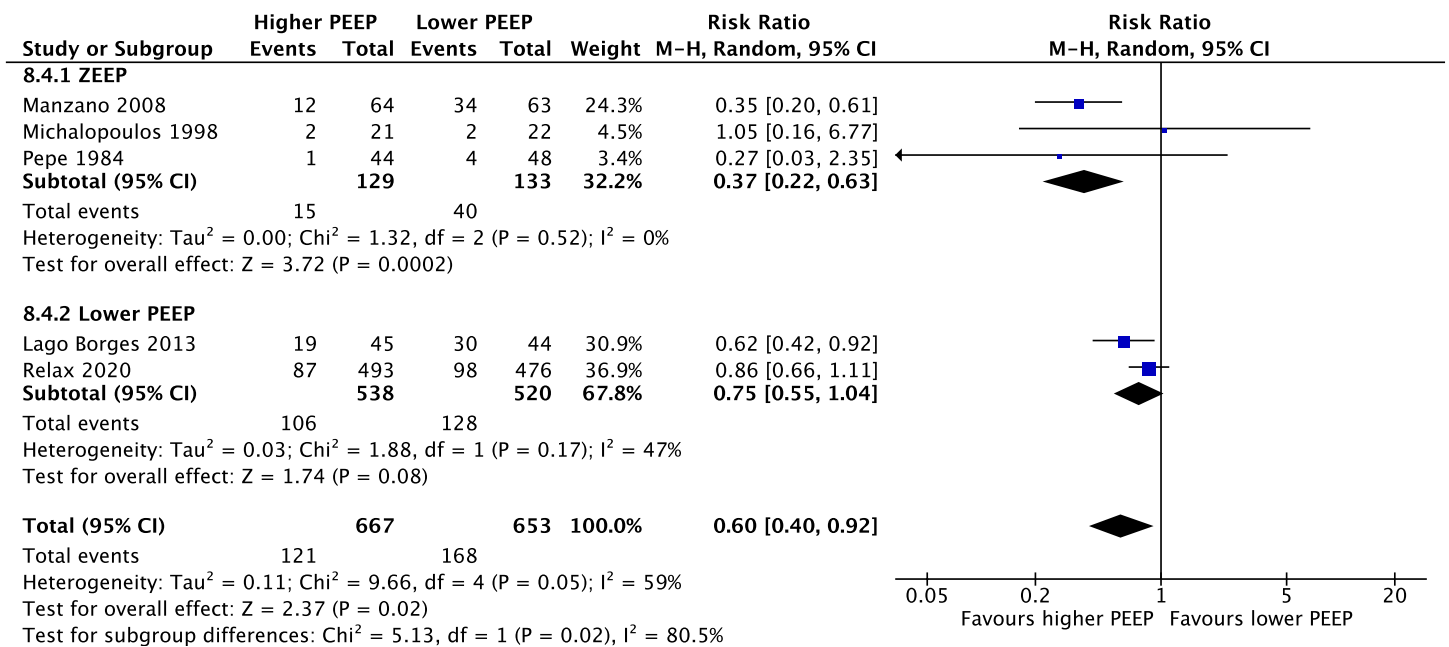

## Subgroup analysis (ZEEP vs. lower PEEP)

### Atelectasis

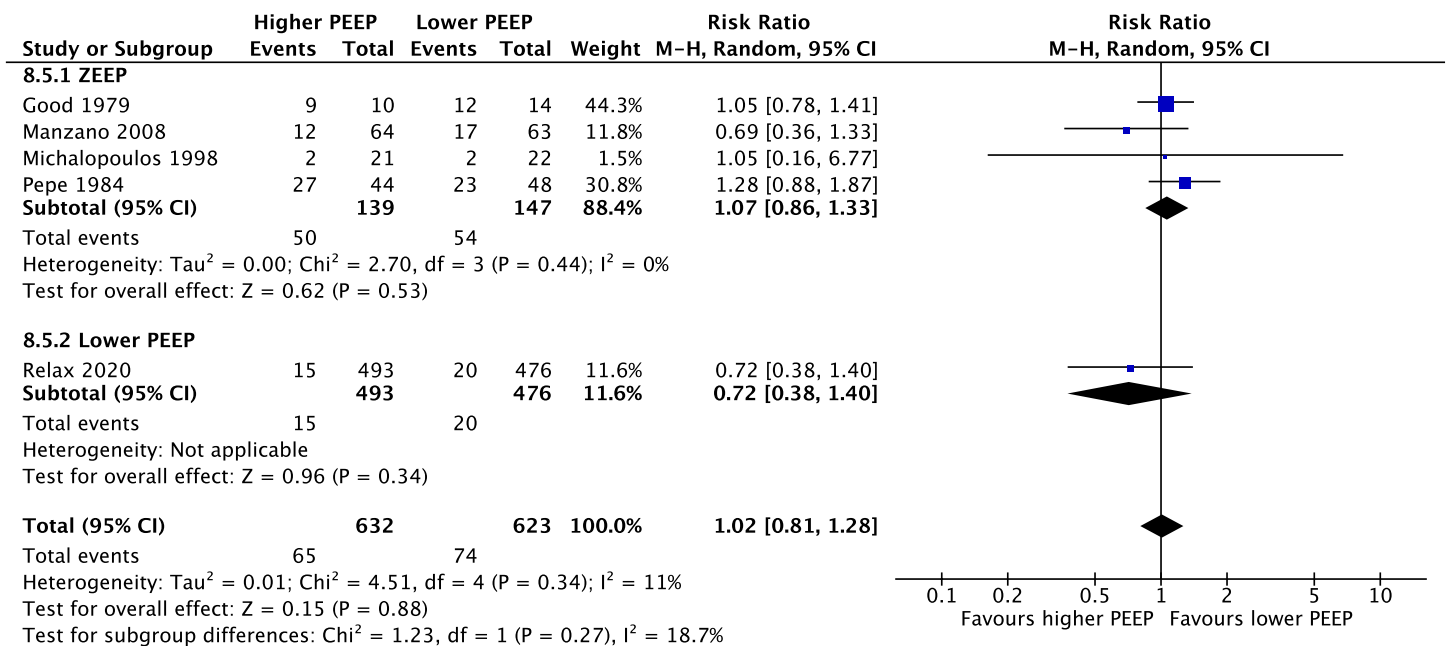

## Subgroup analysis (ZEEP vs. lower PEEP)

### Barotrauma

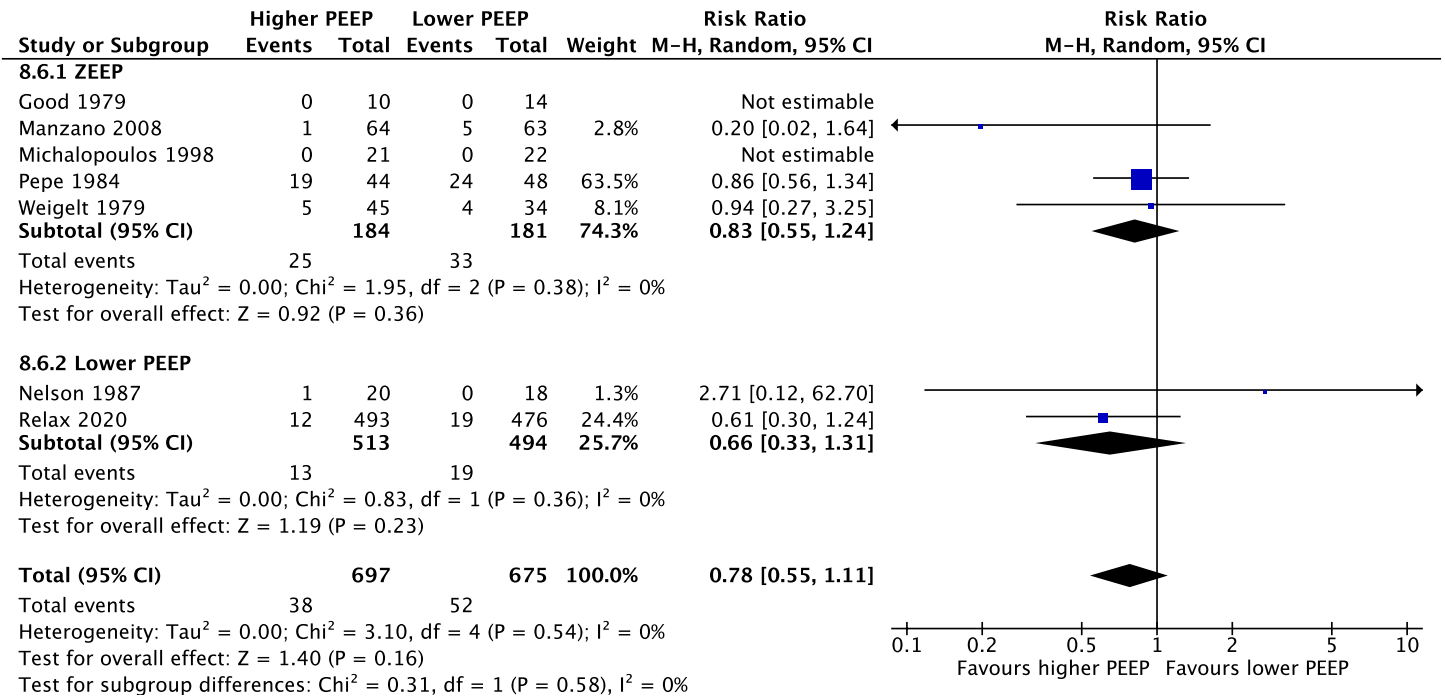

## Subgroup analysis (ZEEP vs. lower PEEP)

### Ventilator-associated pneumonia

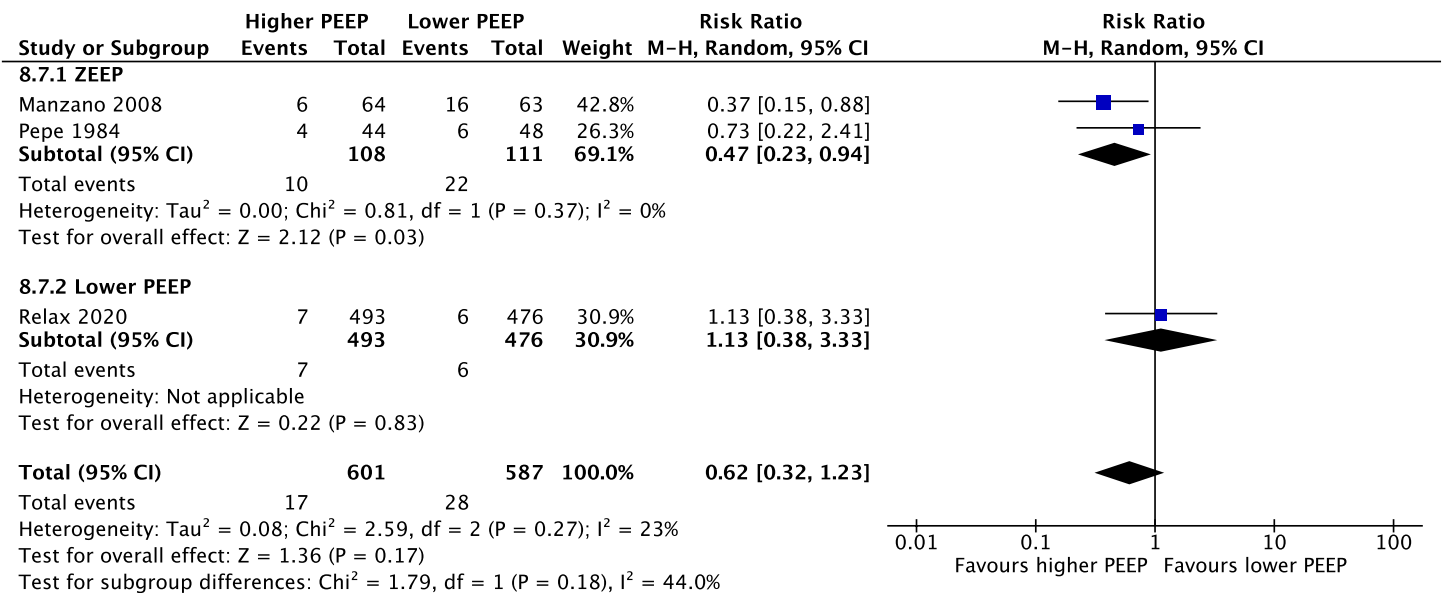



## Subgroup analysis (ZEEP vs. lower PEEP)

### ARDS

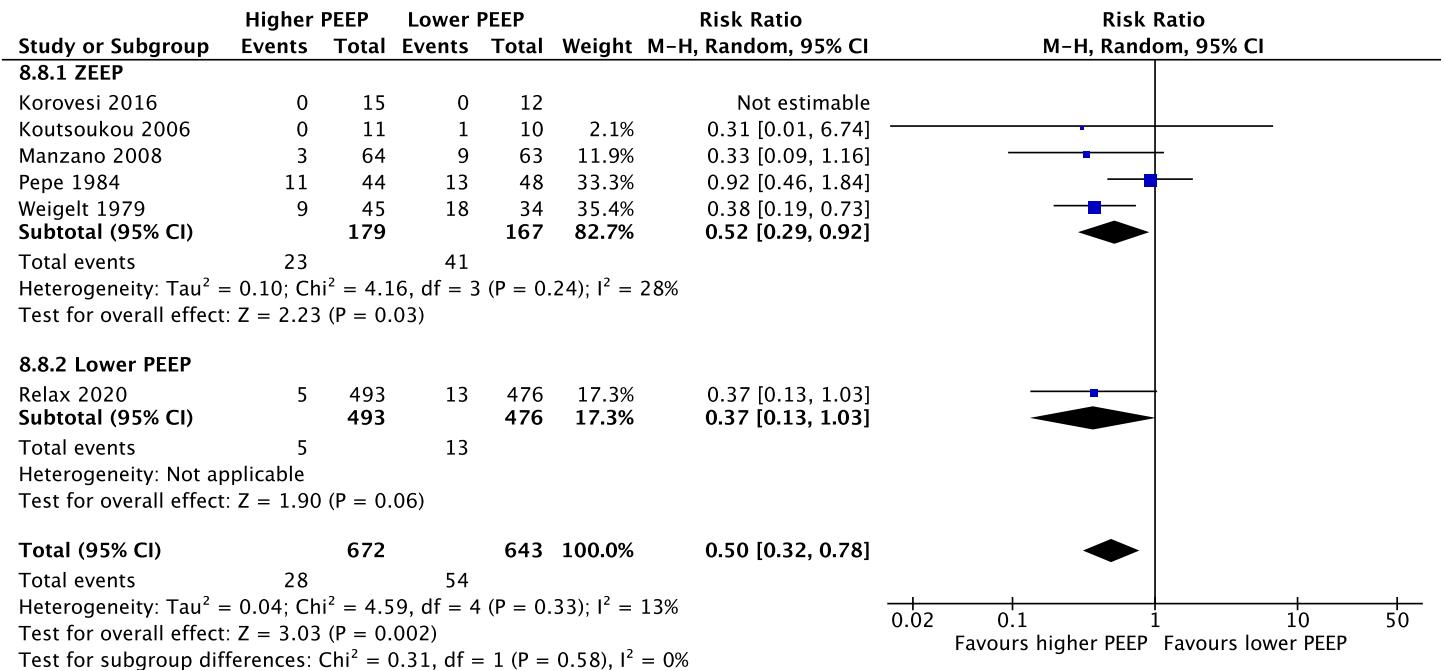

## Subgroup analysis (ZEEP vs. lower PEEP)

### Cardiac index

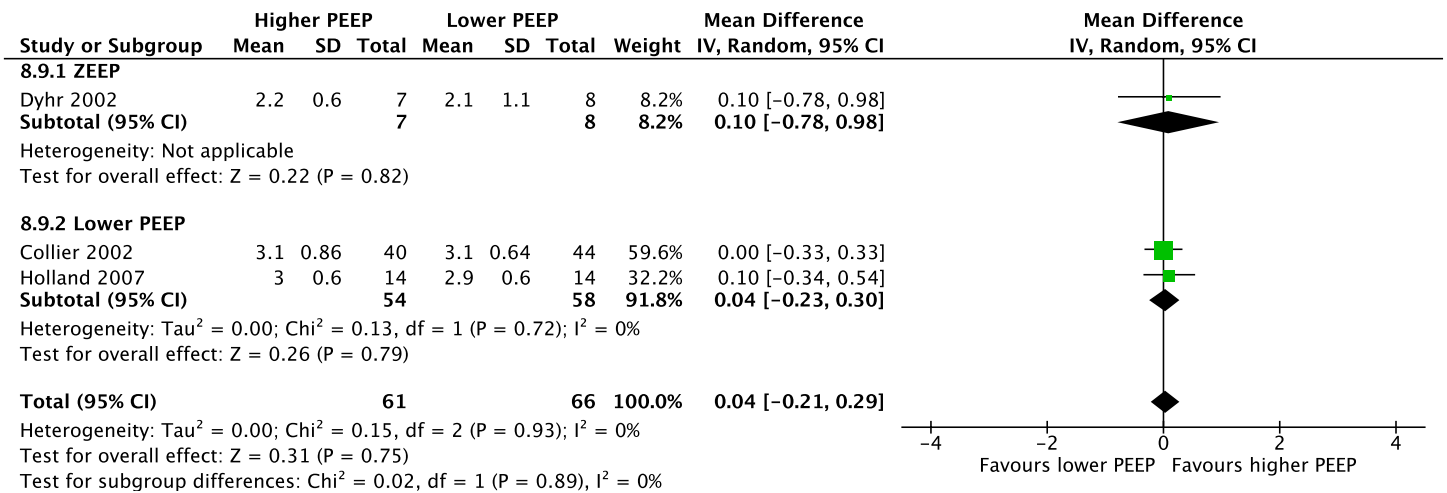

## Subgroup analysis (ZEEP vs. lower PEEP)

### Central venous pressure

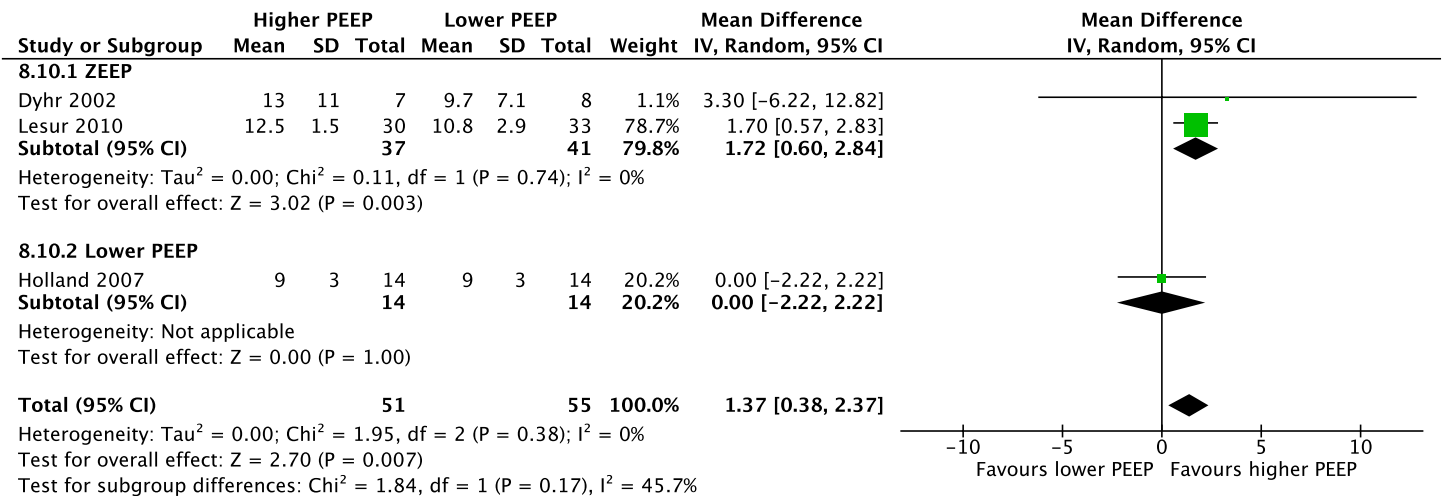

## Subgroup analysis (ZEEP vs. lower PEEP)

### Postoperative bleeding

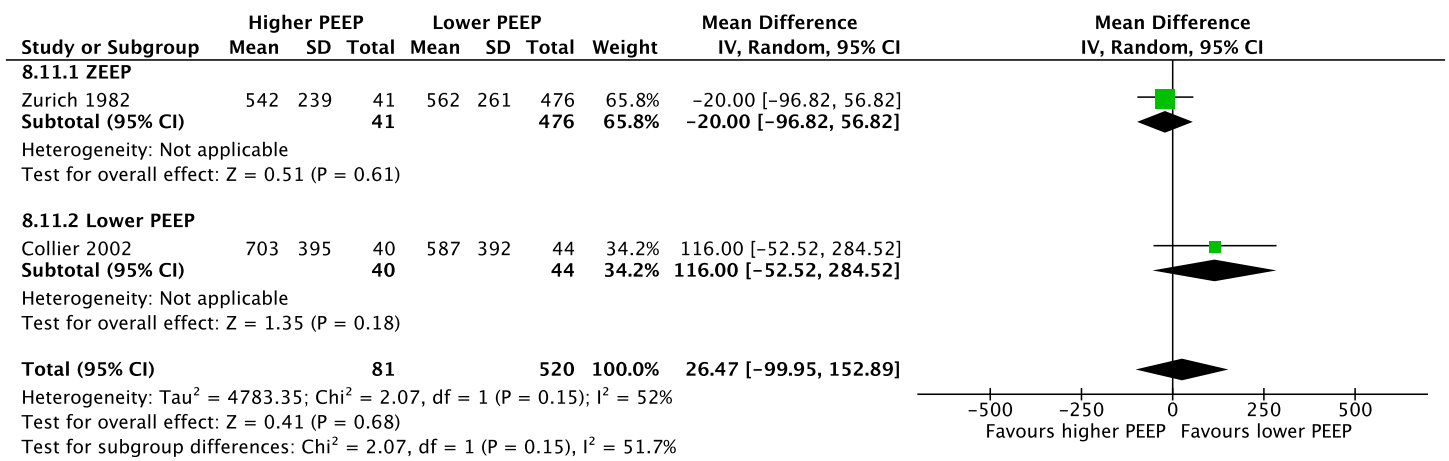

## Subgroup analysis (ZEEP vs. lower PEEP)

### Packed red blood cell transfusion

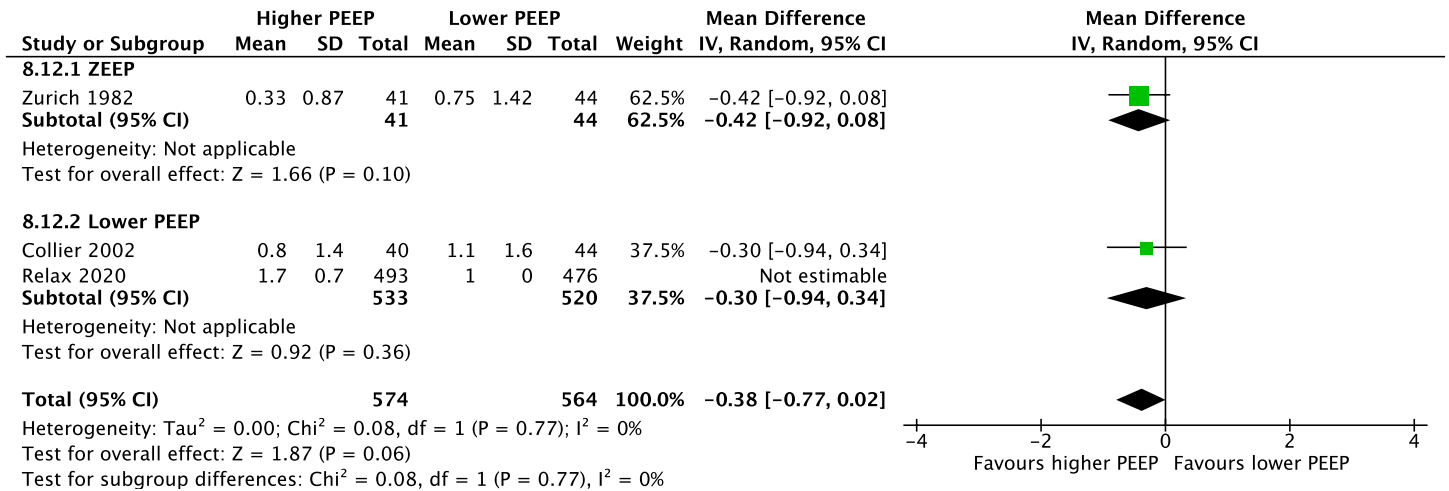

## Subgroup analysis (ZEEP vs. lower PEEP)

### Duration of ventilation

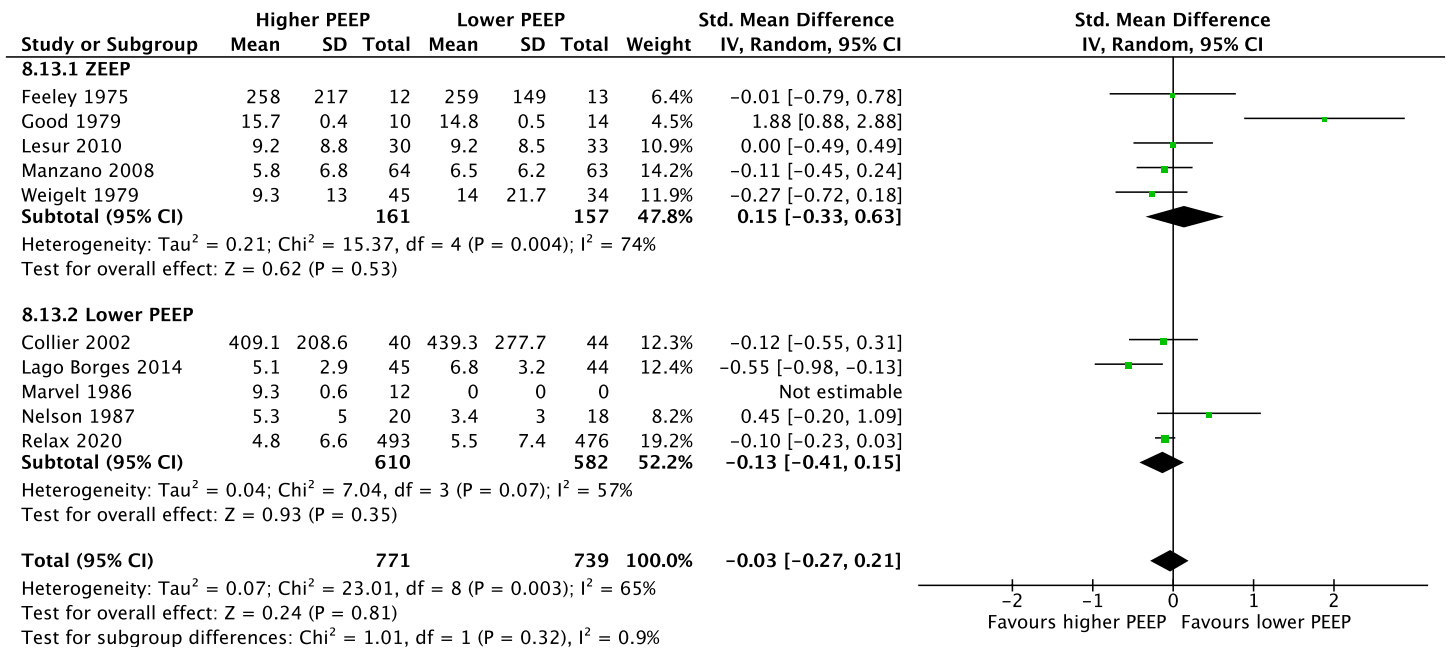

## Subgroup analysis (ZEEP vs. lower PEEP)

### ICU stay

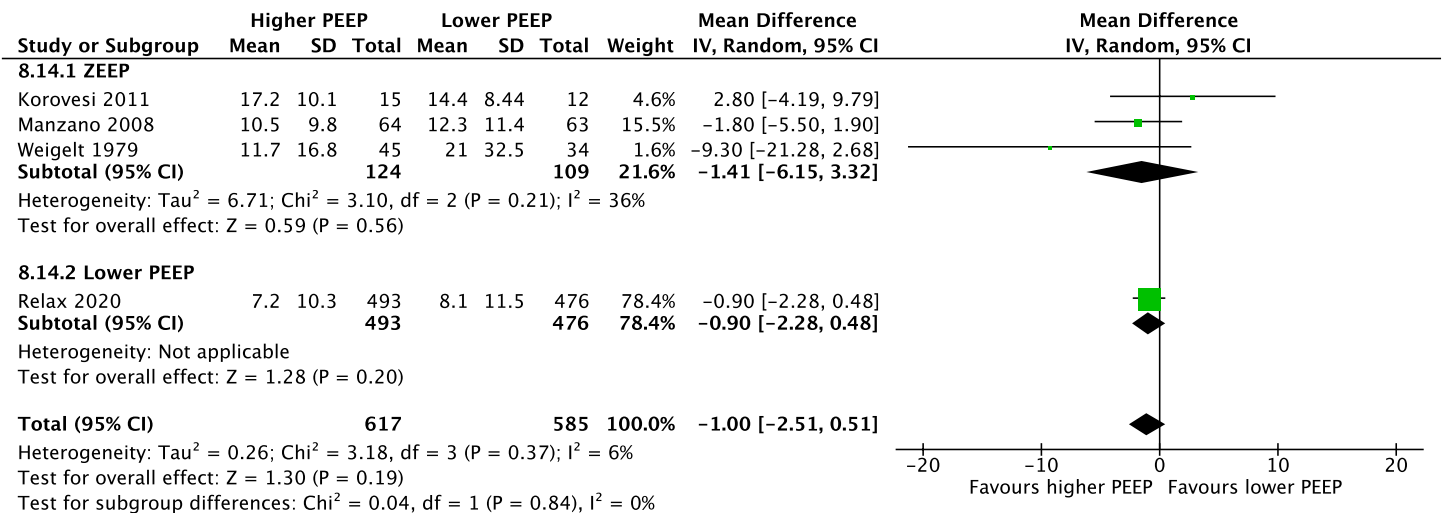

## Subgroup analysis (ZEEP vs. lower PEEP)

### Hospital stay

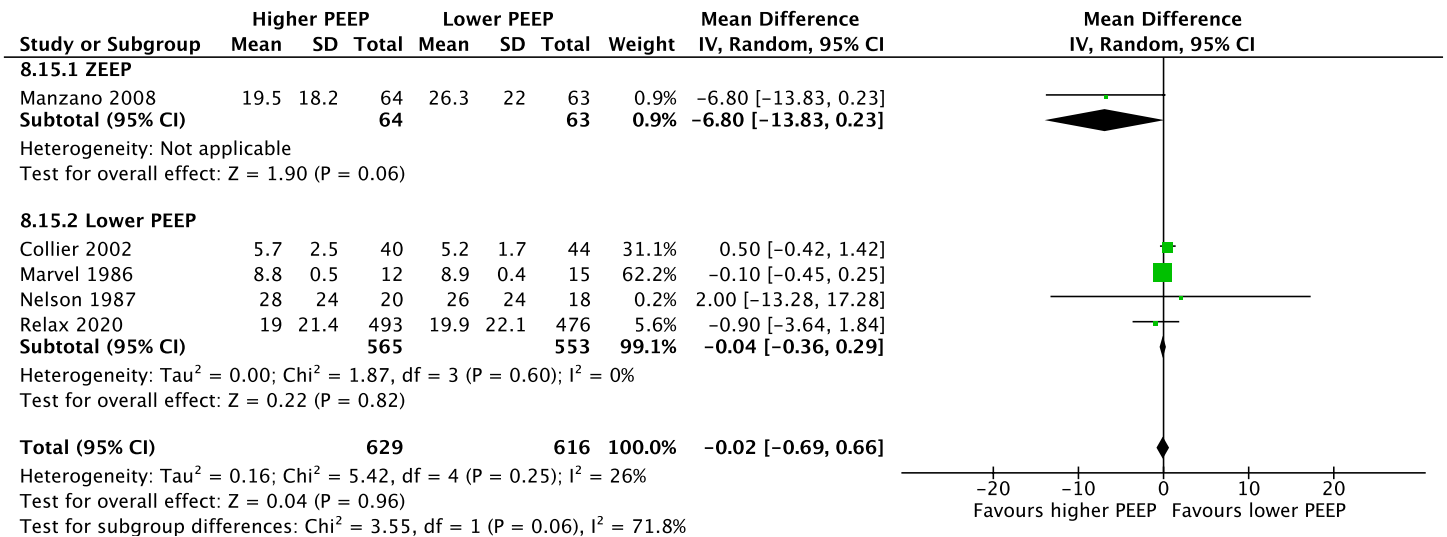



## Subgroup analysis (ZEEP vs. lower PEEP)

### ICU mortality

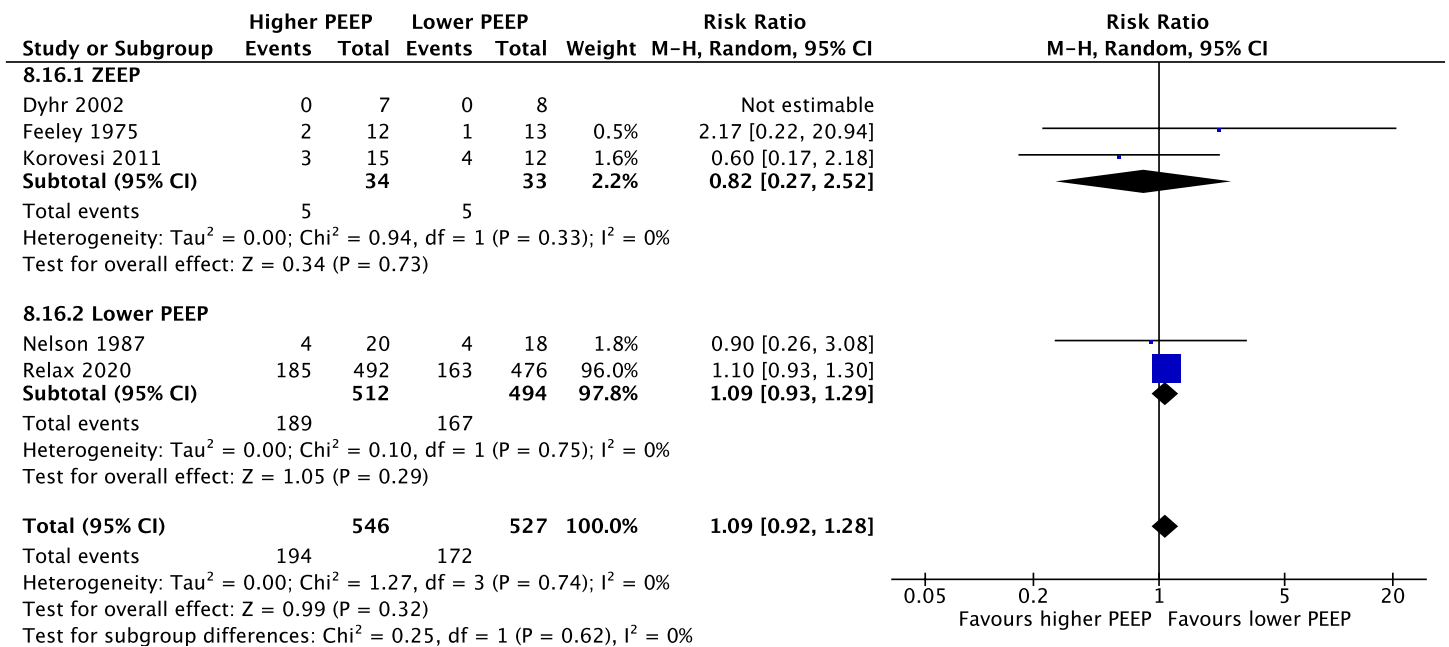

## Subgroup analysis (ZEEP vs. lower PEEP)

### 28-day mortality

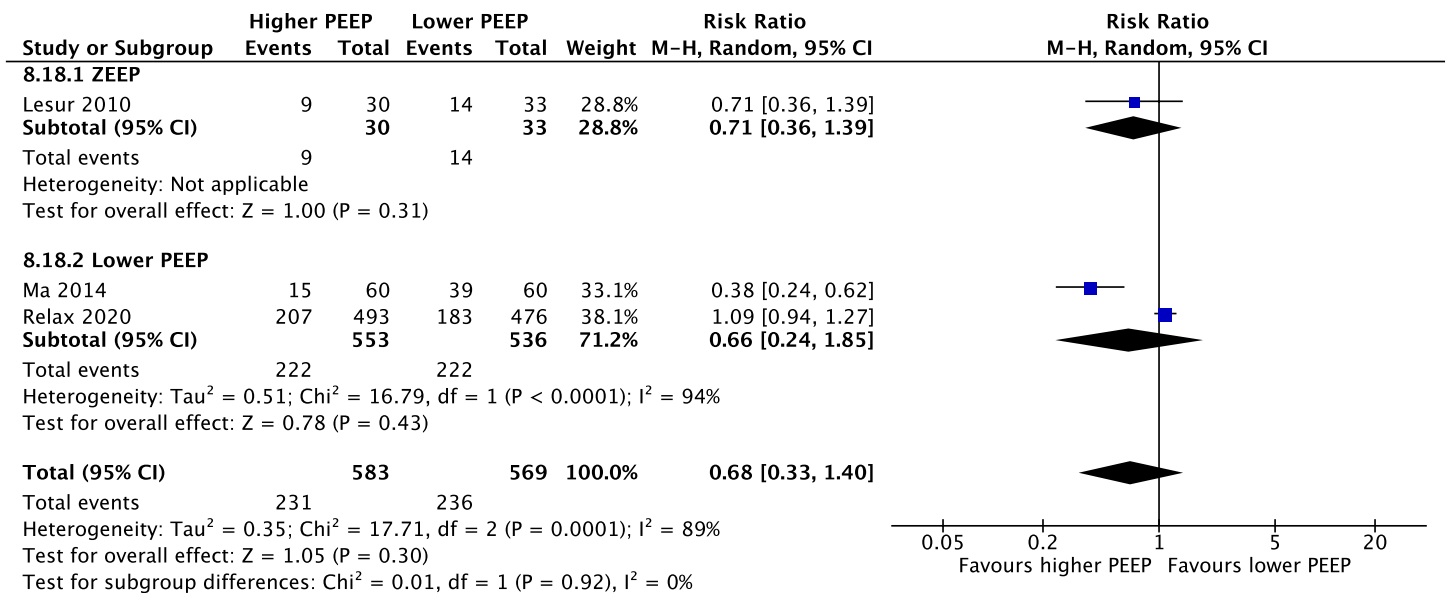

## Subgroup analysis (TV > 8 mL/kg vs. TV < 8 mL/kg)

### Hospital mortality

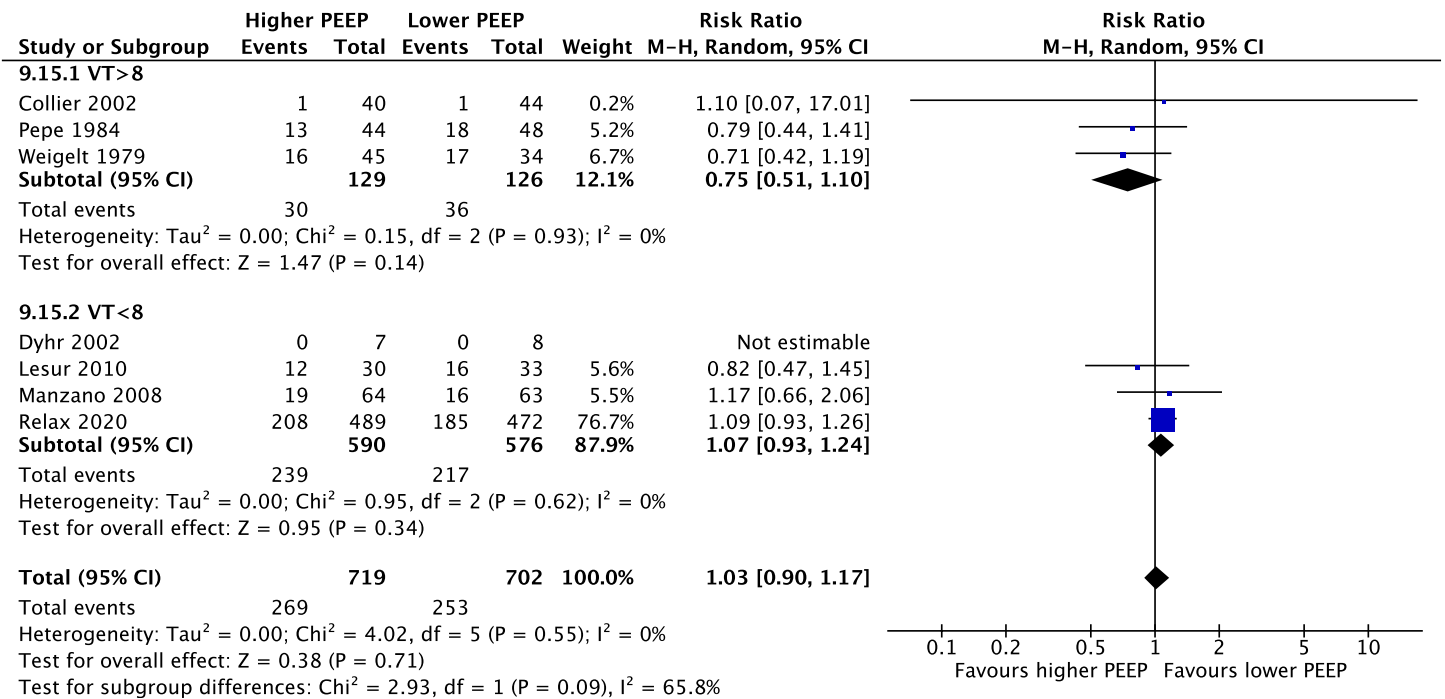

## Subgroup analysis (TV > 8 mL/kg vs. TV < 8 mL/kg)

### A-aDO<sub>2</sub>

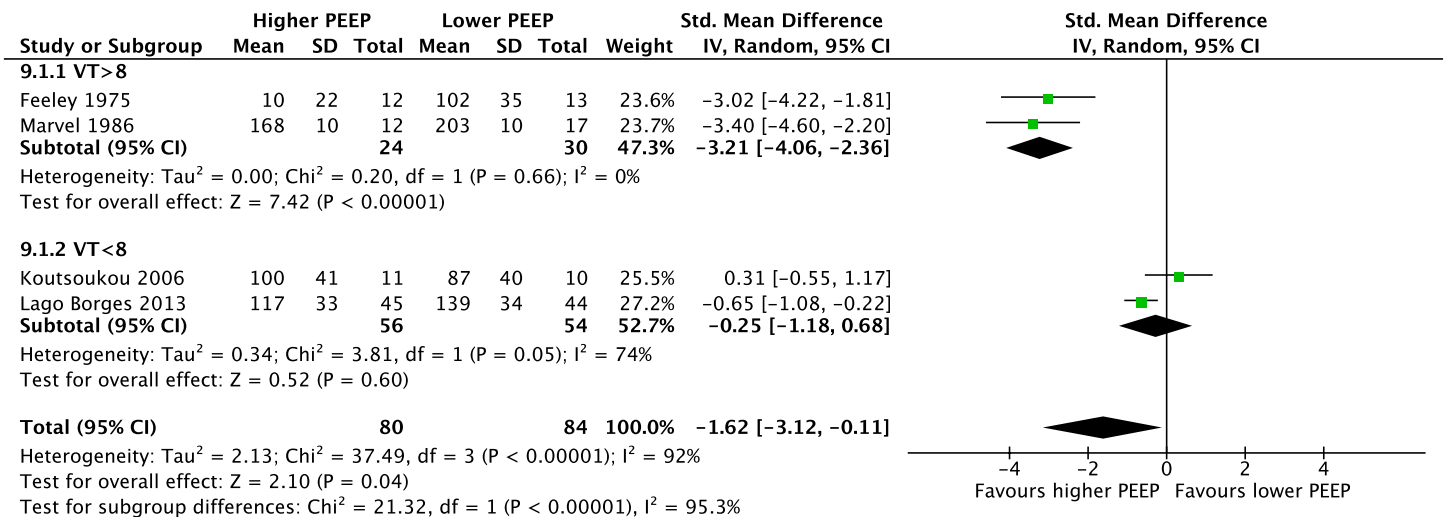

## Subgroup analysis (TV > 8 mL/kg vs. TV < 8 mL/kg)

### Compliance

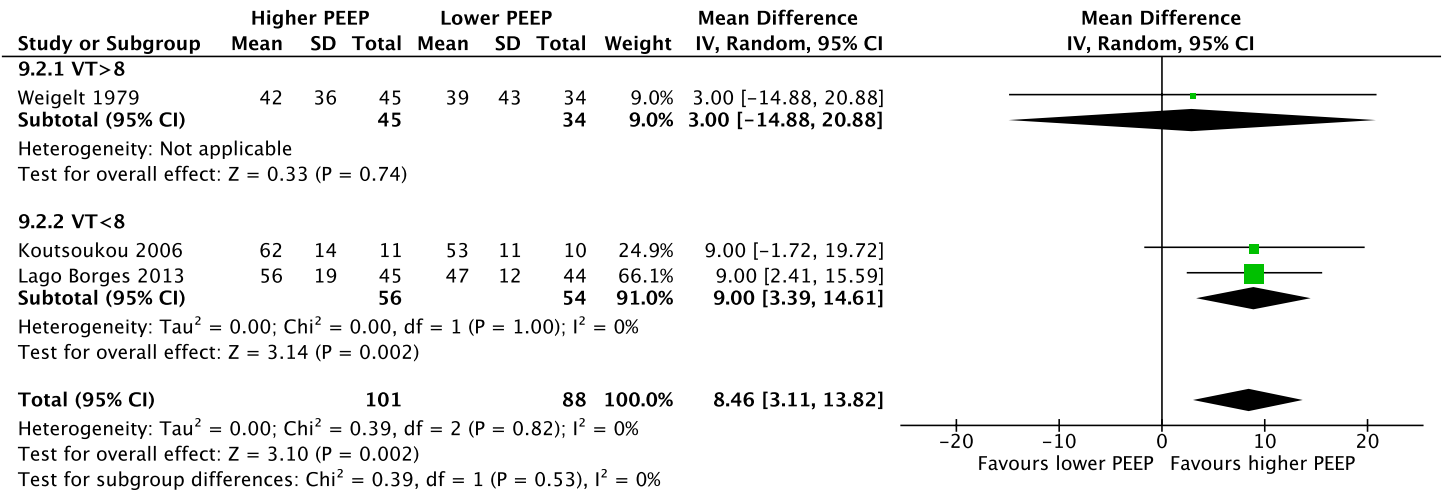

## Subgroup analysis (TV > 8 mL/kg vs. TV < 8 mL/kg)

### Hypoxemia

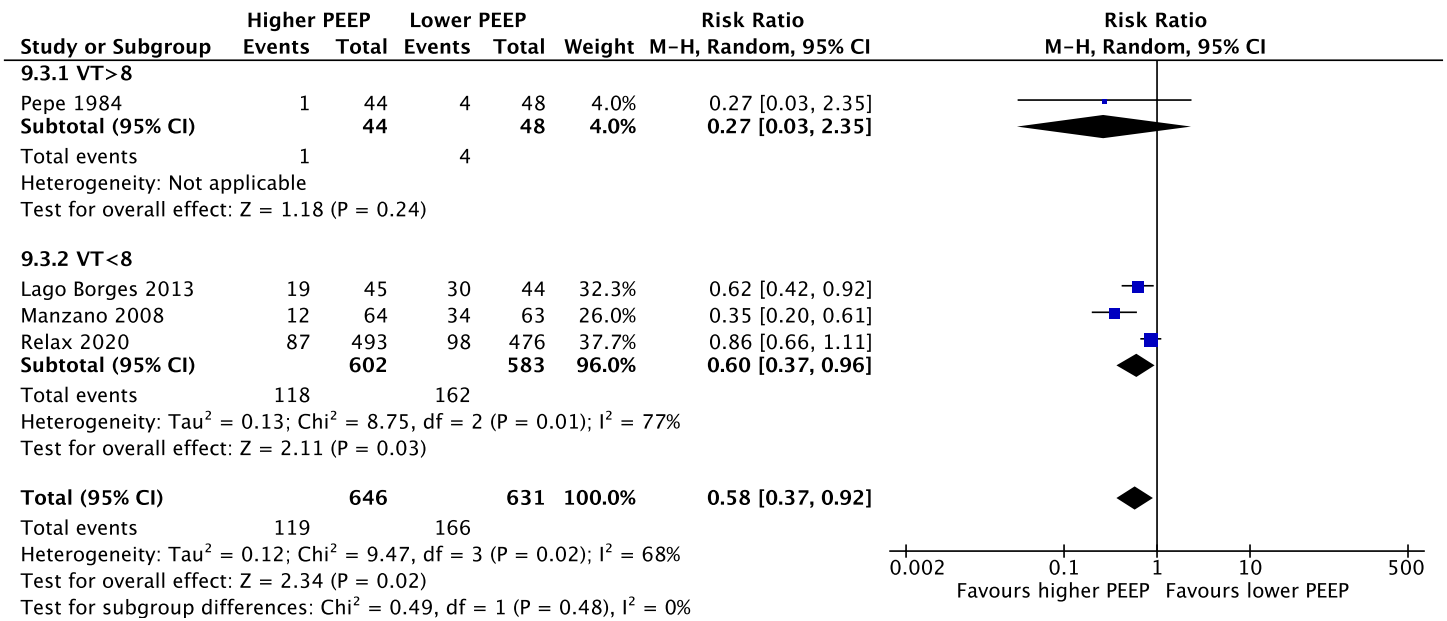

## Subgroup analysis (TV > 8 mL/kg vs. TV < 8 mL/kg)

### Atelectasis

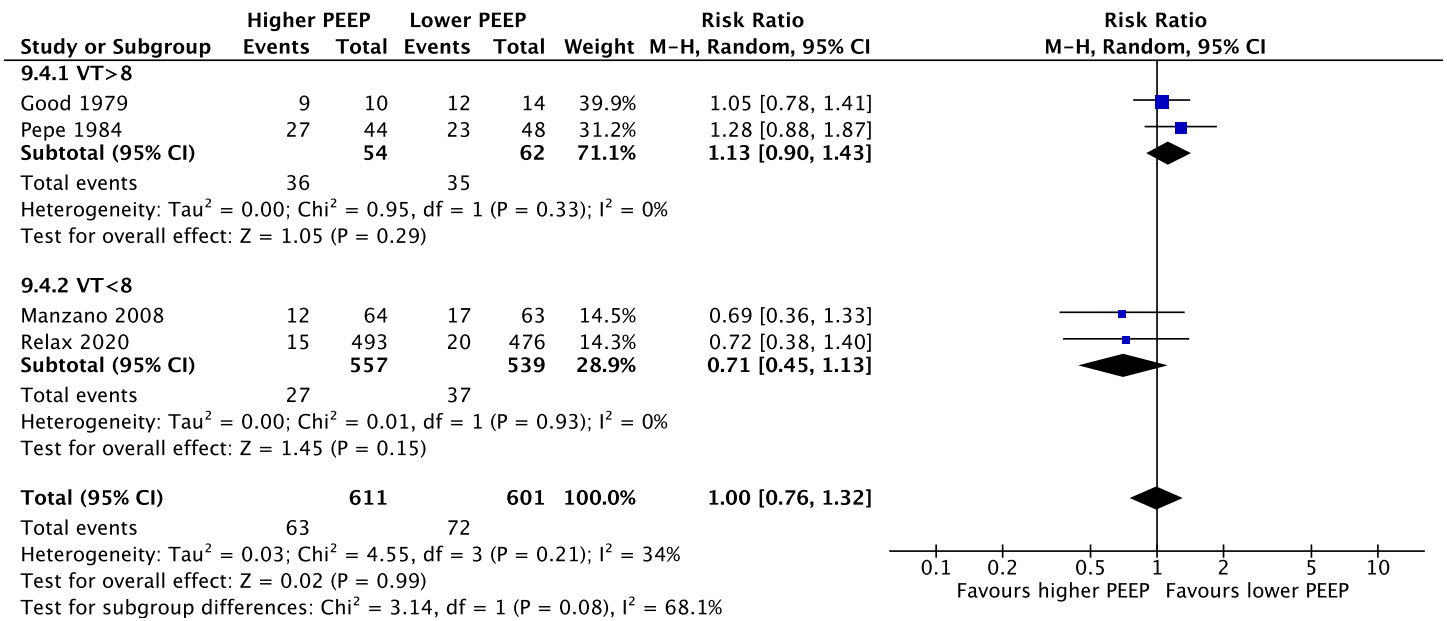

## Subgroup analysis (TV > 8 mL/kg vs. TV < 8 mL/kg)

### Barotrauma

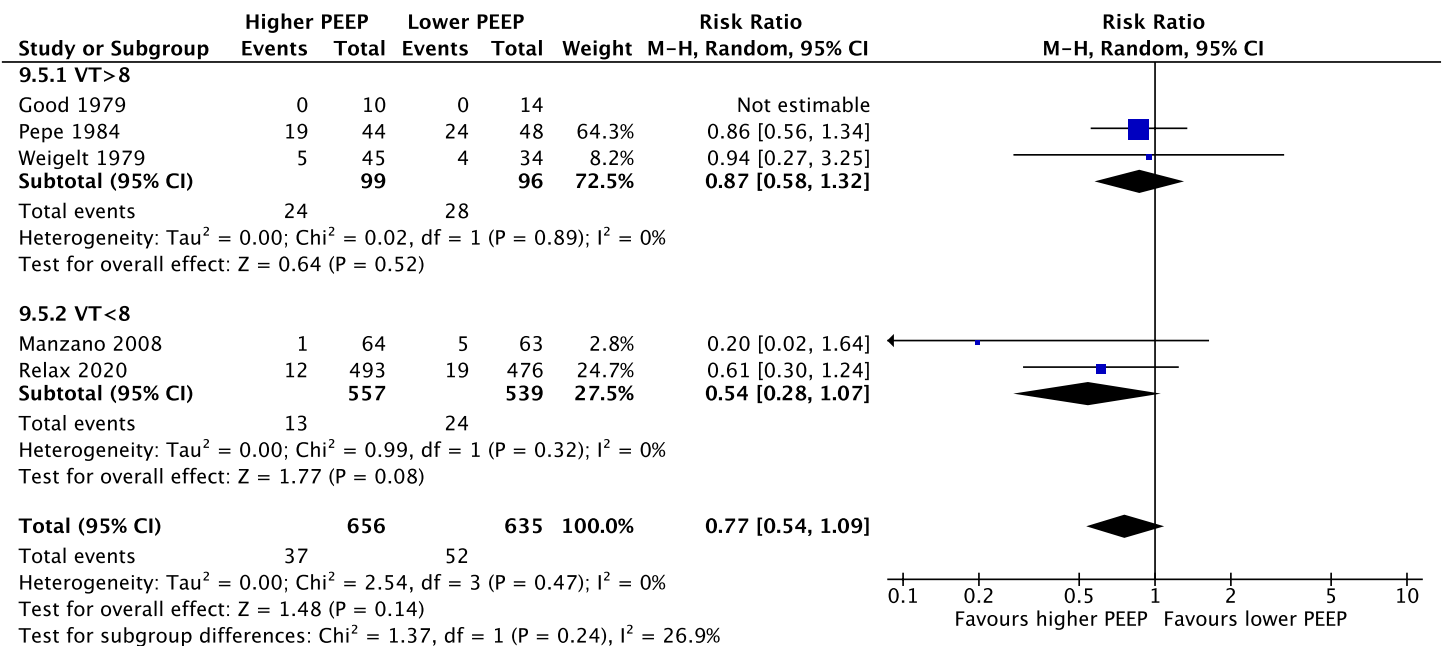



## Subgroup analysis (TV > 8 mL/kg vs. TV < 8 mL/kg)

### Ventilator-associated pneumonia

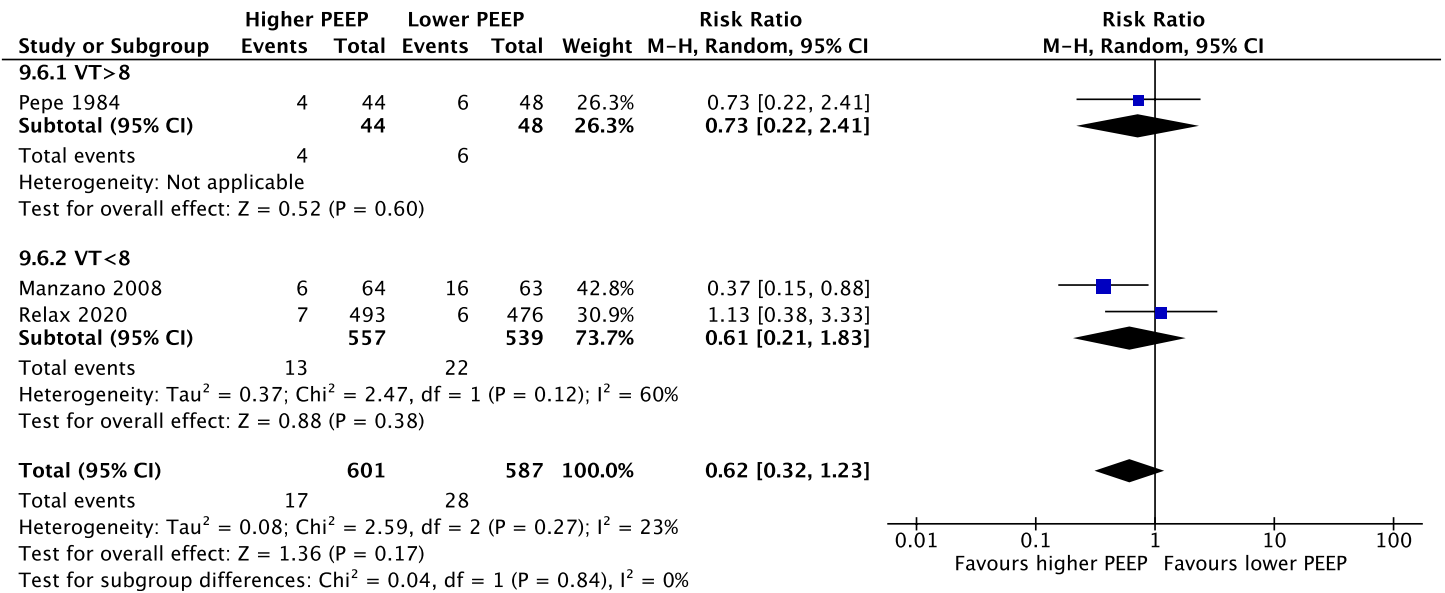

## Subgroup analysis (TV > 8 mL/kg vs. TV < 8 mL/kg)

### ARDS

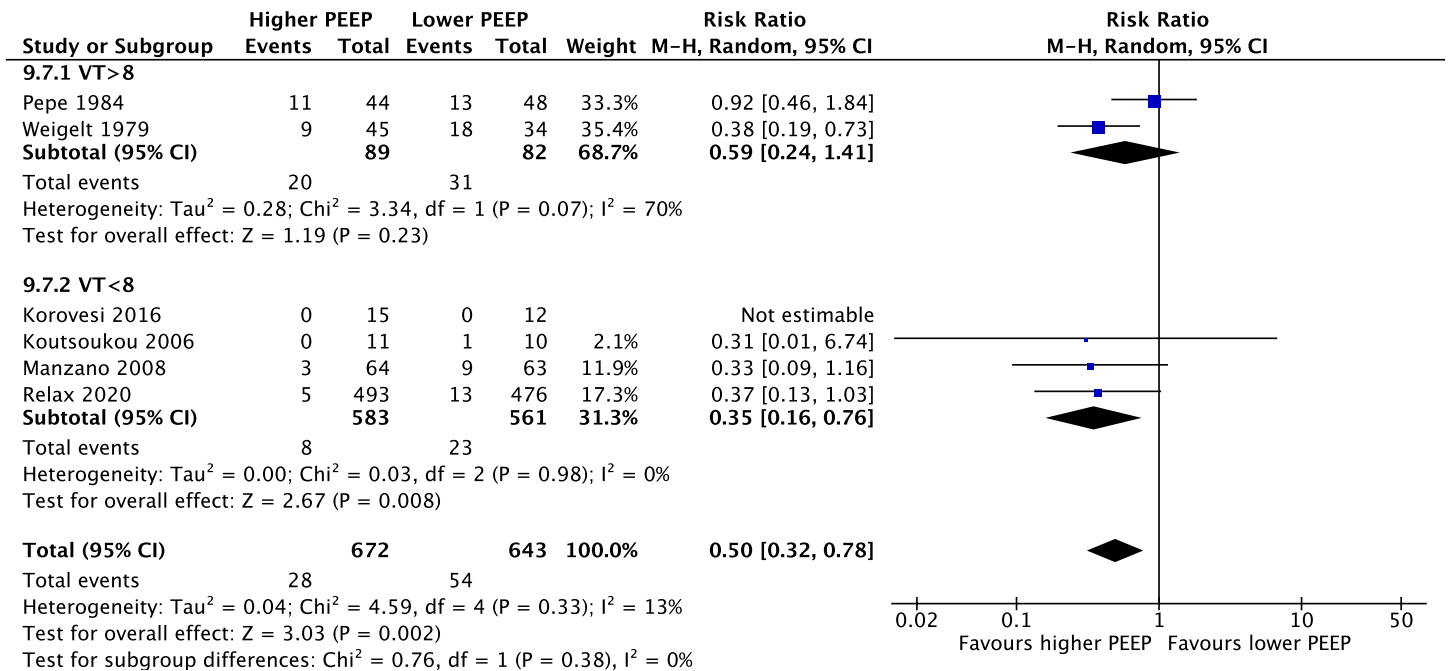

## Subgroup analysis (TV > 8 mL/kg vs. TV < 8 mL/kg)

### Hypotension

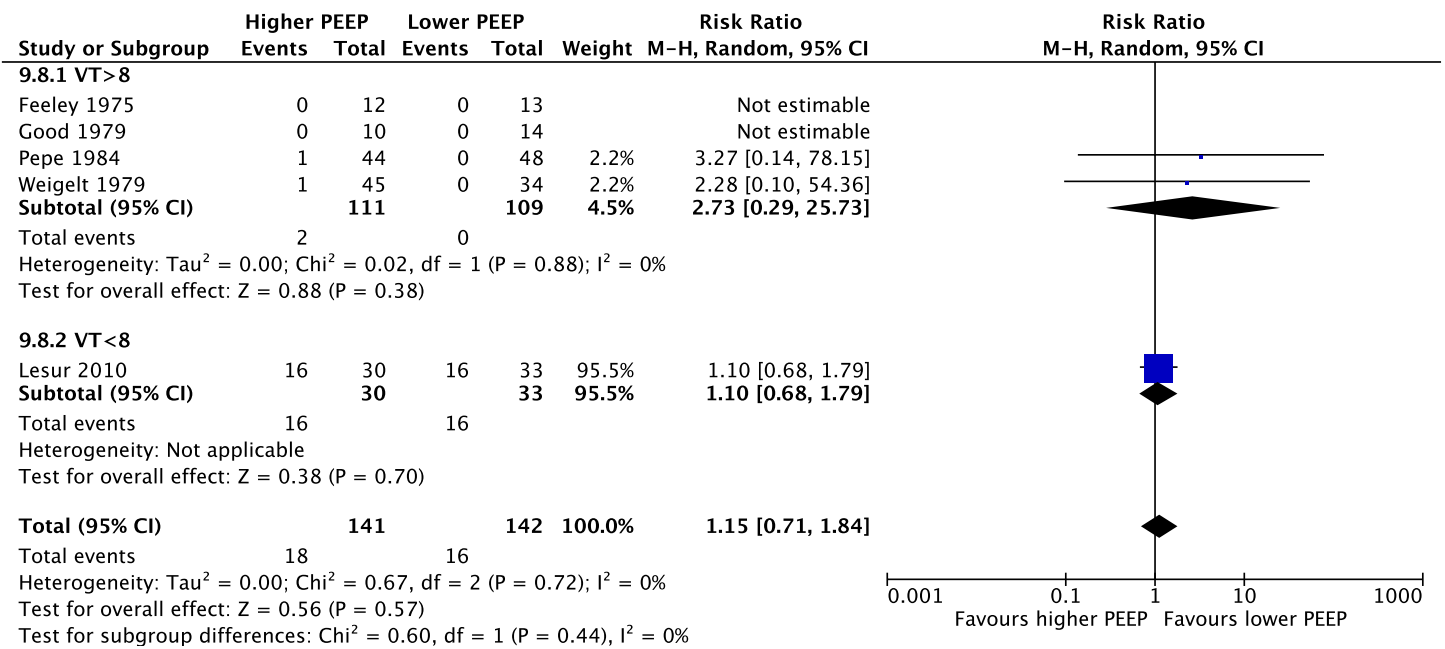

## Subgroup analysis (TV > 8 mL/kg vs. TV < 8 mL/kg)

### Cardiac index

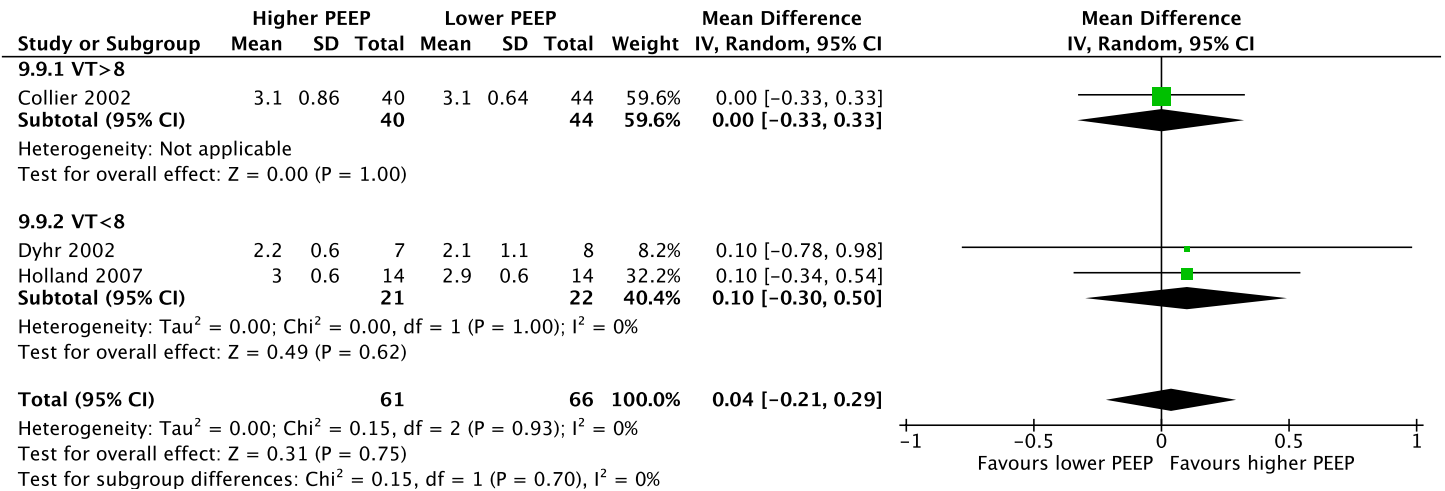

## Subgroup analysis (TV > 8 mL/kg vs. TV < 8 mL/kg)

### Duration of ventilation

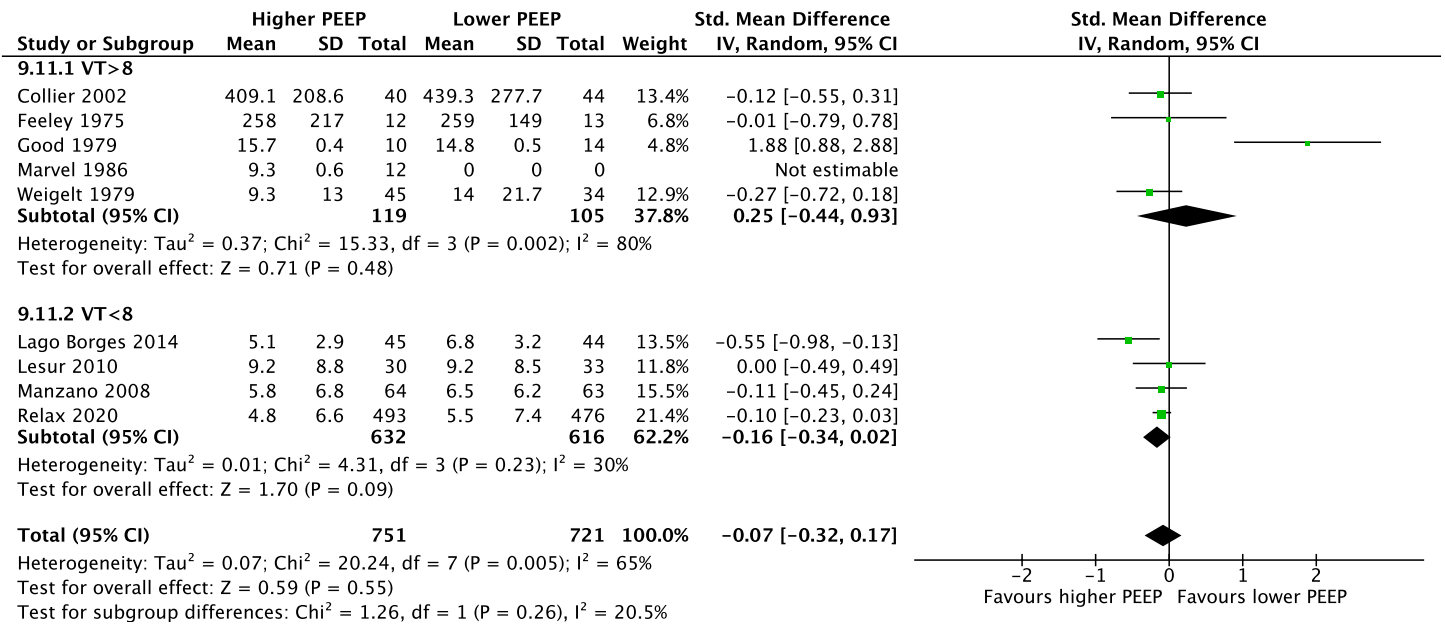

## Subgroup analysis (TV > 8 mL/kg vs. TV < 8 mL/kg)

### ICU stay

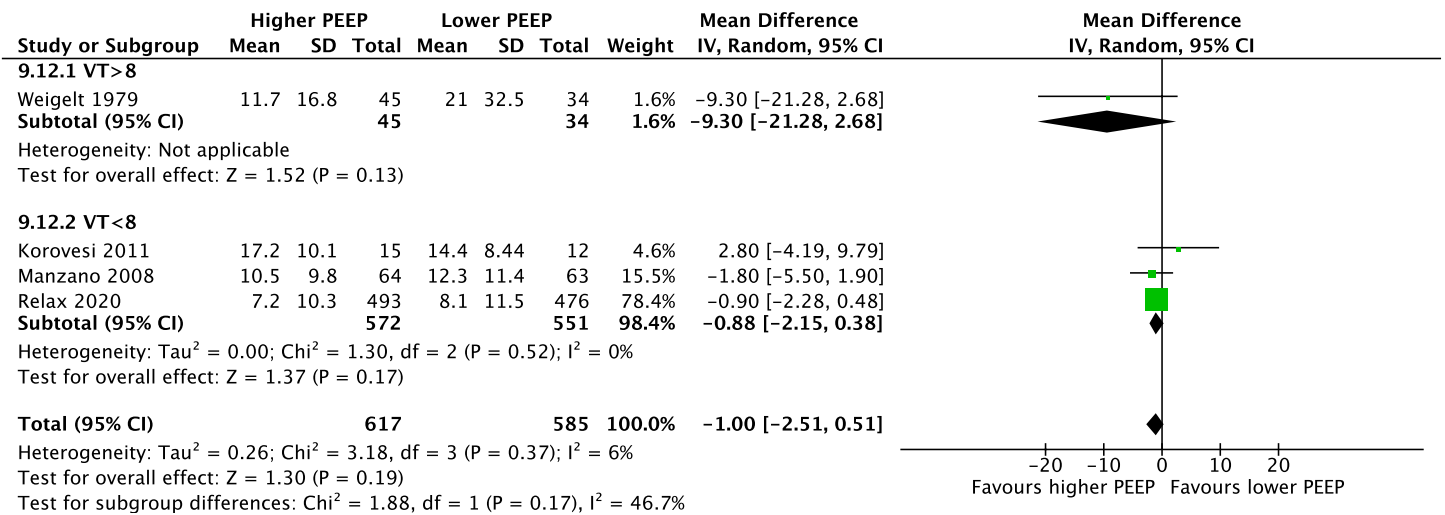

## Subgroup analysis (TV > 8 mL/kg vs. TV < 8 mL/kg)

### Hospital stay

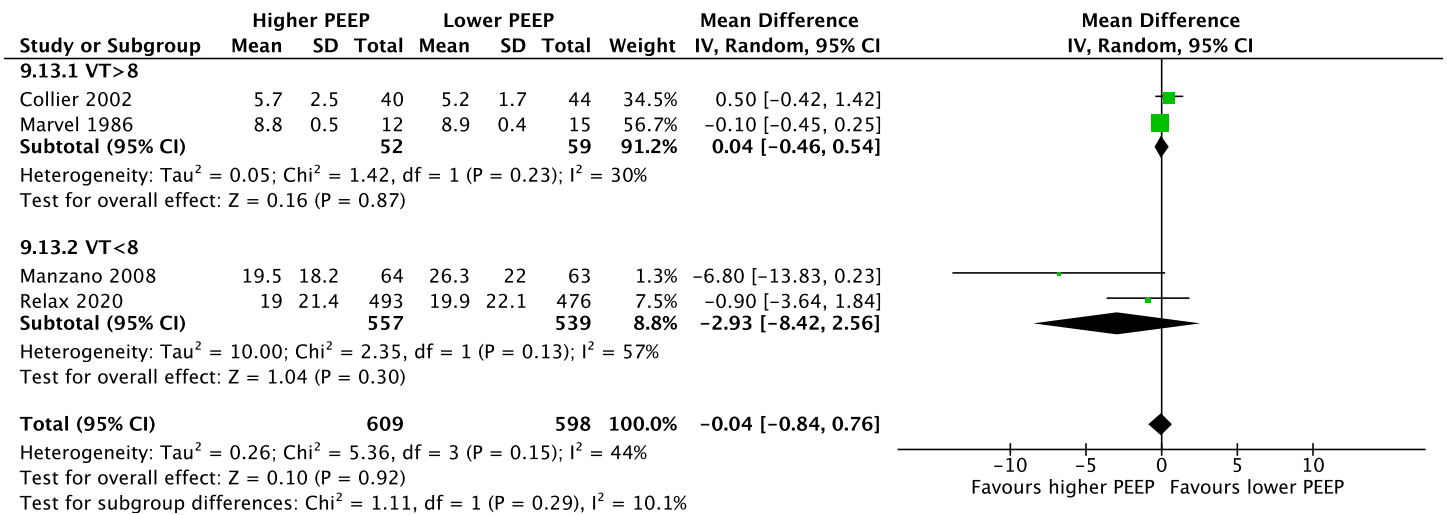

## Subgroup analysis (TV > 8 mL/kg vs. TV < 8 mL/kg)

### ICU mortality

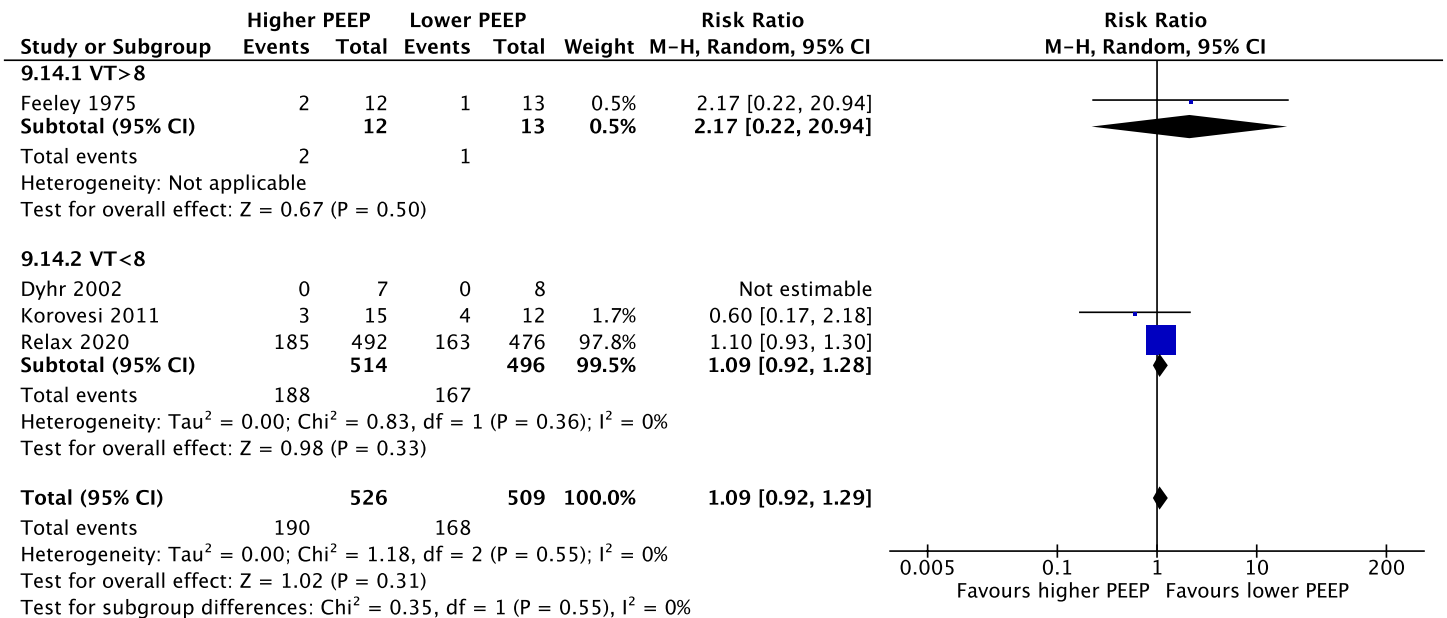



## Subgroup analysis (year of publication > 2000 vs. < 2000)

### Hospital mortality

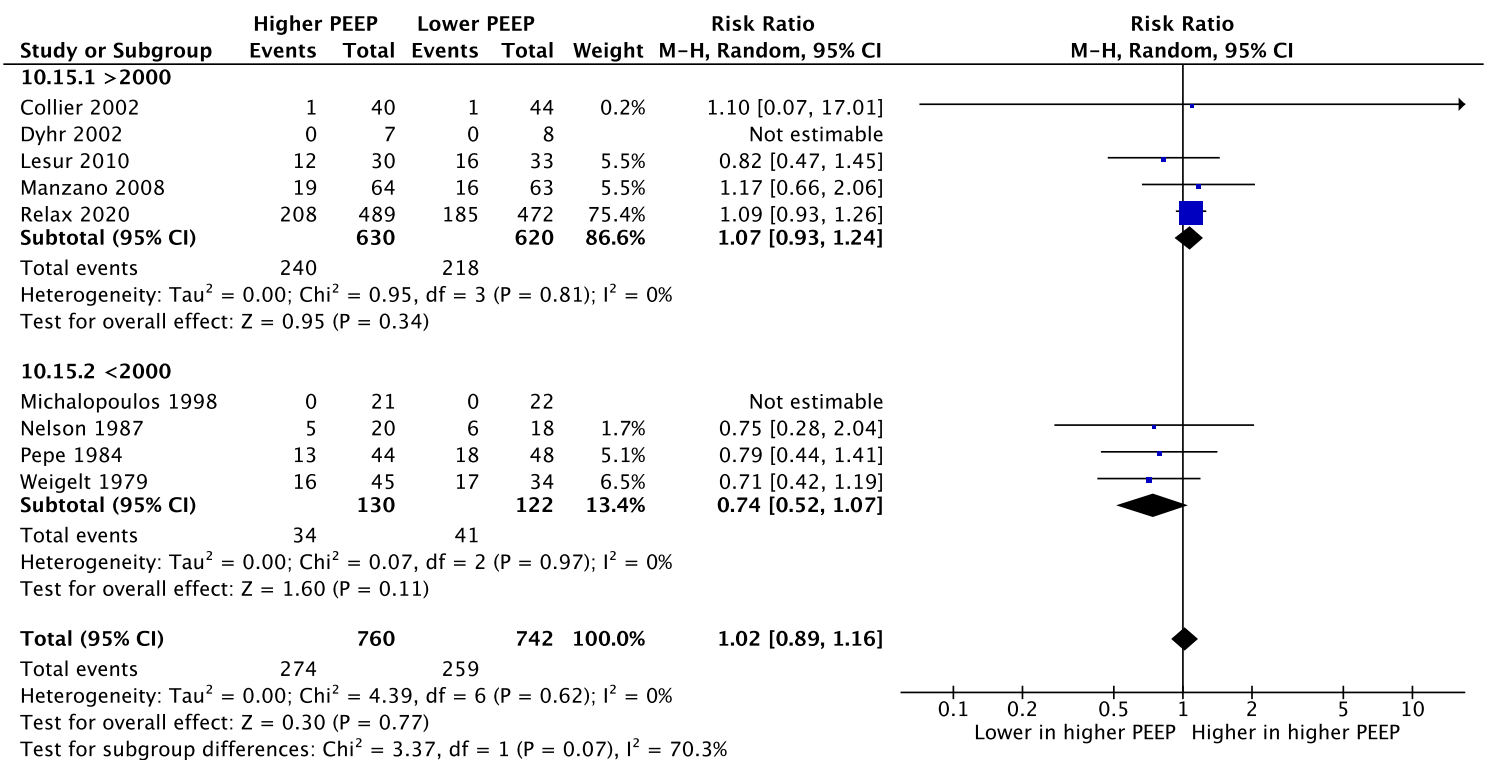

**Subgroup analysis (year of publication > 2000 vs. < 2000)**

**A-aDO<sub>2</sub>**

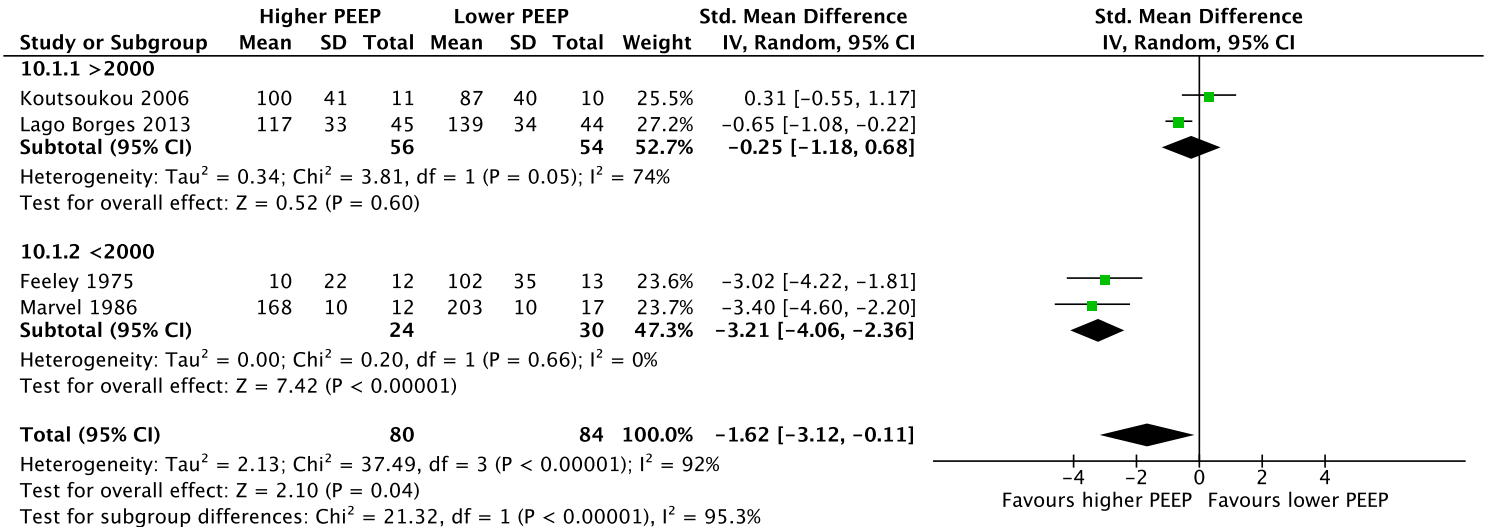

## Subgroup analysis (year of publication > 2000 vs. < 2000)

### Compliance

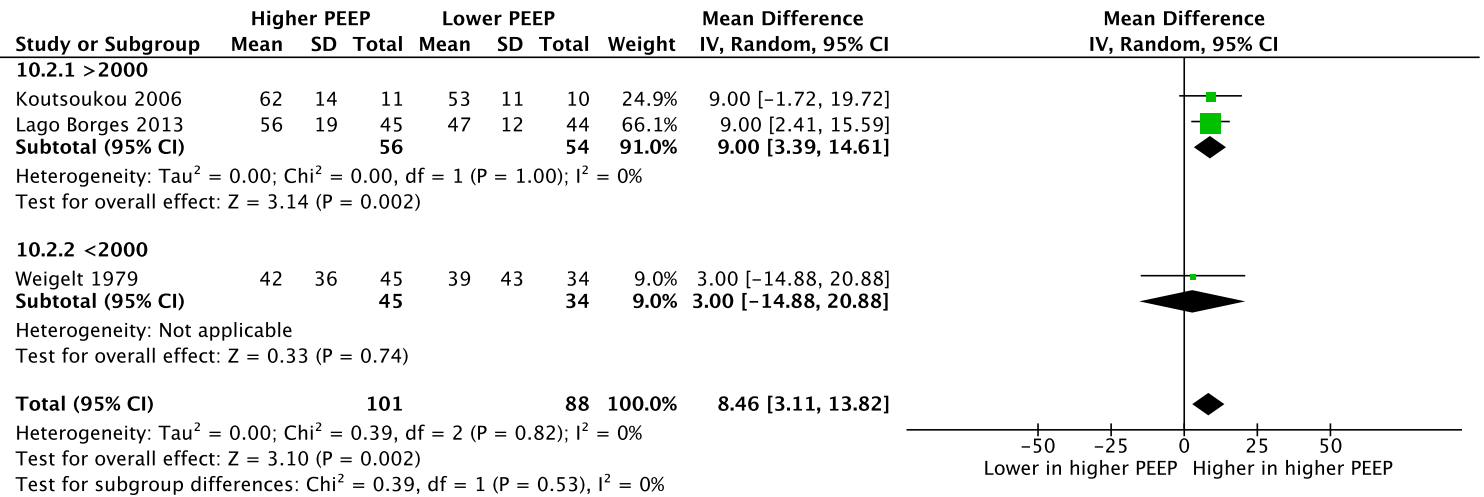

## Subgroup analysis (year of publication > 2000 vs. < 2000)

### Hypoxemia

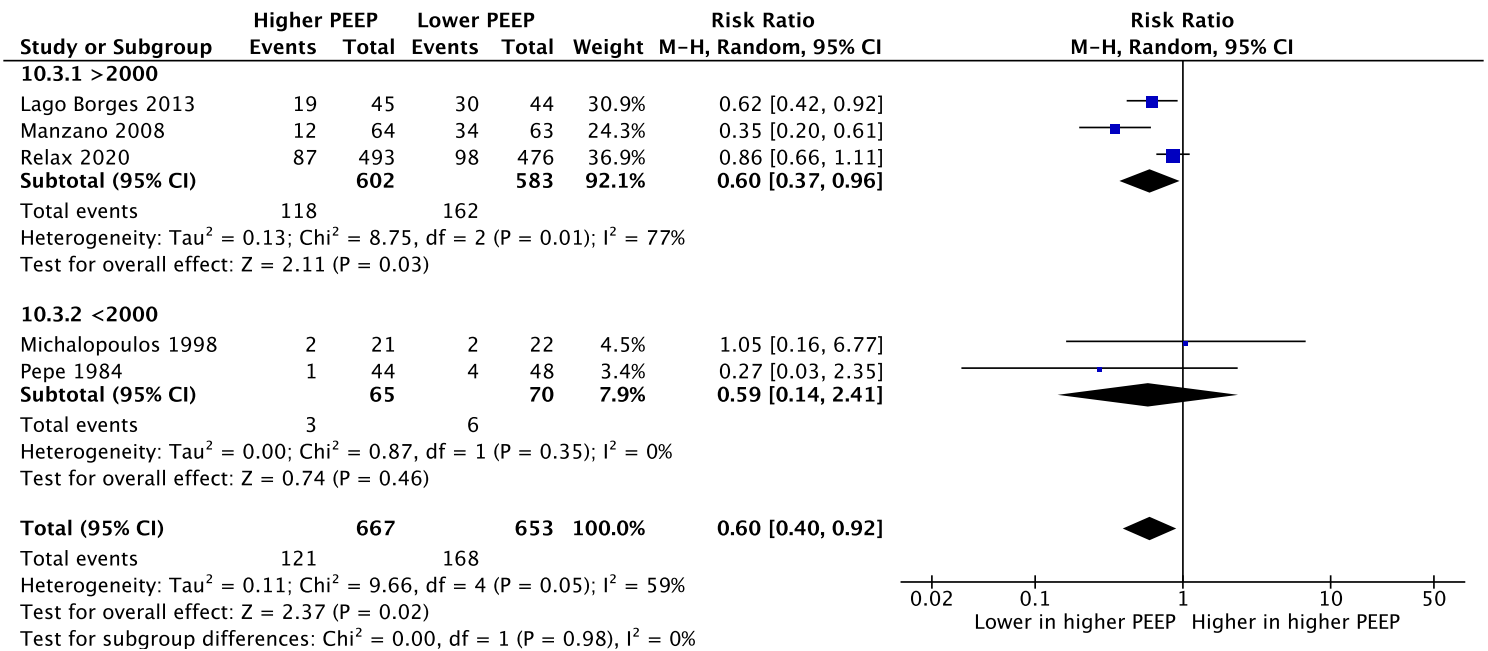

## Subgroup analysis (year of publication > 2000 vs. < 2000)

### Atelectasis

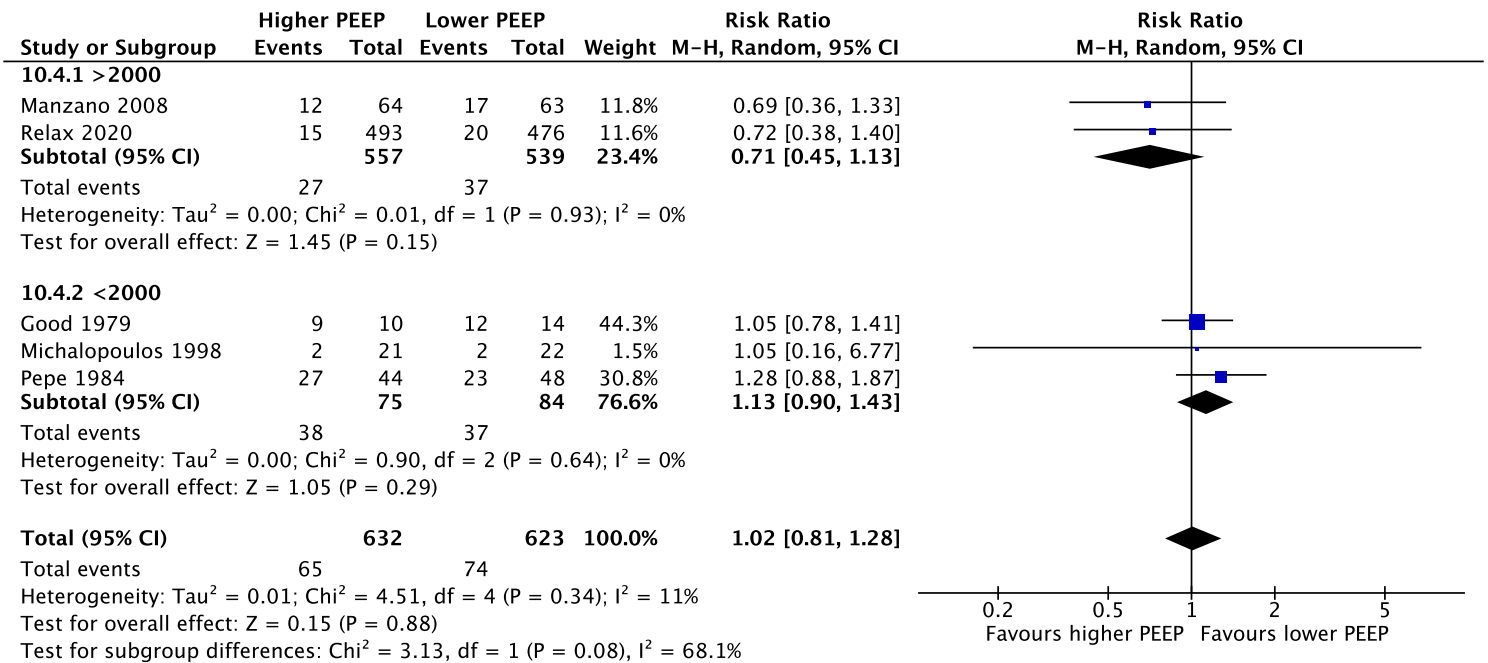

## Subgroup analysis (year of publication > 2000 vs. < 2000)

### Barotrauma

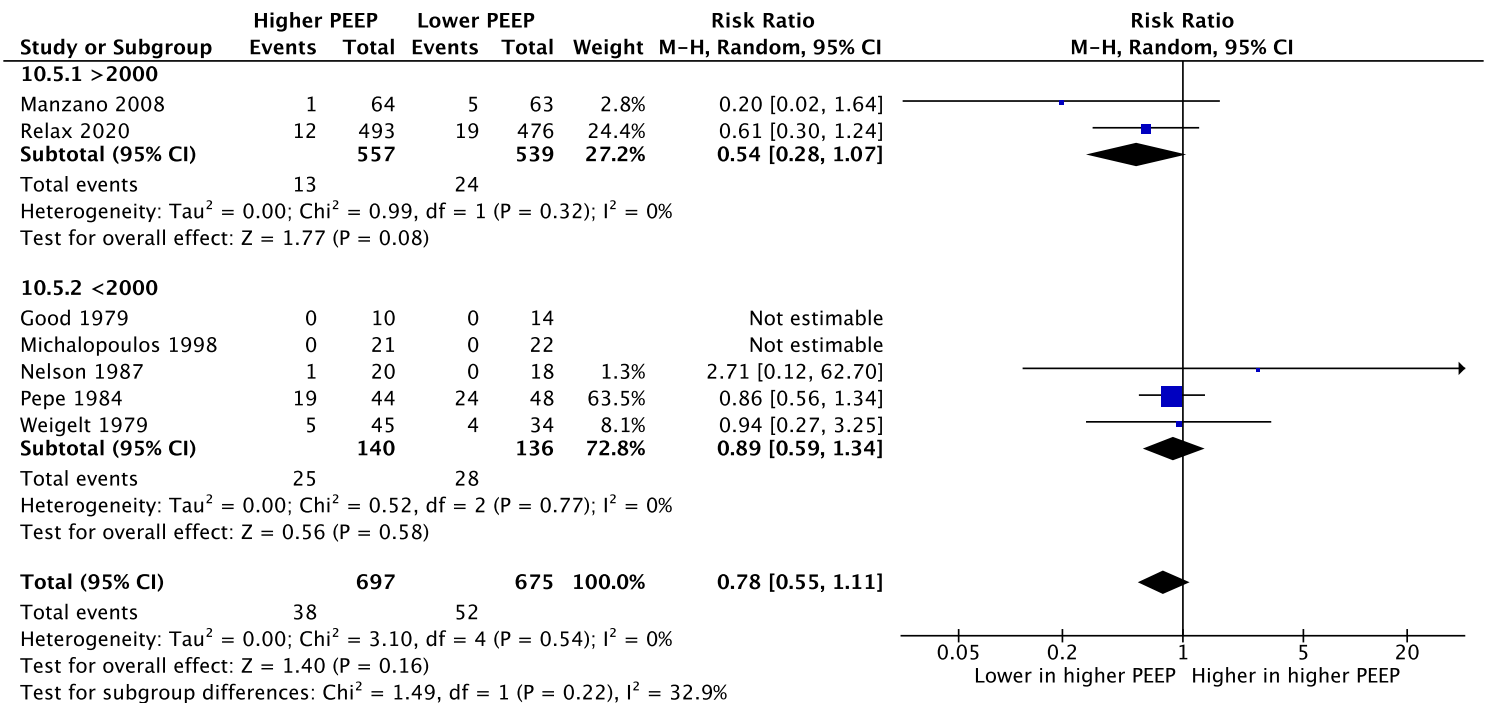

**Subgroup analysis (year of publication > 2000 vs. < 2000)**

**Ventilator-associated pneumonia**

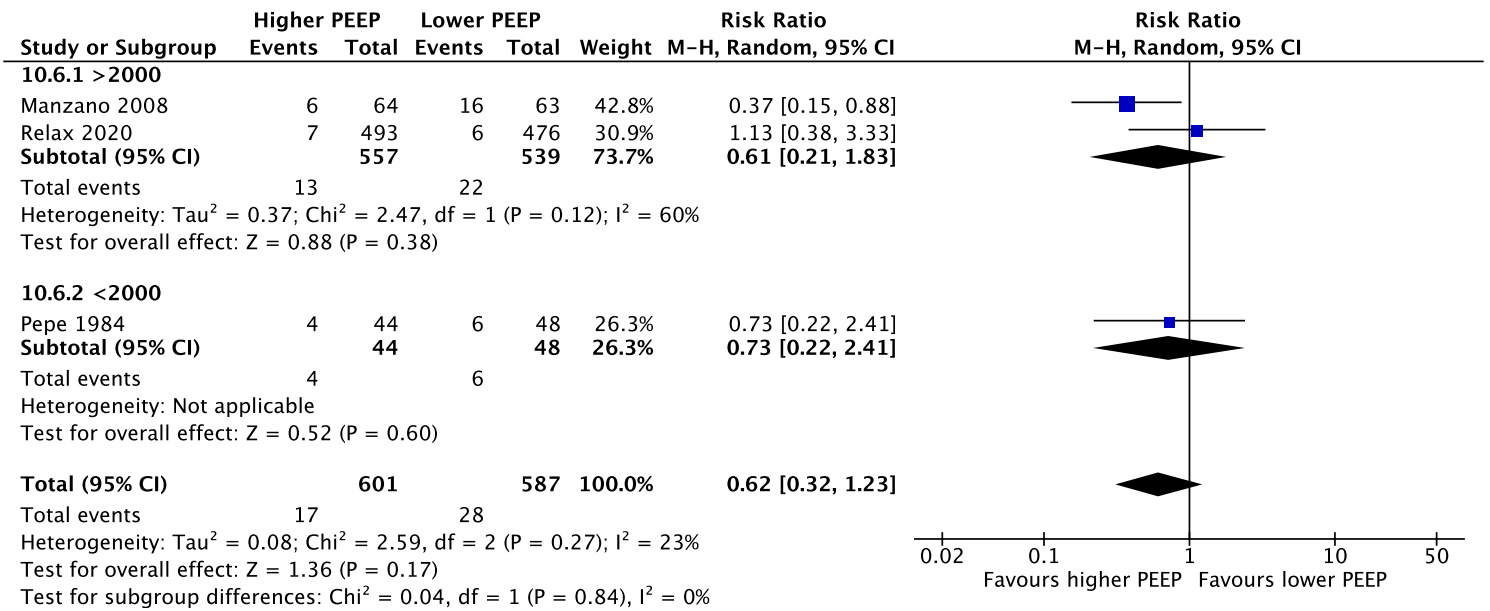

## Subgroup analysis (year of publication > 2000 vs. < 2000)

### ARDS

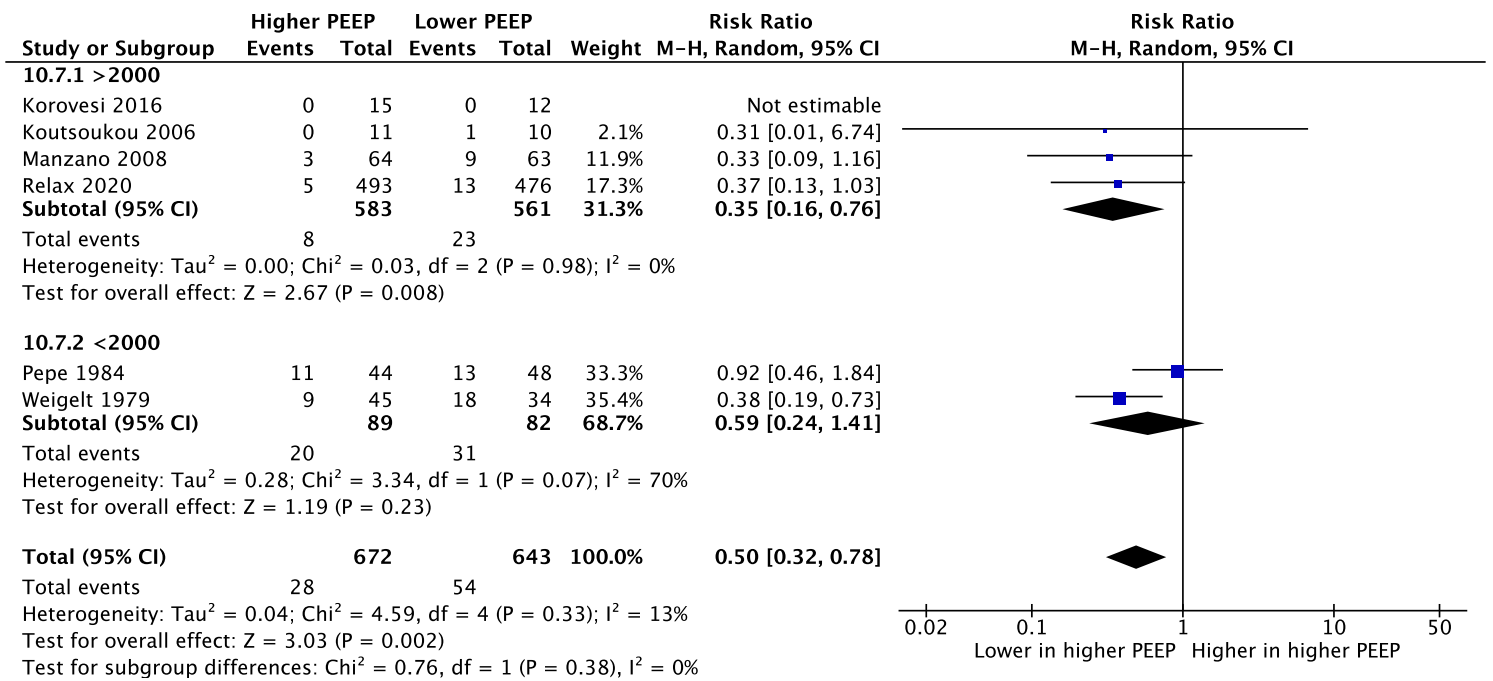



## Subgroup analysis (year of publication > 2000 vs. < 2000)

### Hypotension

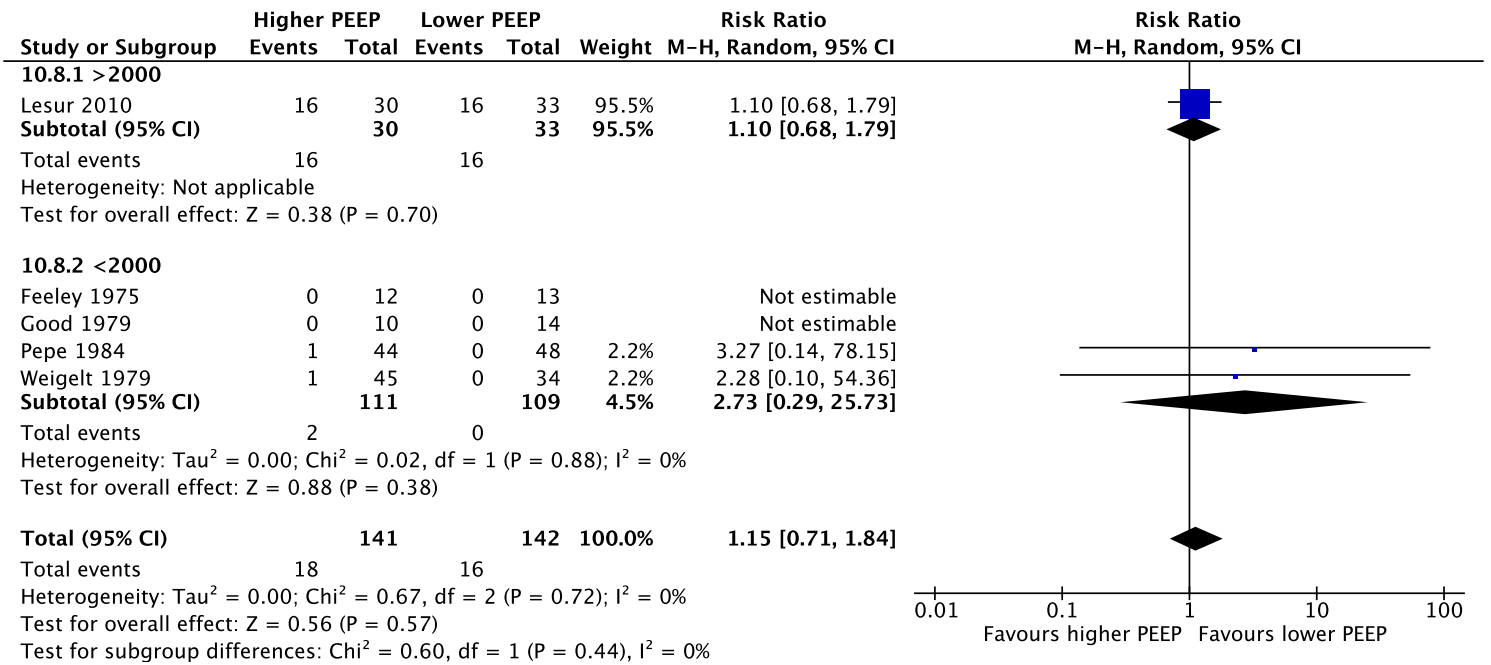

## Subgroup analysis (year of publication > 2000 vs. < 2000)

### Postoperative bleeding

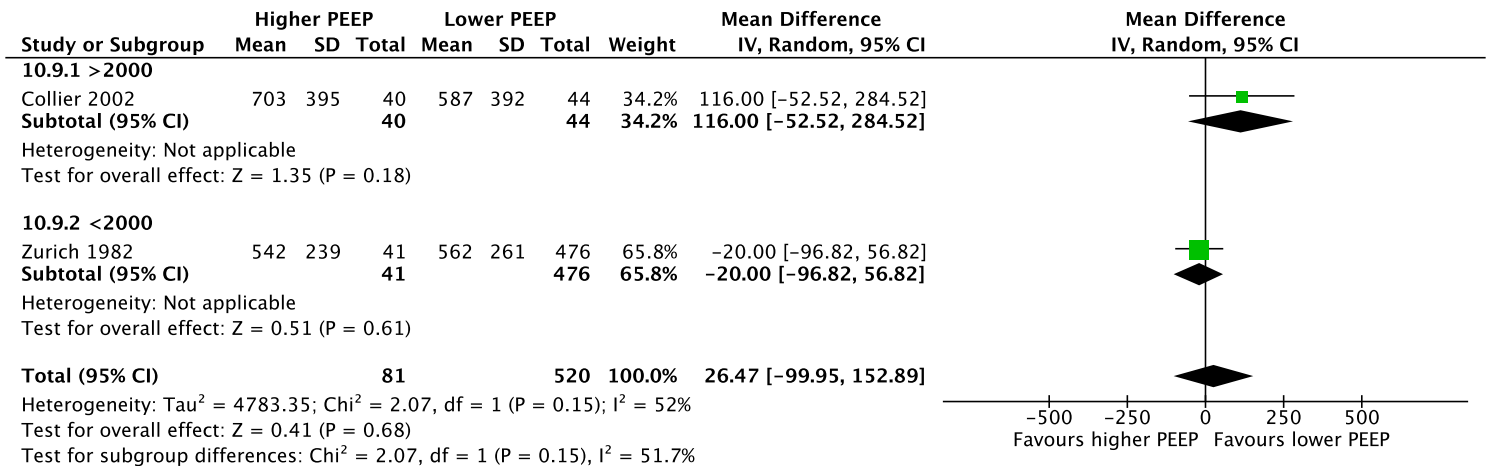

**Subgroup analysis (year of publication > 2000 vs. < 2000)**

**Packed red blood cell transfusion**

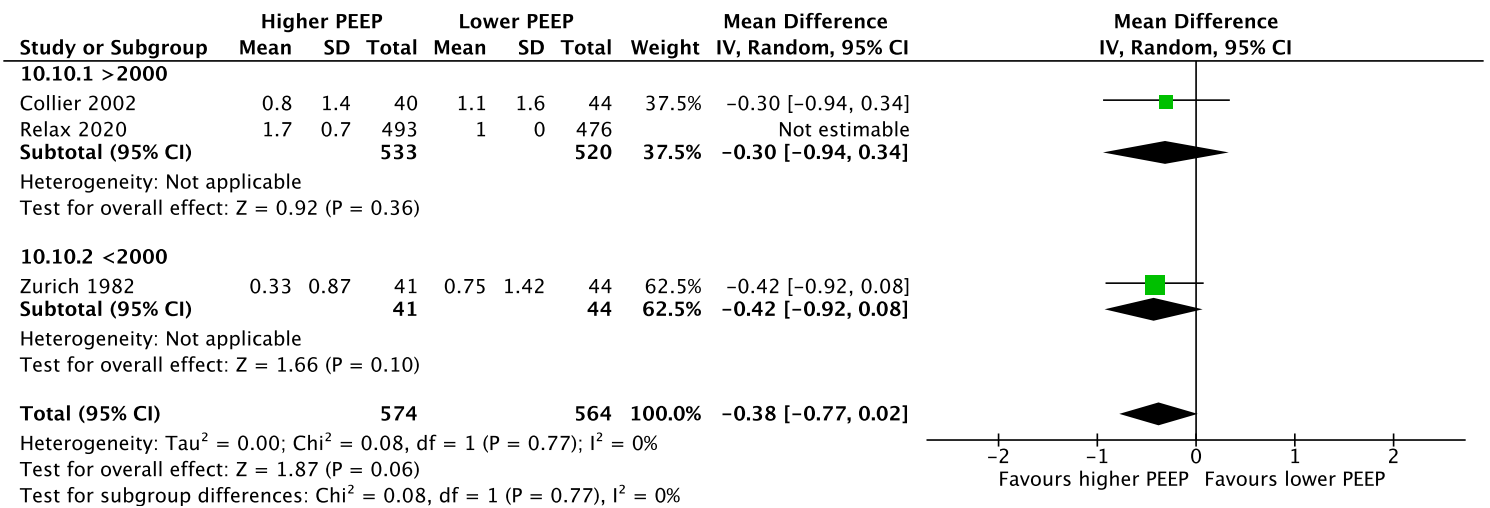

## Subgroup analysis (year of publication > 2000 vs. < 2000)

### Duration of ventilation

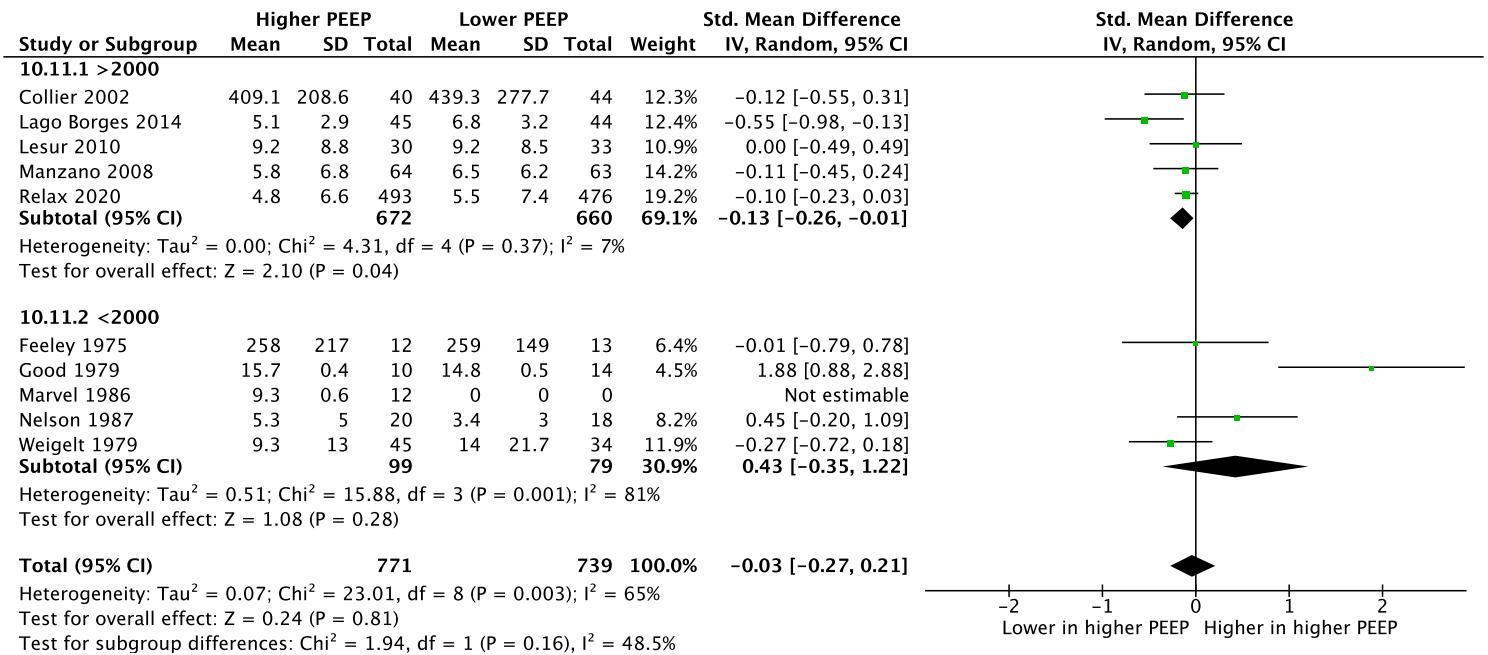

## Subgroup analysis (year of publication > 2000 vs. < 2000)

### ICU stay

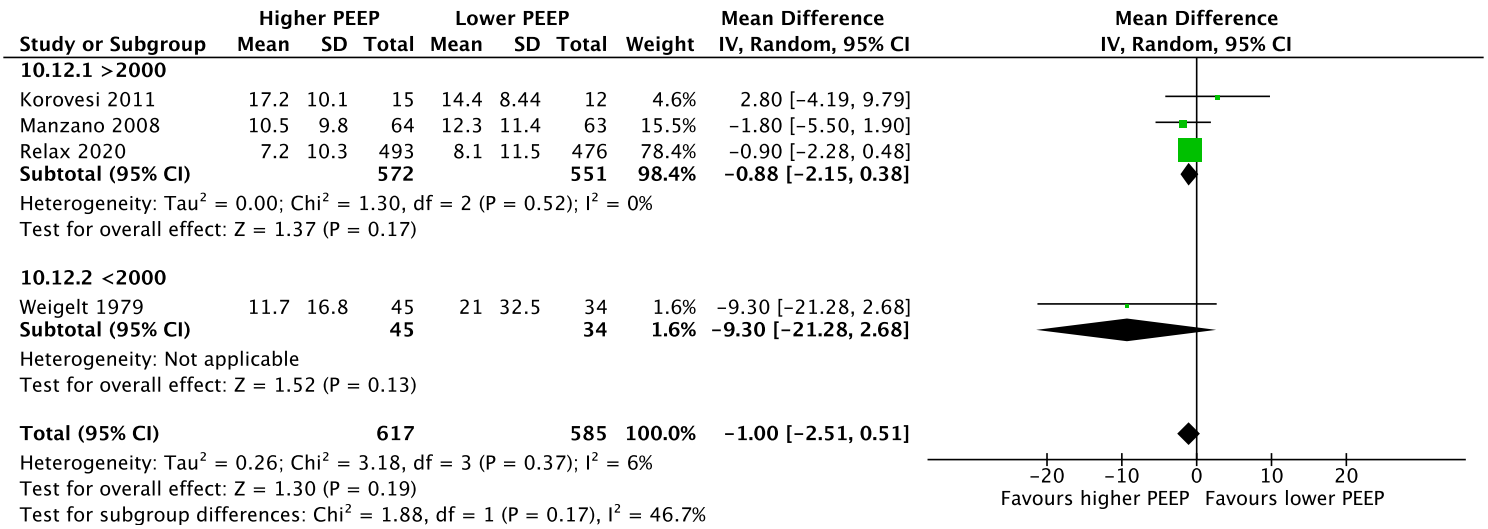

## Subgroup analysis (year of publication > 2000 vs. < 2000)

### Hospital stay

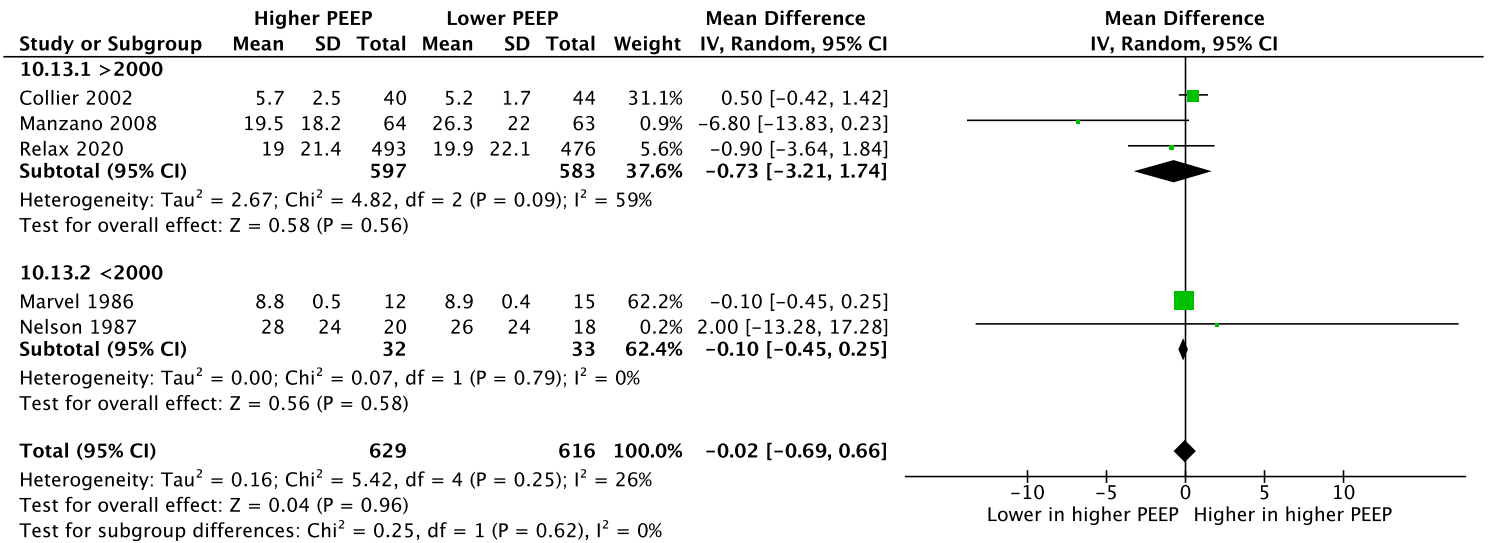

## Subgroup analysis (year of publication > 2000 vs. < 2000)

### ICU mortality

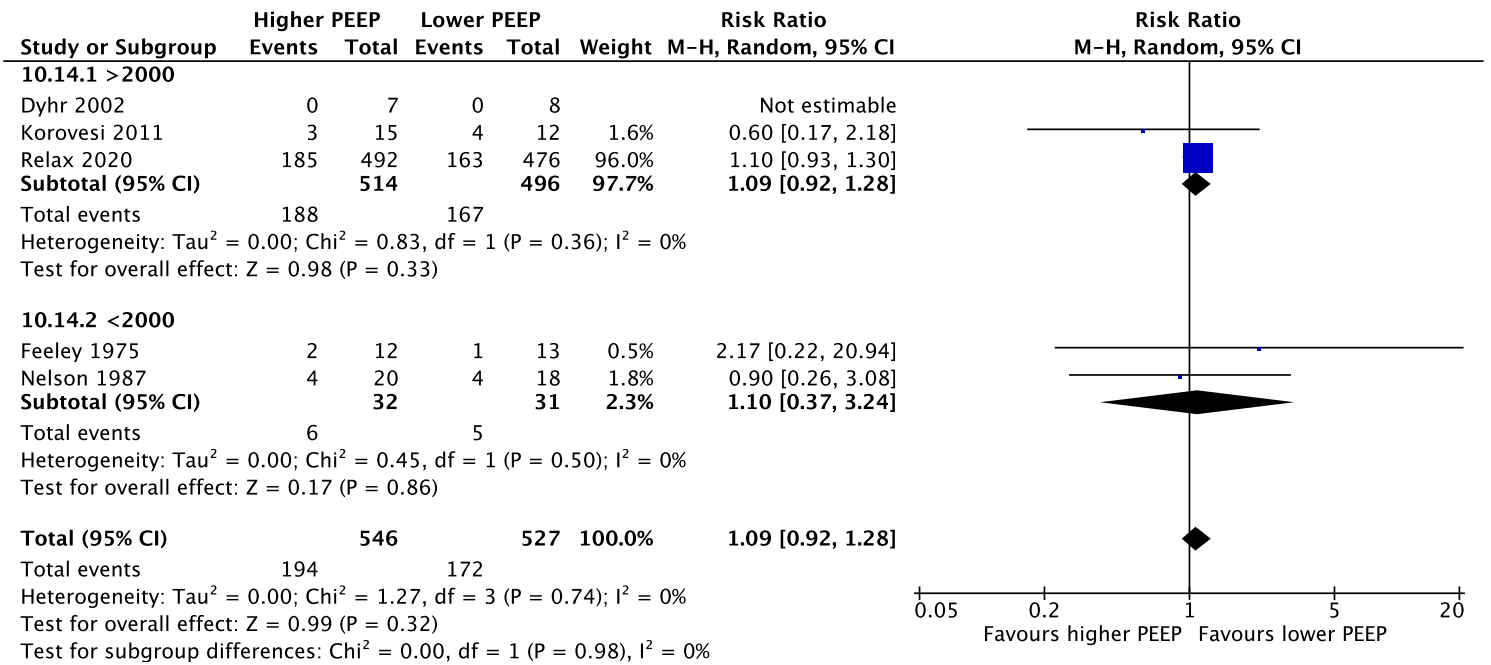

**Online Resource 10. Meta-regression**

| <b>Table S9. Meta-regression for the association between PEEP level and primary outcome and main secondary outcomes using tidal volume as covariate</b>                                                          |                                                     |                |
|------------------------------------------------------------------------------------------------------------------------------------------------------------------------------------------------------------------|-----------------------------------------------------|----------------|
| <b>Outcome</b>                                                                                                                                                                                                   | <b><math>\beta</math> (95% confidence interval)</b> | <b>P value</b> |
| Hospital mortality                                                                                                                                                                                               | -0.056 (-0.116 – 0.003)                             | 0.07           |
| PaO <sub>2</sub> /FiO <sub>2</sub>                                                                                                                                                                               | -8.20 (-32.8 – 16.4)                                | 0.51           |
| Risk of hypoxemia                                                                                                                                                                                                | -0.41 (-0.77 – -0.06)                               | 0.02           |
| Risk of barotrauma                                                                                                                                                                                               | 0.08 (-0.06 – 0.22)                                 | 0.28           |
| Risk of ARDS                                                                                                                                                                                                     | 0.01 (-0.12 – 0.15)                                 | 0.84           |
| Duration of ventilation                                                                                                                                                                                          | 0.01 (-0.05 – 0.06)                                 | 0.80           |
| Hospital stay                                                                                                                                                                                                    | -0.03 (-0.39 – 0.34)                                | 0.89           |
| Abbreviations: PEEP, positive end-expiratory pressure; PaO <sub>2</sub> /FiO <sub>2</sub> , arterial partial pressure of oxygen to fraction of inspired oxygen ratio; ARDS, acute respiratory distress syndrome. |                                                     |                |



## Online Resource 11. Trial sequential analysis

Trial sequential analysis assessing the relationship between higher vs. lower positive end-expiratory pressure (PEEP) and hospital mortality. The required information sizes to demonstrate or reject an 11% (vertical red line) relative risk reduction (RRR) for higher PEEP with a control group proportion of 33%, an alpha of 5%, and a beta of 10% is 6845 patients. The blue line represents the cumulative Z-curve of the meta-analysis of 1502 patients. The oblique red lines represent the trial sequential monitoring boundaries and the futility boundaries for 11% RRR, respectively. The green horizontal lines are the conventional 5% significance thresholds (Z-value = 1.96). A constant continuity correction of 1 was applied.

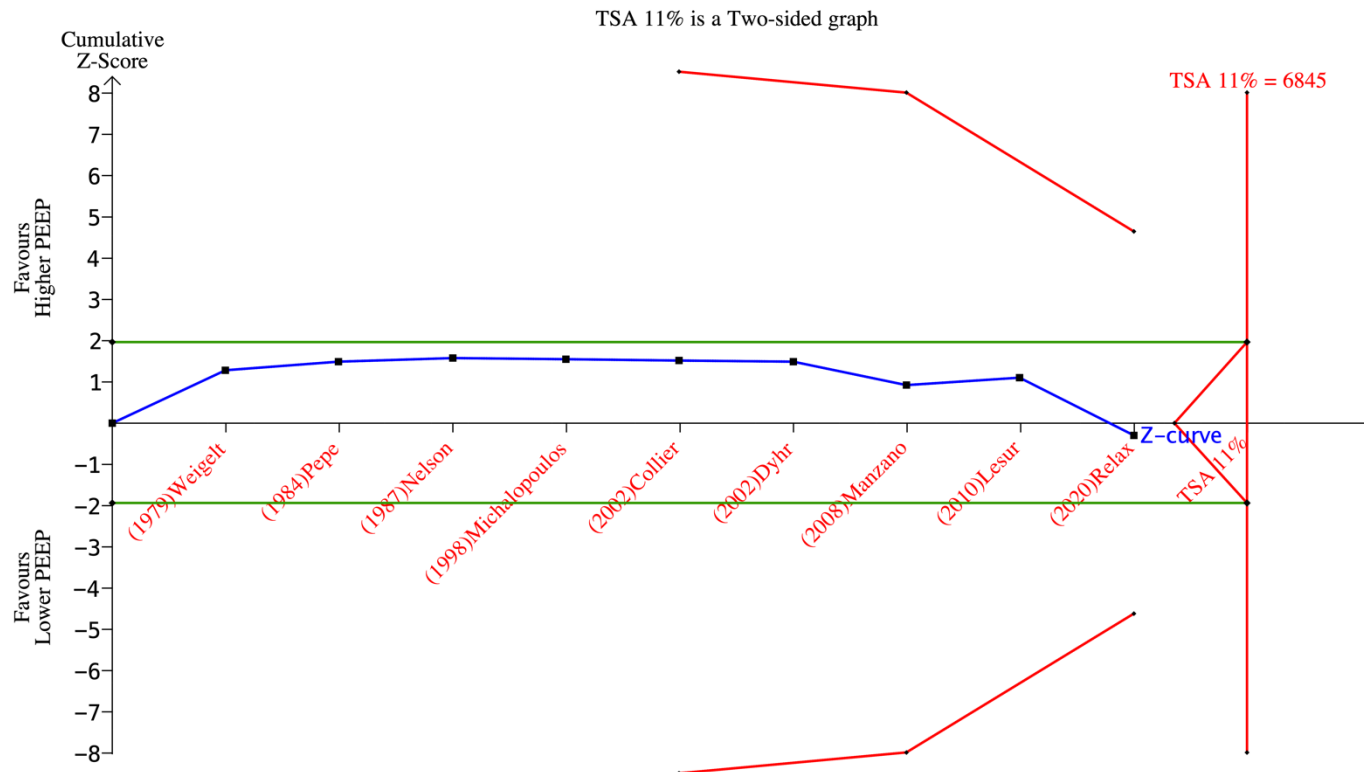

## References

- S1. Sterne JAC, Savović J, Page MJ, et al. RoB 2: a revised tool for assessing risk of bias in randomised trials. *BMJ*. 2019;366:l4898. doi:10.1136/bmj.l4898.
